# Supplementary material
Source: Research Square preprint supplement (doi:10.21203/rs.3.rs-9695257/v1)
Supplement: Supplementary file 1 [file 4417a59e37a8cfeca99b6409.xlsx]

## Sheet: Training Cohort
number.x	Gender	GE1	GE2	GE3	GE4	GE5	GE6	GE7	GE8	GE9	GE10	GE11	GE12	GE13	GE14	EPQN1	EPQN2	EPQN3	EPQN4	EPQN5	EPQN6	EPQN7	EPQN8	EPQN9	EPQN10	EPQN11	EPQN12	ASLEC1	ASLEC2	ASLEC3	ASLEC4	ASLEC5	ASLEC6	ASLEC7	ASLEC8	ASLEC9	ASLEC10	ASLEC11	ASLEC12	ASLEC13	ASLEC14	ASLEC15	ASLEC16	ASLEC17	ASLEC18	ASLEC19	ASLEC20	ASLEC21	ASLEC22
14198	女	1	0	0	0	0	0	0	0	0	0	0	0	0	0	1	1	0	1	1	1	1	1	1	0	1	1	1	1	1	3	5	3	5	5	2	2	5	2	2	1	1	2	1	1	1	1	1	1
26914	男	0	0	0	0	0	0	0	0	0	0	0	0	0	0	1	0	0	0	0	0	0	0	0	0	0	0	2	1	2	3	1	1	1	2	2	1	1	1	3	3	2	2	2	1	2	1	1	3
23151	男	1	1	0	0	0	0	0	0	0	0	0	0	0	0	0	0	0	0	0	0	0	0	0	0	0	0	1	1	1	1	1	1	1	1	1	1	1	1	1	1	1	1	1	1	1	1	1	1
27207	女	1	0	0	0	0	0	0	0	0	0	0	0	0	0	0	0	0	0	0	0	0	0	0	0	0	0	1	1	1	1	1	1	1	1	1	1	1	1	1	1	1	1	1	1	1	1	1	1
23380	女	1	0	0	0	0	0	0	0	0	0	0	0	0	0	0	0	0	1	0	0	0	0	0	0	0	0	2	2	2	2	1	1	1	2	1	2	1	3	1	1	1	1	1	1	2	1	1	1
23200	女	0	0	0	0	1	0	0	0	0	0	0	0	0	0	1	1	1	1	1	0	1	1	1	1	1	1	2	1	2	2	3	2	2	2	4	3	1	2	1	2	2	3	1	1	2	2	2	3
28730	男	0	0	0	0	0	0	0	0	0	0	0	0	0	0	0	0	0	0	0	0	0	0	0	0	0	0	1	1	1	1	1	1	1	1	1	1	1	1	3	1	2	1	1	1	1	1	1	1
10920	男	1	1	0	0	0	0	0	0	0	0	0	0	0	0	1	1	1	1	1	0	1	0	1	0	0	0	2	3	4	2	3	1	2	2	2	1	1	2	4	2	4	2	2	2	3	2	3	4
25010	男	0	0	0	0	0	0	0	0	0	0	0	0	0	0	1	0	0	1	0	0	0	0	0	0	0	0	1	1	1	1	1	1	1	1	1	1	1	1	1	1	1	1	1	1	1	1	1	1
23201	男	1	0	0	0	1	0	0	0	0	0	0	0	0	0	1	0	0	1	1	1	0	0	0	1	1	1	2	2	2	1	1	1	1	2	1	1	1	1	1	1	2	1	1	1	2	1	1	2
28203	男	0	0	1	0	0	0	0	0	0	0	0	0	0	0	0	0	0	0	0	0	0	0	0	0	0	0	2	2	2	2	1	2	2	1	2	2	1	1	3	2	2	2	2	2	2	2	3	1
23769	女	0	0	0	0	0	0	0	0	0	0	0	0	0	0	1	1	1	0	0	1	1	0	1	1	1	1	3	3	2	3	1	2	1	3	3	1	1	1	1	1	4	2	1	1	2	1	1	4
23122	男	1	0	0	0	0	0	0	0	0	0	0	0	0	1	1	0	1	1	1	0	0	0	0	1	1	0	3	2	4	2	2	2	1	1	2	4	1	1	1	2	3	1	1	1	3	3	3	3
23606	男	1	0	0	0	1	0	0	0	0	0	0	0	0	0	1	1	1	1	0	0	1	0	0	0	1	1	3	3	2	2	2	1	3	2	3	2	1	1	1	3	4	3	3	1	1	1	2	2
23517	男	0	0	1	0	1	0	0	0	0	0	0	0	0	0	0	0	0	0	0	0	0	0	0	0	0	0	1	1	1	1	1	1	2	1	1	1	1	1	2	1	1	2	1	1	1	1	1	1
25773	男	1	0	0	0	0	0	0	0	1	1	1	0	0	0	1	1	1	1	1	1	1	1	1	1	0	0	1	1	3	1	1	2	1	2	3	1	1	1	1	1	1	1	1	1	1	3	1	4
24525	男	0	0	0	0	1	0	0	0	0	0	0	0	0	0	1	1	0	1	0	0	0	0	0	0	0	0	2	2	3	2	3	1	1	1	2	1	1	1	1	1	2	4	2	1	1	1	1	2
25971	女	0	0	0	0	0	0	0	0	0	1	1	1	0	0	1	1	1	1	1	1	1	1	0	1	1	1	2	1	1	1	1	1	4	1	2	1	1	1	1	1	1	2	1	1	1	1	1	3
25108	男	1	0	0	0	0	0	0	0	0	0	0	0	0	0	1	0	0	0	0	0	1	1	1	1	0	0	3	3	4	3	3	3	3	3	3	3	3	3	4	4	4	4	4	3	3	3	3	3
26942	男	0	1	0	0	0	0	0	0	1	0	0	0	0	0	1	0	0	0	1	0	0	0	0	0	1	0	3	3	2	2	2	2	2	1	2	2	1	1	2	1	2	2	1	1	2	3	1	2
25945	男	0	0	0	0	1	0	0	0	1	1	1	0	0	0	1	1	1	1	1	1	1	0	1	1	1	0	3	3	4	2	2	2	5	4	3	1	1	4	4	3	5	2	1	1	3	1	1	4
25975	女	0	0	0	0	0	0	0	0	0	0	1	0	0	0	1	1	0	1	0	1	1	0	1	1	0	0	3	3	3	3	1	2	2	2	3	4	1	1	1	2	3	3	3	1	4	1	1	3
25657	女	0	0	0	0	0	1	1	1	0	0	0	0	0	0	1	1	1	1	1	0	1	0	1	1	0	1	3	4	4	5	3	2	3	3	3	2	1	2	1	1	5	4	4	4	4	1	1	4
27370	女	0	0	0	0	0	0	0	1	0	0	0	0	0	0	1	1	1	1	1	1	1	1	1	1	1	1	2	3	3	2	2	2	1	2	2	2	1	1	1	2	3	2	1	2	1	1	1	2
23390	女	0	0	0	0	1	0	0	0	0	0	1	0	0	0	1	0	0	0	0	0	0	0	1	0	0	0	3	1	4	2	1	3	1	1	5	1	1	1	1	2	1	1	2	1	1	1	1	2
25781	女	0	0	0	0	0	0	0	0	0	0	0	0	0	1	1	1	1	0	0	1	0	0	1	0	0	0	2	2	1	2	1	3	1	1	3	1	1	2	3	2	3	4	2	3	4	3	3	5
22966	女	0	0	0	0	0	0	0	0	0	0	0	0	0	1	1	0	1	1	0	1	1	1	1	0	0	1	3	3	3	2	2	1	2	3	3	3	4	2	2	1	2	4	3	1	2	1	1	3
26379	女	1	1	0	0	0	0	0	0	0	0	0	0	0	0	1	1	1	1	1	1	1	1	1	1	1	1	2	2	2	2	2	1	1	2	2	2	2	2	2	2	2	2	2	2	2	2	2	2
13980	女	1	0	0	0	0	0	0	1	0	0	0	0	0	1	1	1	1	1	1	1	1	0	0	1	1	1	4	4	4	1	2	3	1	2	3	1	3	1	1	1	1	1	3	3	1	1	1	4
23909	女	0	0	0	0	1	0	0	0	0	0	0	0	0	0	0	0	0	0	0	0	0	0	1	0	0	0	2	2	3	1	2	1	1	1	2	1	1	2	1	1	1	3	2	1	1	1	1	2
25613	女	0	0	0	0	0	0	0	1	0	0	0	0	0	1	1	1	1	1	1	1	1	1	1	1	1	1	2	2	2	3	2	2	3	3	2	2	1	3	3	1	2	2	2	1	1	2	1	2
26578	女	0	0	0	0	0	1	1	1	0	0	0	0	0	0	1	1	1	1	1	1	1	1	1	1	1	1	3	3	2	3	2	2	2	2	2	2	1	1	3	2	2	2	2	3	3	1	1	2
25287	女	1	0	0	0	0	0	0	0	0	0	0	0	0	0	1	1	0	1	1	0	1	1	1	1	0	1	5	1	3	2	2	2	1	1	4	2	1	1	1	4	3	3	2	3	4	5	1	4
25283	女	0	0	0	0	1	0	0	0	0	0	0	0	0	0	1	1	1	1	1	1	1	1	1	1	1	1	3	2	2	3	2	1	2	2	2	2	1	1	3	2	2	2	2	2	2	1	1	3
25321	女	0	0	0	0	1	0	0	0	0	0	0	0	0	0	1	1	1	1	1	1	1	1	1	1	1	1	5	5	2	5	4	2	2	2	2	2	2	2	2	2	4	5	5	3	1	1	1	4
25849	女	0	0	0	0	1	0	0	0	0	0	0	0	0	0	1	1	0	0	0	0	1	0	1	0	1	1	3	3	3	3	2	2	3	2	2	3	3	3	4	3	4	3	3	4	4	3	3	4
25266	女	0	0	0	0	1	0	0	1	0	0	0	0	0	0	1	1	0	1	1	1	1	1	1	1	1	1	2	3	4	2	2	2	1	4	4	1	1	1	1	1	1	5	3	1	1	1	1	5
25312	女	0	0	0	0	0	0	0	0	0	0	0	1	0	0	1	1	1	1	0	1	1	0	1	1	0	1	4	4	4	4	3	2	4	2	4	2	1	2	4	3	3	2	3	2	3	1	1	4
25232	女	1	0	0	0	0	0	0	0	0	0	0	0	0	0	1	1	0	1	1	0	1	0	1	0	0	0	3	1	3	3	3	2	3	4	3	3	2	3	3	2	1	1	3	1	3	1	1	3
25338	女	0	1	0	1	1	0	0	0	0	0	0	0	1	0	1	1	0	1	1	1	1	1	0	1	1	0	3	2	3	2	2	3	1	1	2	1	1	3	1	1	1	4	5	1	1	1	1	4
25224	男	0	0	0	0	0	0	0	0	0	0	0	0	0	1	1	0	0	0	1	0	0	0	1	0	0	0	3	3	2	3	1	1	1	1	1	1	1	1	1	1	1	1	1	1	1	3	1	1
25396	女	0	0	0	1	0	1	0	1	0	0	1	0	0	0	1	1	0	1	1	1	1	1	1	1	1	1	3	2	5	2	2	2	1	1	5	3	1	2	1	1	2	2	5	3	3	1	1	3
26711	女	0	0	0	0	1	0	0	0	0	0	1	1	0	0	1	0	1	1	1	1	1	1	1	1	1	1	2	3	3	3	3	3	1	2	3	1	1	1	1	2	3	3	3	3	3	1	1	3
23959	女	0	0	0	0	0	0	0	0	0	0	0	1	0	0	0	0	1	1	0	0	1	0	0	0	0	0	3	2	2	2	2	1	1	1	1	1	1	1	1	1	1	1	1	1	1	1	1	1
26144	女	0	0	0	0	0	0	0	0	0	0	1	0	1	0	1	1	1	1	1	1	1	1	1	1	1	1	4	3	3	3	3	3	3	3	3	2	2	3	3	2	2	3	3	1	3	3	3	3
23917	女	0	0	0	0	0	0	0	0	0	0	0	0	0	0	0	1	0	0	0	1	0	0	1	1	0	0	1	1	1	3	2	1	2	2	3	3	3	1	2	3	2	3	3	1	2	3	3	3
26493	女	0	0	0	0	0	0	0	0	0	0	0	0	0	0	1	1	0	1	0	1	0	0	1	1	1	0	3	4	3	3	3	2	3	3	3	2	4	3	3	3	2	3	4	3	3	3	2	3
27990	女	1	0	0	0	0	0	0	0	0	0	0	0	0	0	0	0	1	1	0	0	1	0	0	0	0	0	2	2	3	4	1	2	1	1	4	1	1	1	1	1	3	2	1	1	1	2	1	4
23383	女	0	0	0	0	0	0	0	0	0	0	0	0	0	0	1	0	0	0	1	1	1	0	1	0	0	1	1	1	3	1	2	1	1	1	2	1	1	1	2	1	2	1	1	2	1	1	1	3
26244	女	1	0	0	0	0	0	0	0	0	0	0	0	0	0	1	1	0	1	1	0	0	0	1	0	1	0	2	2	3	2	2	2	3	2	3	2	1	1	1	2	2	2	1	2	2	1	1	3
26873	女	0	0	0	0	1	0	0	1	0	0	0	0	0	0	1	1	1	1	1	1	1	1	1	1	1	1	2	1	4	4	2	1	5	1	1	4	1	1	1	1	1	4	3	3	1	1	1	4
27284	女	0	0	0	0	0	0	0	0	0	0	0	0	0	0	1	1	1	1	1	1	1	1	1	1	1	1	4	4	4	4	4	3	3	1	3	1	1	1	1	3	4	1	3	1	1	1	1	3
27253	女	1	0	0	0	0	0	0	0	0	0	0	0	0	1	1	1	1	1	1	1	1	1	1	0	1	1	3	2	2	4	1	2	1	1	1	1	1	1	1	1	3	1	3	1	1	1	1	1
25238	女	0	1	0	1	1	0	0	0	0	0	0	0	0	0	1	1	1	1	1	1	1	1	1	1	1	1	3	3	3	4	2	2	3	4	4	4	4	3	4	3	3	4	4	3	3	4	3	4
24712	女	0	0	0	0	1	0	0	0	0	0	1	1	1	0	1	1	0	1	1	1	1	1	1	0	1	0	3	2	4	4	2	1	4	2	3	1	2	3	3	2	3	2	4	2	3	3	2	3
26829	女	1	0	0	0	0	0	0	0	0	0	1	1	0	0	1	1	1	1	1	1	1	1	1	1	1	1	2	3	2	3	3	3	1	1	2	2	1	1	1	2	3	1	2	1	1	1	1	3
23625	女	0	0	0	0	0	0	0	0	0	0	0	0	0	0	1	1	1	1	1	1	1	0	0	0	1	1	3	2	2	2	2	2	3	3	2	2	3	3	4	2	3	2	2	2	3	3	2	3
27192	男	1	0	0	0	0	0	0	0	0	0	0	0	0	0	1	1	1	1	1	1	1	1	1	0	1	1	2	2	2	3	2	2	3	3	2	1	1	2	2	2	2	2	3	2	3	3	3	3
25034	男	1	0	0	0	0	0	0	0	0	0	0	0	0	0	1	1	0	1	0	1	0	1	0	0	0	0	1	1	2	2	1	1	3	2	2	2	4	4	5	3	4	5	5	3	5	3	3	3
25251	女	0	0	0	1	1	0	0	0	0	0	0	0	1	0	1	0	0	1	1	1	0	0	1	0	1	0	2	2	2	3	2	2	1	1	2	1	1	1	1	1	3	3	3	1	2	1	1	3
23919	女	0	0	0	0	1	0	0	0	0	0	0	1	0	0	1	1	0	1	0	0	1	1	1	1	1	0	3	2	3	2	1	1	1	2	2	2	1	2	3	2	3	3	4	3	3	1	1	3
25454	女	0	0	0	0	0	0	0	0	0	0	0	0	0	1	1	1	1	0	1	0	1	1	1	1	1	1	4	4	3	3	3	3	2	2	3	3	1	3	3	3	3	3	3	3	1	1	1	4
23915	男	0	0	0	0	0	0	0	0	0	0	0	0	0	0	1	0	0	1	0	1	1	0	1	0	1	0	3	3	4	4	4	2	4	3	2	3	1	1	4	2	2	2	3	2	3	3	3	4
26823	男	0	0	0	0	0	0	0	1	0	0	0	0	0	0	1	1	0	1	1	1	1	0	1	1	1	1	4	4	2	2	2	4	5	4	2	1	1	5	1	2	3	3	5	1	1	1	1	4
26733	女	0	0	0	1	1	0	0	1	0	0	0	0	0	0	1	0	0	1	0	1	1	0	1	1	1	0	3	4	3	4	2	2	1	2	3	1	1	1	1	2	3	3	4	1	1	1	1	4
24088	女	0	0	0	0	0	0	0	1	0	0	0	1	0	1	1	1	1	1	0	0	0	0	0	1	0	0	3	2	3	2	3	2	3	4	2	1	3	2	1	2	2	2	2	2	3	1	1	3
25257	男	0	1	0	0	1	0	0	0	0	0	0	0	0	0	1	1	1	1	1	1	1	1	1	1	1	1	3	3	3	3	3	1	3	3	3	2	1	1	3	2	2	5	3	3	1	1	1	4
23929	女	0	0	0	0	0	0	0	0	0	0	0	0	0	0	1	1	1	1	1	1	1	1	1	1	1	1	3	3	3	3	2	2	4	3	3	2	1	1	1	1	2	2	2	2	1	1	1	1
27584	女	0	0	0	0	0	0	0	0	0	0	0	0	0	0	1	1	1	1	0	0	0	0	1	1	1	0	3	2	2	2	2	2	2	1	2	1	1	1	1	2	2	2	2	2	1	3	1	2
27453	女	0	0	0	0	0	0	0	0	0	0	0	0	0	0	1	0	0	0	1	0	0	0	0	0	1	0	3	1	1	1	2	2	1	1	1	1	1	1	2	2	1	1	2	2	1	1	1	2
27579	女	1	0	0	0	0	0	0	0	0	0	0	0	0	0	1	1	0	0	0	1	1	0	0	0	0	0	2	2	2	2	2	2	1	2	2	2	1	2	1	2	2	2	2	2	3	3	2	3
23574	女	0	0	0	0	0	0	0	0	0	0	0	0	0	0	1	1	1	1	1	1	1	0	1	1	1	0	2	2	2	2	2	2	2	1	2	2	2	2	2	2	2	2	2	2	1	1	1	2
27697	女	0	0	0	0	1	0	0	0	0	0	0	1	0	0	1	1	1	1	1	1	1	0	1	1	1	1	4	2	3	4	2	2	1	2	2	2	1	5	5	2	2	4	2	1	2	1	1	5
27537	女	0	0	0	0	0	0	0	0	0	0	0	0	0	0	1	1	0	1	1	0	0	0	0	0	1	0	2	2	2	1	3	1	3	2	1	1	1	1	1	1	1	3	1	2	1	1	2	2
26891	女	1	0	0	0	0	0	0	0	0	0	0	0	0	0	1	1	1	1	1	1	1	1	0	1	1	1	2	2	2	2	2	2	2	2	2	2	1	1	2	1	2	1	2	2	2	1	1	2
27451	女	0	0	0	0	1	0	0	0	0	0	1	0	0	0	1	1	0	1	0	1	1	1	0	0	1	1	2	1	1	2	1	1	1	2	1	1	1	1	1	1	1	2	2	1	1	1	1	2
23581	男	0	0	0	0	1	0	0	1	0	1	1	1	0	0	1	1	1	1	1	1	1	1	1	1	1	1	3	3	3	4	3	1	4	4	4	1	1	4	1	1	4	4	3	3	1	1	1	5
25142	女	0	0	0	0	0	0	0	0	0	1	0	0	0	0	1	1	0	1	1	1	1	1	1	1	1	1	3	2	2	4	2	1	2	2	2	1	1	4	4	2	2	2	3	1	2	1	1	3
24139	女	0	0	0	0	1	0	0	1	0	0	0	0	0	1	0	0	1	1	1	1	1	0	0	0	1	1	2	2	3	3	1	2	3	1	2	1	2	3	2	2	2	2	2	1	1	1	2	3
25103	男	0	0	0	0	1	1	0	1	0	0	0	0	0	0	1	1	1	1	1	1	1	1	1	1	1	1	3	3	4	3	2	1	1	2	2	2	1	2	2	2	2	2	2	2	3	4	2	2
23519	男	0	0	0	0	0	0	0	0	0	0	0	0	0	0	1	0	0	1	1	0	0	0	1	0	0	0	2	2	3	3	1	2	4	3	3	2	1	3	3	3	2	3	4	2	3	2	3	5
24989	男	0	0	0	0	0	0	0	0	0	0	0	0	0	0	1	1	0	1	1	1	1	1	1	1	1	1	3	3	3	3	2	2	3	2	2	2	1	1	1	1	2	2	1	1	1	1	1	2
22864	男	1	0	0	0	0	0	0	0	0	0	1	0	0	0	1	1	1	1	0	1	1	1	1	1	1	1	2	2	3	2	2	2	1	1	2	1	1	1	1	1	2	1	1	1	1	1	1	2
24696	女	0	1	0	0	0	0	0	1	0	0	0	0	0	0	1	1	1	1	1	1	1	1	1	1	1	1	4	4	4	3	1	1	1	1	3	1	1	2	2	2	3	1	2	1	1	1	1	2
24997	女	1	0	0	0	1	0	0	0	0	0	0	0	0	0	1	1	1	1	1	1	1	0	1	1	1	1	1	1	2	2	1	2	2	1	2	1	1	1	2	2	5	3	2	2	5	5	2	5
23931	男	0	0	0	0	0	0	0	0	0	0	0	0	0	0	1	1	0	0	1	1	1	0	1	0	1	0	1	1	1	1	1	1	1	1	1	1	1	1	1	1	1	1	1	1	1	1	1	2
23705	女	0	0	0	1	1	0	0	1	0	0	1	0	0	0	1	1	1	1	1	1	1	0	1	1	1	1	2	2	2	2	2	1	2	2	2	2	2	4	1	1	2	3	4	2	1	1	1	4
23950	女	1	0	0	0	0	0	0	0	0	0	0	0	0	0	1	0	1	1	0	1	1	0	1	0	1	0	4	4	3	3	2	1	4	4	3	2	4	4	4	4	4	3	4	2	2	3	3	3
23955	女	0	0	0	0	0	0	0	0	0	0	0	0	0	0	1	1	1	1	1	1	1	1	1	1	1	0	1	1	3	1	2	1	3	4	3	3	3	3	5	2	2	1	1	3	3	3	3	3
23937	女	0	0	0	0	0	0	0	0	0	0	0	0	0	0	1	1	0	1	0	1	0	0	1	1	0	0	3	1	3	3	4	3	1	3	3	3	1	1	1	3	3	4	1	1	4	1	3	3
25179	男	1	0	0	0	0	0	0	0	0	0	0	0	0	0	1	1	1	1	0	0	1	0	1	0	0	1	3	3	4	3	2	3	3	4	3	3	5	3	3	4	5	5	3	2	2	3	2	3
23309	女	0	0	0	0	0	0	0	0	0	0	0	0	0	0	1	0	0	0	0	1	0	0	0	0	0	1	1	1	2	2	2	2	1	1	2	1	1	1	1	1	1	2	2	2	3	3	2	3
23575	女	1	0	0	0	0	0	0	0	0	0	0	0	0	0	1	0	0	1	0	0	0	0	0	0	0	0	2	2	2	2	2	2	1	2	2	1	1	2	3	2	2	2	2	2	1	1	1	2
25150	男	0	0	0	0	0	0	0	0	0	0	0	0	0	0	1	0	0	1	0	0	0	0	1	0	0	0	2	2	2	2	2	1	3	2	2	3	3	4	5	2	1	3	3	1	2	2	2	2
23560	男	1	0	0	0	0	0	0	1	0	0	0	0	0	0	1	1	1	1	1	1	1	1	1	1	1	1	4	3	5	3	2	3	1	1	5	3	1	1	1	2	2	1	2	1	2	2	1	5
23056	男	0	0	0	0	0	0	0	0	0	0	0	0	0	0	1	1	0	1	1	1	1	0	1	0	1	0	2	2	2	2	2	2	1	2	2	2	1	2	1	1	1	3	3	2	1	1	1	3
27785	女	0	1	0	0	1	1	0	0	0	0	0	0	0	0	1	1	1	1	1	1	1	1	1	1	1	1	2	2	3	2	1	1	1	2	2	1	1	1	1	2	1	3	4	3	1	1	1	2
23097	男	1	0	0	0	0	0	0	0	0	0	0	0	0	0	1	0	1	1	1	1	1	1	1	1	1	1	3	3	3	3	3	4	4	3	3	4	3	1	2	1	2	1	1	1	1	1	1	2
25710	女	0	0	0	0	0	0	0	0	0	0	0	0	0	0	1	1	0	1	1	1	1	0	1	1	1	1	4	1	3	3	3	2	1	2	2	2	1	3	3	3	3	3	3	1	1	1	1	1
23044	男	1	0	0	0	1	0	0	0	0	0	0	0	0	1	1	0	1	1	1	0	0	1	0	0	1	0	3	2	2	2	2	3	1	1	4	1	1	1	2	1	2	1	1	1	1	1	1	1
23260	女	0	0	0	0	0	0	0	0	0	0	0	0	0	1	1	0	0	1	1	1	1	0	1	1	0	1	3	3	4	4	2	4	1	2	3	3	1	4	5	3	2	3	3	1	4	3	2	3
23542	男	0	0	0	0	1	1	0	0	0	0	0	0	0	0	1	1	1	1	1	1	1	1	1	1	1	1	4	2	2	2	2	1	1	3	3	1	2	2	2	3	2	3	2	2	2	2	2	3
28877	男	0	0	0	0	1	0	0	0	0	0	0	0	1	0	1	1	1	1	1	0	1	1	1	1	1	1	3	4	2	2	2	2	4	1	2	2	3	3	3	3	4	3	4	2	3	2	2	3
23307	男	1	0	0	0	0	0	0	1	0	0	0	0	0	1	1	1	1	1	1	1	1	1	1	1	1	1	5	5	4	5	5	3	4	1	3	3	1	1	1	3	5	3	4	2	3	1	4	2
23286	女	1	0	0	0	0	0	0	0	0	0	0	0	0	0	1	1	1	1	1	1	1	1	1	1	1	1	3	4	4	3	4	3	1	1	3	3	1	1	1	3	4	4	3	4	1	1	1	4
23063	女	0	1	0	0	0	0	0	0	0	0	0	0	0	0	1	0	1	0	0	1	1	1	0	1	0	1	3	1	3	2	1	3	1	1	1	1	1	1	1	2	3	1	2	1	1	1	1	1
23147	男	0	0	0	0	1	0	0	0	0	0	0	0	0	0	1	1	0	1	0	0	1	0	0	0	0	0	3	3	3	3	3	3	3	3	3	3	3	3	3	3	3	3	2	2	2	2	2	3
28891	男	0	0	0	0	0	0	0	0	0	0	0	0	0	0	1	1	1	1	1	1	1	1	1	1	1	1	3	3	4	4	3	1	3	2	4	3	1	3	3	4	3	3	3	3	2	1	1	3
23872	男	0	0	0	0	1	0	0	0	0	0	0	0	0	0	1	1	1	1	1	1	1	1	1	1	1	1	4	3	3	4	3	2	4	3	3	2	2	5	5	4	3	3	3	3	3	3	3	3
23449	男	0	0	0	0	1	0	0	0	0	0	0	0	0	0	1	1	1	1	1	1	1	1	1	1	1	1	3	2	4	3	3	3	3	2	3	2	2	2	2	3	3	3	3	3	3	3	3	4
28841	女	1	0	0	0	0	0	0	0	0	1	0	1	0	1	1	1	0	1	1	0	1	1	1	0	1	1	3	3	3	3	1	1	3	1	2	1	1	1	1	3	2	1	1	1	1	1	1	3
25759	女	1	0	0	0	0	0	0	0	0	0	0	0	0	0	1	1	1	1	1	1	1	1	1	1	1	1	3	3	3	3	1	2	2	2	2	2	2	2	2	2	2	2	2	2	2	2	2	2
28992	男	1	0	0	0	0	0	0	0	0	0	0	0	0	0	0	1	1	1	1	0	0	1	0	0	1	0	1	1	2	1	1	2	1	1	1	1	1	1	1	1	1	1	1	1	1	1	1	1
23709	男	1	0	0	0	0	0	0	0	0	0	0	0	1	0	1	1	1	1	1	1	0	0	1	0	1	0	2	3	2	2	3	2	1	1	1	2	1	1	1	2	4	1	2	1	1	1	4	3
23861	女	0	0	0	0	0	1	0	0	0	0	0	0	0	0	1	1	1	1	1	1	1	1	1	1	1	1	2	2	3	3	1	2	2	2	3	2	1	2	3	2	2	2	2	1	3	2	2	4
28628	男	0	0	0	0	1	0	0	0	0	0	0	0	0	1	1	1	1	1	1	1	1	1	1	1	1	1	3	3	4	3	2	2	5	3	4	4	2	3	2	3	4	3	3	4	5	5	5	5
28871	女	1	0	0	0	0	0	0	0	0	0	0	0	0	1	0	1	0	0	0	0	0	0	0	0	0	0	3	1	2	2	1	2	1	2	2	1	1	1	1	1	1	1	1	2	1	1	1	2
27560	女	0	0	0	0	1	0	0	0	0	0	0	0	0	0	1	0	1	1	1	0	1	0	1	1	1	1	4	5	1	3	1	1	2	1	3	3	4	5	5	4	2	4	4	2	3	1	2	2
17798	男	0	0	0	0	0	0	0	0	0	0	0	1	0	1	1	1	0	0	1	1	1	0	0	1	1	1	2	1	3	1	2	1	1	1	2	1	1	1	1	1	2	1	1	1	1	1	1	1
24693	男	1	0	0	0	1	0	0	1	0	0	0	0	0	0	1	0	0	1	1	1	1	0	0	0	1	0	2	2	2	2	1	2	2	2	2	1	1	1	2	1	2	2	2	1	2	4	1	2
17368	男	1	0	0	0	0	0	0	0	0	0	0	0	0	0	1	1	1	1	1	1	1	1	1	1	1	1	3	3	3	3	3	3	2	3	3	3	1	2	3	2	3	3	3	3	3	3	3	3
27441	男	0	0	0	0	0	0	0	0	0	0	0	0	0	0	1	1	0	1	1	1	1	1	1	0	1	0	2	3	3	4	2	1	5	2	4	3	1	1	2	2	3	2	2	1	1	1	2	4
27580	女	1	1	0	1	1	0	0	0	0	0	0	0	0	0	1	1	1	1	1	1	1	1	1	1	1	1	3	4	3	3	1	3	5	2	2	2	1	3	3	3	3	3	3	3	4	4	3	4
23885	女	0	0	0	0	0	0	0	0	0	0	0	1	0	0	0	0	0	1	0	0	1	0	1	0	0	0	1	1	2	1	1	1	1	1	1	1	1	1	1	1	2	1	1	1	1	1	1	2
27956	男	0	0	0	0	1	0	0	0	0	0	1	0	0	1	1	0	0	0	1	0	0	0	1	0	0	0	2	1	2	2	1	1	1	1	2	1	1	1	1	2	2	3	2	2	1	1	1	1
27872	男	1	0	0	0	0	0	0	0	0	0	0	0	0	0	1	1	0	1	0	1	0	0	1	0	0	1	3	3	3	3	3	1	2	3	3	3	3	3	3	3	3	3	3	3	3	3	3	3
25227	女	1	0	0	0	0	0	0	1	0	0	0	0	0	0	1	1	1	1	1	0	1	1	1	1	0	0	2	2	3	2	1	3	1	4	3	2	3	4	5	3	1	1	4	1	1	1	1	3
23661	男	1	0	0	0	0	0	0	0	0	0	0	0	0	0	0	0	0	0	0	0	0	0	0	0	0	0	2	1	2	2	1	1	2	1	1	1	1	1	1	1	2	1	1	2	2	1	1	1
26065	男	0	0	0	1	0	0	0	1	0	0	0	1	0	0	1	1	1	1	1	1	1	1	1	1	1	1	4	4	3	4	2	2	1	2	3	3	2	2	2	3	4	2	4	2	3	1	1	4
24702	女	0	0	0	0	0	0	0	0	0	0	0	0	0	0	1	1	0	0	0	1	1	0	1	0	0	0	2	3	3	3	2	4	1	1	2	1	1	4	4	3	3	3	3	2	2	1	2	3
27382	女	1	0	0	0	0	0	0	0	0	0	0	0	0	0	1	1	1	1	1	1	1	1	1	1	0	1	2	2	2	2	2	2	2	2	2	2	1	1	1	2	3	2	1	2	2	3	2	2
29130	男	1	0	0	0	0	0	0	0	0	0	1	0	0	0	1	1	0	0	1	0	1	0	0	0	0	0	1	2	2	2	1	3	2	1	4	4	1	1	3	2	2	2	2	1	2	1	1	3
28393	男	0	0	0	0	1	0	0	0	0	0	0	0	0	0	1	1	1	1	1	1	1	1	0	0	1	0	2	1	1	1	1	1	1	1	1	1	1	1	1	1	1	3	2	1	1	1	1	3
28058	女	0	0	0	0	0	0	0	0	0	0	0	0	0	0	1	1	1	1	1	1	1	1	1	1	1	1	3	3	2	2	1	2	3	2	2	2	1	1	3	1	2	2	2	3	1	1	1	3
24678	女	1	0	0	0	0	0	0	0	0	0	0	0	0	1	1	1	1	1	1	0	0	0	0	1	1	0	2	2	2	3	2	1	2	2	1	1	1	1	2	2	1	1	2	2	1	1	1	3
23963	女	0	0	0	0	0	0	0	0	0	0	0	0	0	1	1	1	1	1	1	0	1	0	1	1	1	0	2	2	2	2	2	1	4	3	2	2	1	1	1	3	4	4	2	2	2	1	1	5
25494	女	0	0	0	0	1	1	0	0	0	0	0	0	0	0	1	1	1	1	1	1	1	0	1	0	1	1	3	2	3	3	3	2	2	4	2	2	2	3	4	2	2	2	3	2	2	2	3	3
15773	男	1	0	0	0	0	0	0	0	0	0	1	1	0	1	1	1	0	1	1	0	1	1	1	0	1	1	2	1	3	2	1	2	1	2	2	1	1	1	2	2	1	1	1	1	1	1	1	2
23322	女	1	0	0	0	0	0	0	0	0	0	0	0	0	0	1	1	1	1	1	1	1	1	1	0	0	0	1	1	2	1	1	1	1	1	1	1	1	1	1	1	1	1	3	1	1	2	1	2
24538	女	0	0	0	0	0	0	0	0	0	0	0	0	0	0	1	0	0	0	0	0	1	0	1	1	1	0	2	2	2	2	2	1	2	1	2	1	1	1	1	2	2	2	1	1	1	1	1	3
29113	女	1	0	0	0	0	0	0	0	0	0	0	1	0	0	1	1	1	1	1	1	1	1	1	1	1	0	3	3	2	3	3	3	3	1	2	2	2	2	1	2	3	2	2	2	3	2	2	2
28423	女	0	0	0	0	0	0	0	0	0	0	0	0	0	0	1	1	1	1	1	0	1	0	1	1	1	0	2	3	3	3	2	1	3	3	3	2	4	2	3	2	3	3	3	2	4	5	2	4
28341	男	1	0	0	0	0	0	0	0	0	0	0	0	0	1	1	0	0	0	0	0	1	0	1	1	1	1	2	2	4	2	2	1	3	1	2	1	1	1	1	2	2	2	1	1	1	1	1	4
28210	女	0	0	0	1	1	0	0	0	0	0	0	0	0	0	0	1	1	1	1	1	1	1	1	1	1	0	2	2	2	2	2	2	2	3	2	3	4	3	5	4	4	4	4	3	3	1	2	5
28152	女	0	0	0	0	0	0	0	0	0	0	0	1	0	0	1	1	1	1	1	1	1	1	1	1	1	1	3	3	3	3	3	2	3	4	2	2	1	1	1	1	3	1	1	1	1	1	2	3
23899	男	1	1	1	0	1	1	0	0	0	0	0	0	0	0	1	1	0	0	1	0	0	0	1	0	1	0	2	3	4	2	1	2	1	3	3	2	4	3	4	4	3	4	4	2	3	3	2	4
24153	男	1	0	0	0	0	0	0	0	0	0	0	0	0	0	0	0	0	1	0	0	0	0	1	0	1	1	1	2	3	3	1	3	3	2	2	3	1	1	1	2	1	4	3	3	3	4	4	4
28062	女	0	0	0	0	0	0	0	0	0	0	1	1	0	0	1	1	1	1	1	1	1	1	1	1	1	1	4	4	3	3	3	3	3	3	4	4	4	4	4	3	4	3	3	3	3	3	1	4
28338	女	0	0	0	0	1	0	0	0	0	0	0	0	0	0	1	1	0	0	0	0	0	1	1	0	1	0	2	3	4	3	3	2	1	1	3	2	1	2	2	2	2	2	2	2	2	2	2	2
28350	女	1	0	0	0	0	0	0	0	0	0	0	0	0	0	1	1	1	1	1	0	1	0	1	1	0	0	3	2	2	2	2	3	2	2	3	2	1	1	2	2	3	5	2	3	3	4	3	5
28631	女	0	0	0	0	1	0	0	0	0	0	0	0	0	0	1	1	1	1	0	1	1	0	1	0	1	0	2	1	4	3	2	3	4	3	4	3	1	1	1	2	3	5	5	4	5	5	5	4
24796	女	0	0	0	0	0	0	0	0	0	0	1	0	0	0	1	1	1	1	1	1	1	0	1	1	1	1	3	2	4	3	2	2	2	2	2	2	1	2	3	2	4	3	3	4	3	3	1	3
28432	女	0	0	0	0	0	0	0	0	0	0	0	0	0	0	1	1	1	0	1	1	1	1	1	1	1	1	3	3	5	3	3	4	1	3	5	5	1	1	3	3	4	3	3	5	4	3	4	4
25178	女	0	0	0	0	0	0	0	1	0	0	0	0	0	0	1	1	1	1	1	1	1	0	1	1	1	1	2	2	2	2	2	2	1	2	2	2	1	1	1	1	1	1	1	2	1	1	1	2
27524	女	1	0	0	0	0	0	0	0	0	0	0	0	0	1	1	1	1	1	1	1	1	0	1	0	0	0	2	2	3	3	3	3	2	1	2	1	1	1	1	2	2	2	2	1	2	1	2	2
28163	女	0	0	0	0	1	0	0	0	0	0	0	0	0	0	1	1	0	1	1	1	1	0	1	1	1	1	3	4	3	3	2	2	3	1	2	3	1	1	3	3	2	3	3	3	1	1	4	4
28142	女	0	0	0	0	1	0	0	0	0	0	0	0	0	0	1	1	1	1	1	1	1	1	0	1	1	1	3	3	3	3	3	3	3	3	2	2	2	2	2	2	3	3	3	3	3	3	2	3
27256	女	0	0	0	0	1	0	0	0	0	0	0	0	0	0	0	0	0	0	0	0	0	0	0	0	0	0	2	1	1	2	1	1	1	1	1	1	1	1	1	1	1	1	1	1	1	1	1	1
28764	女	0	0	0	0	0	0	0	0	0	0	0	0	0	0	1	0	0	1	0	1	1	0	1	0	0	1	2	1	2	2	1	1	1	1	2	1	1	1	1	1	1	1	1	1	1	1	1	2
28396	女	0	0	0	0	0	0	0	0	0	0	0	0	0	0	0	0	0	0	0	0	0	0	1	0	0	0	1	1	1	1	1	1	1	2	1	1	1	1	2	1	2	1	1	1	1	1	1	1
27026	女	1	0	0	0	0	0	0	0	0	0	0	0	0	0	0	0	0	0	0	0	0	0	1	1	1	0	1	3	2	2	1	1	1	1	2	1	1	1	1	1	2	1	2	1	1	1	2	1
28555	女	0	0	0	0	1	0	0	0	0	0	0	0	0	0	0	0	0	0	0	0	0	0	1	0	0	0	2	5	2	2	2	1	1	1	2	1	1	3	4	2	3	3	2	1	3	1	1	1
28286	女	0	0	0	0	1	0	0	0	0	0	0	0	0	0	0	0	0	0	0	0	0	0	0	0	0	0	2	1	2	1	1	2	1	2	2	1	1	1	1	1	2	2	2	1	1	1	1	2
15407	女	1	0	0	0	0	0	0	0	0	0	0	0	0	0	1	1	1	1	1	1	1	1	1	0	1	1	2	1	3	3	2	2	3	3	3	2	1	2	3	2	2	3	2	2	3	2	2	3
28601	女	0	0	0	0	0	0	0	0	0	0	0	0	0	0	0	0	0	0	0	0	0	0	0	0	0	0	2	2	2	2	1	1	1	2	2	1	1	1	2	2	2	2	2	1	1	1	1	2
28747	女	0	0	0	0	0	0	0	0	0	0	0	0	0	0	0	0	0	1	0	0	0	0	1	0	0	0	2	1	2	2	1	1	1	1	2	1	1	1	1	1	1	1	1	1	1	1	1	1
28512	女	0	0	0	0	0	0	0	0	0	0	0	0	0	0	1	1	1	1	0	0	0	0	1	0	0	0	4	3	4	4	3	3	3	2	3	2	1	1	1	3	4	3	4	3	3	2	1	3
27816	女	0	1	1	1	1	0	0	0	0	0	0	0	0	0	0	0	0	0	0	0	0	0	0	0	0	0	2	2	2	3	1	1	1	2	3	1	1	3	4	3	2	3	2	2	1	1	1	2
28573	女	0	0	0	0	1	0	0	0	0	0	0	0	0	0	1	0	1	0	0	0	0	0	0	0	0	0	1	1	1	1	1	2	1	1	3	1	1	1	2	1	1	2	1	2	1	1	1	2
14180	女	0	0	0	0	0	0	0	0	0	0	0	0	0	0	1	1	0	0	0	0	0	0	1	1	1	0	3	3	4	4	3	3	3	3	3	3	3	3	4	3	4	4	4	3	3	3	3	3
28446	女	0	0	0	0	0	0	0	0	0	0	0	0	0	0	0	1	0	0	0	0	0	0	1	0	0	0	2	3	2	2	1	1	2	1	1	1	1	1	1	1	1	1	1	1	1	1	1	1
28261	女	1	0	0	0	1	0	0	0	0	0	0	0	0	0	1	1	0	1	1	0	1	1	1	1	1	1	3	3	4	3	2	2	4	3	4	3	1	4	4	3	3	4	3	3	1	1	1	3
14185	女	0	0	0	0	1	0	0	0	0	0	0	0	0	1	1	1	1	1	0	0	0	0	1	0	0	1	3	4	4	4	3	3	2	3	3	2	1	1	2	1	2	2	2	1	1	1	1	4
28328	女	0	0	0	0	0	0	0	0	0	0	0	0	0	0	0	0	0	0	0	0	0	0	1	1	0	1	2	2	4	2	2	1	1	2	2	2	1	1	2	3	3	3	2	3	1	1	1	2
14363	男	1	0	0	0	0	0	0	0	0	0	0	0	0	0	1	1	0	0	1	0	1	1	0	0	1	1	4	2	2	2	2	4	1	1	2	3	3	4	2	2	1	2	4	2	2	2	2	3
14145	男	0	0	0	0	0	0	0	0	0	0	0	0	0	0	1	1	1	1	1	1	1	0	1	1	1	1	3	4	5	1	1	2	4	2	4	1	1	1	1	1	3	5	2	2	2	1	1	2
27844	男	1	0	0	0	0	0	0	0	0	0	0	0	0	0	0	0	0	0	0	0	0	0	0	0	0	0	1	1	2	1	1	1	1	2	3	1	1	1	1	1	1	1	1	1	1	1	1	1
27384	女	0	0	0	0	1	0	0	0	0	0	0	0	0	0	0	0	0	0	0	0	0	0	0	0	0	0	2	1	2	3	1	2	1	2	2	2	1	1	1	2	2	4	3	2	2	2	2	3
27390	女	0	0	0	0	0	0	0	0	0	0	1	0	1	0	1	0	1	0	0	1	0	0	1	1	0	1	1	1	2	2	1	1	1	1	2	1	1	2	1	1	1	2	2	2	1	1	1	2
15418	女	1	0	0	0	0	0	0	0	0	0	0	0	0	0	1	0	1	1	0	1	1	0	1	1	1	0	3	4	3	4	4	3	1	1	3	1	1	4	1	4	4	4	4	3	4	1	1	3
13659	女	0	0	0	0	0	0	0	0	0	0	0	0	0	0	1	1	1	1	1	1	1	1	1	1	1	1	3	3	3	3	2	3	3	3	3	3	1	3	2	3	3	3	3	2	3	2	2	3
16717	女	0	0	0	0	0	0	0	0	0	0	0	0	0	0	1	1	0	0	0	0	1	1	1	1	0	0	2	2	3	3	3	2	2	3	3	2	4	4	4	2	2	2	2	2	2	2	2	2
25868	女	1	0	0	0	0	0	0	0	0	0	0	0	0	0	1	1	1	1	1	1	1	1	1	1	1	1	4	1	3	2	2	3	3	1	3	1	1	1	3	2	3	2	2	3	1	1	1	3
14478	女	1	0	0	0	0	0	0	0	0	0	0	0	0	1	1	1	1	1	1	0	0	1	0	1	1	0	3	3	3	3	3	3	2	3	2	2	3	3	4	2	2	2	3	2	3	2	2	2
15301	女	0	1	1	1	0	0	0	0	0	0	0	0	0	1	1	1	1	0	1	1	1	1	1	1	1	1	3	3	4	4	3	1	3	3	3	3	3	3	3	3	3	3	3	3	1	1	1	1
27902	女	0	0	0	0	1	0	0	0	0	0	0	0	0	0	1	1	1	1	1	1	1	0	0	1	1	1	3	4	3	3	3	3	2	3	3	2	1	2	2	3	3	4	3	2	2	4	2	4
27307	女	1	0	1	0	1	0	0	0	0	0	0	0	0	0	1	0	1	0	0	1	0	1	0	1	0	0	2	2	3	3	2	2	2	2	3	3	1	1	4	1	2	2	1	2	1	1	1	3
27202	女	0	0	0	0	0	0	0	0	0	0	0	0	0	0	1	0	0	1	0	0	1	1	0	1	0	0	3	2	2	2	3	2	2	2	3	2	2	2	3	2	2	2	3	1	2	2	2	3
27203	女	0	0	0	0	0	0	0	0	0	0	0	0	0	0	0	0	0	0	0	0	0	0	0	0	0	0	3	2	2	2	1	2	2	1	2	1	1	1	1	1	2	1	2	2	2	1	1	2
26287	女	0	0	0	0	0	0	0	0	0	0	0	0	0	0	0	0	0	0	0	0	0	0	0	0	0	0	1	1	2	2	2	1	1	1	1	1	1	1	1	1	1	2	3	1	1	2	1	1
23530	女	1	0	0	0	0	0	0	0	0	0	0	0	0	0	1	0	0	1	0	0	0	0	0	0	0	0	2	2	1	1	1	1	1	1	1	1	1	1	1	2	2	3	1	2	1	1	1	2
15215	女	1	0	0	0	0	0	0	0	0	0	0	0	0	0	1	1	0	1	1	1	1	1	1	0	1	0	2	3	3	3	1	3	3	3	2	2	4	3	3	3	3	3	3	3	3	3	2	3
28602	男	1	0	0	0	0	0	0	0	0	0	0	0	0	0	1	0	0	0	0	0	0	0	0	0	0	0	1	1	2	2	1	1	2	2	2	2	2	3	3	2	2	2	2	1	1	2	2	2
23429	男	1	0	0	0	1	0	0	0	0	0	0	0	0	0	1	1	1	1	1	0	1	1	1	1	1	0	2	1	1	1	1	2	1	1	1	1	1	1	1	1	1	1	1	2	1	1	1	2
14393	女	0	0	0	0	1	0	0	0	0	0	0	0	0	0	1	0	0	1	1	0	0	1	1	0	1	0	4	4	4	3	3	2	4	2	3	1	1	2	3	4	3	4	2	2	1	1	2	4
25732	女	0	0	0	0	0	0	0	0	0	0	0	0	0	0	0	0	0	0	0	0	0	0	0	0	0	0	2	1	2	2	1	2	1	1	2	1	1	1	3	2	2	1	1	2	1	1	1	1
27001	女	1	0	0	0	0	0	0	0	0	0	0	0	0	0	1	0	1	1	0	0	1	1	1	0	0	0	2	1	3	3	2	2	3	2	2	2	1	4	4	4	2	2	2	3	4	3	2	3
27022	女	0	0	0	0	1	0	0	0	0	0	0	0	0	0	1	0	1	1	0	0	0	0	1	0	0	0	3	4	3	3	3	1	1	1	2	2	1	1	1	3	3	3	2	3	1	1	1	3
27348	女	0	0	0	0	0	0	0	0	0	0	0	0	0	0	0	0	0	1	0	0	0	0	1	1	0	0	2	2	2	2	1	1	1	1	2	1	1	1	2	1	2	1	1	3	1	1	1	3
26069	女	0	0	0	0	0	0	0	0	0	0	0	0	0	0	1	0	0	1	0	1	0	1	1	1	1	1	2	3	3	3	1	1	1	1	1	1	1	1	1	1	2	1	1	1	1	1	1	1
27338	女	0	0	0	0	1	0	0	0	0	0	0	0	0	0	1	0	0	1	0	0	0	0	1	0	0	0	2	1	3	2	1	1	1	3	2	2	3	2	3	3	1	2	3	2	3	3	1	2
26975	女	1	0	0	0	1	0	0	0	0	0	0	0	0	1	1	1	0	1	0	0	0	0	0	0	1	1	2	3	2	4	1	2	4	3	2	1	1	3	4	1	3	4	4	1	2	2	2	3
14081	男	1	0	0	0	0	0	0	0	0	0	0	0	0	0	1	1	1	1	1	1	1	1	1	1	1	1	1	1	1	1	2	2	2	2	2	2	2	2	2	2	2	2	2	2	2	2	2	2
15484	男	0	0	0	0	1	0	0	0	0	0	0	0	0	0	1	1	0	1	1	1	1	1	1	1	1	1	4	3	2	2	2	1	4	3	4	3	1	1	5	1	3	1	1	1	1	1	1	1
14130	女	0	0	0	0	0	0	0	0	0	0	0	0	0	0	1	1	1	1	1	1	1	1	1	1	1	1	3	3	3	3	3	2	3	3	3	3	3	4	4	2	3	3	3	3	3	1	3	3
26201	女	0	0	0	0	0	0	0	0	0	0	0	0	0	0	1	1	0	1	1	1	0	0	0	0	0	0	2	2	2	3	2	1	1	2	3	1	1	1	2	3	1	2	3	1	2	1	1	1
28516	女	1	0	0	0	0	0	0	0	0	0	0	0	0	0	1	0	1	0	0	0	0	0	1	0	0	1	2	2	2	2	2	2	3	2	2	1	1	1	1	1	2	1	2	2	3	1	1	2
26204	男	1	1	0	0	0	0	0	0	0	0	0	0	0	0	1	1	0	1	1	0	1	1	1	1	1	1	2	2	2	3	2	1	3	2	2	2	1	1	1	2	2	2	2	2	2	2	2	2
15268	女	0	0	0	0	1	0	0	0	0	0	0	0	0	0	1	0	0	1	0	1	0	0	1	1	1	0	2	2	2	3	2	2	1	1	2	2	2	2	2	2	2	2	2	2	2	2	1	3
14548	女	0	0	0	0	0	0	0	0	0	0	0	0	0	0	0	1	1	1	1	1	1	1	1	1	1	1	3	4	4	4	3	4	5	2	3	4	1	1	1	1	2	2	4	4	4	1	1	1
25694	女	0	0	0	0	1	0	0	0	0	0	0	0	0	0	0	0	0	1	0	0	0	0	1	0	0	0	2	2	3	1	1	1	1	1	2	1	1	1	1	1	1	3	1	1	1	1	1	1
25897	女	0	0	0	0	0	0	0	0	0	0	0	0	0	0	1	1	0	1	0	1	0	0	0	0	0	0	2	2	2	2	1	1	1	1	1	1	1	1	4	2	2	1	2	2	2	2	2	2
25687	女	1	0	0	0	0	0	0	0	0	0	0	0	0	0	1	0	0	0	0	0	0	0	0	1	0	0	2	1	2	2	1	1	1	2	2	1	1	1	1	1	1	1	1	1	1	1	1	1
23916	男	0	1	0	0	0	0	0	0	0	0	0	0	0	0	0	0	0	0	0	0	0	0	0	0	0	0	2	2	2	2	2	1	2	2	3	3	4	3	3	2	2	2	3	2	3	2	2	3
14568	男	1	0	0	0	0	0	0	0	0	0	0	0	0	0	1	1	0	0	1	1	0	0	1	0	0	0	3	1	3	1	1	1	1	3	3	1	1	1	1	1	1	1	1	1	1	1	1	1
14094	女	1	0	0	0	0	0	0	0	0	0	0	0	0	0	1	1	1	1	1	1	1	1	1	1	1	1	4	4	4	4	4	4	4	2	4	4	1	1	1	1	4	1	1	1	2	1	1	4
26802	女	0	0	0	0	0	0	0	0	0	0	0	0	0	0	0	0	0	0	0	0	0	0	1	0	0	0	2	2	2	2	1	2	1	2	2	1	1	3	3	2	2	1	3	2	1	1	1	2
14877	女	1	0	0	0	0	0	0	0	0	0	0	0	0	0	1	1	0	1	1	0	1	0	1	1	1	0	2	2	2	3	2	4	3	4	3	2	3	2	2	3	4	2	2	2	2	3	2	2
15769	女	0	0	0	0	0	0	0	0	0	0	0	0	0	0	1	1	0	0	0	1	1	0	0	1	1	0	3	3	3	3	1	1	3	2	3	1	1	1	1	1	2	2	4	1	1	1	1	3
13862	女	0	0	0	0	1	0	0	0	0	0	0	0	0	0	1	1	1	1	1	1	1	1	1	1	1	1	3	3	2	2	2	3	4	2	3	2	1	1	1	1	3	4	3	4	4	1	1	4
26062	女	0	0	0	0	0	0	0	0	0	0	0	0	0	0	0	0	0	0	0	0	0	0	1	0	0	0	2	3	2	2	1	2	3	2	2	2	4	4	5	1	3	1	2	2	3	2	2	2
15768	女	1	0	0	0	0	0	0	1	0	0	0	0	1	1	1	1	0	1	1	0	1	1	1	1	0	1	3	2	2	2	3	1	2	3	3	2	1	2	1	2	2	1	1	1	2	1	1	3
25631	女	0	0	0	0	0	0	0	0	0	0	0	0	0	0	1	0	1	0	0	0	0	0	0	0	0	0	2	2	3	2	1	2	1	1	2	1	1	1	1	3	2	1	2	2	2	1	2	2
26562	女	1	0	0	0	0	0	0	0	0	0	0	0	0	0	1	0	1	0	0	0	0	0	0	0	0	0	2	1	2	2	1	1	2	1	2	1	1	1	2	1	2	1	1	1	2	1	1	1
26901	女	1	0	0	0	0	0	0	0	0	0	1	1	0	0	0	0	0	1	0	0	0	0	1	0	0	0	3	2	1	3	2	2	2	1	2	2	1	2	2	2	2	1	1	1	1	1	1	1
26264	女	0	0	0	0	0	0	0	0	0	0	0	0	0	0	0	0	0	1	0	0	0	0	1	0	1	0	2	1	3	3	1	1	1	3	3	2	1	2	1	2	3	1	2	3	1	1	1	2
27590	女	1	0	0	0	0	0	0	0	0	0	0	0	0	0	1	0	1	0	0	0	0	0	1	0	0	0	2	2	4	3	1	1	1	2	2	1	1	2	2	3	3	1	2	2	2	2	2	3
26028	女	0	1	0	1	1	0	1	1	0	0	0	0	0	0	1	0	0	1	0	1	1	1	1	1	1	0	2	2	3	3	2	2	1	1	2	1	1	1	2	1	1	3	3	2	1	1	1	2
23219	女	1	0	0	0	0	0	0	0	0	0	0	0	0	0	1	1	0	1	0	1	1	1	1	1	1	0	3	3	4	3	3	2	2	3	3	3	3	3	3	2	3	3	2	3	3	3	3	4
15435	女	0	0	0	0	0	0	1	0	0	0	0	0	0	0	1	1	1	1	1	1	1	1	0	1	0	0	2	2	2	2	2	1	2	1	1	1	1	1	1	1	1	2	2	2	2	2	2	3
26117	女	1	0	0	0	1	0	0	0	0	0	0	0	0	0	1	1	1	1	0	0	0	0	1	1	1	0	3	4	3	3	1	2	2	1	2	2	1	1	3	2	3	3	1	1	1	1	1	1
14172	女	0	0	0	0	0	0	0	0	0	0	0	0	1	1	1	1	1	1	1	1	1	1	1	1	1	1	4	4	5	5	3	4	4	4	4	4	4	4	4	4	4	4	4	4	4	4	4	4
14085	女	1	0	0	0	0	0	0	0	0	0	0	1	0	1	1	1	1	1	1	1	0	1	1	1	1	1	2	2	3	1	1	1	3	3	3	2	2	3	3	3	3	2	2	2	3	3	3	2
26147	男	0	0	0	0	0	0	0	0	0	0	0	0	0	0	1	0	0	0	0	0	0	0	1	0	0	0	2	2	2	2	1	1	1	1	1	1	1	1	1	1	1	1	1	1	1	1	1	1
25860	男	1	0	0	0	0	0	0	0	0	0	0	0	0	0	0	0	0	0	0	0	0	0	0	0	0	0	2	2	2	2	1	2	2	2	2	2	2	2	2	2	2	2	2	2	2	2	2	2
25652	男	0	0	0	0	0	0	0	0	0	0	0	0	0	0	0	0	0	0	0	0	0	0	0	0	0	0	2	3	3	3	3	2	2	3	3	3	3	3	2	2	2	2	2	2	2	2	2	2
27199	男	0	0	0	0	0	0	0	0	0	0	0	0	0	0	1	1	1	0	0	0	0	0	0	0	0	0	2	1	3	1	2	1	1	1	2	2	1	1	1	2	2	2	3	1	2	3	3	3
27206	女	0	0	0	0	0	0	0	0	0	0	0	0	0	0	0	0	0	0	0	0	0	0	0	0	0	0	2	1	3	2	1	1	1	3	3	1	1	1	2	2	2	1	2	2	2	1	1	3
14412	女	1	0	0	0	0	0	0	0	0	0	0	0	0	0	1	1	1	1	1	1	1	1	1	1	1	1	4	4	3	4	1	2	5	3	2	2	1	1	1	1	2	3	4	2	3	4	2	4
14536	女	0	1	0	0	0	0	0	1	0	0	0	0	1	0	1	1	1	1	1	1	1	1	1	1	1	1	3	2	2	3	4	3	4	2	3	1	1	1	1	1	2	3	4	2	1	1	1	3
26831	女	0	0	0	0	0	0	0	0	0	0	0	0	0	0	1	1	1	0	1	1	1	0	1	0	0	1	2	2	3	4	1	1	1	1	2	1	1	1	1	1	1	1	1	1	1	1	1	2
14519	女	1	0	0	0	0	0	0	0	0	0	0	0	0	0	1	1	1	1	1	1	1	1	1	1	1	1	2	2	2	2	2	2	2	3	3	1	1	1	1	1	2	1	1	1	1	1	1	1
14540	女	1	0	0	0	0	0	0	0	0	0	0	0	0	0	0	1	1	1	1	1	1	1	1	1	1	1	2	2	2	2	2	3	2	2	2	2	2	2	2	2	1	2	3	4	3	3	3	2
26843	女	0	0	0	0	0	0	0	0	0	0	0	0	0	0	1	0	1	1	1	1	1	1	1	1	1	1	2	2	2	3	2	2	2	1	2	3	2	1	2	2	2	1	1	2	3	1	1	2
23568	男	0	0	0	0	0	0	0	0	0	0	0	0	0	0	1	0	0	0	1	0	0	0	1	0	0	1	2	2	2	2	2	2	2	2	2	2	2	2	4	2	2	3	3	3	3	2	2	2
13647	男	0	0	0	0	0	0	0	0	0	0	0	0	0	0	1	0	1	1	1	1	1	1	1	1	1	1	3	3	4	4	2	2	4	2	2	4	1	1	4	2	3	2	4	2	1	1	1	4
27387	男	0	1	0	0	0	0	0	0	0	0	0	0	0	0	1	0	0	0	0	0	0	0	1	0	0	0	1	1	1	1	1	1	1	1	1	1	1	1	1	1	1	1	1	1	1	1	1	1
25127	男	1	0	0	0	1	0	0	0	0	0	1	0	0	0	1	0	1	1	0	1	1	1	0	0	1	0	2	1	2	2	2	1	2	2	2	2	1	1	2	2	2	2	1	2	2	2	2	2
27268	女	0	0	0	0	0	0	0	0	0	0	0	0	0	0	0	0	0	0	0	0	0	0	0	0	0	0	1	1	1	2	1	1	1	1	1	1	1	1	1	1	1	1	1	1	1	1	1	1
26253	女	0	0	1	0	1	1	0	0	0	0	0	0	0	0	1	1	1	1	1	1	1	1	1	1	1	1	3	2	3	3	2	2	1	2	3	2	1	1	3	2	3	4	2	2	1	1	1	2
26477	女	0	0	1	0	1	0	0	1	0	0	0	0	0	0	0	0	0	0	0	0	0	0	0	0	0	0	2	1	2	2	1	1	1	1	1	1	1	1	3	1	1	3	1	1	1	1	1	3
25184	女	0	0	0	0	0	0	0	0	0	0	0	0	0	0	0	0	0	0	0	0	0	1	0	1	0	0	1	1	2	1	2	1	1	2	1	1	1	1	1	1	1	2	1	1	1	1	1	1
13900	女	1	0	0	0	0	0	0	0	0	0	1	0	0	0	1	1	1	0	1	0	0	1	1	1	0	0	1	2	3	1	1	2	1	1	3	1	1	1	1	1	1	1	1	2	1	1	1	5
25705	女	0	0	0	0	0	0	0	0	0	0	0	0	0	0	1	0	0	0	0	0	0	0	0	0	0	0	1	1	1	2	1	1	1	1	1	1	1	1	1	1	1	1	1	1	1	1	1	1
23801	女	1	0	0	0	0	0	0	0	0	0	0	0	0	0	1	0	0	0	0	0	0	0	1	0	0	0	2	1	2	1	1	1	1	1	1	1	1	1	1	1	1	2	1	1	2	1	1	1
28194	男	1	1	1	0	1	1	0	0	0	0	0	0	0	0	1	1	0	0	0	0	0	0	1	0	0	1	2	2	2	2	2	2	2	2	2	2	2	2	1	1	1	1	2	2	3	2	2	1
26726	男	0	0	0	0	1	0	0	0	0	0	0	0	0	0	1	0	0	1	0	1	1	1	0	1	0	0	2	1	1	2	2	2	4	2	1	1	1	2	1	1	2	2	1	1	1	1	1	2
26734	男	0	1	0	0	1	0	0	0	0	0	0	0	0	0	0	0	0	0	0	0	0	0	1	0	0	0	3	3	3	3	2	2	1	2	3	2	1	1	1	1	2	2	2	4	1	1	1	3
27220	女	1	0	0	0	0	0	0	0	0	0	0	0	0	0	1	0	1	0	0	0	0	1	1	0	0	0	3	3	1	1	3	2	1	1	1	1	1	1	1	1	1	1	1	1	1	1	1	1
26600	女	1	0	0	0	0	0	0	0	0	0	0	1	1	0	0	0	1	0	0	0	0	0	0	0	0	1	2	2	3	2	1	2	1	1	2	2	1	2	3	2	2	1	1	2	1	1	1	1
27208	女	1	0	0	0	0	0	0	0	0	0	0	0	0	0	0	0	0	0	0	0	0	0	1	0	0	0	3	3	3	3	1	1	1	2	2	1	1	1	1	2	3	2	1	3	1	1	1	2
27371	女	0	0	0	0	0	0	0	0	0	0	1	0	0	0	0	0	1	0	0	0	0	0	1	0	0	0	1	1	1	1	1	1	1	1	1	1	1	1	1	2	1	1	1	1	1	1	1	1
27041	女	1	0	0	0	0	0	0	0	0	0	0	0	0	0	0	0	0	0	0	0	0	0	0	0	0	0	2	2	3	2	2	2	1	1	2	1	1	1	1	1	2	2	2	2	1	1	1	2
27043	女	0	0	0	0	0	0	0	0	0	0	0	0	0	0	1	1	0	1	1	1	1	1	1	1	1	0	2	1	1	2	2	3	2	2	3	1	1	2	1	1	2	3	2	1	1	1	1	3
14357	女	0	0	0	0	0	0	0	0	0	0	0	0	0	0	1	1	1	1	0	1	0	0	1	1	1	0	4	4	3	4	4	2	3	3	2	2	1	4	5	3	3	3	3	3	3	3	3	3
28401	女	0	0	0	0	0	0	0	0	0	0	0	0	0	0	1	1	0	1	1	1	1	1	1	1	1	1	3	3	3	3	3	3	3	3	3	3	3	3	3	3	3	3	3	3	5	3	3	3
27403	女	0	0	0	0	0	0	0	0	0	0	0	0	0	0	1	1	1	1	1	1	1	0	1	0	0	1	1	1	1	1	2	1	1	1	2	2	1	1	1	1	1	1	1	1	1	1	1	3
27231	女	0	0	0	0	0	0	0	0	0	0	0	0	0	0	0	0	0	1	0	0	0	0	0	0	0	0	1	1	2	2	1	1	1	1	1	1	1	1	1	1	1	1	1	1	1	1	1	1
27222	女	0	0	0	0	0	0	0	1	0	0	0	0	0	0	1	1	0	1	1	1	1	0	0	0	1	0	3	2	3	3	4	2	1	2	4	2	1	2	1	1	2	2	3	2	2	1	1	4
25749	女	0	0	0	0	1	1	0	1	0	0	0	0	0	0	0	0	0	0	0	0	0	0	0	0	0	0	3	1	1	1	1	1	1	1	1	1	1	1	1	1	1	1	1	1	1	1	1	1
27152	女	0	0	0	0	0	0	0	0	0	0	0	0	0	0	1	1	0	0	0	0	0	0	0	0	0	0	2	2	2	2	1	2	2	1	1	1	1	1	1	1	1	2	2	1	1	1	1	1
14334	女	1	0	0	0	0	0	0	0	0	0	1	0	1	0	1	1	1	1	1	1	1	1	1	1	1	1	2	2	3	3	3	4	2	2	3	2	2	3	4	1	2	2	2	1	1	1	1	2
27272	女	1	0	0	0	0	0	0	0	0	0	0	0	0	0	0	0	0	1	0	0	1	0	1	0	0	0	2	2	2	2	3	2	1	1	2	1	1	1	1	2	1	1	1	1	1	1	1	2
27021	女	0	0	0	0	0	0	0	0	0	0	0	0	0	0	1	0	0	0	0	1	0	0	1	0	0	0	1	1	2	2	2	1	1	2	2	1	1	1	2	2	2	1	1	1	2	1	1	2
15339	女	1	1	1	0	0	0	1	0	0	0	0	0	0	0	1	0	1	1	0	1	1	1	1	1	0	1	3	3	4	4	3	1	3	1	3	3	1	2	3	3	3	2	3	1	4	4	2	5
27308	女	1	0	0	0	0	0	0	0	0	0	0	0	0	0	1	1	0	0	0	0	1	1	1	1	0	0	3	4	2	3	2	2	3	3	3	2	3	3	4	3	2	3	3	3	4	4	3	3
14385	女	0	0	0	0	1	0	0	0	0	0	0	0	0	0	0	1	0	1	1	1	1	1	1	1	1	1	3	3	3	3	3	3	3	3	3	3	1	1	1	1	2	3	3	3	3	3	3	3
24750	男	0	0	0	0	0	0	0	0	0	0	0	0	0	0	1	0	0	0	0	0	0	0	0	0	0	0	2	2	2	2	2	3	2	2	2	2	1	1	1	1	2	1	1	1	1	1	1	2
27126	男	1	0	0	0	0	0	0	0	0	0	0	0	0	0	1	1	0	1	0	1	1	0	1	0	1	1	1	2	2	2	1	2	2	1	2	1	1	2	2	1	2	2	1	1	2	1	1	2
23580	男	0	0	0	0	0	0	0	0	0	0	0	0	0	0	1	1	0	1	0	0	0	1	1	0	0	0	4	3	3	2	2	1	3	1	1	1	1	1	1	2	3	2	1	3	5	5	2	3
26976	男	1	0	0	0	0	0	0	0	0	0	0	0	0	0	1	1	1	1	0	1	0	0	0	0	1	1	2	2	2	2	2	1	3	1	1	1	1	1	1	1	1	1	1	1	1	1	1	2
27131	男	0	0	0	0	0	0	0	0	0	0	0	0	0	0	1	0	0	0	0	0	0	0	0	0	0	0	2	3	3	4	2	1	2	3	2	1	4	4	4	2	3	2	2	2	4	3	4	4
25620	男	1	0	0	0	0	0	0	0	0	0	0	0	0	0	0	0	0	0	0	0	0	0	0	0	0	0	1	1	1	1	1	1	1	1	1	1	1	1	1	1	1	1	1	1	1	1	1	1
14024	女	0	1	0	0	0	1	0	0	0	0	0	0	0	0	1	1	0	0	1	1	0	0	1	0	0	0	2	1	2	2	2	2	1	1	2	2	1	1	2	2	2	2	2	2	3	3	2	2
27201	女	1	0	0	0	0	0	0	0	0	0	0	0	0	0	1	0	0	0	0	0	0	0	0	0	0	0	2	2	2	2	1	1	1	1	1	1	1	3	4	2	1	1	2	2	2	1	1	1
26819	女	1	0	0	0	0	0	0	0	0	0	0	0	0	0	1	0	1	0	0	0	0	0	0	0	0	0	2	2	2	3	3	1	1	1	1	1	2	2	3	1	2	3	3	2	1	3	2	1
26801	女	0	0	0	0	0	0	0	0	0	0	0	0	0	0	1	0	0	0	0	1	1	1	1	1	1	1	1	1	2	2	2	2	2	2	2	2	1	1	1	2	2	1	1	1	1	1	1	2
27279	女	0	0	0	0	0	0	0	0	0	0	0	0	0	0	1	0	0	1	1	1	1	0	0	0	0	0	2	1	2	1	2	2	1	1	1	1	1	1	1	2	2	2	2	1	1	1	1	1
14033	女	1	0	0	0	0	0	0	0	0	0	0	0	0	0	1	1	1	1	1	1	1	0	1	0	1	1	3	3	3	3	3	3	3	2	4	3	1	1	1	2	3	3	1	3	3	3	3	3
15944	女	0	0	0	0	0	0	0	0	0	0	0	0	0	0	1	1	1	1	1	1	1	1	1	1	1	1	3	3	2	4	2	3	1	2	3	1	1	3	1	5	3	3	2	4	3	2	4	4
25802	女	0	0	0	0	0	0	0	0	0	0	0	0	0	0	1	1	0	1	0	0	1	0	1	1	1	1	1	1	3	4	3	2	4	3	3	4	2	3	4	3	3	2	3	3	1	1	1	3
27205	男	1	0	0	0	0	0	0	0	0	0	0	0	0	0	0	0	0	0	0	0	0	0	0	0	0	0	1	1	1	1	1	1	1	1	1	1	1	1	1	1	1	1	1	1	1	1	1	1
17774	男	1	0	0	0	0	0	0	0	0	0	0	0	0	0	1	1	1	1	1	0	0	0	1	0	1	0	3	3	4	3	3	3	3	1	3	2	1	3	3	3	4	2	2	1	1	1	1	2
27251	女	0	0	0	0	0	0	0	0	0	0	0	0	0	0	1	0	0	0	0	0	0	0	0	0	0	0	2	1	2	1	2	2	1	1	2	1	1	1	1	1	1	1	1	1	1	1	1	1
26002	女	0	0	0	0	1	0	0	0	0	0	0	0	0	0	0	0	0	0	0	0	0	0	0	0	0	0	2	2	2	2	3	1	1	1	2	1	1	1	1	2	3	4	1	2	3	4	2	2
26602	女	0	0	0	0	1	0	0	0	0	0	0	0	0	0	0	1	0	1	0	1	0	0	1	1	0	0	2	2	2	2	2	2	2	3	3	3	4	4	4	2	3	4	4	2	3	1	1	1
14663	女	0	1	0	1	0	0	0	0	0	0	0	0	0	0	1	1	1	1	1	0	0	0	0	1	0	0	2	1	3	3	2	3	3	3	3	2	1	1	3	2	3	3	2	4	4	3	3	3
25858	女	0	0	0	0	0	0	0	0	0	0	0	0	0	0	1	0	1	1	0	1	1	0	1	0	1	0	2	2	3	3	1	1	2	2	2	2	2	2	2	3	3	3	2	2	3	2	3	3
14400	女	1	0	0	0	0	0	0	1	1	0	1	0	0	0	1	1	1	1	1	0	1	1	1	1	1	1	3	2	2	2	2	4	4	1	2	1	1	1	1	1	4	1	4	1	3	1	1	3
27401	女	0	0	0	0	0	0	0	0	0	0	0	0	0	0	1	0	1	0	0	0	0	0	0	0	0	0	2	1	1	2	1	1	2	1	1	1	1	1	1	1	1	1	1	1	1	1	1	1
14488	女	0	0	0	0	0	0	0	0	0	0	0	0	0	0	1	1	0	1	1	1	1	1	1	1	1	1	2	2	2	3	3	4	3	3	3	3	4	3	3	3	3	3	3	2	3	3	3	3
14487	女	0	0	0	0	0	0	0	0	0	0	0	0	0	0	0	1	0	0	1	0	0	1	0	0	0	1	3	1	3	3	3	2	3	3	3	2	2	3	3	3	3	3	2	2	3	3	3	3
27209	女	0	0	0	0	0	0	0	0	0	0	0	0	0	0	0	0	1	0	0	1	0	0	0	0	0	0	1	1	2	2	1	1	1	1	2	1	1	1	1	2	2	1	1	1	2	1	1	2
26537	女	0	1	0	1	1	0	0	0	0	0	0	0	0	0	1	1	1	1	1	0	1	0	0	0	1	1	2	1	2	1	2	1	2	1	2	1	1	1	1	1	1	2	2	2	1	1	1	1
14228	女	0	0	0	0	0	0	0	0	0	0	0	0	0	0	1	1	0	1	0	1	0	1	1	0	0	0	2	2	2	2	1	3	3	3	3	2	4	4	5	3	3	3	3	3	3	3	3	3
13651	女	1	0	1	0	0	0	0	0	0	0	0	1	0	0	1	1	0	1	1	1	0	1	0	1	0	1	5	5	3	3	2	2	2	2	2	2	2	2	2	2	2	2	2	2	2	2	2	2
13990	女	0	0	0	0	0	0	0	1	0	0	1	0	0	0	0	1	0	0	0	1	0	0	0	1	0	0	3	3	2	3	2	3	3	3	3	3	3	3	3	3	3	3	2	1	2	3	4	3
27062	女	0	0	0	0	0	0	0	0	0	0	0	0	0	0	1	1	1	1	1	0	0	0	0	1	0	0	3	1	2	2	1	1	2	1	2	1	1	1	1	1	1	1	1	1	1	1	1	2
13899	女	0	1	0	0	0	0	0	1	0	0	0	0	0	1	0	1	0	1	1	1	1	1	1	1	1	1	4	5	4	4	4	2	3	1	3	3	1	1	1	3	3	3	4	3	4	2	2	4
13879	女	0	0	0	0	1	0	0	0	0	0	0	1	0	1	1	1	1	1	1	1	1	1	1	0	1	1	3	2	4	3	2	2	2	3	3	2	2	3	3	2	3	3	2	1	1	1	1	2
24826	女	0	0	0	0	0	0	0	0	0	0	0	0	0	0	1	0	1	0	1	1	1	0	1	0	0	0	2	2	2	2	2	4	3	5	3	3	3	4	5	3	2	1	4	2	2	3	2	4
27328	男	0	0	0	0	0	0	0	0	0	0	0	0	0	0	0	0	0	0	0	0	0	0	0	0	0	0	2	2	3	1	2	2	3	1	2	1	1	1	2	2	2	1	1	1	1	1	1	3
27141	男	1	0	0	0	0	0	0	0	0	0	0	0	0	0	1	1	0	0	1	0	1	0	1	0	0	0	2	2	2	2	2	2	2	2	2	2	2	2	2	2	2	2	2	1	2	2	2	2
25400	男	1	0	0	0	1	0	0	0	0	0	0	0	0	0	1	0	0	0	0	0	0	0	0	0	1	0	1	1	1	1	1	3	1	1	3	1	1	1	1	1	1	1	1	1	1	1	1	1
26881	女	0	0	0	0	0	0	0	0	0	0	0	0	0	0	0	0	0	1	0	1	0	0	0	0	1	0	2	1	1	3	2	2	1	2	2	1	1	1	1	1	2	1	1	1	1	1	1	2
27171	女	0	0	0	0	0	0	0	0	0	0	0	0	0	0	1	0	0	0	0	0	0	0	0	0	1	0	2	1	1	2	1	1	3	2	2	1	1	1	1	1	2	1	1	1	2	1	1	1
27094	女	0	0	1	0	1	0	0	1	0	0	0	0	0	0	0	0	0	0	0	1	0	0	1	0	1	0	2	1	2	2	1	1	1	3	2	1	1	2	1	2	2	3	2	2	2	1	1	3
26133	女	0	0	0	0	0	0	0	0	0	0	0	0	0	0	0	0	0	1	0	0	0	0	0	0	0	0	1	1	2	3	2	1	1	2	1	1	1	1	1	1	1	1	1	2	1	1	1	1
26263	女	0	0	0	0	0	0	0	0	0	0	1	0	0	0	1	1	0	0	0	0	0	0	0	0	0	0	2	1	2	2	2	1	1	2	2	1	1	2	3	1	1	1	2	2	2	1	1	2
27044	女	0	0	0	0	0	0	0	0	0	0	0	0	0	0	0	0	0	1	0	0	0	0	0	0	1	0	1	1	2	1	1	1	2	1	1	1	1	1	1	1	1	1	1	1	1	1	1	2
26904	女	0	0	0	0	0	0	0	0	0	0	0	0	0	0	1	1	0	0	0	0	1	0	0	0	1	1	2	1	2	1	1	2	1	1	2	1	1	1	3	1	2	2	2	2	2	1	1	2
26557	女	0	0	0	0	1	0	0	0	0	0	0	0	0	0	1	1	1	1	0	1	0	0	0	0	0	0	2	2	2	2	2	2	2	2	2	2	1	1	1	1	2	2	2	1	1	1	1	1
14325	女	0	0	0	0	0	0	0	0	0	0	0	0	0	0	1	1	0	1	1	1	1	1	1	1	1	1	1	1	2	2	3	2	1	1	1	1	1	1	1	1	1	2	2	2	4	1	1	4
26242	女	0	0	0	0	0	0	0	0	0	0	0	0	0	0	1	0	1	0	0	0	0	0	0	0	0	0	3	2	1	1	2	1	1	2	1	1	1	2	5	2	2	2	2	1	2	2	2	2
26443	女	0	1	1	0	0	0	0	0	0	0	0	0	0	0	1	1	0	1	1	1	1	0	1	0	1	1	2	2	1	1	2	2	3	2	2	1	1	1	1	1	1	2	2	1	1	1	1	2
26750	女	0	0	0	0	0	0	0	0	0	0	0	0	0	0	0	0	0	0	0	0	0	0	0	0	0	0	2	1	2	1	1	1	1	1	1	1	1	1	2	2	2	1	3	1	2	1	1	1
26140	女	1	0	0	0	0	0	0	0	0	0	0	0	0	0	1	0	1	1	0	1	1	0	1	0	0	0	2	1	1	1	1	1	1	1	1	1	1	1	1	2	2	1	1	1	1	1	1	1
25983	女	0	0	0	0	0	0	0	0	0	0	0	0	0	0	1	1	0	1	1	1	1	1	1	1	1	0	3	3	3	3	2	3	2	2	4	3	4	4	5	1	2	2	3	1	3	3	2	4
26514	男	0	0	0	0	0	0	0	0	0	0	0	0	0	0	0	0	0	1	0	0	0	0	0	0	0	0	2	2	2	2	2	1	3	2	2	2	2	2	3	2	2	3	3	2	2	2	3	2
25942	男	0	0	0	0	0	0	0	0	1	0	0	0	0	0	1	0	0	0	0	0	0	0	0	0	0	0	2	1	1	1	1	1	1	1	1	1	1	1	3	2	2	2	3	1	1	1	1	1
27055	女	0	0	0	0	1	0	0	0	0	0	0	0	0	0	1	0	0	0	0	0	0	0	0	0	0	0	2	2	3	3	2	2	2	3	2	2	1	1	1	2	2	2	2	2	2	2	2	3
26905	女	0	0	0	0	0	0	0	0	0	0	0	0	0	0	1	0	0	1	0	0	0	0	0	0	0	0	1	1	1	1	1	1	4	1	1	1	1	4	4	1	1	1	1	1	1	1	1	1
26440	女	0	0	0	0	0	0	0	0	0	0	0	0	0	0	1	1	1	1	0	1	0	0	1	0	1	0	2	2	3	2	1	2	1	2	2	2	1	1	1	1	3	2	2	2	2	1	1	3
27064	女	1	0	0	0	0	0	0	0	0	0	0	0	0	0	1	1	0	0	0	0	0	0	1	0	0	0	2	1	2	2	2	1	1	1	1	1	1	1	1	2	2	1	1	1	1	1	1	1
26923	女	1	0	0	0	0	0	0	0	0	0	0	0	0	0	1	0	0	0	0	1	0	1	1	0	0	0	2	1	3	2	1	1	1	1	1	1	1	1	1	1	1	1	1	1	1	1	1	1
26149	女	1	0	0	0	0	0	0	0	0	0	0	0	0	0	1	0	1	0	0	0	0	0	0	0	0	0	1	1	2	2	1	1	1	1	2	1	1	1	1	1	2	2	1	2	1	1	1	2
26403	女	0	0	0	0	0	0	0	0	0	0	0	0	0	0	1	1	1	1	1	1	1	1	1	1	1	1	2	2	2	2	2	2	1	1	2	1	1	1	1	1	2	2	2	1	1	1	1	1
23043	女	0	0	0	0	0	0	0	0	0	0	0	0	0	0	0	0	0	0	0	0	0	0	0	0	0	0	1	1	1	1	1	1	2	1	1	1	1	1	1	1	1	1	1	1	1	1	1	1
26685	女	0	0	0	0	0	0	0	0	0	0	0	0	0	0	1	0	0	0	0	0	0	0	1	0	1	0	1	1	2	1	2	3	1	1	1	1	1	1	1	3	1	3	4	1	2	2	1	1
27063	女	0	0	0	0	0	0	0	0	0	0	0	0	0	0	1	0	1	0	1	1	0	0	1	0	1	0	1	1	2	2	1	1	1	1	1	1	1	1	1	1	1	1	1	2	1	1	1	2
26894	女	0	0	0	0	1	0	0	0	0	0	0	0	0	0	1	0	1	0	0	0	0	1	0	0	0	0	2	3	3	3	2	2	1	2	3	1	1	2	1	1	2	4	3	1	2	1	1	2
25673	女	0	0	0	0	0	0	0	0	0	0	0	0	0	0	0	0	1	0	0	0	0	1	0	0	0	0	1	1	2	2	1	1	1	1	1	1	1	1	1	1	1	1	2	1	2	1	1	2
26324	女	0	0	0	0	1	0	0	0	0	0	0	0	0	0	1	0	0	1	0	0	0	0	0	0	0	1	2	2	2	2	1	2	2	1	2	1	1	2	2	2	2	2	1	1	1	1	1	2
26572	女	0	0	0	0	0	0	0	0	0	0	0	0	0	0	1	1	1	1	1	1	0	0	1	0	0	0	1	2	2	4	3	3	3	3	2	1	1	1	1	4	3	3	1	1	1	1	1	1
26728	女	0	0	0	0	0	0	0	0	0	0	0	0	0	0	1	1	1	1	0	0	0	0	1	0	1	0	2	2	2	2	2	2	1	2	2	1	1	1	1	1	2	2	3	2	1	1	1	2
26768	女	0	0	0	0	0	0	0	1	0	0	0	0	0	1	1	1	1	1	1	1	1	1	1	1	1	1	3	2	2	2	3	1	3	4	2	2	1	1	1	2	3	1	2	1	1	1	2	2
27323	女	0	0	0	0	0	0	0	0	0	0	0	0	0	0	0	1	1	1	0	0	0	0	0	0	0	0	2	2	2	2	1	1	2	1	1	1	1	1	1	1	1	1	1	1	1	1	1	2
25896	女	0	0	0	0	0	0	0	0	0	0	0	0	0	0	1	0	0	0	0	0	1	1	1	1	0	0	2	3	2	2	2	1	4	1	2	1	1	1	1	2	2	1	1	2	3	1	2	3
25837	女	0	0	0	0	0	0	0	0	0	0	0	0	0	0	0	0	0	1	1	1	1	0	1	0	0	1	2	2	2	2	1	2	1	1	1	1	1	1	2	2	3	2	3	3	1	1	2	3
26885	女	0	0	0	0	0	0	0	0	0	0	0	0	0	0	0	0	0	0	0	0	0	0	0	0	0	0	1	1	2	2	1	1	1	1	1	1	1	2	2	2	2	1	2	2	1	1	1	2
27075	女	0	0	0	0	0	0	0	0	0	0	0	0	0	0	1	1	1	0	0	1	1	0	0	0	0	0	2	1	1	1	2	2	1	1	1	1	1	1	1	1	1	2	2	1	1	1	1	1
26741	女	0	0	0	0	0	0	0	0	0	0	0	0	0	0	0	1	0	0	0	0	0	0	1	0	0	0	3	3	2	3	3	2	2	2	2	2	1	1	1	2	2	2	2	2	2	2	2	2
26151	女	0	0	0	0	0	0	0	0	0	0	0	0	0	0	1	1	0	0	0	0	1	0	1	0	0	1	2	2	2	2	1	1	1	1	1	1	1	1	1	2	2	1	1	1	1	1	1	1
26924	女	0	0	0	0	0	0	0	0	0	0	0	0	0	0	0	1	0	0	0	0	0	0	0	0	0	0	1	1	2	2	1	1	1	1	2	1	1	1	1	1	2	1	1	1	1	1	1	2
26252	女	1	0	0	0	0	0	0	0	0	0	0	0	0	0	0	1	1	0	0	0	1	0	1	0	1	1	2	2	3	3	2	2	1	3	3	3	3	4	4	3	4	4	4	2	4	4	3	4
25875	女	1	0	0	0	0	0	0	0	0	0	0	0	0	0	1	0	0	0	0	0	0	0	0	0	0	0	2	1	2	2	2	2	3	2	2	1	1	2	3	2	1	1	2	1	2	1	1	2
14120	女	1	1	1	0	1	0	0	0	0	0	0	0	0	0	1	1	0	1	1	1	1	1	1	1	1	1	3	3	3	2	3	2	3	3	2	2	1	3	5	2	2	3	2	2	1	1	1	4
25753	女	0	1	1	0	0	0	0	1	0	0	0	0	0	0	1	0	1	1	0	1	1	0	1	0	0	1	1	1	1	1	2	1	1	1	1	1	1	1	1	1	3	2	3	1	1	1	1	1
26305	女	1	1	1	0	0	0	0	0	0	0	0	0	0	0	1	0	1	0	0	0	0	0	0	0	0	0	2	1	2	2	2	1	1	1	2	1	1	1	1	1	1	1	1	1	1	1	1	2
27025	女	0	0	0	0	0	0	0	0	0	0	0	0	0	0	0	1	0	1	0	0	0	0	1	0	0	0	1	1	1	1	1	1	1	1	1	1	1	1	1	1	1	1	1	1	1	1	1	1
27367	女	0	0	0	0	0	0	0	0	0	0	0	0	0	0	1	1	0	0	0	0	0	0	0	1	0	0	2	2	2	3	3	1	2	4	2	1	1	2	4	2	3	1	1	4	4	4	1	2
23218	女	1	0	1	0	0	0	0	0	0	0	0	0	0	0	0	0	0	0	0	0	0	0	0	0	0	0	1	1	2	2	1	1	1	1	2	1	1	1	2	1	1	1	1	1	2	1	1	1
25745	女	1	1	0	0	0	0	0	0	0	0	0	0	0	0	1	0	0	0	0	1	0	0	1	0	1	0	1	1	1	1	1	1	1	1	1	1	1	1	1	1	1	1	1	1	1	1	1	1
25527	男	1	0	0	0	0	0	0	0	0	0	0	0	0	0	1	0	0	1	0	0	0	0	1	0	0	0	1	1	2	1	1	1	1	2	2	1	1	1	1	2	2	1	1	2	3	1	1	1
27048	女	1	0	0	0	0	0	0	0	0	0	0	0	0	0	0	0	0	0	0	0	0	0	1	0	0	0	1	1	1	2	2	1	1	1	2	1	1	1	1	2	1	1	1	1	1	1	1	1
26926	女	1	0	0	0	0	0	0	0	0	0	0	0	0	0	0	0	0	0	0	1	1	1	0	1	0	0	3	3	3	3	1	2	3	1	1	1	1	1	1	1	1	1	1	1	1	1	1	1
25884	女	0	0	0	0	1	0	0	0	0	0	0	0	0	0	1	0	0	0	0	0	0	0	0	0	0	0	1	1	1	1	1	1	1	1	1	1	1	1	1	1	1	2	1	1	1	1	1	1
27097	女	1	0	0	0	0	0	0	0	0	0	0	0	0	1	1	1	0	0	1	0	1	1	1	1	1	0	2	1	3	2	2	3	1	1	3	1	1	1	4	2	3	1	1	1	1	1	1	2
26936	女	1	0	0	0	0	0	0	0	0	0	0	0	0	0	0	1	1	0	0	0	0	0	0	0	0	0	2	1	2	1	1	1	1	1	2	1	1	1	2	1	1	1	1	1	1	1	1	2
25415	女	1	0	0	0	0	0	0	0	0	0	0	0	0	0	1	0	0	0	0	0	0	1	1	0	0	1	2	2	2	2	1	2	1	1	2	2	1	1	2	3	3	2	3	2	2	2	2	3
27088	女	0	0	0	0	1	0	0	0	0	0	0	0	0	0	0	0	0	0	0	0	0	0	0	0	0	0	1	1	1	1	1	1	1	1	1	1	1	1	1	1	1	3	1	1	1	1	1	1
25919	女	0	0	0	0	0	0	0	0	0	0	0	0	0	0	1	0	0	0	0	1	1	1	0	0	0	0	2	1	2	1	1	2	1	2	2	2	1	1	1	2	3	1	1	1	1	1	2	2
25262	女	0	0	0	0	0	0	0	0	0	0	0	0	0	0	1	0	0	1	0	0	0	0	0	0	0	0	1	1	1	1	1	1	1	1	1	1	1	1	1	1	1	1	1	1	1	1	1	1
26854	女	0	0	0	0	0	0	0	0	0	0	0	0	0	0	1	0	0	1	0	0	0	0	0	0	0	0	2	2	2	1	1	1	1	1	2	1	1	1	1	2	2	2	1	1	2	1	1	2
26359	女	0	0	0	0	0	0	0	0	0	0	1	0	0	0	0	0	1	1	1	0	0	0	0	0	0	0	4	1	1	1	1	1	1	1	1	1	1	1	1	1	1	1	1	1	1	1	1	1
26122	女	0	0	0	0	0	0	0	0	0	0	0	0	0	0	1	1	1	1	1	1	1	0	1	0	1	1	2	2	2	2	2	2	3	3	3	2	4	3	5	3	3	3	2	2	2	4	3	3
25785	女	0	0	0	0	0	0	0	0	0	0	0	0	0	0	1	1	1	1	1	1	1	1	1	1	1	1	3	2	2	2	3	3	2	2	3	3	1	1	1	2	2	3	3	3	1	1	1	3
26935	女	0	1	0	1	0	0	1	0	0	0	0	0	0	0	1	1	1	0	0	0	0	0	1	1	0	0	2	1	2	1	2	1	1	1	1	1	1	1	1	1	1	1	2	1	1	1	1	2
26438	女	0	0	0	0	0	0	0	0	0	0	0	0	0	0	1	1	0	1	1	1	1	1	0	0	1	0	2	2	3	1	1	2	1	1	2	1	1	1	1	1	1	2	1	2	1	1	1	2
26653	女	0	0	0	0	0	0	0	0	0	0	0	1	0	0	1	0	0	1	0	1	1	1	1	1	0	0	4	4	4	4	2	2	1	1	4	3	1	1	3	3	4	2	3	3	4	1	1	4
25584	女	1	0	0	0	0	0	0	0	0	0	0	0	0	0	1	0	0	0	0	1	1	0	1	0	0	0	1	2	3	2	2	1	1	2	2	1	1	1	1	1	2	1	1	2	2	1	1	2
27347	女	1	0	0	0	0	0	0	0	0	0	0	0	0	0	1	0	0	1	0	0	0	0	1	0	1	1	2	2	2	2	1	1	2	2	1	1	1	1	1	2	1	1	1	2	1	1	1	2
25734	女	1	0	0	0	0	0	0	0	0	0	0	0	0	0	1	0	0	1	1	0	0	0	1	0	0	0	2	2	1	2	2	1	2	2	2	2	2	1	1	2	1	2	2	1	2	2	1	2
25890	女	1	0	0	0	0	0	0	0	0	0	0	0	0	0	0	0	0	0	1	0	0	0	0	0	0	0	2	2	2	2	2	2	2	2	2	2	1	1	2	2	2	2	2	2	2	2	2	2
25233	女	1	0	0	0	0	0	0	0	0	0	0	0	0	0	1	0	0	0	0	0	0	0	0	0	0	0	1	1	1	1	1	1	1	1	1	1	1	1	1	1	1	1	1	1	1	1	1	1
26231	女	1	0	0	0	0	0	0	0	0	0	0	0	0	0	1	1	1	1	1	1	1	1	1	1	1	1	2	1	3	4	2	1	1	1	2	1	1	2	1	1	2	2	2	1	1	2	1	2
27368	女	1	0	0	0	0	0	0	0	0	0	0	0	0	0	0	0	0	0	0	0	0	0	0	0	0	0	1	1	1	1	1	1	1	1	1	1	1	1	1	1	1	1	1	1	1	1	1	1
26555	女	1	0	0	0	0	0	0	0	0	0	0	0	0	0	1	1	0	0	1	0	0	0	0	0	1	0	2	1	1	1	1	1	2	1	1	1	1	1	1	1	1	1	1	1	1	1	1	1
25580	女	1	0	0	0	0	0	0	0	0	0	0	0	0	0	0	0	0	0	0	0	0	0	0	0	0	0	1	1	1	1	1	1	1	1	1	1	1	1	1	1	1	1	1	1	1	1	1	1
26606	女	0	0	0	0	0	0	0	0	0	0	0	0	0	0	0	0	0	0	0	0	0	0	0	0	0	0	2	1	2	1	1	1	2	2	2	1	1	2	2	1	2	1	1	1	1	1	1	2
26547	男	0	1	1	0	1	0	0	1	0	0	0	0	0	0	1	0	0	0	0	0	0	0	0	0	0	0	1	1	1	1	1	1	2	1	1	1	1	1	2	1	2	3	1	1	1	1	1	1
26161	女	0	0	0	0	0	0	0	0	0	0	0	0	0	0	1	0	0	0	0	0	0	0	0	0	0	0	1	1	1	2	1	1	1	1	1	1	1	1	1	1	1	1	1	1	1	1	1	1
27346	女	1	1	1	1	1	0	1	0	0	0	0	0	0	0	0	0	0	0	0	0	0	0	1	0	0	0	2	2	2	2	1	1	1	1	2	1	1	1	1	1	1	2	1	1	2	1	1	2
26799	女	0	0	0	0	0	0	0	0	0	0	0	0	0	0	1	0	0	1	0	0	0	0	0	0	0	0	1	1	2	2	1	3	2	1	2	2	1	1	1	1	1	1	2	1	1	1	1	2
14352	女	0	0	0	0	1	0	0	0	0	0	0	0	0	0	1	1	1	1	0	1	1	1	1	1	0	1	3	3	3	3	2	1	4	3	2	2	1	3	3	3	3	3	3	3	2	3	1	1
27047	女	0	0	0	0	0	0	0	0	0	0	0	0	0	0	1	1	0	0	0	1	1	0	1	0	0	0	3	3	3	1	2	2	1	1	2	2	3	2	3	2	3	2	2	3	3	2	2	3
26825	女	0	0	0	0	1	0	0	0	0	0	0	0	0	0	1	1	1	1	1	1	1	1	1	1	1	1	3	3	2	3	2	1	1	1	2	1	1	1	1	1	2	2	2	1	1	1	1	2
25587	女	0	0	0	0	0	0	0	0	0	0	0	0	0	0	1	0	1	1	1	0	1	1	1	0	0	1	2	2	2	2	3	2	1	2	3	2	1	1	2	1	3	3	2	2	3	4	2	3
27087	女	0	0	0	0	0	0	0	0	0	0	0	0	0	0	1	1	1	1	1	1	1	0	1	1	1	1	1	1	1	4	4	3	1	2	1	1	1	1	1	1	1	1	1	1	1	1	1	2
26994	女	0	1	0	0	0	0	0	0	0	0	0	0	0	0	1	0	0	0	0	0	0	0	0	0	0	0	1	1	1	3	1	1	1	1	2	1	1	1	1	1	1	1	1	1	1	1	1	1
25790	女	1	0	0	0	0	0	0	1	0	0	0	0	0	0	1	1	1	1	0	1	0	0	1	0	0	0	3	3	3	3	2	3	1	1	2	2	1	2	2	2	2	3	3	1	3	1	1	2
13957	女	0	0	0	0	0	0	0	0	0	0	0	0	0	1	1	1	1	0	0	0	1	0	1	1	1	1	3	3	3	3	3	2	1	2	2	2	1	3	4	1	3	3	3	3	3	3	2	2
26785	女	0	0	0	0	0	0	0	0	0	0	0	0	1	0	0	0	0	0	0	0	0	0	0	0	0	0	1	1	1	1	1	1	1	1	1	1	1	1	2	1	1	2	2	1	1	1	1	2
26643	女	1	0	0	0	0	0	0	0	0	1	0	0	0	0	1	1	1	1	1	0	0	0	1	0	1	0	1	1	1	1	1	2	1	1	1	1	1	1	1	1	1	1	1	1	1	1	1	2
13982	女	0	0	0	0	1	1	1	0	0	0	0	0	0	0	1	1	1	0	1	1	1	1	1	1	1	1	2	1	2	1	1	1	2	1	3	1	2	1	1	3	1	2	1	3	1	2	1	2
26097	女	0	0	0	0	0	0	0	0	0	0	0	0	0	1	1	1	1	1	1	0	1	1	1	1	0	0	2	2	2	2	2	3	1	4	4	2	3	4	4	2	2	3	2	1	3	3	2	3
25913	女	0	0	0	0	0	0	0	1	0	0	1	1	0	0	1	0	1	1	1	0	1	1	1	1	1	0	2	2	1	4	1	1	4	1	1	1	1	1	1	1	1	1	3	1	1	1	1	1
27123	女	1	0	1	0	0	0	0	0	0	0	0	0	0	0	1	0	0	1	0	0	1	0	0	0	0	0	1	1	2	2	2	1	2	1	2	1	1	2	3	2	1	1	1	1	1	1	1	2
26789	女	0	0	0	0	0	0	0	0	0	0	0	0	0	0	1	0	0	1	0	0	0	0	1	0	0	0	2	2	2	2	1	1	2	1	2	2	1	3	3	2	2	2	3	1	2	1	1	3
14153	女	0	0	0	0	0	0	0	0	0	0	0	0	0	0	1	1	0	1	1	0	0	0	1	1	1	1	3	1	4	5	4	2	3	3	3	1	1	1	4	4	3	1	3	1	1	1	1	4
26759	女	0	0	1	0	1	0	0	0	0	0	0	0	0	0	0	0	0	1	0	0	0	0	1	1	0	0	2	2	2	3	3	2	1	2	2	2	1	1	3	3	2	2	1	1	1	1	1	1
27395	女	0	0	0	0	0	0	0	0	0	0	0	0	0	0	1	1	1	1	1	0	1	1	1	1	1	1	2	2	2	2	2	2	3	2	2	1	1	1	1	1	2	1	1	1	3	1	1	2
27092	女	0	0	1	0	0	0	0	0	0	0	0	0	0	0	1	0	0	0	0	0	1	0	0	0	1	0	2	2	2	2	2	1	1	2	2	1	1	3	3	2	2	2	1	1	1	1	1	2
14336	女	0	0	0	0	1	0	0	0	0	0	0	0	0	0	1	1	1	1	1	1	1	1	1	1	1	1	4	3	2	3	4	2	3	2	3	3	1	1	1	1	4	4	3	1	1	1	1	1
26910	女	0	0	0	0	1	0	0	0	0	0	0	0	0	0	1	0	0	0	0	0	0	0	0	0	0	0	1	1	2	2	2	2	1	2	2	1	1	1	2	1	2	2	1	1	1	1	1	1
25822	女	0	0	0	0	0	0	0	0	0	0	0	0	0	0	0	0	0	0	0	0	0	0	0	0	0	0	1	1	1	1	1	1	1	1	1	1	1	1	1	1	1	1	1	1	1	1	1	1
26970	男	1	0	0	0	0	0	0	0	0	0	0	0	0	0	1	0	0	0	0	0	0	1	1	0	1	0	2	2	3	3	4	3	2	2	2	2	2	1	1	1	1	2	1	1	1	1	1	1
26916	女	0	0	0	0	0	1	0	1	0	0	1	0	0	0	1	1	0	1	1	1	1	1	1	0	1	0	2	2	2	2	1	1	2	3	1	1	1	2	1	1	1	1	4	1	1	2	1	2
25906	女	1	0	0	0	0	0	0	0	0	0	0	0	0	0	1	0	0	0	1	1	1	0	1	1	1	0	2	2	2	2	2	1	1	2	1	1	1	1	1	1	2	1	1	1	1	1	1	1
26374	女	0	0	0	0	0	0	0	0	0	0	1	0	0	0	1	1	0	1	1	0	0	0	1	1	1	0	2	1	2	2	3	1	1	2	3	1	1	2	2	3	2	3	1	1	1	1	2	3
26697	女	0	0	0	0	1	0	0	0	0	0	0	0	0	0	1	1	1	1	1	0	1	1	1	1	1	1	2	3	4	2	1	4	1	2	3	1	1	1	1	1	3	3	1	1	1	1	1	4
26323	女	1	0	0	0	0	0	0	0	0	0	0	0	0	0	0	0	0	0	1	1	1	1	1	1	1	1	2	1	2	1	1	1	1	1	1	1	1	1	2	2	1	1	1	1	1	1	1	1
14159	女	0	0	0	0	0	0	0	0	0	0	0	0	0	0	1	1	1	1	1	1	1	0	1	1	1	1	3	3	3	2	2	2	2	2	3	2	1	2	2	2	3	2	2	2	2	2	2	4
27385	女	0	0	0	0	0	0	0	0	0	0	0	0	0	0	1	0	0	1	1	1	1	0	1	0	1	0	2	2	3	3	2	2	2	1	3	1	1	1	1	2	2	2	1	2	1	1	1	3
25950	女	0	0	0	0	0	0	0	1	0	0	0	0	0	1	1	1	1	1	1	1	1	1	1	0	1	1	3	3	2	4	3	1	1	1	3	2	1	1	1	1	3	3	3	3	3	2	3	2
26730	女	0	0	0	1	1	0	0	0	0	0	0	0	0	0	1	1	1	1	1	1	1	0	1	1	1	1	4	2	2	3	3	3	2	1	2	2	1	4	5	3	3	4	5	2	2	1	2	1
14147	女	1	0	0	0	0	0	0	0	0	1	0	0	0	1	1	1	1	1	1	0	0	0	1	0	1	0	3	3	3	3	1	3	2	1	1	2	1	2	4	2	2	2	2	1	2	1	2	1
25632	女	0	0	0	0	0	0	0	0	0	0	0	0	0	0	1	0	0	0	0	0	0	0	1	0	1	0	3	3	2	3	1	2	3	1	2	2	1	1	1	2	3	2	1	2	3	3	2	3
27045	女	0	0	0	0	0	0	0	0	0	0	0	0	0	0	1	0	1	1	1	0	0	0	1	0	0	0	2	1	2	2	1	1	1	1	1	1	1	1	1	1	1	1	1	1	1	1	1	1
19140	女	0	0	0	0	0	0	0	0	0	0	0	0	0	0	1	1	1	1	1	1	1	1	1	1	1	1	2	2	2	2	2	2	2	1	4	2	1	3	3	2	3	2	2	3	3	1	2	3
28001	女	0	1	1	0	0	0	0	0	0	0	0	0	0	0	0	0	0	0	0	0	0	0	0	0	0	0	1	1	1	1	1	1	1	1	1	1	1	1	1	1	1	1	1	1	1	1	1	1
18680	女	0	0	0	0	0	0	0	0	0	0	0	0	1	1	1	1	1	1	1	1	1	1	1	1	1	1	2	2	3	2	2	2	2	2	3	3	5	1	1	4	4	3	1	3	1	1	1	3
18491	女	0	0	1	1	0	0	0	1	0	0	0	1	0	0	1	1	1	1	1	1	1	1	1	1	1	1	3	3	3	3	3	3	3	3	3	3	3	3	4	3	3	3	3	3	4	3	3	3
18596	女	1	0	0	0	0	0	0	0	0	0	0	0	0	0	1	1	1	1	1	1	1	1	1	1	0	1	3	4	4	4	3	1	1	5	4	4	3	5	5	3	2	4	4	4	2	3	2	5
18207	男	0	0	0	0	0	0	0	1	0	0	1	0	0	1	1	1	1	1	1	1	1	1	1	1	1	1	3	3	3	3	2	3	3	3	3	3	3	3	3	3	3	3	3	3	3	3	3	3
16988	女	0	0	0	0	1	0	0	0	0	0	0	0	0	1	1	1	0	1	1	1	1	1	1	1	1	1	2	3	2	2	2	2	2	1	2	2	1	1	1	1	2	3	3	2	2	3	2	2
27406	女	0	0	0	0	1	0	0	0	0	0	0	0	0	0	1	1	1	1	1	1	1	0	1	1	1	1	2	2	3	2	1	1	1	1	2	1	1	1	2	1	2	2	1	1	1	1	1	3
23758	男	0	0	0	0	0	0	0	0	0	0	0	0	0	0	1	0	0	0	0	1	0	0	0	0	1	0	2	3	2	3	2	2	3	1	2	2	1	2	2	2	3	2	2	1	2	1	2	3
23509	男	1	0	0	0	0	0	0	0	0	0	0	1	0	0	1	0	0	1	1	1	1	0	1	1	1	0	2	2	2	2	3	2	3	3	3	2	2	3	4	2	3	3	3	2	2	3	3	3
23547	男	0	0	0	0	0	0	0	0	0	0	0	0	0	1	1	1	0	1	1	0	0	0	0	0	1	0	1	1	2	1	1	1	1	2	2	1	1	3	1	2	1	1	1	1	2	1	1	3
22401	男	1	0	0	0	0	0	0	0	0	0	0	0	0	0	1	1	1	0	0	0	0	0	0	0	0	0	2	2	2	2	1	1	1	1	1	1	1	1	1	1	1	1	1	1	1	1	1	1
28489	男	1	0	0	0	0	0	0	0	0	0	0	0	0	0	1	1	1	0	1	0	1	0	1	1	1	0	2	2	2	2	1	1	2	2	1	1	1	1	1	2	2	2	1	1	2	2	1	1
18551	女	1	1	1	0	1	0	0	0	0	0	0	0	0	1	1	0	1	1	1	1	1	1	1	1	1	1	3	3	3	4	2	1	3	3	3	2	1	3	4	2	3	3	3	2	2	3	2	3
18538	女	1	0	0	0	0	0	0	0	0	0	0	0	0	0	1	1	0	1	1	0	1	0	1	1	0	0	3	3	3	3	2	4	1	1	2	1	1	1	1	1	3	1	3	1	1	1	1	3
18671	女	0	0	0	0	0	0	0	0	0	0	0	0	0	0	0	1	1	0	1	1	1	1	1	1	1	1	2	3	3	3	3	3	4	3	3	3	3	4	4	3	3	3	3	4	4	3	3	3
18449	男	1	0	0	0	1	0	0	0	0	0	1	0	0	0	1	1	1	1	1	0	1	1	1	1	1	1	3	2	4	3	3	3	3	3	3	2	1	4	1	2	3	4	4	3	2	2	3	3
18405	女	0	0	0	0	0	0	0	0	0	0	0	1	0	0	1	0	1	1	1	1	1	1	1	1	1	1	2	3	1	1	2	2	1	1	1	1	1	1	3	1	1	1	1	3	2	1	1	3
29205	女	0	0	0	0	0	0	0	0	0	0	0	0	0	0	0	0	0	0	0	0	0	0	0	0	0	0	1	1	1	3	1	1	1	2	1	1	1	1	1	1	1	1	1	1	1	1	1	1
18506	男	0	0	0	0	1	0	0	1	0	0	0	0	0	1	1	1	1	0	1	1	1	0	1	0	0	0	2	2	2	2	2	4	1	2	2	1	1	1	2	5	4	5	2	2	2	2	5	4
25031	男	1	0	1	0	0	0	0	0	0	0	0	0	0	0	0	0	0	0	0	0	0	0	0	0	0	0	2	1	2	1	1	1	1	1	2	1	1	1	1	1	1	1	1	1	1	1	1	1
18462	男	0	0	0	0	0	0	0	0	0	0	0	0	0	0	1	1	1	1	1	1	1	1	1	1	1	0	3	4	2	4	3	4	4	3	4	2	1	1	5	4	4	2	3	1	4	4	4	5
28111	男	0	0	0	0	0	0	0	0	0	0	0	0	0	0	1	0	0	1	1	0	0	0	1	0	1	0	3	3	3	3	2	3	2	2	2	2	3	3	3	3	4	2	3	1	3	2	3	4
18603	女	0	0	0	0	0	0	0	1	0	0	0	0	0	0	1	0	1	1	0	0	1	0	0	0	0	0	3	2	3	2	1	1	2	3	3	1	1	1	1	3	3	2	2	2	4	1	2	5
24786	女	0	1	0	0	0	0	0	0	0	0	0	0	0	0	0	0	1	1	1	1	1	0	0	1	1	1	2	2	3	2	2	1	3	3	2	1	1	2	2	2	3	3	3	3	3	1	2	3
24709	女	1	0	0	0	0	0	0	0	0	0	1	0	1	0	1	0	1	0	0	0	1	0	0	0	0	0	2	1	2	1	1	1	1	2	2	1	1	3	4	3	2	2	1	1	1	2	2	2
23001	女	1	0	0	0	0	0	0	0	0	0	0	0	0	0	0	0	0	0	0	0	0	0	0	0	0	0	1	1	1	1	1	1	1	1	1	1	2	2	2	2	1	1	1	1	1	1	1	1
27665	女	0	0	0	0	0	0	0	0	0	0	0	0	0	0	0	0	0	0	0	0	1	0	1	0	0	0	2	1	2	2	1	1	2	1	1	1	1	1	1	2	2	2	2	1	1	1	1	2
23505	女	0	0	0	0	0	0	0	0	0	0	0	0	0	0	1	0	0	0	0	0	0	0	0	0	0	0	2	2	2	2	1	1	1	1	1	1	1	1	1	1	1	1	1	1	2	1	1	2
27726	女	0	0	0	0	0	0	0	0	0	0	0	0	0	0	0	0	0	0	0	1	0	1	0	0	0	0	2	2	3	2	2	2	1	2	2	2	1	1	2	2	2	2	2	2	2	1	2	2
23488	女	0	0	0	0	0	0	0	0	0	0	0	0	0	0	1	1	0	0	0	0	0	0	0	1	0	0	1	1	2	3	2	1	1	1	1	1	1	1	1	1	1	1	1	1	1	1	1	1
26276	女	1	0	0	0	0	0	0	0	0	0	0	0	0	0	1	1	1	1	1	0	1	0	1	1	1	1	1	3	1	2	1	1	1	1	1	1	1	1	1	1	1	1	2	1	2	1	1	3
27707	女	1	0	0	0	0	0	0	0	0	0	0	0	0	0	0	0	0	0	0	0	0	0	1	0	0	0	1	1	1	1	1	1	1	1	1	1	1	1	1	2	1	1	1	1	1	1	1	1
23453	女	0	0	0	0	1	0	0	0	0	0	0	0	0	0	0	0	1	0	0	0	0	0	1	0	0	0	2	1	1	1	1	1	1	1	1	1	1	3	1	1	1	2	1	1	1	1	1	1
16382	女	0	0	0	0	0	0	0	0	0	0	0	0	0	0	1	1	0	1	1	1	1	1	1	1	1	1	2	2	3	2	2	4	2	2	2	2	1	2	1	2	2	3	4	2	2	3	2	4
23461	女	0	0	0	0	0	0	0	0	0	0	0	0	0	0	1	0	1	0	1	0	1	1	1	0	0	0	2	3	4	3	4	2	2	2	3	2	2	2	3	2	2	2	2	1	2	2	3	1
17604	男	1	0	0	0	0	0	0	0	0	0	0	0	0	0	1	0	0	1	1	0	1	1	0	0	0	1	1	1	4	3	1	1	1	1	3	3	5	4	5	3	3	4	4	1	1	1	1	4
18495	女	0	0	0	0	0	0	0	0	0	1	0	1	0	1	1	1	1	1	1	1	0	1	0	1	0	0	1	2	2	2	3	2	2	2	2	1	3	2	1	1	1	1	1	1	1	1	1	2
18287	女	1	0	0	0	0	0	0	0	0	0	0	0	0	0	1	1	1	1	1	1	1	1	1	1	1	0	3	2	3	2	4	1	2	1	1	1	1	1	1	1	2	1	1	1	1	1	1	2
23331	女	0	0	0	0	0	0	0	0	0	0	0	0	0	0	1	0	1	0	0	0	0	0	1	0	0	0	2	1	3	1	4	1	2	1	1	1	1	1	1	1	4	1	1	1	1	1	1	1
25627	女	0	0	0	0	0	0	0	0	0	0	0	0	0	0	0	0	0	0	0	0	0	0	0	0	0	0	2	1	2	2	1	1	1	1	1	1	1	1	1	1	1	2	1	1	1	1	1	1
18215	女	0	0	0	0	0	0	0	0	0	1	0	0	0	1	1	1	1	1	1	1	1	0	1	1	1	0	2	3	2	2	2	2	5	3	2	1	1	3	5	2	2	1	2	1	2	2	1	2
28135	女	0	0	0	0	0	0	0	0	0	0	0	0	0	0	0	0	0	0	0	0	1	0	0	0	0	0	2	2	2	2	2	2	2	2	2	1	2	2	3	2	2	2	2	2	2	2	2	2
18624	女	1	1	1	0	1	0	0	0	0	0	0	0	0	0	1	1	0	1	1	1	1	0	0	1	0	0	3	2	3	3	2	2	2	2	3	2	3	3	4	3	3	3	3	4	4	4	3	4
23602	女	0	0	0	0	0	0	0	0	0	0	0	0	0	0	1	0	1	0	0	1	0	0	0	0	0	0	2	3	2	2	1	1	1	1	2	1	1	1	1	2	3	2	1	2	1	2	2	2
19159	女	0	0	0	0	0	0	0	0	0	0	0	0	0	0	1	0	0	0	0	0	0	0	1	1	1	1	4	3	4	4	4	2	1	2	2	2	1	1	3	3	2	4	4	2	4	3	3	3
18768	女	0	0	0	0	1	0	0	0	0	1	0	0	0	0	1	1	1	1	1	1	1	1	1	1	1	1	3	3	2	4	3	1	2	2	2	2	1	1	1	2	2	5	3	1	1	1	1	3
16095	女	0	1	0	0	0	1	0	1	0	0	1	0	0	0	1	1	1	1	1	1	1	1	1	1	1	1	3	3	3	3	3	3	2	3	3	2	2	2	2	3	4	3	4	3	3	1	2	5
23706	女	0	0	0	0	0	0	0	0	0	0	0	0	0	0	0	0	0	1	0	0	0	0	1	0	0	0	1	1	2	1	1	1	2	2	1	1	1	3	4	1	2	2	2	2	2	1	1	2
23710	女	1	1	1	0	0	0	1	0	0	0	0	1	0	0	1	1	0	0	1	1	0	1	1	1	0	1	3	5	3	5	2	2	2	2	2	2	1	1	3	2	3	2	3	2	2	2	2	4
23525	男	0	0	0	0	0	0	0	0	0	0	0	0	0	0	1	0	1	1	0	1	1	0	1	1	0	1	2	2	2	3	3	1	3	1	2	1	2	2	2	2	2	2	2	1	1	1	1	3
13997	男	0	0	0	0	0	1	0	0	0	0	0	0	0	0	1	0	1	1	0	0	0	0	0	1	0	0	1	2	2	2	1	1	1	2	2	2	2	2	2	2	1	1	1	1	1	1	1	1
23573	男	1	0	0	0	0	0	0	0	0	0	0	0	0	0	1	0	0	1	0	0	0	0	1	0	0	0	1	2	2	1	1	1	2	2	2	2	1	1	3	3	3	2	2	1	2	1	1	1
23258	男	0	0	0	0	0	0	0	0	0	0	0	0	0	0	0	0	0	0	0	0	0	0	1	0	0	0	1	1	2	1	1	1	1	1	1	1	1	1	1	1	1	2	1	1	1	1	1	2
18769	女	1	0	0	0	0	0	0	0	0	0	1	1	0	0	0	0	1	1	1	1	1	1	1	1	1	1	1	1	1	1	1	3	1	1	2	2	2	1	1	1	1	1	1	2	3	2	2	2
18755	女	0	0	0	0	0	1	0	0	0	0	0	0	0	0	1	1	1	1	1	1	1	1	1	1	1	1	3	3	4	3	1	1	2	2	2	2	3	4	5	2	3	4	4	2	2	2	2	4
27923	女	0	0	0	0	0	0	0	0	0	0	0	0	0	0	0	0	0	0	0	0	0	0	1	0	0	0	2	1	1	1	1	1	1	1	1	1	1	1	1	1	1	1	1	1	1	1	1	1
15546	男	1	1	0	0	1	0	0	0	0	0	0	0	0	0	1	1	0	0	0	1	0	0	0	0	0	0	1	1	1	1	1	1	1	1	1	1	1	1	1	1	1	1	1	1	1	1	1	1
18735	男	0	1	0	1	1	0	0	0	0	0	0	0	0	0	1	1	1	0	1	1	1	1	1	1	1	0	4	3	3	4	2	3	3	4	3	2	2	1	2	2	2	3	4	2	1	1	1	2
27404	女	0	0	0	0	1	0	0	0	0	0	0	0	0	0	0	0	0	0	0	0	0	0	0	0	0	0	1	1	1	1	1	1	1	1	1	1	1	1	1	1	1	2	1	1	1	1	1	2
18212	女	0	0	0	0	0	0	0	0	0	0	0	0	0	0	1	1	1	1	1	1	1	1	1	1	1	1	3	3	3	3	3	3	3	3	3	3	1	1	1	4	4	4	3	3	4	4	4	3
18587	女	0	0	0	0	1	0	0	0	0	0	0	0	0	0	1	0	1	1	1	1	1	1	1	1	1	1	3	3	3	3	3	3	3	2	3	2	1	1	2	2	2	3	3	2	1	1	1	2
18268	女	0	0	0	0	1	0	0	0	0	0	0	0	0	0	1	1	0	1	1	1	1	1	1	1	1	1	3	3	3	3	3	3	3	3	3	3	3	3	3	3	3	3	3	3	3	3	3	3
18208	男	0	0	0	0	0	0	0	0	0	0	0	0	0	1	1	1	0	0	1	1	1	1	1	0	0	1	2	3	2	2	2	2	1	2	3	1	1	3	3	2	2	1	1	1	1	1	1	2
27669	男	1	0	0	0	0	0	0	0	0	0	0	0	0	0	1	0	0	0	0	0	0	0	0	0	0	0	2	1	1	2	2	1	1	2	1	1	1	4	5	2	1	1	3	1	1	1	2	1
18201	女	1	0	0	0	0	0	0	1	0	0	0	1	0	1	1	1	1	1	1	1	1	1	1	1	1	1	3	3	2	2	3	3	2	2	2	2	3	2	1	1	3	2	2	3	2	3	1	1
18581	女	0	0	0	0	0	0	0	0	0	0	0	0	0	0	1	1	1	1	1	1	1	1	1	1	1	0	2	2	3	1	2	1	2	3	3	1	1	1	1	2	3	1	1	1	2	1	1	3
23425	女	0	0	0	0	0	0	0	0	0	0	0	0	0	0	0	0	0	0	0	0	0	0	0	0	0	0	1	1	2	2	1	1	1	1	1	1	1	1	1	1	1	1	1	2	1	1	1	1
18469	女	0	0	0	0	0	0	0	0	0	0	0	0	0	0	1	1	1	1	1	1	0	0	0	0	0	0	2	1	3	3	2	2	3	3	2	2	5	4	4	3	2	3	3	3	3	3	3	4
27002	女	1	0	0	0	0	0	0	0	0	0	0	0	0	0	1	0	0	0	0	0	0	0	0	0	0	0	1	1	2	2	2	2	1	1	2	3	1	1	1	2	2	1	1	3	1	1	1	1
23402	女	1	0	0	0	0	0	0	0	0	0	0	0	0	0	1	0	1	0	0	1	0	0	0	0	0	0	2	1	2	3	3	3	1	1	1	1	1	1	1	1	1	1	1	1	1	1	1	1
23471	男	1	0	1	0	0	0	0	0	0	0	0	0	0	0	1	1	1	1	1	1	1	1	1	1	1	1	3	5	3	3	2	2	1	2	2	2	1	1	3	2	5	1	2	2	2	1	2	3
25089	男	1	0	0	0	0	0	0	0	0	0	0	0	0	0	1	1	1	1	0	0	0	0	1	0	0	0	2	1	3	2	2	1	4	1	2	1	1	1	1	1	2	1	1	2	1	1	1	2
26902	女	0	0	0	0	0	1	0	0	0	0	0	0	0	0	1	1	1	1	1	1	1	1	1	1	1	1	3	1	3	3	4	1	2	1	2	1	1	1	1	1	2	3	4	2	1	1	2	3
28155	男	1	1	0	0	0	0	0	1	0	0	0	0	1	0	1	0	1	0	1	0	0	0	1	1	1	1	2	3	3	3	3	3	2	4	3	3	1	2	1	1	2	2	3	3	3	2	1	3
25002	女	0	0	0	0	0	0	0	0	0	0	0	0	0	0	1	1	0	1	1	1	1	1	1	1	1	1	3	3	2	3	3	3	3	3	3	2	1	1	1	3	2	3	3	3	1	1	1	1
18843	女	0	0	0	0	0	0	0	0	0	1	0	0	0	0	1	1	1	1	1	1	1	1	0	1	1	1	2	4	4	4	3	4	4	3	2	3	1	2	2	3	3	4	3	2	2	2	2	3
23491	男	0	0	0	0	1	0	0	0	0	0	0	0	0	0	1	0	1	0	0	0	0	0	0	0	0	1	2	2	3	3	3	1	3	3	3	2	1	1	1	3	3	4	1	2	2	2	1	2
19083	女	0	1	0	1	0	0	0	1	0	0	0	1	0	1	1	1	1	1	1	1	1	1	1	1	1	1	4	3	1	1	1	1	1	4	1	1	1	1	1	1	3	2	4	3	1	1	3	4
28002	女	0	0	0	0	0	0	0	0	0	0	0	0	0	0	0	0	0	0	0	0	0	0	0	1	0	0	1	1	1	1	1	1	2	1	1	1	1	2	1	1	2	1	2	1	1	1	1	1
18022	女	0	0	0	0	0	0	0	1	0	0	0	0	1	0	1	0	0	1	1	1	1	1	1	1	0	0	3	3	4	2	3	2	3	2	3	3	3	2	3	2	2	3	2	1	1	1	1	4
24781	女	0	0	0	0	1	0	0	0	0	0	0	0	0	0	0	0	0	0	0	0	0	0	0	0	0	0	2	2	2	2	1	1	1	2	2	1	1	2	2	2	2	2	1	2	1	1	1	2
18085	女	0	0	0	0	1	1	1	0	0	0	0	0	1	0	1	1	0	1	1	1	1	1	1	1	0	1	3	2	4	4	3	2	2	2	4	2	2	4	4	3	4	3	2	2	3	1	1	5
24763	女	0	0	0	0	1	0	0	0	0	0	0	0	0	0	0	0	0	0	0	0	0	0	0	0	0	0	1	1	1	2	1	1	1	1	1	1	1	1	1	1	1	3	1	1	1	1	1	2
24604	男	0	0	0	0	0	0	0	0	0	0	0	0	0	0	1	0	0	0	0	0	1	0	0	0	0	0	2	2	3	3	3	1	1	2	2	1	2	2	2	2	2	1	1	2	2	1	1	1
24771	男	0	0	0	0	0	0	0	0	0	0	0	0	0	0	0	0	0	0	0	0	0	0	0	0	0	0	1	3	3	1	2	1	2	2	3	1	1	3	3	2	2	1	1	1	1	1	1	3
17837	女	0	0	0	0	0	0	0	0	0	0	1	1	1	0	1	1	0	0	1	1	1	1	1	1	1	1	2	3	4	4	4	3	2	2	1	3	2	2	3	2	2	4	4	1	2	2	2	3
24695	女	0	0	0	0	0	0	0	0	0	0	0	0	0	0	1	1	1	1	1	0	0	0	1	0	1	0	3	2	3	2	1	3	1	1	3	1	1	1	1	2	2	2	3	1	1	2	1	2
17174	女	1	0	0	0	0	0	0	0	0	0	0	0	0	0	1	1	0	0	1	1	1	1	0	0	1	1	2	2	4	2	2	4	1	3	4	2	1	1	1	2	5	2	2	2	2	2	1	4
24999	女	1	0	0	0	0	0	0	0	0	0	0	0	0	0	1	1	1	1	1	1	1	1	0	1	1	1	3	1	3	2	1	1	1	1	3	1	1	1	3	1	2	1	1	1	1	1	1	3
25398	女	0	0	0	0	0	0	0	0	0	0	0	0	0	0	1	0	0	1	1	0	0	0	1	0	0	0	2	2	2	3	1	1	1	2	2	1	1	1	1	2	2	2	2	1	1	1	1	2
16994	女	0	0	0	0	1	0	0	0	0	0	0	0	0	0	1	1	1	1	1	1	1	1	1	1	1	1	2	2	3	1	2	1	3	3	3	1	1	1	1	1	2	3	1	1	1	1	1	1
16721	女	0	1	1	0	1	1	0	0	0	0	0	0	0	0	1	1	1	1	1	1	1	1	1	1	1	1	2	2	2	2	2	2	2	2	2	2	1	1	3	2	2	2	2	2	1	1	1	2
24804	女	0	0	0	0	0	0	0	0	0	0	0	0	0	0	1	1	1	1	0	1	0	0	1	1	0	0	2	2	2	2	3	2	1	2	3	2	2	3	3	3	2	2	3	2	3	2	2	3
24601	女	0	0	0	0	0	0	0	0	0	0	0	0	0	0	0	0	0	0	0	0	0	0	0	0	0	0	2	2	2	2	1	1	1	1	1	1	1	1	3	1	2	1	2	2	1	1	1	2
25000	女	0	0	0	0	0	0	0	0	0	0	0	0	0	0	0	0	0	0	0	1	0	0	0	0	0	0	2	2	2	2	2	2	1	1	2	2	1	1	3	1	2	1	2	1	2	2	2	2
24947	男	0	0	0	0	0	0	0	0	0	0	0	0	0	0	0	0	0	0	0	0	0	0	0	0	0	1	3	3	2	2	1	1	1	1	1	1	1	4	4	2	3	1	2	2	1	1	1	1
17841	男	1	0	0	0	0	0	0	0	0	0	0	0	0	0	1	1	1	1	1	0	1	1	1	1	1	1	2	1	2	2	3	3	5	1	2	1	1	1	1	2	2	1	1	1	1	1	1	2
17844	男	1	0	0	0	1	0	0	0	0	0	0	1	0	0	1	1	1	1	1	1	1	1	1	1	1	1	3	3	4	3	2	4	2	3	4	2	2	3	4	2	2	2	2	1	2	2	2	3
17710	女	1	0	0	0	1	0	0	0	0	0	0	0	0	0	1	0	1	0	0	0	0	0	1	1	1	0	2	2	2	3	2	2	2	4	3	1	2	3	2	3	2	4	4	2	3	4	2	5
24809	女	0	0	0	0	0	0	0	0	0	0	0	0	0	0	0	0	0	0	1	0	0	1	1	0	0	0	2	1	1	2	1	1	1	1	1	1	1	1	1	1	1	1	1	1	1	1	1	2
24593	女	0	0	0	0	0	0	0	0	0	0	0	0	0	0	0	0	0	1	0	0	0	0	1	0	0	0	3	3	4	3	3	3	3	3	3	3	4	4	5	3	3	3	2	2	2	2	2	2
25101	男	0	0	0	0	1	0	0	0	0	0	0	0	0	0	0	0	0	0	0	0	0	0	0	0	0	0	3	3	2	2	1	1	1	1	1	1	1	1	1	4	2	3	1	1	1	1	1	3
24802	男	1	0	0	0	0	0	0	0	0	0	0	0	0	0	0	0	0	0	0	0	0	0	0	0	0	0	2	1	2	2	1	1	1	1	3	1	1	1	1	1	1	1	2	3	1	1	1	3
25044	男	0	0	0	0	0	0	0	0	0	0	0	0	0	0	0	0	0	0	0	0	0	0	1	0	0	0	1	1	2	2	2	2	1	2	1	1	1	1	1	1	2	1	2	1	1	1	1	2
25076	男	1	0	0	0	0	0	0	0	0	0	0	0	0	0	1	0	0	0	0	0	0	0	0	0	0	0	2	2	3	3	2	2	2	1	2	2	1	3	3	2	2	3	2	1	3	1	2	3
17855	男	0	1	0	0	1	0	0	1	0	0	0	0	0	0	1	1	1	1	0	0	0	0	0	0	0	1	2	3	3	2	3	2	4	2	1	2	3	2	2	3	4	4	2	2	2	2	3	3
25201	女	0	0	0	0	0	0	0	0	0	0	0	0	0	0	0	1	0	0	0	1	0	0	1	0	1	0	2	2	2	3	3	1	1	1	2	2	1	1	1	2	2	2	3	2	3	1	1	2
29265	男	0	1	0	0	0	0	0	0	0	0	0	0	0	0	1	0	0	0	0	0	0	0	1	0	0	0	2	1	2	1	1	1	1	1	1	1	1	1	1	1	1	1	1	1	1	1	1	1
29004	女	0	0	0	0	1	0	0	0	0	0	0	0	0	0	0	0	0	0	0	0	0	0	0	0	0	0	1	1	1	1	1	1	1	1	1	1	1	2	2	1	1	1	1	1	1	1	1	1
16678	男	0	0	0	0	0	0	0	0	0	0	0	0	0	0	1	0	0	1	0	0	0	0	1	0	0	0	2	2	2	2	2	2	2	2	2	1	2	2	4	2	2	2	1	2	2	2	2	2
24932	男	0	0	0	0	0	0	0	0	0	0	0	0	0	0	1	1	1	1	1	1	1	1	1	1	1	0	1	1	1	1	1	1	1	1	1	1	1	1	1	1	1	1	1	1	1	1	1	1
24847	男	0	1	0	1	0	0	0	0	0	0	0	0	0	0	1	0	0	0	0	0	0	1	1	0	0	0	1	1	2	2	1	1	1	1	2	2	1	1	1	1	2	1	1	2	2	1	1	2
23982	男	0	0	0	0	0	0	0	0	0	0	0	0	0	0	0	0	0	0	0	0	0	0	0	0	0	0	1	1	1	1	1	1	1	1	1	1	1	1	1	1	1	1	1	1	1	1	1	3
24803	女	0	0	0	0	0	0	0	0	0	0	0	0	0	0	0	0	0	1	0	1	0	0	1	0	0	0	1	1	2	1	1	1	1	2	1	1	1	1	1	1	1	1	1	1	1	1	1	2
25798	男	1	0	0	0	0	0	0	0	0	0	0	0	0	0	0	0	0	0	0	0	0	0	0	0	0	0	1	1	1	2	1	1	3	3	2	2	3	3	4	2	1	2	3	2	3	3	2	2
28186	女	1	0	0	0	0	0	0	0	0	0	0	0	0	0	1	0	0	1	0	0	0	0	1	0	1	0	2	2	1	1	1	1	1	1	1	2	1	2	2	1	2	1	2	1	1	1	1	1
28677	女	0	0	0	0	0	0	0	0	0	0	0	0	0	0	0	0	0	1	0	0	0	0	1	0	0	0	2	1	1	2	1	1	1	1	2	1	1	1	1	1	1	1	1	1	1	1	1	1
29175	女	0	0	0	0	0	0	0	0	0	0	1	0	0	0	1	0	0	0	1	1	0	1	1	1	0	0	2	1	3	2	2	1	1	1	2	1	1	1	1	1	1	1	1	1	2	1	1	3
27661	男	1	1	0	1	0	0	0	0	0	0	0	0	0	0	1	0	0	1	0	0	0	1	1	0	0	0	2	2	4	3	3	2	1	1	2	3	1	1	5	2	3	1	3	1	4	1	1	1
28982	女	0	0	0	0	0	0	0	0	0	0	0	0	0	0	0	0	0	0	0	0	0	0	1	0	0	0	3	2	2	1	2	2	1	2	2	2	1	1	1	3	3	1	1	1	2	1	1	1
23694	男	1	0	0	0	0	0	0	0	0	0	0	0	0	0	1	0	1	0	0	0	0	0	0	0	0	0	3	3	2	3	3	2	1	1	1	2	1	1	1	1	3	2	1	1	2	1	2	2
26886	女	0	0	0	0	0	0	0	0	0	0	0	0	0	0	0	0	0	0	0	0	0	0	0	0	0	0	2	1	1	2	1	1	1	1	1	1	1	1	1	1	1	1	1	1	1	1	1	1
28179	男	1	0	0	0	0	0	0	0	0	0	0	0	0	0	1	1	0	0	0	0	0	0	0	0	0	0	2	1	1	1	1	1	1	1	1	1	1	1	1	1	1	1	1	1	1	1	1	1
27909	男	0	0	0	0	0	0	0	0	0	0	0	0	0	0	0	0	0	0	0	0	0	0	0	0	0	0	2	2	2	2	2	2	3	3	2	2	3	3	4	2	3	2	3	2	2	4	3	3
28312	男	0	0	0	1	0	0	0	0	0	0	0	0	0	0	1	0	0	1	0	1	1	0	0	0	0	0	3	3	1	3	1	2	4	1	3	4	1	1	1	2	3	1	3	2	3	1	1	2
27660	女	0	0	0	0	0	0	0	0	0	0	0	0	0	0	0	0	0	0	0	0	0	0	0	0	0	0	2	1	2	1	1	1	1	2	2	2	1	1	1	1	1	1	1	1	1	1	1	1
27650	男	0	0	0	0	0	0	0	0	1	0	0	0	0	0	0	0	0	0	0	0	0	0	0	0	0	0	2	1	2	1	1	1	2	2	2	1	2	2	3	2	2	2	3	2	1	1	1	1
28187	男	1	0	0	0	0	0	0	0	0	0	0	0	0	0	1	0	0	0	0	0	0	0	0	0	0	0	2	1	3	3	2	1	1	2	3	1	1	1	1	1	2	2	2	2	1	1	1	3
28196	女	0	0	0	0	0	0	0	1	0	0	0	0	0	0	0	0	0	1	0	1	0	0	0	0	0	0	2	3	3	2	1	1	1	1	2	2	1	3	4	2	2	2	2	1	2	1	1	1
28851	男	1	0	0	0	0	0	0	0	0	0	0	0	0	0	0	0	0	0	0	0	0	0	0	0	0	0	2	1	1	1	1	1	1	1	1	1	1	1	1	1	1	1	1	1	1	1	1	2
27824	女	0	0	0	0	0	0	0	0	0	0	0	0	0	0	1	0	0	1	0	0	0	1	1	0	0	0	2	2	2	3	2	1	1	1	2	1	1	1	1	2	2	2	1	2	3	3	2	2
27019	女	1	0	0	0	0	0	0	0	0	0	0	0	0	0	1	0	0	0	0	0	0	0	0	0	0	0	1	1	2	2	2	1	1	2	2	1	1	1	1	1	1	1	1	1	1	1	1	1
25862	男	0	0	0	0	0	0	0	0	0	0	0	0	0	0	1	0	0	0	0	0	0	0	0	0	0	0	1	1	1	2	2	1	1	1	1	1	1	1	1	1	1	1	1	1	1	1	1	1
27878	男	0	0	0	0	0	0	0	0	0	0	0	0	0	0	1	1	1	1	1	0	1	1	1	1	0	1	3	4	3	3	2	1	2	3	2	1	1	1	2	3	4	3	4	3	4	1	2	3
27965	女	0	0	0	0	0	0	0	0	0	0	0	0	0	0	1	0	0	0	0	0	0	0	0	0	0	0	1	1	1	2	1	1	1	2	2	1	1	1	1	2	2	1	1	1	1	1	1	2
28153	女	1	0	0	0	0	0	0	0	0	0	0	0	0	0	0	0	0	0	0	0	0	0	1	0	0	0	2	1	2	2	1	1	1	1	1	1	1	1	1	1	1	1	1	1	1	1	1	2
25488	男	0	0	0	0	0	0	0	0	0	0	0	0	0	0	0	0	0	0	0	0	0	0	0	0	0	0	3	3	3	3	3	3	3	3	3	3	3	3	3	3	3	3	3	3	3	3	3	3
28141	男	0	0	0	0	1	0	0	0	0	0	0	0	0	0	1	0	0	1	0	0	0	0	0	0	0	0	3	3	3	3	2	1	3	3	1	3	2	2	3	3	3	3	3	2	3	3	2	3
28063	女	0	0	0	0	0	0	0	0	0	0	0	0	0	0	0	0	0	0	0	0	0	0	0	0	0	0	3	3	3	3	3	3	3	3	3	3	3	3	3	3	3	3	3	3	3	3	3	3
28964	女	1	0	0	0	0	0	0	0	0	0	0	0	0	0	0	0	0	0	0	0	0	0	0	0	0	0	2	2	2	2	2	2	2	3	3	2	1	2	3	2	2	2	2	2	1	1	1	2
28740	女	0	0	0	0	0	0	0	0	0	0	0	0	0	0	1	0	0	0	0	0	0	0	0	0	0	0	2	2	2	2	2	1	1	1	1	1	1	1	1	1	1	1	2	2	1	1	1	1
28830	女	0	0	0	0	0	0	0	0	0	0	0	0	0	0	1	0	0	0	0	0	0	0	1	1	0	0	2	1	3	2	1	1	1	1	2	1	1	1	1	1	1	1	1	1	1	1	1	1
28172	男	1	0	0	0	0	0	0	0	0	0	0	0	0	0	1	0	0	0	0	0	0	0	0	0	0	0	1	1	1	1	1	1	1	1	1	1	1	1	1	1	1	1	1	1	1	1	1	1
28780	女	0	0	0	0	0	0	0	0	0	0	0	0	0	0	1	0	0	0	0	0	0	0	0	0	0	1	2	2	2	2	1	1	1	1	2	1	1	1	2	2	2	2	1	2	2	1	1	2
28779	女	1	0	0	0	0	0	0	0	0	0	0	0	0	0	0	0	0	1	0	0	0	0	1	0	0	0	2	1	1	3	2	2	1	2	2	1	1	1	1	1	1	2	3	3	1	1	1	3
27556	男	1	0	0	0	0	0	0	0	0	0	0	0	0	0	1	1	0	1	1	1	1	1	1	1	1	0	3	3	3	3	2	2	3	3	3	3	3	3	3	3	3	3	3	3	3	1	3	3
27181	男	0	0	0	0	0	0	0	0	0	1	0	0	0	0	1	0	0	1	0	0	0	0	0	0	0	0	3	3	2	3	1	1	2	3	3	1	1	1	1	2	3	2	3	2	3	4	2	3
28831	女	0	0	0	0	1	0	0	0	0	0	0	0	0	0	1	0	0	1	0	1	0	0	0	0	0	0	3	3	2	3	2	2	2	2	2	3	1	3	3	2	3	2	1	2	3	1	1	2
16557	女	0	0	0	0	0	0	0	0	0	0	0	1	0	0	1	1	1	1	1	1	1	1	1	1	1	1	4	4	4	4	1	2	1	1	3	2	1	1	1	3	4	1	1	1	1	1	1	5
28171	女	0	0	0	0	0	0	0	0	0	0	0	0	0	0	1	0	1	0	0	0	0	0	0	0	0	0	1	1	2	1	1	1	1	1	1	1	1	1	1	1	1	1	1	1	1	1	1	2
29137	男	1	1	0	0	0	0	0	0	0	0	0	0	0	0	0	0	0	0	0	0	0	0	0	0	0	0	2	2	2	2	2	2	2	2	2	2	2	2	2	2	2	2	2	2	2	2	2	2
13677	女	1	0	0	0	0	0	0	0	0	0	1	0	0	1	1	0	0	1	1	1	1	1	1	1	1	1	4	1	3	4	1	2	1	1	3	1	1	3	1	4	2	1	1	1	2	1	1	3
16212	男	1	0	0	0	0	0	0	0	0	0	0	0	0	0	1	1	1	1	1	1	1	1	1	1	1	1	3	4	4	4	3	1	1	2	4	1	3	3	3	3	4	1	3	3	4	2	1	4
16491	女	1	0	0	0	0	0	0	0	0	0	0	0	0	0	1	1	1	1	1	0	1	1	0	1	1	0	2	2	2	2	2	1	2	2	2	2	2	2	2	2	2	2	2	2	2	2	2	2
25520	女	1	0	0	0	0	0	0	0	0	1	0	0	0	0	1	1	1	0	1	0	1	1	1	1	1	1	2	1	3	1	2	2	1	1	2	1	1	1	1	1	2	1	1	1	1	1	1	3
15929	男	0	0	0	0	1	1	0	1	0	0	1	0	0	0	1	1	1	1	1	1	1	0	1	1	1	1	4	3	3	3	2	5	1	2	3	2	1	3	2	2	3	4	3	2	3	1	1	4
23029	男	1	0	0	0	0	0	0	0	0	0	0	0	0	0	0	0	0	0	0	0	0	0	0	0	0	0	2	2	2	2	2	1	1	1	2	1	1	2	2	2	2	1	1	1	2	2	2	2
16478	女	0	0	0	0	0	0	0	0	0	0	0	0	0	0	1	1	1	1	1	1	1	1	1	1	1	1	3	2	3	3	3	4	3	3	4	3	1	1	1	1	3	3	1	1	3	1	1	4
16001	男	1	0	0	0	0	0	0	0	0	0	0	0	0	0	1	1	0	1	1	1	1	0	1	0	1	1	2	2	3	3	2	2	3	2	2	2	1	4	4	2	3	2	3	1	2	2	2	3
23072	女	1	0	0	0	0	0	0	0	0	0	0	0	0	0	1	1	1	1	1	0	0	0	1	0	1	1	4	3	2	4	3	1	1	2	2	2	3	4	5	2	2	1	3	1	1	1	1	4
15428	男	1	0	0	0	0	1	0	0	0	1	0	1	0	0	1	1	1	1	1	1	1	1	1	1	1	1	2	2	2	2	2	2	4	1	2	1	1	1	1	1	2	1	1	1	2	1	1	1
23002	女	1	0	0	0	0	0	0	0	0	0	0	0	0	0	0	0	0	0	0	0	0	0	0	0	0	0	2	2	2	2	2	2	2	2	2	2	2	2	2	2	2	2	2	2	2	2	2	2
23669	女	0	0	0	0	0	0	0	0	0	0	0	0	0	0	0	0	0	0	0	0	0	0	1	0	0	0	1	1	1	1	1	1	1	1	1	1	1	2	2	1	1	1	1	1	1	1	1	1
24738	男	0	0	0	0	0	0	0	0	0	0	0	0	0	0	1	0	0	0	0	0	0	0	1	0	1	0	2	2	1	1	1	1	1	1	1	1	1	1	1	2	2	1	1	1	1	1	1	2
28905	男	0	0	0	1	1	0	0	0	0	0	0	0	0	0	0	0	0	0	0	0	0	0	0	0	0	0	2	1	2	2	1	1	1	3	1	1	1	1	1	1	1	2	4	1	1	1	1	1
24775	女	0	0	0	0	0	0	0	0	0	0	0	0	0	0	1	0	0	0	0	0	0	0	0	0	0	0	2	2	2	2	3	2	5	4	2	2	4	3	3	2	2	2	2	1	2	2	2	2
28823	女	0	0	0	0	0	0	0	0	0	0	0	1	0	1	1	0	0	1	0	0	0	0	0	1	0	0	2	1	3	3	2	3	3	3	3	3	3	3	3	2	3	1	3	3	3	1	2	3
16512	男	0	0	0	0	1	0	0	0	0	0	0	0	1	1	1	0	1	1	0	0	1	1	1	0	1	1	4	3	3	3	2	2	3	3	2	3	4	4	5	3	2	3	2	4	4	4	4	4
29173	男	1	0	0	0	0	0	0	0	0	0	0	0	0	0	0	0	0	0	0	0	0	0	0	0	0	0	2	1	1	1	1	1	1	1	1	1	1	1	1	1	1	1	1	1	1	1	1	1
28343	女	0	0	0	0	0	0	0	0	0	0	0	0	0	0	1	0	0	1	0	0	0	0	0	1	0	0	3	3	2	3	2	1	3	2	2	2	1	1	1	2	3	1	1	2	3	2	3	3
29153	男	0	0	0	0	0	0	0	0	0	0	1	0	0	0	1	0	0	1	1	1	0	0	1	0	0	0	3	4	2	3	3	2	1	2	3	2	1	1	3	3	2	3	3	1	3	1	3	4
29144	女	1	0	0	0	0	0	0	0	0	0	0	0	0	0	1	0	0	1	1	0	1	1	1	1	0	0	2	2	2	2	2	2	2	2	2	2	2	2	2	2	2	2	2	1	3	4	2	3
29180	男	1	0	0	0	0	0	0	0	0	0	0	0	0	0	1	1	0	0	1	0	0	0	0	0	0	0	3	2	3	3	3	3	3	3	3	3	3	3	3	3	3	3	3	3	3	3	3	3
23019	男	1	0	0	0	0	0	0	0	0	0	0	0	0	0	0	0	0	0	0	0	0	0	0	0	0	0	1	1	1	1	1	1	1	1	1	1	1	1	1	1	1	1	1	1	1	1	1	1
23850	女	0	0	0	0	0	0	0	0	0	0	0	0	0	0	1	0	1	1	1	1	1	0	1	1	1	0	4	3	3	3	3	2	4	2	2	2	2	3	4	2	4	2	3	2	3	2	2	3
28220	女	0	0	0	0	0	0	0	0	0	0	0	0	0	0	0	0	0	0	0	0	0	0	0	0	0	0	1	2	2	2	2	2	1	2	2	2	1	1	3	3	2	2	2	2	2	2	2	2
28621	女	0	0	0	0	0	0	0	0	0	0	0	0	0	0	1	0	0	0	0	0	0	0	0	0	0	0	2	1	2	2	2	1	1	1	1	1	1	1	2	1	1	1	1	1	1	1	1	1
28867	男	0	0	0	0	0	0	0	0	0	0	0	0	0	0	1	0	0	0	0	0	0	0	0	0	0	0	1	1	2	2	1	2	2	1	2	2	1	1	1	2	2	1	1	1	1	1	1	1
28474	男	1	0	0	0	1	0	0	0	0	0	0	0	0	0	0	0	0	0	0	0	0	0	0	0	0	0	1	1	1	1	1	1	1	1	1	1	1	1	1	1	1	2	1	1	1	1	1	2
25180	男	1	0	0	0	0	0	0	0	0	0	0	0	0	0	1	0	0	0	0	0	0	0	0	0	0	0	2	2	2	2	1	1	2	2	2	1	1	3	3	2	2	2	2	2	2	2	2	2
24772	女	0	0	0	0	0	0	0	0	0	0	0	0	0	0	0	0	1	0	0	0	0	0	1	0	0	0	1	1	2	2	2	2	1	1	2	1	1	1	1	2	2	2	2	2	1	1	1	3
23304	男	1	1	1	0	0	0	0	0	0	0	0	0	0	0	0	0	0	0	0	0	0	0	0	0	0	0	1	1	1	1	1	1	1	1	1	1	1	1	1	1	1	1	1	1	1	1	1	1
24788	女	0	1	0	0	0	0	0	0	0	0	0	0	0	0	1	1	1	1	1	1	1	0	1	1	1	1	3	2	3	3	3	2	1	2	2	1	1	1	1	3	3	2	3	3	2	1	1	3
24782	女	0	0	0	0	1	0	0	0	0	0	0	0	0	0	1	1	0	1	0	0	0	0	1	0	0	0	2	2	2	2	2	2	1	2	2	1	1	1	2	2	2	2	1	2	1	1	1	2
24756	男	0	0	0	0	0	0	0	0	0	0	0	0	0	0	1	0	1	1	1	0	1	1	0	0	0	0	2	2	3	2	1	2	2	1	1	1	1	1	2	2	2	2	2	1	1	1	1	2
24777	男	1	0	0	0	1	0	0	0	0	0	0	0	0	0	0	0	0	0	0	0	0	0	0	0	0	0	2	2	1	2	1	1	2	2	2	2	1	2	3	2	2	2	2	1	2	1	1	2
23150	男	1	0	0	0	0	0	0	0	0	0	0	0	0	0	1	0	0	0	0	0	0	0	0	0	0	0	2	1	2	1	1	1	1	1	1	1	1	1	3	1	1	1	2	1	1	1	1	1
19036	男	0	1	1	0	0	1	0	1	1	0	0	0	0	0	1	1	0	1	1	1	1	1	1	1	1	1	2	2	2	2	2	2	2	2	2	2	1	1	1	2	2	2	2	1	2	2	1	2
16355	女	1	0	0	0	0	0	0	0	0	0	0	0	0	0	1	1	0	1	0	1	1	1	1	0	1	0	2	3	2	2	2	2	3	2	2	2	2	1	1	1	1	1	1	1	1	1	1	1
14444	女	1	1	0	0	0	1	0	1	0	0	0	1	0	0	1	1	0	1	1	1	1	1	1	1	1	0	2	2	2	4	3	3	1	3	3	1	1	1	1	1	2	2	1	2	1	1	1	3
24598	男	1	0	0	0	0	0	0	0	0	0	0	0	0	0	1	0	0	0	0	0	0	0	0	0	0	0	1	1	3	1	1	1	1	1	1	1	1	1	1	1	1	1	1	1	1	1	1	1
29132	男	0	0	0	0	0	0	0	0	0	0	0	0	0	0	1	0	0	1	0	0	0	0	0	0	0	0	2	2	2	2	2	1	1	2	3	2	1	1	1	2	1	2	2	2	1	1	1	2
27888	女	1	0	0	0	0	0	0	0	0	0	0	0	0	0	0	0	0	0	0	0	0	0	0	0	0	0	2	2	3	3	2	2	2	3	3	3	1	3	4	2	2	2	2	2	3	1	1	3
29151	男	1	0	0	0	0	0	0	0	0	0	0	0	0	0	1	0	0	1	0	1	0	0	0	0	0	0	1	1	3	2	1	1	1	1	2	1	1	3	1	2	2	3	1	1	2	2	2	2
28994	女	0	0	0	0	0	0	0	0	0	0	0	0	0	0	1	1	0	1	1	1	1	1	1	1	0	1	3	2	2	2	2	3	1	1	2	1	1	1	3	2	2	1	2	1	1	1	1	2
7665	男	1	0	0	0	0	0	0	0	0	0	0	0	0	0	1	1	0	0	0	1	1	1	1	1	1	1	3	1	2	4	2	1	1	2	2	2	2	3	5	3	3	2	2	1	3	3	3	3
27742	女	1	0	0	0	0	0	0	0	0	0	0	0	0	0	1	1	1	1	0	1	0	0	0	0	0	0	2	1	1	1	1	1	1	1	1	1	1	1	4	1	1	2	2	1	1	1	2	1
25850	女	1	0	0	0	0	0	0	0	0	0	0	0	0	0	1	1	0	0	0	1	0	0	1	0	1	0	2	2	2	2	2	2	3	1	2	1	1	1	2	2	2	1	1	3	2	1	1	3
29289	女	1	0	0	0	0	0	0	0	0	0	0	0	0	0	1	1	1	1	0	0	1	0	1	0	0	0	3	3	2	2	1	2	1	1	2	2	1	3	4	2	2	1	1	2	3	3	1	2
29174	男	1	0	0	0	0	0	0	0	0	0	0	0	0	0	1	1	1	1	1	1	1	1	1	1	1	1	3	3	3	3	3	2	2	2	3	2	5	5	5	3	4	5	5	2	2	4	3	3
29290	女	0	1	0	0	0	0	0	0	0	0	0	0	1	0	1	1	1	1	1	1	0	0	1	1	1	1	2	3	3	3	2	2	3	1	2	2	1	2	1	2	4	3	3	2	3	1	1	2
27526	女	0	0	0	0	0	0	0	0	0	0	0	0	0	0	1	0	1	1	1	1	0	1	1	0	0	0	2	2	2	2	2	2	2	2	2	2	2	2	2	2	2	2	2	2	2	2	2	2
29116	女	1	0	1	0	1	0	0	0	0	0	1	0	1	0	1	1	0	1	1	0	0	0	1	1	1	0	4	3	2	3	4	3	4	2	2	3	1	1	1	1	4	3	4	2	4	2	1	3
29323	男	1	0	0	0	0	0	0	0	0	0	0	0	0	0	0	0	0	0	0	0	0	0	0	0	0	0	2	1	2	1	1	1	1	1	2	1	1	1	2	1	1	1	1	1	1	1	1	1
29320	女	1	0	0	0	0	0	0	0	0	0	0	0	0	0	1	1	1	1	1	0	0	0	0	0	0	0	1	1	2	2	2	1	1	1	1	1	1	1	2	1	1	1	1	1	1	2	1	1
14884	女	0	0	0	0	0	0	0	0	0	0	1	0	0	0	1	1	1	1	1	0	1	1	1	1	0	0	3	3	3	3	3	3	3	3	3	3	3	3	3	3	3	1	3	3	3	3	3	3
28596	男	1	1	0	0	0	0	0	0	0	0	0	0	0	0	1	1	0	0	0	0	0	0	1	0	0	0	2	1	3	2	2	2	2	3	3	3	3	3	4	3	3	3	3	3	3	2	2	3
23070	女	0	0	0	0	0	0	0	0	0	0	0	0	0	0	0	0	0	0	0	0	0	0	1	0	0	0	2	1	2	2	3	1	1	2	2	1	3	3	2	1	2	1	2	2	1	1	1	1
29176	男	0	0	0	0	0	0	0	0	0	0	0	0	0	0	0	0	1	0	0	1	1	0	0	0	0	0	2	2	2	2	1	2	2	2	2	2	2	2	2	2	2	2	2	2	2	4	2	3
28934	女	1	0	0	0	0	0	0	0	0	0	0	0	0	0	1	1	0	1	0	1	1	1	1	0	1	0	2	2	3	1	1	2	1	1	2	1	1	1	1	1	2	1	2	1	2	2	1	3
29154	女	0	0	0	0	1	0	0	0	0	0	0	0	0	0	0	0	1	0	0	0	0	0	0	1	0	0	2	2	1	2	1	1	1	1	1	1	1	4	3	2	2	2	1	2	1	1	1	1
28279	男	0	0	0	0	0	0	0	0	0	0	0	0	0	0	1	0	0	0	0	0	0	0	0	0	0	0	1	1	2	1	1	2	2	1	2	2	3	2	3	4	2	2	1	2	1	1	1	1
29064	男	1	0	1	0	1	0	0	1	0	0	0	0	0	0	1	0	0	0	0	0	0	0	0	0	0	0	2	1	3	2	1	2	1	1	3	1	1	1	1	1	2	4	1	1	1	1	1	1
29293	男	1	0	0	0	0	0	0	0	0	0	0	0	0	0	0	0	0	0	0	0	0	0	0	0	0	0	2	2	2	2	1	1	1	1	2	1	1	1	1	1	1	1	1	1	1	1	1	2
25960	男	1	0	0	0	0	0	0	0	0	0	0	1	0	0	1	1	0	0	1	0	1	0	1	1	1	1	2	2	4	2	3	1	1	1	3	1	1	1	2	3	5	2	3	3	4	3	3	4
28488	女	1	0	0	0	0	0	0	0	0	0	0	0	0	0	0	0	0	0	0	0	0	0	0	0	0	0	2	1	2	2	1	1	1	2	2	1	1	1	3	1	2	2	2	2	1	1	1	3
28018	女	1	0	0	0	0	0	0	0	0	0	0	0	0	0	1	0	0	0	0	0	0	0	0	0	1	0	2	2	2	3	2	2	1	1	2	1	1	1	2	3	2	2	4	1	2	1	1	2
26496	男	0	0	0	0	0	0	0	0	0	0	0	0	0	0	0	0	0	0	0	0	0	0	1	1	0	0	1	2	3	2	2	1	1	1	2	1	1	1	2	1	2	2	1	2	1	1	1	3
29020	女	0	0	0	0	0	0	0	0	0	0	0	0	0	0	0	0	1	0	0	1	1	0	1	0	0	0	2	1	2	1	1	2	1	1	3	2	1	2	2	2	2	1	2	2	2	1	1	2
28753	女	0	0	0	0	0	0	0	1	0	0	0	0	0	0	1	0	0	0	0	0	0	0	0	0	0	0	2	2	2	2	1	1	1	1	1	1	1	1	1	1	1	1	1	1	2	1	1	1
29141	女	0	0	0	0	0	0	0	0	0	0	0	0	0	0	0	0	0	1	0	0	1	0	1	1	0	0	2	1	1	1	1	1	1	1	2	1	1	1	1	2	2	1	2	1	1	1	1	2
27877	女	1	0	0	0	0	1	0	0	0	0	0	0	0	0	1	1	1	1	1	0	1	1	1	1	1	0	3	3	4	3	4	2	3	4	4	3	3	4	5	2	3	3	4	4	4	5	3	4
26095	男	0	0	0	0	0	0	0	0	0	0	0	0	0	0	0	0	1	0	1	1	1	0	1	0	1	1	2	1	3	1	2	2	2	3	2	1	1	1	1	1	1	2	2	1	1	1	1	1
29143	男	0	0	0	0	0	0	0	0	0	0	0	0	0	0	1	1	1	1	0	0	1	0	0	0	1	0	2	2	3	3	2	1	2	3	3	2	3	3	4	2	1	2	3	2	3	3	3	3
29190	女	1	0	0	0	0	0	0	0	0	0	0	0	0	0	0	0	0	0	0	0	0	0	0	0	0	0	2	1	2	2	1	1	1	1	2	1	1	1	2	2	2	1	1	1	1	1	1	1
29286	女	0	0	0	0	0	0	0	0	0	0	0	0	0	0	0	0	1	0	0	0	0	1	0	0	0	0	2	2	1	2	2	2	1	2	3	1	1	1	1	1	2	1	3	1	1	2	1	1
23059	女	0	0	1	0	1	0	0	0	0	0	1	0	0	0	0	0	1	0	1	1	0	1	1	1	0	0	2	2	2	1	1	2	1	1	3	1	1	4	4	2	2	4	2	2	2	3	3	3
19041	男	0	0	0	0	1	0	0	0	0	0	0	0	0	1	1	1	0	0	1	1	0	0	1	1	1	1	1	2	3	1	3	1	1	1	1	1	1	3	1	1	1	2	3	1	1	1	1	2
29127	男	0	0	0	0	0	0	0	0	0	0	0	0	0	0	1	1	0	1	1	0	0	0	1	0	0	0	1	1	1	1	1	1	1	1	1	1	1	1	1	1	1	1	1	1	1	1	1	1
29301	男	1	0	0	0	0	0	0	0	0	0	0	0	0	0	1	0	1	0	0	0	0	0	0	0	0	0	2	1	2	2	2	2	1	2	2	2	2	2	3	2	2	2	2	2	2	3	2	2
28271	女	0	0	0	0	0	0	0	0	0	0	1	0	0	0	0	0	0	0	0	0	0	0	0	0	0	0	2	1	2	2	1	1	1	1	1	1	1	3	3	1	1	1	2	1	1	1	1	2
29258	男	0	0	0	0	1	0	0	0	0	0	0	0	0	0	1	0	0	1	0	0	0	0	0	0	0	0	2	1	1	2	2	2	2	1	2	1	1	1	1	1	1	1	1	1	1	1	1	2
29017	男	0	0	0	0	1	0	0	0	0	0	0	0	0	0	1	1	1	1	1	1	1	1	1	1	0	0	2	2	2	2	1	1	2	1	1	1	1	1	2	1	3	3	1	1	1	1	1	1
15941	男	1	0	0	0	0	0	0	0	0	0	0	0	0	0	1	1	0	1	1	0	0	0	0	1	1	0	3	1	1	1	4	1	4	1	2	1	1	1	1	1	1	1	1	1	1	1	1	1
29149	男	0	0	0	0	0	0	0	0	0	0	0	0	0	0	1	1	1	1	0	0	0	0	1	0	0	0	2	3	2	2	1	1	2	2	2	2	1	1	1	2	2	1	2	2	2	2	2	2
29062	男	1	0	0	0	1	0	0	0	0	0	0	0	0	0	1	1	0	0	0	0	0	0	0	0	0	0	1	1	2	2	1	1	2	2	2	1	1	2	3	1	1	1	1	1	1	1	1	2
28984	男	0	0	0	0	0	0	0	0	0	0	0	0	0	0	0	0	0	0	1	0	0	0	0	0	0	0	2	2	2	2	1	1	1	1	2	1	1	1	2	1	1	2	1	1	1	1	1	2
28945	女	0	0	0	0	0	0	0	0	0	0	0	0	0	0	0	0	0	0	0	0	0	0	1	0	0	0	1	1	2	1	1	1	1	1	1	1	1	1	1	1	1	1	1	1	1	1	1	1
28995	男	0	0	0	0	0	0	0	0	0	0	0	0	0	0	0	0	0	0	0	0	0	0	1	0	0	0	2	2	2	2	1	1	1	1	1	1	1	2	2	2	2	1	1	1	1	1	1	2
23403	女	1	0	0	0	0	0	0	1	0	0	0	0	0	0	0	0	1	1	0	0	0	0	1	0	0	0	1	1	2	2	1	1	2	1	1	1	1	2	3	1	2	1	2	1	1	2	1	1
29077	男	0	0	0	0	0	0	0	0	0	0	0	0	0	0	1	0	0	0	0	0	0	0	0	0	0	0	3	3	3	2	1	1	2	1	1	1	1	1	1	1	2	1	1	2	3	3	1	1
24086	女	1	0	0	0	0	0	0	0	0	0	0	0	0	0	0	0	0	1	0	0	0	0	1	0	0	0	2	1	3	3	1	2	1	1	2	1	1	1	1	1	1	1	1	1	1	1	1	1
28944	男	1	0	0	0	0	0	0	0	0	0	0	0	0	0	1	1	1	0	1	0	1	1	1	0	0	0	1	1	2	1	1	1	1	1	1	1	1	1	1	1	2	1	1	1	1	1	1	1
29159	男	1	0	0	0	0	0	0	0	0	0	0	0	0	0	0	0	0	0	0	0	0	0	0	0	0	0	1	1	3	1	1	1	1	2	1	1	1	1	3	1	1	1	1	1	1	1	1	2
24114	女	0	0	0	0	0	0	0	0	0	0	0	0	0	0	0	0	0	1	0	0	0	0	0	0	0	0	1	1	1	1	1	1	1	1	1	1	1	1	1	1	1	1	1	2	1	1	1	1
29111	女	0	0	0	0	0	0	0	0	0	0	0	0	0	0	1	0	0	0	0	0	0	0	0	0	0	0	2	2	2	2	2	2	2	1	2	1	1	1	3	2	2	1	1	2	1	1	1	2
28056	男	1	0	0	0	0	0	0	0	0	0	0	0	0	0	1	1	0	1	1	1	1	1	1	1	1	1	2	1	1	1	1	1	1	1	1	1	1	1	1	1	1	1	1	1	1	1	1	1
24794	女	0	0	0	0	0	0	0	0	0	0	0	0	0	0	0	0	0	0	0	0	0	0	0	0	0	0	1	1	2	1	1	1	1	1	1	1	1	1	1	1	1	1	1	1	1	1	1	1
25922	女	1	0	0	0	0	0	0	0	0	0	0	0	0	0	0	0	0	0	0	0	0	0	0	0	0	0	2	2	2	2	2	1	1	1	2	1	1	1	1	1	2	1	1	2	1	1	1	1
16279	男	1	0	0	0	0	0	0	1	0	0	0	0	0	0	1	1	1	1	1	1	1	0	1	1	1	1	2	3	3	3	3	3	3	3	3	2	1	2	2	2	2	2	3	2	2	1	1	3
24413	女	1	0	0	0	0	0	0	0	0	0	0	0	0	0	0	0	0	1	0	0	1	0	1	0	0	0	2	2	4	4	2	4	3	2	4	2	1	4	3	4	4	2	3	2	1	1	1	4
23069	男	1	0	0	0	0	0	0	0	0	0	0	0	0	0	0	0	0	0	0	0	0	0	0	0	0	0	2	1	2	2	1	2	2	2	2	2	1	2	2	2	3	2	3	2	1	1	1	2
25586	男	1	0	0	0	1	0	0	0	0	0	0	0	0	0	1	0	1	0	0	0	0	0	0	0	0	1	1	1	2	3	1	2	2	3	3	3	2	1	2	2	2	3	2	2	2	1	1	2
28160	男	0	0	0	0	0	0	0	0	0	0	0	0	0	0	1	1	1	1	1	1	1	0	0	0	0	0	2	2	3	2	2	1	2	2	2	2	1	1	1	2	3	2	2	1	2	1	1	1
23757	男	0	0	0	0	0	1	0	0	0	0	0	0	0	0	0	0	0	0	0	0	0	0	0	0	0	0	2	2	2	2	2	2	2	2	2	2	2	2	2	2	2	2	2	2	1	3	2	3
28337	女	0	0	0	0	0	0	0	0	0	0	0	0	0	0	0	0	0	0	0	0	0	0	0	0	0	0	1	1	3	2	1	1	1	3	3	1	2	1	1	1	1	1	1	2	1	1	1	2
23596	男	0	0	0	0	0	0	0	0	0	0	0	0	1	0	1	0	0	0	0	0	0	0	0	0	0	0	2	1	2	2	2	1	1	1	1	1	1	1	1	1	1	1	1	2	1	1	1	2
23074	男	0	0	0	0	0	0	0	0	0	0	0	0	0	0	1	1	0	0	1	1	1	0	1	0	0	1	2	2	1	2	2	2	1	1	2	1	1	3	1	2	3	1	1	3	3	1	1	3
29069	女	0	0	0	0	0	0	0	0	0	0	0	0	0	0	0	0	1	0	1	0	0	0	0	0	0	1	3	2	4	2	1	3	1	1	4	1	1	1	1	3	3	1	3	3	3	3	1	2
29169	男	1	0	1	0	0	0	0	0	0	0	0	0	0	0	1	0	0	0	0	0	0	0	1	0	0	0	1	2	1	1	1	1	2	1	1	1	1	1	1	1	1	1	1	1	1	1	1	1
29178	女	1	0	1	0	1	0	0	0	0	0	0	0	0	0	1	0	0	0	0	0	0	0	1	0	0	0	2	2	2	2	2	2	1	3	3	2	1	2	3	2	2	2	2	2	2	2	2	3
28801	男	1	0	0	0	1	0	0	0	0	0	0	0	0	0	0	0	0	0	0	0	0	0	0	0	0	0	2	1	2	1	1	1	1	2	2	1	1	1	1	1	1	3	1	2	1	1	1	2
29388	男	0	0	0	1	0	0	0	0	0	0	0	0	0	0	1	0	1	1	0	0	1	0	1	1	1	0	2	3	2	2	2	2	2	2	2	2	4	3	4	2	3	3	3	3	3	3	3	2
28893	男	0	0	0	0	0	0	0	0	0	0	0	0	0	0	0	0	1	1	1	0	0	0	1	0	0	0	3	3	2	2	1	1	1	2	1	1	1	1	1	1	2	1	1	1	2	1	1	2
28603	女	1	0	0	0	1	0	0	0	0	0	0	0	0	0	0	0	0	0	0	0	0	0	0	0	0	0	1	1	1	1	1	1	1	1	1	1	1	1	1	1	1	1	1	1	1	1	1	1
28886	女	0	0	0	0	0	0	0	0	0	0	0	0	0	0	1	1	1	1	1	1	1	1	1	1	0	0	1	1	1	1	1	1	2	2	2	1	1	1	1	1	1	1	1	2	1	1	1	1
16972	男	0	1	0	0	0	1	0	1	0	0	0	0	1	0	1	1	0	1	1	1	1	1	1	0	1	1	3	2	3	3	3	3	3	3	3	3	1	3	1	2	2	3	4	3	1	1	3	3
17081	男	0	0	0	0	0	0	0	0	0	0	0	0	0	0	1	1	0	1	0	1	0	0	0	0	0	1	3	2	3	2	3	2	3	2	3	3	1	3	3	2	2	3	3	2	3	2	2	2
28202	女	0	0	0	0	0	0	0	0	0	0	0	0	0	0	0	0	0	0	0	0	0	0	0	0	0	0	2	1	1	2	2	2	1	1	2	1	1	1	2	1	2	1	2	1	1	1	1	1
16915	男	0	0	0	0	0	0	0	0	1	0	0	0	0	1	0	0	0	1	0	0	0	0	1	0	0	0	3	3	2	2	1	1	5	2	2	1	1	2	3	2	2	2	2	2	2	2	2	2
28978	女	0	0	0	0	0	0	0	0	0	0	1	0	0	0	1	0	1	1	1	1	1	0	1	1	0	1	2	2	2	2	1	1	1	2	1	2	2	2	3	2	3	1	2	2	2	1	1	1
17066	男	1	0	0	0	0	0	0	0	0	0	0	0	0	0	1	1	1	1	1	1	1	1	1	1	1	1	4	3	3	3	4	1	1	3	3	1	1	1	1	1	5	3	1	1	1	1	1	5
17151	女	0	0	0	0	0	0	0	0	0	0	0	0	1	0	1	1	1	1	0	0	1	1	1	1	0	0	3	3	2	3	2	2	3	2	2	2	4	3	3	2	2	3	3	2	3	2	2	2
17097	女	0	0	0	0	0	0	0	0	0	0	1	1	0	1	1	1	1	1	1	1	1	1	1	1	0	1	2	1	2	2	4	1	5	2	2	1	1	1	1	1	1	1	2	1	1	1	1	3
27535	男	0	0	0	0	1	0	0	0	0	0	0	0	0	0	1	1	1	1	0	1	0	0	1	1	1	0	3	2	2	2	3	2	3	2	2	2	1	4	4	2	2	3	3	2	1	1	1	3
16987	女	0	0	0	0	1	0	0	1	0	0	0	0	0	1	1	0	0	0	1	1	1	1	1	0	0	0	2	3	2	2	2	2	1	3	2	1	1	1	1	1	1	3	2	2	1	1	1	2
15810	男	1	0	1	0	1	0	0	0	0	0	0	0	0	0	1	1	0	1	1	1	1	1	1	0	1	1	2	3	4	3	3	2	1	3	3	3	1	1	3	2	3	3	3	2	2	1	2	3
26193	男	0	1	0	1	1	0	0	0	0	0	0	0	0	0	0	0	0	0	0	0	0	0	0	0	0	0	2	1	2	2	1	1	1	1	1	1	1	1	3	3	2	2	3	1	2	2	2	2
16837	女	0	0	0	0	0	0	0	0	0	0	0	0	0	0	1	1	1	1	1	1	1	1	1	1	1	1	2	2	2	2	2	2	2	2	2	2	4	4	4	2	2	3	3	3	2	3	2	2
15642	女	1	1	0	1	0	0	0	0	0	0	0	0	0	0	1	1	0	0	1	1	1	1	1	1	1	1	3	3	3	3	3	2	1	2	2	2	1	4	4	2	3	2	3	2	2	2	2	4
18376	男	0	0	0	0	0	0	0	0	0	0	0	0	0	0	1	0	0	1	0	0	0	1	1	0	1	1	2	2	3	2	3	3	3	3	3	2	2	3	4	2	3	1	2	2	3	3	3	3
17133	女	1	0	0	0	0	0	0	0	1	1	0	1	0	0	1	1	1	1	1	1	1	1	1	1	1	1	3	3	3	3	2	3	2	2	2	3	1	2	2	2	2	2	2	3	3	2	2	3
29201	女	0	0	0	0	1	0	0	0	0	0	0	0	0	0	0	0	0	0	0	0	0	0	0	0	0	0	1	1	2	2	1	2	1	1	1	1	1	1	1	1	1	1	1	2	1	1	2	2
16909	女	1	0	0	0	0	0	0	0	0	0	0	0	1	1	1	1	1	1	1	1	1	1	1	1	1	1	1	1	3	3	3	2	3	2	2	1	1	1	1	2	3	1	1	2	3	1	1	2
27405	女	1	0	0	0	1	0	0	0	0	0	0	0	0	0	0	0	0	0	0	0	0	0	0	0	0	0	1	1	1	3	1	1	1	1	2	1	1	1	1	1	1	2	1	1	1	1	1	1
29150	女	0	0	0	0	0	0	0	0	0	0	0	0	0	0	0	0	0	0	0	0	0	0	0	0	0	0	2	2	2	2	2	1	2	1	2	1	2	1	1	1	2	2	2	2	2	2	2	2
23889	男	0	0	0	0	0	0	0	0	0	0	0	0	0	0	0	0	0	0	0	0	0	0	0	0	0	0	1	1	1	1	1	1	1	1	1	1	1	1	1	1	1	1	1	1	1	1	1	1
17172	女	0	0	0	0	0	0	0	0	0	0	0	0	0	0	1	1	0	1	1	1	1	0	1	0	1	0	2	3	3	4	2	2	2	2	2	2	1	1	1	2	4	1	2	2	2	1	2	3
29118	女	0	0	0	0	1	0	0	0	0	0	0	0	0	0	0	0	0	0	0	0	0	0	0	0	0	0	2	2	2	2	1	1	2	1	2	1	1	3	3	2	2	1	2	2	2	1	1	2
16729	男	0	1	0	0	0	0	0	1	0	0	1	1	0	0	1	1	0	1	1	1	1	1	1	1	1	1	3	3	2	2	1	1	4	1	1	1	1	1	1	1	3	2	2	1	2	2	1	2
29005	女	0	0	0	0	0	0	0	0	0	0	0	0	0	0	1	0	0	0	1	1	0	0	1	0	1	0	3	3	1	3	1	1	1	2	2	1	1	1	3	2	2	3	2	1	1	1	1	1
29203	女	1	0	0	0	0	0	0	0	0	0	0	0	0	0	1	0	0	0	0	0	1	0	0	0	0	0	1	1	3	2	2	2	2	3	3	2	1	2	3	2	3	2	2	2	3	1	1	3
29148	女	0	0	0	0	0	0	0	0	0	0	0	0	0	0	1	0	0	1	0	1	0	0	0	0	0	0	2	1	2	2	2	1	2	2	2	1	1	1	1	1	1	1	1	1	1	1	1	1
17149	男	1	0	0	0	0	0	0	1	0	1	0	0	0	0	1	1	1	0	1	1	1	0	1	0	1	0	1	2	4	3	1	2	1	1	1	1	2	2	3	3	2	2	5	1	3	1	1	4
28612	女	0	0	0	0	0	0	0	0	0	0	0	0	0	0	0	0	0	0	0	0	0	0	0	0	0	0	1	1	1	1	1	1	1	1	1	1	1	1	1	1	1	1	1	1	1	1	1	1
28604	女	0	0	0	0	0	0	0	0	0	0	0	0	0	0	0	0	0	0	0	0	0	0	0	0	0	0	2	1	2	2	2	2	1	1	2	1	1	1	3	1	1	1	1	1	2	1	1	2
29386	男	1	0	0	0	0	0	0	0	0	0	0	0	0	0	1	1	1	1	1	1	1	0	1	0	1	1	3	4	3	2	3	2	3	1	1	2	1	3	4	2	2	2	1	1	3	3	2	4
29006	男	1	0	0	0	0	0	0	0	0	0	0	0	0	0	0	0	0	0	0	0	0	0	1	0	0	0	5	2	2	2	2	2	2	2	2	2	2	2	3	2	2	1	2	2	2	2	2	2
28784	女	0	0	0	0	0	0	0	0	0	0	0	0	0	0	1	0	1	1	0	1	1	0	1	0	0	1	2	2	2	3	1	1	2	2	3	2	2	2	3	3	3	1	1	1	1	1	1	1
29206	女	1	0	0	0	0	0	0	0	0	0	0	0	0	0	0	0	0	0	0	0	0	0	0	0	0	0	2	2	2	2	2	2	1	1	2	1	1	1	2	1	2	2	2	2	2	1	1	2
16942	女	0	0	0	0	0	0	0	0	0	0	0	0	0	0	1	1	1	1	1	1	1	1	1	1	1	1	2	2	3	2	2	2	1	2	1	1	1	1	1	1	3	2	2	1	1	1	1	1
23404	女	0	0	0	0	0	0	0	0	0	0	0	0	0	0	1	0	1	1	0	0	0	0	0	0	0	0	3	3	2	3	1	1	2	1	1	1	1	1	1	2	2	2	1	1	1	1	2	2
17307	女	0	0	0	0	0	0	0	0	0	0	0	0	0	0	1	1	0	0	1	0	0	0	0	0	0	0	2	3	3	3	2	3	2	3	4	2	3	2	3	2	3	3	2	2	3	3	3	3
29380	男	0	0	0	0	1	0	0	0	0	0	0	0	0	0	0	0	1	1	0	0	1	1	0	0	0	1	2	2	1	2	1	1	1	1	1	1	1	2	2	2	2	1	1	2	2	2	2	2
29002	男	0	0	0	0	1	0	0	0	0	0	0	0	0	0	1	0	0	1	1	0	0	0	0	0	0	0	3	3	3	2	1	1	1	2	2	1	1	1	1	1	1	2	2	1	1	1	1	1
28802	女	1	0	0	0	0	0	0	0	0	0	0	0	0	0	0	0	0	0	0	0	0	0	0	0	0	0	1	1	1	1	1	1	1	1	1	1	1	1	2	1	1	1	1	1	1	1	1	1
17340	男	0	0	0	0	1	0	0	1	0	0	0	0	1	1	1	0	0	1	1	0	0	0	1	0	1	0	3	2	2	2	2	1	4	2	2	1	3	4	3	2	2	1	3	2	2	1	1	2
27717	男	1	0	0	0	0	0	0	0	0	0	0	0	0	0	1	0	1	1	1	0	1	1	1	1	1	0	2	1	2	1	1	1	2	1	1	1	1	1	1	1	1	1	1	1	1	1	1	1
29054	男	0	0	0	0	0	0	0	0	0	0	0	0	0	0	1	0	0	0	0	0	0	0	0	0	0	0	1	1	1	1	1	1	1	1	2	1	1	1	1	1	1	1	1	1	1	1	1	1
16801	女	0	0	0	0	0	0	0	0	0	0	0	0	0	0	1	1	1	1	1	1	1	1	1	1	1	1	2	3	3	3	2	2	2	3	3	3	1	4	4	2	2	1	1	1	4	4	1	2
28158	男	1	0	0	0	0	0	0	0	0	0	0	0	0	0	1	0	0	0	0	0	0	0	0	0	0	0	2	1	3	1	2	2	2	2	2	1	1	1	1	1	1	1	1	1	1	1	1	1
28652	男	1	0	0	0	0	0	0	0	0	0	0	0	0	0	0	0	0	0	1	0	0	0	1	0	0	0	1	1	1	2	2	5	3	1	1	1	1	1	1	2	3	1	1	1	2	1	2	3
17092	女	1	0	0	0	0	0	0	0	0	0	1	1	0	0	0	1	0	1	0	0	0	0	0	0	0	1	2	2	2	2	2	2	2	2	3	3	3	3	3	3	4	4	3	2	3	2	2	3
29372	男	1	0	0	0	0	0	0	0	0	0	0	0	0	0	0	0	0	0	0	0	0	0	0	0	0	0	1	1	1	1	1	1	1	1	1	1	1	1	1	1	1	1	1	1	1	1	1	1
27445	女	0	0	1	0	1	0	0	0	0	0	0	0	0	0	1	0	0	1	0	1	1	0	0	0	0	1	2	2	2	2	2	2	1	2	3	1	1	3	3	1	2	3	2	1	1	2	1	3
17008	女	1	0	0	0	1	0	0	0	0	0	0	0	0	0	1	1	0	1	1	0	1	1	1	1	1	1	5	1	5	2	2	2	4	2	2	2	1	1	1	3	4	4	4	3	4	4	2	2
17317	女	0	0	0	0	0	0	0	0	0	0	0	0	0	0	1	1	1	1	1	1	1	1	1	1	0	1	1	1	2	1	1	2	1	3	2	1	1	1	1	1	1	1	1	1	1	1	1	2
25024	女	1	0	0	1	0	0	0	0	0	1	1	0	0	0	1	1	1	1	1	0	1	1	1	1	1	0	3	3	3	2	3	4	1	3	3	3	1	5	5	1	1	1	4	1	1	3	1	4
28125	男	1	0	0	0	0	0	0	0	0	0	0	0	0	0	1	0	0	1	0	1	0	0	0	0	0	0	2	2	2	2	3	2	2	2	2	2	2	2	1	2	3	2	2	2	2	2	2	2
29003	女	1	0	0	0	0	0	0	0	0	0	0	0	0	0	1	1	1	0	1	0	0	0	0	0	0	0	1	1	2	2	1	1	1	1	1	1	1	1	1	1	1	1	1	1	1	1	1	1
17150	女	1	0	0	1	0	0	0	0	0	0	1	0	1	0	1	1	0	0	1	0	0	0	1	1	1	0	3	4	4	3	2	3	2	2	3	2	1	2	2	3	4	2	4	2	3	4	3	3
17095	男	1	0	0	0	0	0	0	0	0	0	1	0	0	0	1	1	0	1	1	1	1	0	0	0	1	1	3	3	3	3	1	2	3	1	2	2	1	1	3	2	3	2	2	1	2	2	2	3
17313	男	1	0	0	0	0	0	0	0	0	0	0	0	0	0	1	1	0	1	1	1	1	1	1	1	1	1	3	3	3	4	3	3	3	3	3	3	3	3	3	3	3	3	3	3	3	3	3	3
17372	男	1	0	0	0	0	1	1	0	0	0	0	0	0	0	0	0	0	0	0	0	0	1	0	0	0	0	4	3	3	2	2	3	3	3	3	2	2	3	4	4	3	3	3	3	3	3	3	3
7017	女	1	0	0	0	0	0	0	0	0	0	1	1	0	0	1	1	1	1	0	1	1	1	1	1	1	1	2	3	2	3	3	1	1	1	3	1	1	1	4	2	4	2	2	1	1	2	1	3
16780	女	0	0	0	0	0	0	0	0	0	0	0	0	0	0	1	1	0	1	1	1	1	1	1	1	1	1	2	3	3	3	2	2	2	2	3	2	1	1	3	2	3	3	4	2	3	4	3	4
16767	女	0	0	0	0	0	0	0	0	0	0	0	0	0	0	1	1	1	0	1	1	1	1	1	1	1	1	2	2	2	2	1	2	1	4	2	1	1	5	4	2	2	3	3	1	2	1	1	4
17056	男	0	0	0	0	0	0	0	0	1	1	0	0	0	0	1	1	1	1	1	0	1	1	0	1	1	1	1	2	1	1	1	1	2	2	1	1	1	1	1	2	1	2	2	1	2	2	2	2
17153	女	1	0	0	0	0	0	0	0	0	1	0	0	0	0	1	1	1	1	0	1	1	1	1	1	1	1	3	1	4	4	1	3	1	5	5	1	1	1	5	2	3	1	1	1	1	1	1	5
29086	男	0	0	0	0	0	0	0	0	0	0	0	0	0	0	1	0	0	0	0	0	0	0	0	0	0	0	2	2	2	2	1	1	2	2	2	2	2	2	2	2	2	2	2	2	2	1	1	1
17119	男	1	0	0	0	0	0	0	0	0	0	0	0	0	0	1	1	0	1	1	1	1	1	1	1	1	1	2	1	3	1	2	1	3	1	2	2	1	1	2	1	2	1	1	1	1	1	1	3
17014	男	0	0	0	0	1	0	0	0	0	0	0	0	0	0	1	1	1	1	1	0	1	1	1	1	1	1	1	2	4	4	3	1	1	1	2	3	1	1	1	1	1	3	1	1	1	1	1	4
28523	女	0	0	0	0	1	1	0	0	0	0	0	0	0	0	1	1	1	1	1	1	1	1	0	1	1	1	2	2	1	2	1	1	1	1	2	1	1	2	1	2	2	2	3	2	1	1	1	2
29497	女	1	0	0	0	0	0	0	0	0	0	0	1	1	0	1	1	1	0	1	0	0	0	1	0	0	1	1	1	1	2	1	1	1	1	1	1	1	1	1	1	2	1	1	1	1	1	1	1
26601	女	0	0	0	0	0	0	0	0	0	0	0	0	0	0	0	0	0	0	0	0	0	0	0	0	0	0	1	1	2	2	1	1	1	1	1	1	1	1	1	1	1	1	1	1	1	1	1	1
16782	男	0	0	0	0	0	1	1	0	0	0	1	1	0	0	0	0	1	0	0	1	0	1	1	1	0	0	3	2	2	2	2	2	3	3	3	3	3	3	3	3	3	1	3	3	3	3	3	3
15426	男	0	1	0	0	0	0	1	0	0	0	1	0	0	0	1	1	0	1	1	0	1	1	0	1	1	1	2	1	1	2	3	1	1	3	1	1	2	1	1	1	1	3	1	1	2	1	1	1
25001	女	0	0	0	0	0	0	0	0	0	0	0	0	0	0	0	0	0	0	0	0	0	0	0	0	0	0	1	1	2	2	1	2	2	3	2	1	1	1	1	2	1	2	1	3	1	1	1	3
15973	女	0	0	0	0	0	0	0	0	0	0	0	0	0	0	1	0	0	1	1	1	1	1	1	1	1	1	2	3	2	2	2	2	1	2	3	2	1	1	1	2	2	2	2	1	2	1	2	2
28907	女	0	0	0	0	0	0	0	0	0	0	0	0	0	0	1	1	1	1	0	0	0	0	1	0	0	0	2	2	2	2	2	2	5	2	2	2	2	2	2	2	2	2	2	2	2	2	2	2
16976	女	0	0	0	0	0	0	0	0	0	0	0	0	0	0	1	1	1	0	1	1	1	1	1	0	0	0	1	2	1	3	1	1	1	1	1	1	1	1	1	1	1	1	1	1	1	1	1	2
28949	男	1	0	0	0	0	0	0	0	0	0	0	0	0	0	1	0	0	0	0	0	0	0	0	0	0	0	1	2	2	2	1	1	1	1	1	1	1	1	1	2	1	1	1	1	1	1	1	1
17178	女	0	1	1	0	1	0	0	0	0	0	0	0	1	0	1	0	1	1	0	1	0	0	0	0	1	0	3	3	2	2	2	2	2	2	2	2	2	2	2	2	2	3	3	3	3	4	3	3
16623	女	1	0	0	0	0	0	0	1	0	1	0	1	0	1	1	0	0	1	1	1	1	1	1	1	1	1	3	3	4	2	3	2	1	1	3	1	2	1	1	1	1	1	2	1	1	1	1	3
29131	男	0	0	0	0	0	0	0	0	0	0	0	0	0	0	1	0	0	0	0	0	0	0	0	0	0	0	2	1	2	2	2	1	1	1	2	1	1	1	1	1	1	1	1	2	1	1	1	1
16982	男	0	0	0	0	1	0	0	1	0	0	0	0	0	0	1	0	1	0	0	1	0	0	1	0	0	1	2	2	2	2	1	2	2	2	2	2	2	2	2	2	2	2	2	2	2	2	2	2
16784	女	0	0	0	0	0	0	0	0	0	0	0	0	0	0	1	1	1	1	1	1	1	1	1	1	1	0	2	3	2	2	1	1	1	2	2	2	1	1	1	2	2	3	4	2	3	3	3	4
25389	女	0	0	1	0	0	0	0	0	0	0	0	0	0	0	1	1	1	1	0	1	0	1	0	1	1	0	2	2	2	2	1	1	3	2	3	1	1	4	5	2	3	2	1	1	1	1	1	2
25373	男	1	0	0	0	0	0	0	0	0	0	0	1	0	0	0	1	1	0	0	0	0	0	0	0	0	0	2	1	2	3	1	1	1	1	1	1	1	1	2	1	1	1	2	1	1	1	1	1
16986	女	0	0	0	0	0	0	0	0	0	0	0	0	0	0	1	1	0	1	0	1	1	0	1	1	1	1	3	4	3	3	2	3	1	3	4	4	1	1	4	3	5	2	1	2	4	5	3	5
18147	男	1	0	0	0	0	0	0	0	0	0	0	0	0	0	0	0	0	1	1	1	0	0	1	0	1	0	1	1	1	1	1	1	3	1	1	1	1	1	1	1	1	1	1	1	1	1	1	3
29007	男	1	0	0	0	0	0	0	0	0	0	0	0	0	0	1	0	0	0	0	0	0	0	0	0	0	0	2	2	2	2	1	1	1	1	1	1	1	1	1	1	1	1	1	1	1	1	1	1
29243	男	0	0	0	0	0	0	0	0	0	0	0	0	0	0	1	0	1	1	0	0	1	0	1	0	0	0	3	3	3	3	1	2	1	3	3	3	3	3	3	3	3	1	1	1	3	3	1	2
27343	女	1	0	0	0	0	0	0	0	0	0	1	0	0	0	1	1	1	1	1	1	1	0	1	1	1	1	2	3	2	4	3	2	1	2	3	1	1	4	5	3	3	2	4	3	4	4	2	4
15792	男	0	0	0	0	0	0	0	0	0	0	0	0	0	0	1	0	1	0	0	0	0	0	1	1	0	0	3	3	3	3	3	3	3	3	3	3	3	3	3	3	3	3	3	3	3	3	3	3
29477	男	0	0	0	0	0	0	0	0	0	0	0	0	0	0	0	0	0	0	0	0	0	0	0	0	0	0	1	1	1	1	1	1	1	1	1	1	1	1	1	2	1	1	1	1	1	1	1	1
29235	女	0	0	0	0	0	0	0	0	0	0	0	0	0	0	1	0	0	0	0	0	0	0	1	1	0	0	2	2	3	3	2	1	2	2	3	1	1	2	2	2	2	2	2	2	3	2	2	2
16129	男	0	0	0	0	1	0	1	1	0	0	0	0	0	0	1	1	1	1	1	1	1	1	1	1	1	1	2	2	2	2	2	2	2	3	2	1	1	1	1	1	1	2	2	2	1	1	1	1
27928	女	1	0	0	0	0	0	0	0	0	0	0	0	0	0	1	0	1	1	1	1	1	0	0	0	0	1	2	1	3	3	2	1	1	1	3	3	1	1	1	1	2	1	2	3	2	2	2	2
23407	男	0	0	0	0	0	0	0	0	0	0	0	0	0	0	1	1	0	1	1	1	1	1	1	1	1	1	2	2	3	2	2	2	3	2	2	2	5	4	4	3	4	3	4	3	5	4	4	4
29048	男	0	0	0	0	1	0	0	0	0	0	0	0	0	0	1	0	1	1	1	0	1	0	0	0	0	1	3	1	2	3	3	2	3	5	2	2	1	5	5	2	3	3	1	2	2	2	2	4
28543	女	0	0	0	0	0	0	0	0	0	0	0	0	0	0	1	0	0	0	0	0	0	0	1	0	0	0	1	1	3	2	1	2	1	1	2	1	1	1	2	1	4	1	1	2	1	1	1	3
27305	男	1	0	0	0	0	0	0	0	0	0	0	0	0	0	1	0	0	0	1	0	1	0	1	0	0	0	2	1	3	2	1	1	2	1	1	1	1	1	1	1	1	1	1	1	1	1	1	1
29229	男	0	0	0	0	0	0	0	1	0	0	0	0	0	0	1	1	0	1	1	1	1	0	0	0	1	1	3	2	3	2	2	2	1	1	1	1	1	1	1	2	3	3	3	3	2	1	1	2
28980	男	1	0	0	0	0	0	0	0	0	0	0	0	0	0	1	0	1	1	1	1	0	0	1	0	1	0	2	2	3	2	1	2	2	2	2	2	2	3	3	3	3	3	3	2	3	3	3	4
15790	男	1	0	0	0	0	0	0	0	0	0	0	0	0	0	1	1	1	0	0	0	0	0	0	0	0	0	1	1	2	2	2	2	2	2	2	2	2	2	4	2	3	3	3	3	4	2	3	2
28933	男	1	0	0	0	0	0	0	0	0	0	0	0	0	1	1	0	0	0	0	0	0	0	0	0	0	0	2	3	2	1	1	1	3	1	1	1	1	1	1	1	1	1	2	1	1	1	1	1
28201	男	1	0	0	0	0	0	0	0	0	0	0	0	0	0	0	0	0	0	0	0	0	0	0	0	0	0	1	1	1	1	1	1	1	1	1	1	1	1	1	1	1	1	1	1	1	1	1	1
14641	女	0	0	1	0	1	0	0	1	0	1	0	0	0	1	1	1	1	1	0	1	1	0	1	1	1	1	4	4	5	3	2	1	1	3	2	2	1	3	5	3	5	2	2	4	5	4	2	3
23026	女	0	0	0	0	1	0	0	0	0	0	0	0	0	0	0	0	0	1	0	1	0	0	1	0	0	0	1	1	3	3	1	1	1	2	3	2	3	3	4	2	2	2	3	2	2	1	1	3
24001	男	1	0	0	0	0	0	0	0	0	0	0	0	0	0	0	0	0	1	0	0	0	0	0	0	0	0	2	2	2	2	3	1	3	2	2	1	1	1	1	2	2	2	3	2	3	1	1	2
15497	女	0	0	0	0	0	0	0	1	0	0	0	1	0	0	1	0	1	1	1	1	1	1	1	1	1	1	1	2	3	3	2	2	1	3	3	2	1	1	1	1	2	2	2	1	1	2	1	2
15194	女	0	0	0	0	0	0	0	0	0	0	0	0	0	0	1	1	1	1	1	1	1	1	1	1	1	1	1	1	2	3	4	1	1	1	1	1	1	1	1	1	2	2	2	1	1	1	1	2
23857	女	0	0	0	0	0	0	0	0	0	0	0	0	0	0	0	0	0	0	0	0	0	0	0	0	1	0	3	3	3	3	1	1	1	1	1	1	1	1	1	2	2	1	1	1	2	1	1	1
28332	女	0	0	0	0	0	0	0	0	0	0	0	0	0	0	1	0	0	0	0	0	1	0	0	0	0	0	2	2	2	1	1	1	1	2	2	1	1	1	1	1	1	1	1	1	1	1	1	2
27237	男	1	0	0	0	0	0	0	0	0	0	0	0	0	0	0	0	0	0	0	0	0	0	0	0	0	0	2	2	3	1	1	1	1	1	1	1	1	1	1	1	1	1	1	1	1	1	1	2
28003	女	0	0	0	0	0	0	0	0	0	0	0	0	0	0	0	0	0	0	0	1	1	0	1	0	0	1	2	1	2	2	2	1	1	2	1	1	1	2	1	1	1	1	1	1	1	1	1	1
15878	女	1	1	1	0	0	0	0	1	0	0	0	0	0	0	1	1	1	1	1	1	1	1	1	1	1	1	2	1	3	1	1	4	2	1	2	1	1	1	1	1	1	3	3	1	1	1	1	4
24172	男	1	0	0	0	0	0	0	0	0	0	0	0	0	0	0	0	0	1	0	0	0	0	1	0	1	0	2	1	1	2	1	1	2	1	1	1	1	1	1	1	1	1	1	1	1	1	1	1
28737	女	1	0	0	0	0	0	0	0	0	0	0	0	0	0	0	0	0	0	0	0	0	0	0	0	0	0	2	1	2	2	1	1	1	2	2	1	1	1	1	1	2	1	1	2	1	1	1	1
25861	女	0	0	0	0	0	0	0	0	0	0	0	0	0	0	1	0	0	1	0	0	0	0	1	0	0	0	3	1	3	3	3	1	1	1	2	1	1	1	1	1	2	1	1	3	3	4	3	4
28050	女	0	0	0	0	0	0	0	1	0	0	1	0	0	0	1	0	1	1	0	1	1	1	1	1	0	0	4	3	3	3	2	1	3	3	2	2	1	1	1	2	2	2	1	2	2	1	1	1
27751	女	1	0	0	0	0	0	0	0	0	0	0	0	0	0	1	0	1	0	0	0	0	0	0	0	0	0	1	1	1	2	1	1	1	1	2	1	1	1	1	1	1	1	1	1	1	1	1	1
28351	女	0	0	0	0	0	0	0	0	0	0	0	0	0	0	0	0	0	0	0	0	1	0	0	0	1	0	2	1	2	2	2	1	1	2	2	1	1	1	1	2	2	1	2	2	2	1	1	2
15994	女	1	0	0	0	0	0	0	0	0	0	0	0	0	0	1	1	1	1	1	1	1	1	1	1	1	1	4	4	3	4	3	2	5	3	4	2	3	4	5	2	3	3	3	2	3	3	3	4
27266	女	1	0	0	0	0	0	0	0	0	0	0	0	0	0	1	0	0	0	0	0	0	0	0	0	1	1	2	2	2	2	1	1	1	2	2	1	1	1	1	1	2	1	1	1	1	1	1	2
15952	男	0	0	0	1	1	0	0	1	0	1	0	0	0	0	1	1	1	1	1	1	1	1	1	1	1	1	2	2	2	2	3	3	4	2	2	1	1	1	1	2	3	2	3	1	1	1	3	2
27922	男	0	0	0	0	0	0	0	0	0	0	0	0	0	0	0	0	0	0	0	0	0	0	1	0	0	0	2	2	2	2	1	1	1	1	1	1	1	2	2	2	2	2	2	2	3	1	1	2
15894	男	1	0	0	0	0	0	0	0	0	0	0	0	0	0	1	1	1	1	1	1	1	1	1	1	1	1	1	1	2	1	2	5	1	1	1	1	1	1	1	1	1	1	1	1	1	1	1	2
28414	女	0	0	0	0	0	0	0	0	0	0	0	0	0	0	0	0	0	1	0	0	0	0	1	0	0	0	2	1	2	1	1	1	1	1	2	1	1	1	1	3	2	1	2	2	2	1	1	2
14475	女	0	0	0	0	0	0	0	0	0	0	1	1	0	0	1	1	0	0	0	1	1	1	1	1	0	1	2	2	4	2	2	2	1	1	1	1	1	1	1	1	2	1	2	1	1	1	1	1
23315	女	0	0	0	0	1	0	0	0	0	0	0	0	0	0	0	0	0	0	0	0	0	0	0	0	0	0	1	1	3	1	1	1	1	1	1	1	1	1	1	1	1	3	1	1	1	1	1	1
28086	男	1	0	0	0	0	0	0	0	0	0	0	0	0	0	1	0	1	0	1	0	0	0	1	0	0	0	1	1	2	2	1	1	1	1	3	1	1	4	5	2	1	1	1	1	1	1	1	3
23310	男	1	0	0	0	0	0	0	0	1	0	0	0	0	0	0	0	0	0	0	0	0	0	0	0	0	0	1	2	2	1	1	1	1	1	1	1	1	1	2	1	1	1	1	1	1	1	1	1
28703	女	0	0	0	0	0	0	0	0	0	0	0	0	0	0	1	0	0	1	0	0	0	0	1	0	0	0	2	1	3	3	1	1	1	1	2	1	1	1	1	1	1	1	2	1	1	1	1	2
15663	女	0	0	0	0	1	0	0	1	0	0	1	0	0	0	1	1	1	1	1	1	1	1	1	1	1	1	4	4	4	2	2	3	1	2	4	2	1	3	2	1	3	4	2	2	1	1	1	4
24943	女	0	0	0	0	0	0	0	0	0	0	0	0	0	0	1	0	1	0	0	0	0	0	0	0	0	0	1	1	2	3	1	1	1	2	2	1	1	1	3	2	2	1	2	2	2	1	1	3
25995	女	1	0	0	0	0	0	0	0	0	0	0	0	0	0	1	0	0	1	0	1	1	0	1	1	1	0	2	2	2	2	1	1	1	1	2	2	1	1	1	1	1	1	1	1	1	1	1	1
24032	女	0	0	0	0	0	0	0	0	0	0	0	0	0	0	1	1	1	1	1	1	1	0	1	0	0	0	2	2	2	2	2	2	1	1	2	2	2	2	2	2	3	2	2	2	2	2	2	2
24934	女	0	0	0	0	0	0	0	0	0	0	0	0	0	0	0	0	0	0	0	0	0	0	0	0	0	0	1	1	1	1	1	1	1	1	1	1	1	1	1	1	1	1	1	1	1	1	1	1
28799	女	0	0	0	0	0	0	0	0	0	0	0	0	0	0	0	0	0	0	0	0	0	0	0	0	0	0	1	1	2	1	1	1	1	1	1	1	1	1	1	2	1	1	1	1	1	1	1	1
28044	女	0	0	0	0	0	0	0	0	0	0	0	0	0	0	1	0	1	0	1	1	0	0	1	1	1	1	2	1	2	2	1	1	1	1	2	1	1	1	1	1	2	2	1	1	1	1	1	3
27549	女	0	0	0	0	0	0	0	0	0	0	0	0	0	0	0	0	0	0	0	0	0	0	0	0	0	0	1	1	1	1	1	1	1	1	1	1	1	1	1	1	1	1	1	1	1	1	1	1
28766	女	0	0	0	0	1	0	0	0	0	0	0	0	0	0	1	0	0	0	0	0	0	0	1	0	0	0	2	1	3	1	1	1	3	3	2	1	1	3	4	1	1	4	1	2	4	1	1	5
25263	女	0	0	0	0	0	0	0	0	0	0	0	0	0	0	1	1	1	1	1	1	1	1	1	0	0	0	2	2	2	2	1	1	1	1	2	1	1	1	1	1	1	3	1	1	1	1	1	2
26553	女	1	1	0	0	0	0	0	0	0	0	0	0	0	0	1	0	1	1	1	0	1	1	1	0	0	0	1	1	3	1	4	1	2	2	2	1	1	1	1	2	2	1	1	1	1	1	1	2
26411	女	1	0	0	0	0	0	0	0	0	0	0	0	0	0	0	0	0	0	0	0	0	0	0	0	0	0	2	2	3	2	2	1	1	2	1	1	1	1	1	1	1	1	1	1	1	1	1	2
10167	女	0	0	0	0	0	0	0	0	0	0	0	0	0	0	1	1	1	1	1	1	1	1	1	1	1	1	3	2	3	3	3	3	3	3	3	1	1	1	1	1	2	2	2	2	1	1	1	3
5364	女	0	0	0	0	1	0	0	0	0	0	0	0	0	1	1	1	1	1	1	0	1	0	1	1	0	1	1	1	4	3	2	3	2	3	2	3	3	3	3	2	3	3	3	1	2	2	2	1
26915	女	0	0	0	0	0	0	0	0	0	0	0	0	0	0	0	0	0	0	0	0	0	0	0	0	1	0	2	1	3	1	1	2	2	2	3	1	1	1	2	2	1	3	1	2	1	1	1	3
26266	女	1	0	0	0	0	0	0	0	0	0	0	0	0	0	0	0	0	0	0	0	0	0	1	0	0	0	3	2	3	2	1	2	1	1	2	1	1	1	1	1	3	1	1	1	2	2	1	2
25933	女	0	0	0	0	0	0	0	0	0	0	0	0	0	0	1	0	0	1	1	0	0	0	0	0	0	0	2	1	2	2	2	3	1	2	1	1	1	2	3	1	2	2	2	1	1	1	1	1
26790	女	1	0	0	0	0	0	0	0	0	0	0	0	0	0	1	0	0	0	0	0	0	0	0	0	0	0	2	1	2	2	1	1	1	1	1	1	1	1	1	1	1	1	2	2	1	1	1	1
26840	女	0	0	0	0	0	0	0	0	0	0	0	0	0	0	0	0	0	0	0	0	0	0	0	0	0	0	1	1	1	1	1	1	1	1	1	1	1	1	1	1	1	1	1	1	1	1	1	1
27156	女	1	1	0	0	1	0	0	0	0	0	0	0	0	0	0	0	0	1	0	0	0	0	1	0	0	1	3	2	4	3	2	1	1	3	2	1	1	3	3	3	2	2	3	3	4	3	3	4
26780	女	0	0	0	0	0	0	0	0	0	0	0	0	0	0	0	0	0	1	0	0	0	0	1	0	1	0	1	1	1	1	1	2	3	1	1	1	1	1	1	1	1	1	1	1	1	1	1	1
15714	女	0	0	0	0	0	0	0	1	0	0	0	0	0	0	1	1	1	1	1	1	1	1	1	1	0	0	4	4	4	4	2	3	1	3	4	4	1	1	1	4	4	1	4	4	4	1	1	4
26871	女	0	0	0	0	0	0	0	0	0	0	0	0	0	0	0	1	1	1	0	0	1	0	0	0	0	0	1	2	2	2	1	1	1	1	1	1	1	1	1	1	1	1	1	1	1	1	1	1
26214	女	0	0	0	0	0	0	0	0	0	0	0	0	0	0	1	0	0	1	0	1	0	1	1	0	0	0	2	3	4	2	1	2	1	1	2	1	1	1	1	2	3	2	3	2	1	1	1	1
26528	女	0	0	0	0	1	0	0	0	0	0	0	0	0	0	0	0	0	0	0	0	0	0	0	0	0	0	1	1	1	1	1	1	1	1	1	1	1	1	1	1	1	1	1	1	1	1	1	1
27342	女	0	0	0	0	0	0	0	0	0	0	0	0	0	0	1	1	1	0	0	0	0	0	0	1	1	1	2	3	3	3	2	2	2	1	2	2	2	4	4	2	3	3	3	2	2	3	2	2
27059	女	0	0	0	0	0	0	0	0	0	0	0	0	0	0	1	0	0	1	0	1	0	0	1	0	0	0	2	3	3	3	1	2	1	2	2	3	1	1	1	2	2	2	1	1	3	1	1	3
5743	女	0	0	0	0	1	0	0	0	0	0	0	0	0	1	1	1	0	1	1	1	1	0	1	0	0	0	2	3	2	2	2	2	1	2	2	5	1	1	2	3	3	2	1	2	2	1	1	1
26298	女	0	0	0	0	1	0	0	0	0	0	0	0	0	0	0	0	0	0	0	0	0	0	0	0	0	0	1	1	1	1	1	1	1	1	1	1	1	1	1	1	1	2	1	1	1	1	1	2
26818	女	1	0	0	0	0	0	0	0	0	0	0	0	0	0	0	0	0	0	0	0	0	0	0	0	0	0	2	1	2	1	1	1	1	1	1	1	1	1	1	1	1	1	1	1	1	1	1	2
26678	女	0	0	0	0	0	0	0	0	0	0	0	0	0	0	0	0	0	0	0	0	0	0	1	0	0	0	2	2	3	2	2	1	1	1	2	2	2	4	4	3	2	3	1	3	3	1	1	3
26930	女	0	0	0	0	0	0	0	0	0	0	0	0	0	0	0	0	1	0	0	1	1	0	1	0	0	0	1	1	2	1	1	2	1	1	3	1	1	1	2	1	1	2	1	1	2	2	2	2
26444	女	0	0	0	0	0	0	0	0	0	0	0	0	0	0	0	0	0	1	1	1	0	1	1	0	0	0	1	1	3	2	1	1	2	2	3	1	1	2	2	3	3	2	3	1	1	1	1	3
26633	女	0	0	0	0	0	0	0	0	0	0	0	0	0	0	0	0	0	1	0	0	0	0	0	0	1	0	2	2	2	2	2	1	1	2	2	1	2	1	1	2	2	2	2	1	2	2	2	2
26962	女	0	0	0	0	0	0	0	0	0	0	0	0	0	0	1	0	1	1	0	1	0	0	1	0	0	0	2	2	2	2	1	1	1	1	2	1	1	1	1	2	2	3	1	2	2	1	1	2
23529	女	0	0	0	0	0	0	0	0	0	0	0	0	0	0	0	0	0	0	0	0	0	0	0	0	0	0	1	1	2	1	1	1	1	1	2	1	1	1	1	1	1	2	1	1	1	1	1	1
26692	女	1	1	1	0	0	0	0	0	0	0	0	0	0	0	0	0	0	0	0	0	0	0	0	0	0	0	3	4	3	3	2	2	1	2	2	2	1	1	5	2	2	3	2	1	2	1	1	2
26736	女	0	0	1	0	1	0	0	0	0	0	0	0	0	0	1	0	0	0	1	1	0	0	0	0	0	1	2	2	2	2	1	2	1	1	2	1	1	2	2	1	2	1	1	1	2	1	1	2
26648	女	1	0	0	0	0	1	0	0	0	0	0	0	0	0	1	1	0	1	0	1	0	1	1	1	1	0	2	2	2	2	1	1	1	2	2	1	1	2	1	1	1	2	2	1	1	1	1	1
26619	女	0	0	0	0	1	0	0	0	0	0	0	0	0	0	0	0	1	0	0	0	0	0	0	0	0	0	1	1	1	1	1	2	1	1	1	1	1	1	1	1	1	4	1	1	1	1	1	1
27035	女	0	0	0	0	0	0	0	0	0	0	0	0	0	0	1	0	0	0	0	0	0	0	1	0	1	0	2	2	3	3	1	2	1	1	1	1	1	1	1	2	3	2	2	1	2	1	1	2
26018	女	0	0	0	0	0	0	0	0	0	0	0	0	0	0	0	0	0	1	0	0	0	0	1	0	0	0	2	2	2	1	1	1	1	1	2	1	1	1	1	1	1	1	1	1	2	2	1	2
26281	女	0	0	0	0	1	0	0	0	0	0	0	0	0	0	1	0	1	1	0	0	1	0	0	0	0	0	2	1	4	2	1	1	1	2	3	4	1	2	2	2	3	2	2	1	3	1	1	2
26392	女	1	0	0	0	0	0	0	0	0	0	0	0	0	0	0	0	0	0	0	0	0	0	0	0	0	0	2	2	2	2	2	2	2	2	2	1	1	1	1	1	2	1	1	1	1	1	1	2
26983	女	0	0	0	0	0	0	0	0	0	0	0	0	0	0	0	0	0	1	0	0	0	0	1	0	0	0	2	2	2	2	2	2	3	2	2	2	1	1	1	2	2	3	2	2	2	2	2	2
26006	女	0	1	1	1	0	0	0	0	0	0	0	0	0	0	1	0	0	0	0	0	0	0	0	0	0	0	2	2	2	2	1	1	1	1	1	1	1	1	1	2	2	1	2	2	2	1	1	1
26723	女	1	0	1	0	1	0	0	1	0	0	0	0	0	0	1	1	1	1	1	0	1	1	1	1	1	1	3	2	4	4	2	3	1	3	5	3	1	1	5	1	3	3	3	3	4	3	3	4
3381	男	1	1	1	0	0	0	0	0	0	0	0	0	0	0	1	1	0	1	1	0	1	0	0	1	1	1	2	3	3	2	2	2	2	2	2	2	2	2	3	2	2	3	2	2	2	2	2	2
25411	男	1	1	1	0	0	0	0	0	0	0	0	0	0	0	0	0	0	0	0	0	0	0	0	0	0	0	1	2	1	2	1	2	2	2	2	2	2	2	4	1	2	1	2	1	2	1	1	2
25542	男	1	0	0	0	0	0	0	0	0	0	0	0	0	0	1	1	0	0	1	1	0	0	1	0	0	0	2	3	3	4	3	1	4	3	2	1	1	1	2	2	3	3	1	3	3	4	2	3
25648	男	0	0	0	0	0	0	0	0	0	0	0	0	0	0	1	0	0	0	0	0	0	0	0	0	0	0	1	1	2	2	1	1	2	1	2	1	1	1	1	2	2	1	1	1	1	1	1	2
26779	男	0	0	0	0	0	0	0	0	0	0	0	0	0	0	0	0	0	0	0	0	1	1	0	0	0	0	2	2	3	1	2	2	1	1	2	1	1	1	1	2	1	1	1	2	1	1	1	2
14338	男	0	0	0	0	1	0	0	1	0	0	0	0	0	0	1	1	1	1	0	1	0	1	0	0	0	0	2	2	2	2	2	1	2	1	2	2	1	1	1	1	2	1	1	2	2	2	3	3
25916	男	1	0	0	0	1	0	0	0	0	0	0	0	0	0	1	1	0	0	0	0	0	0	1	1	0	1	1	1	1	1	1	1	1	1	1	1	1	1	1	1	1	2	1	1	1	1	1	1
26534	男	0	0	0	0	1	0	0	0	0	0	0	0	0	0	0	0	0	0	0	0	0	0	0	0	0	0	5	1	1	2	2	1	1	2	1	1	1	1	1	3	3	2	1	1	1	1	2	1
26123	男	1	0	0	0	0	0	0	0	0	0	0	0	0	0	1	1	1	1	1	0	1	0	1	1	1	1	2	2	2	2	2	1	2	2	2	2	1	3	1	2	3	3	2	2	2	2	2	3
27098	男	0	0	0	0	0	0	0	0	0	0	1	1	0	0	0	0	0	0	0	0	1	0	0	0	0	0	2	2	2	2	1	2	2	3	3	3	1	1	1	2	2	2	2	1	2	2	2	3
26812	男	1	0	0	0	0	0	0	0	0	0	0	0	0	0	0	0	0	0	0	0	0	0	0	0	0	0	1	1	2	1	1	1	1	2	2	1	1	1	1	1	1	1	1	1	1	1	1	2
8950	女	0	0	0	0	0	0	0	0	0	0	0	0	0	0	1	1	1	0	0	1	1	0	1	0	0	0	2	3	3	3	3	2	1	3	3	2	1	1	2	2	4	3	2	2	4	1	2	4
25780	女	0	0	0	0	0	0	0	0	0	0	0	0	0	0	1	1	1	1	1	1	1	0	1	1	1	1	3	2	2	3	1	1	2	1	2	1	1	1	1	1	2	1	1	1	1	1	1	1
25698	女	0	0	0	0	0	0	0	0	0	0	0	0	0	0	1	1	0	1	1	0	1	0	0	0	1	0	3	2	1	2	3	2	3	2	1	2	1	1	1	1	1	1	1	1	1	1	1	1
26190	女	0	0	0	0	0	0	0	0	0	0	0	0	0	0	0	0	0	0	0	0	0	0	0	0	0	0	1	1	2	1	1	1	1	2	2	2	1	1	1	1	1	1	1	1	1	1	1	1
26247	女	0	0	0	0	0	0	0	0	0	0	1	0	0	0	1	0	1	1	1	1	0	0	1	0	0	0	2	1	3	1	2	1	1	1	1	1	1	1	1	1	1	1	1	2	1	1	1	1
5360	女	1	0	0	0	0	0	0	1	0	0	0	0	0	0	1	1	0	1	1	1	1	0	1	1	1	1	3	4	3	3	2	5	1	2	4	1	1	1	1	3	4	1	3	1	1	1	1	3
26142	女	0	0	0	0	0	0	0	0	0	0	0	0	0	0	1	1	0	1	0	1	1	0	1	0	0	0	2	1	3	3	2	2	3	2	2	1	1	2	2	1	3	1	1	1	1	1	1	3
26856	女	0	0	0	0	0	0	0	0	0	0	0	0	0	0	1	1	0	1	0	1	1	0	1	1	0	0	3	1	3	2	2	2	1	2	2	1	1	2	3	3	3	3	3	2	2	3	2	3
14785	女	1	0	0	0	0	0	0	0	0	1	0	0	0	1	1	1	1	1	1	1	1	1	1	1	1	0	2	2	1	2	2	2	2	2	2	2	1	1	1	1	1	1	1	2	1	1	1	3
27190	女	0	0	0	0	1	0	0	0	0	0	0	0	0	0	1	0	0	1	0	0	0	0	0	0	0	0	1	1	2	1	1	1	1	1	1	1	1	1	1	1	1	2	1	1	1	1	1	1
26521	女	0	0	0	0	0	0	0	0	0	0	0	0	0	0	1	0	0	0	0	0	0	0	1	1	0	0	2	2	3	2	2	1	1	3	3	1	1	1	4	1	1	3	1	3	1	1	1	1
25878	女	1	0	0	0	0	0	0	0	0	0	0	0	0	0	1	1	1	1	1	1	1	1	1	1	1	1	2	1	2	1	1	2	1	1	2	1	1	1	1	1	2	1	1	1	1	1	1	3
26135	女	1	0	0	0	0	0	0	0	0	0	0	0	0	0	1	0	0	0	0	0	1	0	0	0	0	0	2	2	2	2	2	3	1	1	3	1	1	2	2	1	2	1	2	2	1	1	1	3
26157	女	1	0	0	0	0	0	0	0	0	0	0	0	0	0	1	1	1	1	1	0	0	0	1	1	0	0	2	2	2	2	2	2	2	1	2	2	1	3	3	2	2	1	2	3	2	1	1	2
4497	女	1	0	0	0	0	0	0	0	0	0	1	0	0	0	1	0	0	0	0	0	0	0	1	1	1	1	3	3	3	3	3	2	3	3	4	3	1	1	1	1	3	2	3	3	1	1	1	4
14756	女	0	0	0	0	1	0	0	1	0	0	0	1	0	0	1	1	1	1	1	1	1	1	1	1	1	1	3	3	3	3	2	1	4	3	3	3	1	1	1	1	1	1	1	2	1	1	1	4
26884	女	1	0	0	0	0	0	0	0	0	0	0	0	0	0	0	0	1	1	0	0	0	0	0	0	0	0	2	1	2	1	1	1	1	1	2	1	1	1	1	1	1	1	1	1	1	1	1	1
26929	女	0	0	0	0	0	0	0	0	0	0	0	0	0	0	1	0	0	1	0	0	0	1	1	0	1	0	2	1	3	2	1	2	3	3	3	3	1	1	1	2	2	3	3	2	3	3	3	3
26889	女	0	0	0	0	0	0	0	0	0	0	0	0	1	0	1	1	0	0	0	1	1	0	1	1	0	0	2	3	2	2	1	2	1	1	1	1	1	2	2	1	3	2	1	1	1	1	1	1
26858	女	0	0	1	0	1	0	0	0	0	0	0	0	0	0	0	0	0	0	0	0	0	0	0	0	0	0	2	2	2	2	2	1	1	2	2	1	1	1	3	1	1	1	1	1	1	1	1	1
25530	女	0	0	0	0	1	0	0	0	0	0	0	0	0	0	0	0	0	1	0	0	0	0	0	0	0	0	1	1	1	1	1	1	1	1	1	1	1	1	1	1	1	2	1	2	3	1	1	2
26934	女	0	0	0	0	1	0	0	0	0	0	0	0	0	0	1	1	0	0	1	0	0	0	0	0	1	0	2	1	2	1	2	1	3	1	3	1	1	1	1	1	1	3	3	1	1	1	1	3
26872	女	0	0	0	0	0	0	0	0	0	0	0	0	0	0	1	1	1	1	1	1	0	0	0	0	0	0	2	2	3	3	2	2	5	4	4	2	1	1	1	2	2	3	2	1	1	1	1	3
25936	女	0	0	0	0	1	0	0	0	0	0	0	0	0	0	0	0	1	0	0	0	0	0	0	0	0	0	1	1	2	2	1	1	1	1	1	1	1	1	1	1	1	2	1	2	1	1	1	1
25792	女	0	0	0	0	0	0	0	0	0	0	0	0	0	0	1	0	0	0	0	0	0	0	0	0	0	0	1	2	2	2	1	1	1	1	1	1	1	1	1	1	1	1	1	1	1	1	1	1
27200	女	0	0	0	0	0	0	0	0	0	0	0	0	0	0	0	0	0	0	0	0	0	0	0	0	0	0	1	2	2	2	2	1	1	1	2	1	1	1	1	1	1	1	1	1	1	1	1	1
26613	女	0	0	0	0	0	0	0	0	0	0	0	0	0	0	1	0	1	0	0	0	0	0	0	0	0	1	1	1	2	1	1	1	1	2	2	1	1	1	1	1	1	1	1	1	2	1	1	2
25413	女	0	1	1	1	1	0	0	0	0	0	0	0	0	0	1	1	0	1	1	1	1	0	1	1	0	1	2	2	3	2	2	3	2	2	3	3	1	1	4	2	3	3	2	2	3	2	2	3
10124	女	0	0	0	0	0	0	0	0	0	0	0	0	0	0	1	1	1	1	1	1	1	1	0	1	0	0	4	4	4	3	3	1	1	3	3	2	1	1	1	3	4	3	3	2	4	1	1	4
25544	女	0	0	0	0	1	0	0	0	0	0	0	0	0	0	1	0	0	0	1	0	0	0	1	0	0	0	3	3	2	2	2	2	2	2	2	2	2	2	2	2	3	3	3	2	3	3	3	2
26048	女	0	0	0	0	0	0	0	0	0	0	0	0	0	0	1	1	0	0	0	0	0	0	1	1	0	1	1	2	1	2	2	1	1	2	1	1	1	1	2	1	2	2	2	1	2	1	1	1
27187	女	0	0	0	0	0	0	0	0	0	0	0	0	0	0	1	1	1	1	1	1	1	1	1	1	1	0	3	4	2	3	2	3	2	2	2	1	1	3	4	2	2	3	3	1	1	1	1	3
26072	女	1	0	0	0	0	0	0	0	0	0	0	0	0	0	1	0	1	0	0	0	0	0	0	0	0	1	2	2	3	2	1	1	1	2	2	2	1	1	2	2	2	2	3	2	4	2	2	3
26792	女	0	0	0	0	1	0	0	0	0	0	0	0	0	0	1	1	1	1	1	1	0	0	1	0	0	0	3	3	3	3	4	2	4	2	3	3	1	4	5	4	2	4	4	4	4	4	4	3
26366	女	0	0	0	0	0	0	0	0	0	0	0	0	0	0	1	0	0	0	0	0	1	0	0	0	0	0	3	1	3	2	1	1	1	3	3	1	1	1	1	2	2	1	1	1	2	3	2	3
26591	女	0	0	0	0	0	0	0	0	0	0	0	0	0	0	0	0	0	1	0	0	0	0	1	0	0	0	2	1	2	3	1	1	2	1	1	1	1	1	1	3	3	1	2	3	4	3	3	2
25436	女	1	0	0	0	1	0	0	0	0	0	0	0	0	0	1	0	1	0	0	0	0	0	0	0	0	0	1	1	2	2	1	1	1	2	2	1	1	1	1	1	2	2	2	2	2	2	1	1
26702	男	1	0	0	0	0	0	0	0	0	0	0	0	0	0	0	0	0	0	0	0	0	0	0	0	0	0	1	2	3	3	3	2	2	2	3	3	3	3	3	3	3	3	3	3	3	3	3	3
26682	男	0	1	0	0	0	0	0	0	0	0	0	0	0	0	1	0	0	1	0	0	0	0	0	0	0	0	1	1	2	1	2	1	2	1	1	1	1	1	1	1	1	1	1	3	1	1	1	2
27196	男	1	0	0	0	1	0	0	0	0	0	1	0	0	0	1	0	1	1	1	1	1	1	1	1	1	1	2	2	2	2	2	1	1	1	1	1	1	1	1	1	3	3	1	1	1	1	1	1
26410	男	1	0	0	0	0	0	0	0	0	0	0	0	0	0	0	0	0	0	0	0	0	0	0	0	0	0	2	1	2	1	1	1	1	1	2	1	1	1	1	1	1	1	1	1	1	1	1	2
14754	男	0	0	0	0	0	0	0	0	0	0	0	1	0	0	1	1	0	0	1	0	0	0	1	0	0	1	3	2	2	2	2	3	2	3	2	2	2	3	3	3	3	3	3	3	2	2	2	2
25760	男	0	0	0	0	0	0	0	0	0	0	0	0	0	0	1	0	0	0	0	0	0	0	0	0	0	0	2	2	2	2	2	2	2	2	2	2	2	2	2	2	2	2	2	2	1	2	1	2
14099	男	1	0	0	0	0	0	0	0	0	0	0	0	0	0	1	1	1	1	1	1	1	1	1	1	1	1	2	1	1	1	1	1	1	1	1	1	1	1	1	1	1	1	1	1	1	1	1	1
25453	男	1	0	0	0	0	0	0	0	0	0	0	0	0	0	1	1	0	0	1	0	0	0	0	1	1	0	2	1	3	2	2	1	1	2	3	3	1	1	4	2	2	2	2	2	2	3	1	3
26833	男	1	0	0	0	0	0	0	0	0	0	0	0	0	0	0	0	0	0	0	0	0	0	0	0	0	0	1	1	1	1	1	1	1	1	1	1	1	1	1	1	1	1	1	2	1	1	1	1
25684	女	0	0	0	0	0	0	0	0	0	0	0	0	0	0	1	0	0	0	0	0	0	0	1	0	0	0	2	2	2	3	2	2	1	1	4	2	1	1	3	2	3	1	1	1	3	4	3	3
27110	女	0	0	0	0	0	0	0	0	0	0	0	0	0	0	1	1	1	1	1	0	0	0	0	1	0	0	2	1	2	3	1	2	1	3	2	1	1	1	1	1	2	2	1	2	1	1	1	2
26866	女	0	0	1	0	0	0	0	0	0	0	0	0	0	0	1	1	0	1	1	1	1	1	1	0	1	0	2	2	2	1	1	1	1	1	2	1	1	1	3	1	1	3	2	1	1	1	1	2
27128	女	0	0	0	0	0	0	0	0	0	0	0	0	0	0	1	0	0	0	0	1	1	0	1	0	1	0	2	1	2	1	1	1	1	1	1	1	1	1	1	1	1	1	1	2	1	1	1	2
27060	女	1	0	0	0	0	0	0	0	0	1	0	0	0	0	1	1	1	1	1	1	1	1	1	1	0	0	3	3	4	2	1	3	1	3	4	3	1	1	2	2	3	2	1	1	1	1	1	1
26925	女	1	0	0	0	0	0	0	0	0	0	0	0	0	0	1	0	0	1	0	0	1	1	1	0	1	0	3	2	2	2	2	2	1	1	2	2	1	1	2	2	2	2	2	3	4	3	3	3
5088	女	1	0	0	0	0	0	0	0	0	0	1	0	1	1	1	1	1	0	1	1	1	0	1	0	0	0	3	1	2	2	3	4	1	2	2	1	1	1	1	1	2	1	2	1	1	1	1	2
26148	女	1	0	0	0	0	0	0	0	0	0	0	0	0	0	0	0	1	1	0	0	0	1	1	1	1	1	3	3	2	4	2	2	2	3	4	2	1	1	1	1	3	2	2	2	1	1	1	1
9461	女	0	0	0	1	1	0	0	0	0	1	0	0	0	0	1	1	1	1	1	1	1	1	1	1	1	1	3	3	3	2	3	3	4	3	3	2	1	1	1	1	3	3	3	3	3	3	3	3
25438	女	1	0	0	0	1	0	0	0	0	0	0	0	0	0	1	0	0	0	0	0	0	0	1	0	0	0	2	2	2	2	1	1	1	1	1	1	1	1	1	1	1	2	2	2	1	1	1	3
26677	女	1	0	0	0	0	0	0	0	0	0	0	0	0	0	1	0	1	1	1	0	0	0	1	1	1	0	3	1	3	3	1	1	1	1	2	1	1	1	1	2	3	1	1	1	1	1	1	2
27076	女	1	0	0	0	0	0	0	0	0	0	0	0	0	0	1	0	0	1	1	0	0	0	1	0	1	0	2	2	2	2	2	1	2	2	2	2	1	2	2	2	2	2	3	1	1	1	1	2
27090	女	0	0	0	0	0	0	0	0	0	0	0	0	0	0	1	0	0	1	0	1	0	0	1	0	1	0	2	2	2	3	2	2	2	2	2	2	1	2	2	2	3	2	2	2	3	3	2	3
27166	女	0	0	0	0	0	0	0	0	0	0	0	0	0	0	0	0	0	0	0	0	0	0	0	0	0	0	1	2	1	2	1	2	2	1	2	1	1	1	1	2	2	2	1	2	1	1	1	2
26860	女	0	0	0	0	0	0	0	0	0	0	0	0	0	0	1	0	0	0	0	1	0	0	0	0	0	0	2	1	2	2	2	1	1	1	2	1	1	1	1	1	1	1	1	1	1	1	1	2
26895	女	1	1	1	0	0	0	0	0	0	0	0	0	0	0	1	1	0	1	1	1	1	0	1	1	1	0	2	2	3	3	3	3	1	1	3	3	1	1	5	2	1	2	2	1	1	1	1	3
25842	女	0	0	0	0	1	0	0	0	0	0	0	0	0	0	0	0	1	0	0	0	0	0	0	0	0	0	1	2	1	2	1	1	1	1	1	1	1	1	2	1	2	1	1	1	2	2	1	2
26657	女	0	0	0	0	0	0	0	0	0	0	0	0	0	0	1	0	0	1	0	1	0	0	1	0	0	0	3	2	3	2	1	2	2	3	3	3	1	3	3	2	3	2	4	2	3	4	3	2
15147	女	0	0	0	0	0	0	0	0	0	0	0	0	0	0	1	1	1	1	1	1	1	1	1	1	1	1	2	2	2	2	3	3	3	2	4	2	2	2	2	2	2	3	2	2	2	2	2	2
5348	女	1	0	0	0	0	0	0	0	0	0	0	0	0	0	1	1	0	1	1	1	1	0	1	1	1	1	3	1	1	1	1	1	1	1	1	1	1	1	1	1	5	1	1	1	1	1	1	3
4802	女	0	1	0	0	0	0	0	1	0	0	0	0	0	0	1	1	1	1	1	1	1	0	1	1	1	1	3	3	2	2	2	2	3	2	5	2	2	3	5	2	2	2	3	3	3	2	2	4
26991	女	0	0	0	0	0	0	0	0	0	0	0	0	0	0	1	1	1	0	1	1	0	0	0	1	1	1	2	2	2	2	2	2	1	1	2	2	1	1	1	3	3	2	1	2	2	2	3	3
26817	女	1	0	0	0	0	0	0	0	0	0	0	0	0	0	1	1	0	1	0	1	0	0	1	0	0	0	2	1	3	2	1	1	1	2	1	1	1	1	1	2	2	1	1	2	1	2	1	2
26447	女	0	0	0	0	0	0	0	0	0	0	0	0	0	0	1	1	0	0	1	1	1	1	1	1	1	1	2	2	3	3	2	2	2	2	3	2	1	1	1	1	3	2	2	2	1	1	1	3
26777	女	0	0	0	0	0	0	0	0	0	0	0	0	0	0	1	1	0	0	0	0	1	0	0	0	0	0	2	1	3	2	1	2	1	2	2	1	1	3	3	2	2	2	1	2	1	1	1	1
26810	女	0	0	0	0	1	0	0	0	0	0	0	0	0	0	0	0	1	0	0	0	0	0	0	0	0	0	1	1	1	1	1	1	1	2	1	1	1	1	1	1	1	2	1	1	1	1	1	1
26435	女	0	0	0	0	0	0	0	0	0	0	0	0	0	0	1	1	1	1	0	0	0	0	1	0	0	1	2	1	3	2	2	1	1	1	2	1	1	1	1	1	1	1	1	1	2	1	1	3
6984	女	0	0	0	0	1	0	0	0	0	1	0	0	0	0	1	1	1	1	1	0	1	1	0	1	1	1	2	3	4	3	3	3	4	3	4	1	1	3	5	3	3	3	3	2	3	4	3	4
27074	女	0	0	0	0	0	1	0	0	0	0	0	0	0	0	1	0	1	0	0	0	0	0	0	0	1	0	1	1	2	1	2	1	1	1	3	1	1	3	4	1	2	3	1	1	1	1	1	1
27056	女	0	0	0	0	1	0	0	0	0	0	0	0	0	0	0	0	0	0	1	0	0	0	0	0	0	0	2	2	4	2	1	1	1	1	1	1	1	1	4	3	1	3	3	2	2	4	2	3
26362	女	0	0	0	0	0	0	0	0	0	0	0	0	0	0	1	0	1	1	0	1	1	0	0	0	0	0	3	2	2	3	1	2	2	2	2	3	3	4	5	2	2	2	3	2	3	2	2	3
5093	女	0	0	0	0	0	0	0	0	0	0	0	0	0	0	1	0	1	1	1	0	1	1	1	1	0	0	3	3	4	3	2	2	2	3	3	1	1	1	1	1	3	1	1	1	3	1	1	4
5109	男	1	0	0	0	0	0	0	1	0	0	1	1	0	1	0	0	0	1	0	1	1	1	1	0	1	1	2	3	2	1	2	1	3	2	3	1	2	1	1	2	2	1	1	2	1	3	2	2
26995	男	0	0	0	0	0	0	0	0	0	0	0	0	0	0	1	0	1	1	0	1	1	1	0	1	0	0	2	2	2	1	1	1	1	2	2	1	1	1	1	1	1	1	1	2	2	1	1	2
26071	男	0	0	0	0	0	0	0	0	0	0	0	0	0	0	0	0	0	0	0	0	0	0	0	0	0	0	2	1	3	1	2	3	1	2	3	2	1	1	2	1	1	1	1	1	1	1	1	1
25539	男	1	0	0	0	0	0	0	0	0	0	0	0	0	0	0	0	0	0	0	0	0	0	0	0	0	0	3	1	3	2	1	1	1	1	2	2	1	1	1	2	2	1	1	1	2	1	1	2
26152	男	1	0	0	0	0	0	0	0	0	0	0	0	0	0	1	0	1	1	1	0	0	0	0	1	1	0	2	2	3	2	2	1	1	2	3	2	1	4	4	2	2	3	4	1	1	1	1	1
26931	男	0	0	0	0	0	0	0	0	0	0	0	0	0	0	1	0	1	1	0	1	1	0	1	1	0	1	2	1	2	1	2	1	1	2	3	2	1	1	1	1	1	1	1	1	1	1	1	1
26530	男	0	0	0	0	0	0	0	0	0	0	0	0	0	0	0	0	0	0	0	0	0	0	0	0	0	0	1	2	2	1	1	3	2	2	2	2	1	1	1	2	3	1	1	2	2	3	1	1
25511	男	0	0	0	0	0	0	0	0	0	0	0	0	0	0	1	0	0	1	0	1	1	0	1	1	0	1	2	2	2	2	2	4	1	2	2	2	1	1	1	2	2	2	2	1	1	1	1	1
26096	男	0	0	0	0	0	1	0	0	0	0	0	0	0	0	1	1	1	1	1	1	1	1	1	0	0	1	2	2	4	2	3	4	3	2	2	2	2	1	1	2	3	3	3	2	3	1	2	3
4955	女	0	0	0	0	0	0	0	0	0	0	0	0	0	0	1	1	1	1	1	0	1	1	1	1	0	1	3	3	5	4	3	3	2	2	5	5	3	4	3	3	3	3	3	3	3	4	3	4
26345	女	1	0	0	0	1	0	0	0	0	0	0	0	0	0	0	1	0	0	0	0	0	0	1	0	0	0	1	2	4	2	1	1	1	2	3	2	1	1	1	2	2	3	1	2	1	1	1	2
25809	女	0	0	0	0	0	0	0	0	0	0	0	0	0	0	1	0	0	1	0	1	0	0	0	0	0	0	2	3	2	4	2	2	2	2	3	4	1	1	1	1	1	1	1	2	1	1	1	1
26224	女	0	0	0	0	0	0	0	0	0	0	0	0	0	0	0	0	1	0	0	1	0	0	1	0	0	0	1	1	2	3	1	2	1	1	2	1	1	1	1	1	3	1	1	1	1	1	1	1
26729	女	0	0	0	1	0	0	0	0	0	0	0	0	0	0	0	0	0	0	0	1	0	0	0	0	0	0	2	2	2	2	2	2	2	1	2	1	1	1	1	2	2	2	2	1	1	1	1	1
4713	女	0	0	0	0	0	0	0	0	0	0	0	0	0	0	0	0	0	0	0	0	0	1	1	1	0	0	1	3	3	3	3	4	3	4	3	4	3	4	3	5	3	5	3	5	3	4	3	4
25774	女	0	0	0	0	0	0	0	0	0	0	0	0	0	0	1	1	1	1	1	1	1	1	1	1	1	1	3	3	3	3	2	2	2	2	2	2	1	1	2	3	4	1	2	3	4	1	2	3
26370	女	1	0	0	0	0	0	0	1	0	0	0	0	0	0	1	1	1	0	0	1	1	1	1	1	0	0	2	1	3	2	2	2	1	2	2	1	1	2	1	2	3	1	2	1	1	1	1	2
26311	女	1	0	0	0	0	0	0	0	0	0	0	0	0	0	1	0	0	0	0	0	0	0	0	0	0	0	2	1	2	2	1	1	1	1	2	1	1	1	1	1	2	1	1	2	2	1	1	2
26223	女	0	0	0	0	0	0	0	0	0	0	0	0	0	0	1	0	0	1	0	0	0	0	1	1	0	0	2	2	3	2	2	2	1	2	2	3	1	3	2	2	2	2	3	2	2	1	1	2
26551	女	0	0	0	0	0	0	0	0	0	0	0	0	0	0	0	0	0	0	0	0	0	0	1	0	0	1	3	1	3	2	1	1	1	1	2	1	1	1	3	2	3	1	1	3	1	1	1	3
26579	女	1	0	0	0	0	0	0	0	0	0	0	0	0	0	1	0	0	0	0	0	0	0	0	0	0	0	2	1	3	1	1	1	1	1	2	1	1	1	1	1	1	1	2	2	1	1	1	2
26510	女	1	0	0	0	0	0	0	0	0	0	0	0	0	0	1	0	0	1	0	0	0	0	1	1	1	1	2	2	3	3	2	1	2	1	2	1	1	1	1	1	1	1	1	2	3	4	2	2
26800	女	0	0	0	0	0	0	0	0	0	0	0	0	0	0	0	0	0	0	0	0	0	0	0	0	0	0	2	2	2	2	1	1	1	1	1	1	1	1	1	1	1	1	1	1	1	1	1	1
26513	女	0	0	0	0	0	0	0	0	0	0	0	0	0	0	0	0	0	0	1	1	1	0	1	0	1	0	2	1	2	2	2	2	2	1	2	2	2	3	5	2	2	3	2	1	2	3	2	3
25553	女	1	0	0	0	0	0	0	0	0	0	0	0	0	0	1	1	1	1	1	1	1	1	0	0	1	1	2	1	2	3	1	4	3	1	2	2	1	4	5	2	2	1	1	2	3	2	2	1
25259	女	0	0	0	0	0	0	0	0	0	0	0	0	0	0	1	1	1	0	0	0	0	0	0	0	0	0	2	2	2	2	2	2	1	3	3	1	1	1	1	2	2	1	3	1	2	4	2	3
26568	女	0	0	0	0	0	0	0	0	0	0	0	0	0	0	1	0	0	1	0	0	0	0	0	0	0	0	3	1	1	1	1	1	1	1	1	1	1	1	1	1	2	1	4	1	1	1	1	1
26989	女	0	0	0	0	0	0	0	0	0	0	0	0	0	0	1	0	0	0	1	0	0	0	0	0	0	0	1	1	2	2	1	1	1	1	1	1	1	1	1	1	1	1	2	1	1	1	1	1
26250	女	0	0	0	0	1	0	0	0	0	0	0	0	0	0	0	0	0	0	0	0	0	0	0	0	0	0	1	1	1	1	1	1	1	1	2	1	1	1	1	1	1	2	1	1	1	1	1	2
25901	女	0	0	0	0	0	0	0	0	0	0	0	0	0	0	0	0	0	0	0	0	0	0	0	0	0	0	2	2	2	2	2	1	1	1	2	1	1	1	1	2	2	2	1	1	1	1	1	1
25518	女	0	0	0	0	0	0	0	0	0	0	0	0	0	0	0	0	1	0	0	0	0	0	0	0	0	0	1	1	1	1	1	1	1	1	1	1	1	1	1	1	1	1	1	1	1	1	1	1
25686	女	0	0	0	0	0	0	0	0	0	0	0	0	0	0	0	0	0	0	0	0	0	0	1	1	0	0	2	2	3	2	2	1	3	2	3	2	2	2	1	2	2	1	2	2	2	2	3	3
25424	女	0	0	0	0	1	0	0	0	0	0	0	0	0	0	0	0	0	0	0	0	0	0	0	0	0	0	2	2	2	2	2	1	2	2	2	1	2	2	2	2	2	2	2	2	3	2	2	3
25571	女	0	0	0	0	0	0	0	0	0	0	0	0	0	0	0	0	0	0	0	0	0	0	1	0	1	0	2	2	2	2	2	2	1	1	2	2	1	1	3	2	2	2	2	1	1	1	1	1
6277	女	0	0	0	0	1	0	0	0	0	0	0	0	0	0	1	1	0	0	1	1	1	0	1	0	1	0	3	3	4	3	3	3	3	3	3	3	3	3	3	3	3	3	3	3	3	3	3	3
23557	女	0	0	1	0	1	0	0	0	0	0	0	0	0	0	1	1	0	1	0	1	0	0	0	0	1	0	3	1	2	2	1	1	2	2	1	1	1	1	3	1	1	2	2	1	1	1	1	1
26650	女	0	0	0	0	0	0	0	0	0	0	0	0	0	0	1	0	1	1	1	1	1	1	1	1	1	1	3	1	2	2	2	2	1	2	2	1	1	1	1	1	1	1	1	1	1	1	1	1
25791	女	0	0	0	0	0	1	0	0	0	0	0	0	0	0	1	1	1	1	1	1	1	1	1	1	1	1	2	1	4	3	2	2	2	1	1	1	1	3	3	3	4	4	3	1	1	1	1	2
26187	女	0	1	0	0	0	0	0	0	0	0	0	0	0	0	1	1	1	1	0	0	0	0	1	0	0	0	2	2	3	2	3	1	2	1	1	1	1	1	1	1	2	2	2	2	2	2	2	3
26864	女	0	0	0	0	0	0	0	0	0	0	0	0	0	0	1	0	0	1	0	0	0	0	0	0	0	0	2	2	2	1	1	1	1	2	2	1	1	1	1	1	2	2	1	2	2	1	2	2
25611	女	0	0	0	0	0	0	0	0	0	0	0	0	0	0	0	0	0	0	0	0	0	0	0	0	0	0	1	2	2	1	1	1	1	2	2	2	1	1	1	2	2	1	1	2	2	1	1	2
26036	女	0	0	0	0	1	0	0	0	0	0	0	0	0	0	1	1	1	0	1	1	0	0	1	0	1	0	2	1	3	2	1	1	1	1	3	3	1	3	4	3	2	3	4	2	3	3	3	4
27182	女	0	0	0	0	0	0	0	0	0	0	0	0	0	0	0	0	0	0	0	0	0	0	0	0	0	0	1	1	2	2	1	3	2	2	3	1	1	1	1	1	1	1	1	1	1	1	1	2
25623	女	0	0	0	0	0	0	0	0	0	0	0	0	0	0	0	0	1	1	0	0	0	0	1	0	0	0	4	2	3	4	1	1	1	3	4	3	1	1	4	2	4	4	2	2	2	2	1	2
25900	女	0	0	0	0	0	0	0	0	0	0	0	0	0	0	1	1	0	0	0	1	1	1	1	0	0	1	3	3	2	3	2	4	3	4	3	2	1	4	5	2	2	3	4	1	3	1	1	2
23727	女	1	0	0	0	1	0	0	1	0	0	0	0	0	0	1	1	0	0	0	0	0	0	0	0	0	0	1	1	4	3	1	1	1	1	3	5	1	1	1	1	1	1	1	1	1	1	1	1
25606	女	0	0	0	0	0	0	0	0	0	0	0	0	0	0	0	0	0	1	0	0	0	0	0	0	0	0	3	3	3	3	2	2	2	2	3	2	3	3	3	3	3	3	3	3	3	3	3	3
26322	男	1	0	0	0	0	0	0	0	0	0	0	0	0	0	1	0	1	1	0	0	0	0	1	0	0	0	2	2	2	3	2	1	1	1	1	1	1	1	1	1	1	1	1	1	1	1	1	3
26845	男	0	0	0	0	0	0	0	0	0	0	0	0	0	0	1	0	0	1	0	0	0	0	0	0	0	0	2	2	3	3	1	2	2	1	3	1	1	1	1	3	2	1	1	1	1	1	1	4
15081	男	1	0	0	0	1	0	0	0	0	0	0	0	0	0	1	1	0	1	1	1	1	0	1	1	1	1	3	3	3	3	2	2	2	2	3	2	3	3	5	2	2	2	2	2	2	2	2	2
15478	男	0	0	0	0	0	0	0	0	0	0	0	0	0	0	1	1	0	1	1	0	0	1	0	1	0	0	3	3	2	2	2	2	2	2	2	2	2	2	3	2	2	2	3	2	2	2	2	2
26587	男	0	0	0	0	0	0	0	0	0	0	0	0	0	0	0	0	0	0	0	0	0	0	0	0	0	0	2	1	2	1	1	1	2	1	1	1	1	1	1	1	1	1	1	1	1	1	1	1
5048	男	0	0	0	0	0	0	0	0	0	0	0	0	0	0	1	0	0	0	0	0	1	0	0	0	0	1	2	2	2	1	1	2	2	2	2	2	3	3	4	1	2	1	2	2	2	3	2	3
5173	男	0	0	0	0	1	0	0	1	0	0	0	1	0	1	1	1	0	1	0	1	1	1	1	1	1	1	3	3	4	3	2	3	4	3	4	4	3	4	5	2	4	2	3	3	4	4	2	3
26419	男	0	0	0	0	1	0	0	0	0	0	0	0	0	0	0	0	0	0	0	0	0	0	0	0	0	0	2	2	2	3	2	1	3	2	2	1	1	3	4	3	2	3	3	3	1	1	1	3
5105	男	0	0	0	0	1	0	0	0	0	0	0	0	0	0	1	1	0	1	1	1	1	1	1	1	1	1	2	3	3	3	5	1	4	4	3	3	3	1	2	2	3	4	4	2	2	1	1	4
14959	男	1	0	0	0	0	0	0	0	0	0	0	0	0	0	1	1	1	1	1	1	1	0	1	1	1	0	3	2	3	3	2	4	3	4	4	2	1	2	1	3	4	3	2	2	4	4	3	4
25532	男	0	0	0	0	0	0	0	0	0	0	0	0	0	0	0	1	0	0	1	1	0	0	1	0	1	0	2	1	1	1	1	1	1	1	2	2	1	1	1	2	2	1	1	1	1	1	1	1
26291	女	0	0	0	0	0	0	0	0	0	0	0	0	0	0	0	0	1	1	1	1	0	1	1	0	0	0	2	1	3	2	2	2	3	1	3	1	1	2	2	1	1	1	1	3	4	1	1	2
25877	女	0	0	0	0	0	0	0	0	0	0	0	0	0	0	1	0	0	0	1	0	0	1	0	0	1	0	1	1	2	1	1	1	1	1	1	1	1	1	1	1	1	1	1	1	1	1	1	1
25948	女	1	0	0	0	0	0	0	0	0	0	0	0	0	0	0	0	0	0	0	0	0	1	1	0	0	0	2	2	2	4	2	1	1	1	2	1	1	1	1	1	1	1	1	1	1	1	1	1
26171	女	1	1	0	0	0	0	0	0	0	0	0	0	0	0	1	0	1	0	0	1	1	0	0	0	1	0	1	1	3	2	1	1	1	1	2	1	1	1	1	1	1	2	2	1	1	1	1	2
25959	女	1	0	0	0	0	1	0	0	0	0	0	1	0	0	0	1	1	0	0	0	0	0	0	1	1	0	2	1	1	2	1	2	1	1	1	1	1	1	1	1	2	1	2	1	2	2	3	3
25769	女	1	0	0	0	0	0	0	0	0	0	0	0	0	0	0	1	0	1	0	0	0	0	0	0	0	0	2	1	2	2	2	2	3	1	2	1	1	1	1	2	1	1	1	1	1	1	1	1
26197	女	0	0	0	0	0	0	0	0	0	0	0	0	0	0	0	0	0	0	0	0	0	0	1	0	0	0	2	2	2	2	1	2	1	1	2	2	3	3	3	2	2	2	2	1	2	2	2	2
25989	女	0	0	0	0	0	0	0	0	0	0	1	0	0	0	1	0	0	1	0	0	0	0	0	0	0	0	1	1	4	1	2	1	2	1	1	1	1	1	1	1	1	1	1	1	1	1	1	3
26116	女	0	0	0	0	0	0	0	0	0	0	0	0	0	0	1	1	0	1	1	0	1	1	0	0	0	0	2	2	2	2	2	2	2	2	1	1	1	1	1	1	1	1	1	1	2	1	1	2
25888	女	1	0	0	0	0	0	0	0	0	0	0	0	0	0	1	1	0	0	1	0	1	1	1	1	1	0	2	2	2	2	1	2	1	1	2	3	1	3	4	1	2	1	1	2	2	3	2	4
25752	女	1	0	0	0	0	0	0	0	0	0	0	0	0	0	1	0	0	1	0	0	0	0	1	0	0	0	2	3	3	2	2	1	1	1	2	1	1	2	4	2	2	1	2	2	1	1	1	2
26304	女	0	0	0	0	0	0	0	0	0	0	0	0	0	0	1	1	1	0	1	0	1	0	1	0	0	0	2	1	3	1	1	1	1	1	2	1	1	1	1	1	1	2	2	2	1	1	1	2
25750	女	0	0	0	0	0	0	0	0	0	0	0	0	0	0	0	0	0	1	0	0	0	1	1	0	0	0	2	2	2	1	2	2	2	3	3	1	1	1	3	1	1	3	1	1	1	1	1	3
7795	女	1	0	0	0	0	0	0	0	0	0	0	0	0	0	1	1	1	0	1	0	0	0	1	1	0	0	3	3	3	3	2	2	1	3	3	3	4	4	5	2	3	3	3	3	4	2	3	4
25882	女	0	0	0	0	1	0	0	0	0	0	1	0	0	0	0	0	0	0	0	0	0	0	1	0	0	0	1	1	4	3	1	1	1	1	1	1	1	1	1	1	1	1	1	2	2	1	1	2
25495	女	0	0	0	0	0	0	0	0	0	0	0	0	0	0	1	1	1	1	0	1	1	1	0	0	1	0	2	2	2	2	2	1	1	1	2	1	1	1	1	2	2	1	1	1	2	3	2	4
26285	女	0	0	0	0	0	0	0	0	0	0	0	0	0	0	1	1	0	0	0	0	1	0	1	0	1	0	2	2	3	3	1	1	3	2	3	2	1	1	1	2	3	3	3	2	3	4	3	4
26279	女	0	0	0	0	0	0	0	0	0	0	0	0	0	0	1	0	1	1	0	1	0	0	1	1	0	1	3	4	2	2	1	1	1	1	1	1	1	1	3	2	3	2	2	1	3	2	1	3
25872	女	0	0	0	0	1	0	0	0	0	0	0	0	0	0	1	1	0	1	0	1	0	0	1	1	1	1	3	1	2	2	2	2	2	3	3	1	1	2	1	2	4	3	1	1	1	1	1	3
26353	女	0	0	0	0	0	0	0	0	0	0	0	0	0	0	1	1	1	1	0	1	1	0	1	0	1	0	2	2	2	2	1	2	1	2	2	2	1	1	1	1	1	1	1	1	1	1	1	2
25576	女	0	0	0	0	1	0	0	0	0	0	1	0	0	0	0	0	0	0	0	0	0	0	0	0	0	0	1	1	1	1	1	1	1	1	1	1	1	1	1	1	1	1	1	1	1	1	1	1
25552	女	0	0	0	1	1	0	0	0	0	0	0	0	0	0	1	1	1	0	0	0	0	0	0	0	0	0	2	1	3	2	2	3	1	1	1	1	1	1	1	2	2	3	4	3	3	2	2	3
26347	女	0	1	0	0	1	0	0	0	0	0	0	0	0	0	1	0	0	1	0	1	0	0	0	0	0	0	2	1	2	1	2	1	1	1	2	2	1	1	1	1	1	3	1	1	1	1	1	1
26056	女	1	0	0	0	0	0	0	1	0	0	0	0	0	0	1	0	0	0	0	0	0	0	0	0	0	0	1	1	2	2	2	1	1	1	2	1	1	3	3	1	1	2	4	1	1	1	1	1
14739	女	0	1	0	0	1	0	0	1	0	0	0	0	0	0	1	1	0	1	1	1	1	0	1	1	1	1	2	1	1	1	1	2	1	1	3	1	1	3	1	1	1	3	1	1	1	1	1	1
26026	女	0	0	0	0	1	0	0	1	0	0	0	0	0	0	1	1	1	1	1	0	1	1	1	0	0	0	2	2	3	1	3	1	4	1	3	1	1	1	1	2	2	4	3	2	1	1	1	3
25516	女	1	0	1	0	1	0	0	0	0	0	0	0	0	0	1	1	1	1	1	1	1	1	1	0	0	0	1	1	1	3	5	4	1	1	1	2	1	1	1	1	2	3	3	3	1	1	1	4
25643	女	0	0	1	0	1	0	0	0	0	0	0	0	0	0	0	0	0	0	0	0	0	0	0	0	0	0	1	1	3	2	2	1	1	2	3	2	1	1	3	3	3	3	3	3	5	3	3	3
25607	女	0	0	0	0	0	0	0	0	0	0	0	0	0	0	1	0	0	0	0	0	1	0	1	1	0	1	3	2	3	2	3	3	2	3	2	3	4	4	4	3	2	3	4	1	3	1	3	2
25635	女	0	0	0	0	0	0	0	0	0	0	0	0	0	0	1	1	0	0	0	0	0	0	0	0	0	0	2	2	2	2	1	1	1	1	2	1	1	1	1	1	2	1	1	1	1	1	1	3
25496	女	0	0	0	0	0	0	0	0	0	0	0	0	0	0	1	0	0	0	1	1	1	0	1	0	0	0	1	1	3	1	1	2	1	1	2	1	1	1	1	1	2	1	1	1	1	1	1	2
25982	女	0	0	0	0	0	0	0	0	0	0	0	0	0	0	1	0	0	0	0	0	0	0	0	0	0	0	2	1	2	2	2	3	1	1	1	1	1	1	1	1	1	1	1	1	1	1	1	1
26344	女	0	0	0	0	0	0	0	0	0	0	1	1	0	0	1	1	1	1	1	1	1	0	0	0	1	0	1	1	2	1	3	1	1	1	1	1	1	1	1	1	1	2	1	1	1	1	1	1
10140	男	0	0	0	0	1	0	0	0	0	0	0	0	0	0	1	1	1	1	1	1	1	1	1	1	1	1	3	3	3	3	2	2	3	4	4	3	2	2	4	3	3	3	4	3	3	4	4	4
6231	男	1	0	0	0	0	0	0	0	0	0	0	0	0	0	1	0	0	0	0	1	0	0	0	0	0	0	2	3	3	3	1	2	2	2	4	3	4	3	4	3	4	3	4	2	4	3	3	2
25008	男	1	0	0	0	0	0	0	0	0	0	0	0	0	0	1	0	0	0	0	0	0	0	0	0	0	0	1	1	1	1	1	1	1	1	1	1	1	1	2	2	2	3	1	1	3	1	1	1
25747	男	0	0	0	0	0	0	0	0	0	0	0	0	0	0	0	0	0	0	0	0	0	0	0	0	0	0	2	3	2	3	1	1	1	3	2	4	1	4	4	2	2	1	5	1	3	1	1	1
4057	男	0	1	0	0	0	1	0	1	1	1	0	0	0	0	1	1	1	1	1	1	1	1	1	1	1	1	2	2	3	2	2	1	1	1	2	1	2	1	2	1	1	2	2	1	3	1	1	4
26059	男	1	1	1	0	0	0	0	0	0	0	0	0	0	0	0	0	0	0	0	0	0	0	0	0	0	0	1	1	1	1	1	1	1	1	1	1	1	1	1	1	1	1	1	1	1	1	1	1
26329	男	0	0	0	0	0	0	0	0	0	0	0	0	0	0	0	0	0	0	0	0	0	0	1	0	0	0	2	1	3	1	1	1	2	2	2	1	1	1	1	1	1	1	1	1	1	1	1	2
3310	男	0	0	0	0	0	0	0	0	0	0	0	0	0	0	1	0	1	1	1	1	1	1	0	1	1	1	2	3	4	2	2	5	1	5	3	2	1	1	1	1	1	1	1	1	1	1	1	1
15619	女	0	0	0	0	0	0	0	0	0	0	0	0	0	0	1	1	0	1	1	1	0	0	1	0	1	0	3	3	2	2	2	3	1	2	2	2	1	1	1	2	2	2	2	1	1	1	1	2
26495	女	0	1	0	0	1	0	0	0	0	0	0	0	0	0	1	1	0	0	1	0	1	1	0	0	1	0	2	2	3	2	3	1	2	2	3	2	1	2	2	1	2	4	2	3	3	3	2	3
26448	女	1	0	0	0	0	0	0	0	0	0	0	0	0	0	0	0	0	0	0	0	0	0	0	0	0	0	2	1	2	1	1	1	1	1	1	1	1	1	3	2	1	1	1	1	1	1	1	1
26981	女	0	0	0	0	0	0	0	0	0	0	0	0	0	0	1	1	1	1	1	1	1	0	0	1	0	0	2	1	3	3	2	1	1	1	2	1	1	1	1	1	1	1	1	1	1	1	1	2
5033	女	0	0	0	0	0	0	0	0	0	0	0	0	0	0	1	1	1	1	1	1	1	1	1	1	1	1	1	2	2	2	3	2	1	2	2	2	1	1	1	1	2	2	2	1	1	1	1	3
26209	女	1	0	0	0	1	0	0	0	0	0	0	0	0	0	0	0	0	0	0	0	0	0	0	0	0	0	2	2	2	2	2	2	2	2	2	3	1	2	2	2	2	2	2	2	2	2	2	2
26822	女	0	0	0	0	0	0	0	0	0	0	0	0	0	0	1	0	0	1	0	1	1	1	1	1	0	0	1	1	3	2	1	1	1	1	2	1	1	1	1	1	1	1	1	1	1	1	1	4
25717	女	0	0	0	0	0	0	0	0	0	0	0	0	0	0	1	0	0	1	0	0	1	0	0	1	0	0	1	1	2	3	2	1	3	1	1	1	1	1	1	2	1	1	1	2	1	1	1	3
26505	女	1	0	0	0	0	0	0	0	0	0	0	0	0	0	1	0	0	0	0	0	0	0	1	0	0	0	2	2	2	2	2	2	1	2	2	2	1	2	1	1	1	1	1	1	1	1	1	1
26273	女	0	0	0	0	0	0	0	0	0	0	0	0	0	0	1	1	1	1	1	1	1	1	1	1	1	0	3	1	2	2	1	4	2	2	1	2	1	1	1	2	3	1	2	2	3	1	1	2
26897	女	0	0	0	0	0	0	0	0	0	0	0	0	0	0	0	0	1	1	0	1	0	0	1	0	0	0	2	2	2	2	1	1	1	2	3	2	1	1	1	3	3	2	3	3	3	1	1	2
26461	女	0	0	0	0	0	0	0	0	0	0	0	0	0	0	1	0	0	1	0	0	0	0	0	0	0	0	3	1	3	2	1	1	2	1	4	1	1	1	1	2	2	1	1	1	1	1	1	2
27172	女	0	1	0	0	0	0	0	0	0	0	0	0	0	0	1	0	0	0	1	1	0	0	0	0	1	0	2	3	2	2	2	2	1	2	2	2	1	1	2	2	3	2	2	2	3	2	2	2
27185	女	0	0	0	0	0	0	0	0	0	0	0	0	0	0	1	0	1	0	0	0	0	0	0	0	0	0	3	3	1	1	1	1	1	1	1	1	1	1	1	1	1	1	1	1	1	1	1	1
26852	女	1	0	0	0	0	0	0	0	0	0	1	0	0	0	1	1	0	1	1	0	1	0	0	0	0	0	2	1	1	1	1	1	1	1	1	1	1	1	1	1	1	1	1	1	1	1	1	1
26194	女	0	1	0	0	0	0	0	0	0	0	0	0	0	0	1	0	1	0	0	1	0	0	1	0	0	0	2	3	2	2	1	1	1	1	1	1	1	1	2	1	3	3	3	1	4	1	2	1
26470	女	0	0	0	0	1	0	0	0	0	0	0	0	0	0	0	0	0	1	0	1	1	1	0	0	0	0	2	1	2	2	1	1	4	1	1	1	1	1	1	1	2	2	2	1	1	1	1	2
26439	女	0	0	0	0	0	0	0	0	0	0	1	0	0	0	1	1	1	0	0	1	1	1	1	0	1	0	1	2	3	1	1	1	1	2	3	2	1	1	1	2	1	3	1	1	1	1	1	2
27109	女	0	0	0	0	1	0	0	0	0	0	0	0	0	0	1	0	1	1	0	1	1	0	1	0	0	1	3	3	3	3	2	1	1	1	1	1	1	1	1	1	2	3	2	2	1	1	1	3
26946	女	0	0	0	0	1	0	0	0	0	0	0	0	0	0	0	1	0	0	0	0	0	0	1	0	1	0	2	2	2	3	3	2	1	2	3	1	1	3	1	1	1	3	1	1	1	1	1	1
26574	女	0	0	0	0	0	0	0	0	0	0	0	0	0	0	1	0	1	0	0	0	0	0	1	0	0	0	2	2	2	2	1	1	1	2	3	2	1	1	1	1	1	1	1	1	1	1	1	1
26655	女	0	1	0	0	1	0	0	0	0	1	0	0	0	0	1	1	0	0	1	0	0	0	0	0	1	0	2	1	3	1	2	1	2	1	3	2	1	3	4	2	2	3	3	3	3	2	1	1
26836	女	0	0	0	0	0	0	0	0	0	0	0	0	0	0	0	0	0	1	0	0	1	0	1	1	0	0	2	3	3	4	3	1	1	3	3	3	1	4	4	3	3	3	4	3	4	3	3	4
26617	女	0	0	0	0	1	0	0	0	0	0	0	0	0	0	1	1	0	0	0	0	0	0	1	0	1	1	3	1	3	3	1	2	2	4	2	1	1	1	1	2	3	4	1	3	1	1	1	3
27124	女	0	0	0	0	0	0	0	0	0	0	0	0	0	0	0	0	0	1	0	0	0	0	1	0	0	0	3	2	2	2	1	3	4	1	2	1	2	2	2	1	3	3	3	1	4	3	4	3
26985	女	1	0	0	0	0	0	0	0	0	0	0	0	0	0	1	0	0	0	0	0	0	0	0	0	0	0	2	2	2	1	2	1	2	1	2	1	1	1	1	2	1	2	2	1	1	1	1	2
25846	女	0	0	0	0	0	0	0	0	0	0	0	0	0	0	1	0	0	1	0	0	0	0	1	0	0	0	2	2	3	1	2	1	1	2	2	1	1	3	1	2	2	1	1	3	1	1	1	1
25970	女	0	0	0	0	1	0	0	0	0	0	0	0	0	0	1	1	1	1	1	1	1	1	0	0	1	0	2	4	3	3	3	3	2	3	3	2	1	1	1	1	3	3	2	1	2	1	1	2
26754	女	0	0	0	0	1	0	0	0	0	0	0	0	0	0	1	0	0	0	0	0	0	0	0	0	0	0	2	2	3	2	2	1	1	2	2	1	1	1	2	2	2	2	3	2	3	1	1	3
26694	女	0	0	0	0	0	0	0	0	0	0	0	0	0	0	0	0	0	1	0	0	0	0	1	0	0	0	2	2	3	2	2	1	1	1	3	2	2	1	1	2	2	1	1	1	1	1	1	2
25639	女	0	0	0	0	1	0	0	0	0	0	0	0	0	0	1	1	0	0	0	0	0	0	0	0	0	0	1	1	3	2	1	1	2	1	2	2	1	1	1	1	2	1	1	1	1	1	1	1
26091	女	1	1	0	0	0	0	0	0	0	0	0	0	0	0	1	0	0	0	0	0	0	0	1	0	0	0	2	2	3	3	3	2	2	2	3	2	1	1	1	2	3	2	2	2	1	1	1	2
14802	女	0	0	0	0	0	0	0	0	0	0	0	0	0	0	1	0	0	0	0	0	0	0	0	1	0	0	1	1	1	3	1	1	1	2	3	1	1	3	1	1	2	2	1	1	1	1	1	1
26921	女	0	0	0	0	1	0	0	0	0	0	0	0	0	0	1	0	1	0	1	0	0	0	0	0	0	0	1	1	1	1	1	1	1	1	1	1	1	1	1	1	1	1	1	1	1	1	1	1
26849	女	1	0	0	0	0	0	0	0	0	0	0	0	0	0	1	0	0	0	0	0	0	1	1	0	0	0	2	1	2	2	1	1	1	1	2	1	1	1	2	2	2	1	2	1	1	1	1	2
25666	女	0	0	0	0	0	0	0	0	0	0	0	0	0	0	0	0	0	1	0	0	0	0	1	0	0	0	1	1	2	2	2	1	1	2	2	1	1	1	1	1	1	1	1	2	1	1	1	2
27096	女	1	1	0	0	0	0	0	0	0	0	0	0	0	0	1	0	0	1	0	0	0	0	1	0	0	0	1	2	2	2	1	1	1	1	2	2	1	1	2	1	2	1	2	1	1	1	1	2
26086	女	0	0	0	0	1	0	0	0	0	0	0	0	0	0	1	0	0	0	1	0	0	0	0	0	1	0	1	1	1	1	1	1	1	2	2	1	1	1	1	1	1	2	1	2	3	1	1	1
27194	女	0	0	0	0	0	0	0	0	0	0	0	0	0	0	0	0	0	0	0	1	0	0	1	0	0	0	2	2	2	2	1	1	1	2	2	1	1	1	1	1	1	1	1	1	1	1	1	3
26004	男	1	0	0	0	0	0	0	0	0	0	0	0	0	0	1	0	1	1	0	0	0	1	1	0	0	0	2	1	2	1	1	2	1	1	2	1	1	2	3	1	1	1	1	1	1	1	1	2
6350	男	1	0	0	0	0	0	0	0	0	0	0	0	0	0	1	1	1	0	0	0	0	0	0	0	0	0	2	2	2	2	2	2	2	3	2	3	3	3	3	3	2	3	4	2	3	3	3	3
27507	男	0	0	0	0	0	0	0	0	0	0	0	0	0	0	1	0	0	0	0	0	0	0	0	0	0	0	2	2	2	1	1	1	1	1	1	1	1	1	1	1	1	1	1	1	1	1	1	1
26920	男	1	0	0	0	1	0	0	0	0	0	0	0	0	0	0	0	1	1	1	0	0	0	0	1	1	1	2	1	2	2	2	2	2	2	2	1	1	1	1	2	3	3	2	1	1	1	1	2
26546	男	1	0	0	0	0	0	0	0	0	0	0	0	0	0	1	0	0	0	0	0	1	0	0	0	0	0	2	2	3	3	2	3	1	2	2	1	1	1	1	1	1	1	1	1	1	1	1	3
26328	男	0	0	0	0	0	0	0	0	0	0	0	0	0	0	1	1	0	0	1	0	1	1	1	0	0	1	2	1	3	2	1	1	1	1	2	2	1	1	1	1	1	1	1	1	2	1	1	3
26349	男	0	0	0	0	0	1	0	0	0	0	0	0	1	0	1	1	1	1	1	1	0	0	1	0	0	0	3	4	3	2	2	2	4	2	3	2	4	4	5	3	4	4	3	2	3	4	4	4
27189	男	0	0	0	0	0	0	0	0	0	0	0	0	0	0	1	1	0	1	0	0	0	1	1	0	1	1	3	4	2	3	1	1	1	1	3	1	1	1	1	3	4	2	3	2	2	3	1	4
26569	男	0	0	0	0	0	0	0	0	0	0	0	0	0	0	1	1	0	1	1	0	0	0	0	0	1	1	1	2	3	1	1	2	1	1	2	3	1	1	3	3	3	2	4	2	3	2	2	2
26463	女	1	0	0	0	0	0	0	0	0	0	0	0	0	0	1	0	0	0	0	1	0	0	0	0	0	0	2	2	2	2	2	1	1	1	1	1	1	1	1	1	1	1	1	1	1	1	1	1
26355	女	1	1	0	0	0	0	0	0	0	0	0	0	0	0	1	0	0	0	0	1	0	0	1	0	0	0	2	2	2	2	2	2	1	2	2	2	2	2	3	2	2	2	2	2	2	2	2	2
26354	女	1	0	0	0	0	0	0	0	0	0	0	0	0	0	1	1	0	1	0	1	1	1	1	1	0	0	3	2	2	4	2	1	2	3	3	1	1	3	3	3	3	1	1	2	1	1	1	3
26687	女	1	0	0	0	0	0	0	0	0	0	0	0	0	0	0	0	0	0	0	0	0	0	0	0	0	0	2	2	2	2	1	2	2	1	1	1	1	1	2	2	2	1	1	2	2	3	2	2
25899	女	1	0	0	0	0	0	0	0	0	0	0	0	0	0	1	0	0	0	1	0	0	0	1	1	0	1	2	3	2	3	1	2	1	1	3	1	1	1	3	3	3	1	2	3	4	4	2	3
26979	女	0	0	0	0	0	0	0	0	0	0	0	0	0	0	1	1	1	1	1	0	0	0	1	0	1	0	1	1	1	1	1	1	2	1	2	1	1	3	1	1	2	2	1	2	1	1	1	2
26953	女	0	0	0	0	0	0	0	0	0	0	0	0	0	0	1	0	0	0	0	1	0	0	1	0	1	0	2	1	2	1	1	1	1	1	2	1	1	2	3	2	3	1	1	2	3	1	1	3
25637	女	0	0	0	0	0	0	0	0	0	0	0	0	0	0	1	1	0	1	0	1	1	0	1	0	1	0	2	1	3	2	1	1	1	2	2	1	1	1	1	1	2	1	1	1	2	1	1	1
26484	女	1	1	1	0	1	1	0	0	0	0	0	0	0	0	1	0	0	1	0	1	0	0	1	0	1	0	3	4	3	3	2	2	1	1	2	2	3	3	4	2	3	2	4	1	1	1	1	4
26955	女	0	0	0	0	0	0	0	0	0	0	0	0	0	0	0	0	0	0	0	0	0	0	0	0	0	0	1	1	2	1	1	1	1	1	1	1	1	1	1	1	2	1	1	1	1	1	1	1
15214	女	0	0	0	0	0	0	0	0	0	0	0	0	0	0	0	0	0	1	0	0	0	0	0	0	1	0	2	2	2	2	1	1	1	1	1	2	1	1	1	1	1	1	1	1	2	1	1	2
26367	女	1	0	0	0	0	0	0	0	0	0	0	0	0	0	1	0	0	1	0	0	0	0	0	0	0	0	2	2	2	2	1	1	1	1	2	1	1	1	1	1	1	1	1	1	1	1	1	2
26317	女	1	0	0	0	0	0	0	0	0	0	0	0	0	0	1	0	0	0	0	0	0	0	1	0	0	0	2	1	3	3	1	2	1	1	2	1	1	1	1	1	1	1	1	1	1	1	1	1
26598	女	0	1	0	0	0	0	0	0	0	0	0	0	0	0	0	0	0	0	0	0	0	0	0	0	0	0	1	1	1	1	1	1	1	1	1	1	1	1	1	1	1	2	1	1	1	1	1	1
26215	女	0	0	0	0	0	0	0	0	0	0	0	0	0	0	0	0	0	0	0	0	0	0	0	0	0	0	1	1	1	1	2	1	1	1	1	1	1	1	1	1	1	1	1	1	1	1	1	2
25463	女	0	0	0	0	0	0	0	0	0	0	0	0	0	0	0	0	0	0	0	0	0	0	0	0	0	0	1	1	2	2	1	1	1	1	2	1	1	1	1	1	1	1	1	1	1	1	1	2
26611	女	0	0	0	0	0	0	0	0	0	0	0	0	0	0	1	0	1	1	0	1	1	0	1	0	1	0	2	1	2	2	2	2	1	2	3	1	1	1	1	1	3	1	1	2	1	1	1	3
26642	女	0	0	0	0	0	0	0	0	0	0	0	0	0	0	1	0	0	1	1	0	0	0	1	0	1	1	2	1	2	2	1	1	1	1	1	1	1	1	1	1	1	1	1	1	1	1	1	1
27705	女	0	0	0	0	1	0	0	0	0	0	0	0	0	0	0	0	0	0	0	0	1	1	1	1	0	0	2	2	3	4	2	1	1	2	3	2	1	1	1	2	3	3	1	4	1	1	1	4
26358	女	0	0	0	0	0	0	0	0	0	0	0	0	0	0	1	0	1	1	0	0	1	0	1	0	0	0	1	1	1	1	1	1	1	1	1	1	1	1	1	1	2	1	1	1	1	1	1	1
25914	女	0	0	0	0	0	0	0	0	0	0	0	0	0	0	0	0	0	0	0	0	0	0	0	0	0	0	1	1	1	1	1	1	1	1	1	1	1	1	1	1	1	1	1	1	1	1	1	1
26248	女	0	0	0	0	0	0	0	0	0	0	0	0	0	0	1	1	1	0	1	1	0	1	1	0	0	0	2	2	3	2	2	1	1	2	2	2	1	2	2	1	3	2	2	2	2	2	2	2
26948	女	0	0	0	0	0	0	0	0	0	0	0	0	0	0	0	0	0	0	1	0	0	0	0	0	0	0	2	2	2	2	1	1	1	1	1	1	1	1	2	1	1	1	1	1	2	1	1	1
26912	女	0	0	0	0	0	0	0	0	0	0	0	0	0	0	0	0	0	0	0	0	0	1	0	0	0	0	1	1	2	2	1	1	1	1	1	1	1	1	1	2	1	1	1	1	1	1	1	2
25818	女	0	0	0	0	1	0	0	0	0	0	1	0	0	0	1	1	1	1	1	1	1	1	1	1	1	1	3	4	3	3	3	1	2	3	3	1	1	2	2	3	3	3	3	3	3	1	1	3
26524	女	0	0	0	0	1	0	0	1	0	0	0	0	0	0	1	1	0	1	1	0	0	1	0	0	0	0	3	1	3	2	2	2	3	4	3	1	1	1	2	2	1	3	5	2	1	3	1	2
29224	女	0	0	0	0	0	0	0	0	0	0	0	0	0	0	1	0	1	1	0	0	0	0	0	0	0	0	2	1	1	1	1	1	1	1	1	1	1	1	1	1	1	1	2	1	1	1	1	3
26961	女	0	0	0	0	1	0	0	0	0	0	0	0	0	0	1	0	0	0	0	0	0	0	0	0	0	0	2	2	2	1	1	2	1	1	2	1	1	1	1	1	1	3	2	1	1	1	1	1
25793	女	0	0	0	0	0	0	0	0	0	0	0	0	0	0	0	0	0	0	0	0	0	0	0	0	0	0	1	1	2	1	2	1	1	1	1	1	1	1	1	1	1	1	1	1	1	1	1	1
26409	女	1	0	0	0	1	0	0	0	0	0	0	0	0	0	1	1	0	1	1	1	1	1	0	1	1	1	1	1	1	3	3	1	1	3	1	1	1	1	1	1	1	2	1	1	1	1	1	1
26210	女	0	0	0	0	1	0	0	0	0	0	0	0	0	0	1	0	1	0	0	0	0	0	0	0	0	0	1	1	2	1	1	1	1	1	2	1	1	1	1	1	1	1	1	1	1	1	1	2
26988	女	0	0	0	0	1	0	0	0	0	0	0	0	0	0	1	1	0	1	1	1	1	0	1	1	1	1	2	2	3	3	2	1	2	1	2	1	1	1	1	1	3	3	3	2	3	1	1	2
4353	女	0	0	0	0	0	0	0	0	0	0	0	0	0	0	1	1	1	0	0	1	1	0	1	1	1	0	2	3	3	3	1	2	3	4	3	3	3	2	1	1	2	2	2	3	3	3	3	3
26722	女	0	0	0	0	0	0	0	0	0	0	0	0	0	0	1	1	1	0	1	0	1	0	1	0	1	1	2	3	4	3	2	1	1	1	2	1	1	1	1	1	3	1	3	3	4	1	4	1
26003	女	0	0	0	0	0	0	0	0	0	0	0	0	0	0	1	0	0	0	0	0	0	0	0	0	0	0	1	1	1	1	1	1	1	1	1	1	1	1	1	1	1	1	1	1	1	1	1	1
25421	女	0	0	0	0	0	0	0	0	0	0	0	0	0	0	1	1	1	0	0	0	0	0	0	0	0	0	1	1	1	1	1	1	1	1	1	1	1	1	1	1	1	1	1	1	1	1	1	1
25968	女	0	0	0	0	0	0	0	0	0	0	0	0	0	0	0	0	0	0	0	0	0	0	0	0	0	0	1	1	2	3	2	1	1	1	1	1	1	1	1	2	1	2	3	1	1	1	1	1
26746	女	0	0	0	0	0	0	0	0	0	0	0	0	0	0	1	1	1	1	1	0	0	0	1	0	0	1	4	3	4	4	2	2	1	4	2	1	1	1	1	3	2	2	1	1	3	1	1	3
25826	男	0	0	0	0	0	0	0	0	0	0	0	0	0	0	0	0	0	0	0	0	0	0	0	0	0	0	1	2	4	1	1	1	1	1	3	2	1	1	3	1	3	1	1	1	4	4	4	4
25810	男	0	0	0	0	0	0	0	0	0	0	0	0	0	0	0	0	0	0	0	0	0	0	0	0	0	0	2	2	2	2	1	1	1	2	1	1	1	4	4	2	2	2	2	2	2	2	2	2
26341	男	1	0	0	0	0	0	0	0	0	0	0	0	0	0	1	1	1	1	1	1	1	1	1	1	1	1	2	2	2	2	2	2	2	2	2	2	1	1	1	2	2	1	2	1	2	2	1	2
26478	男	0	0	0	0	0	0	0	0	0	0	0	0	0	0	1	0	0	0	0	0	0	0	1	1	0	0	1	2	3	2	3	1	1	1	2	1	1	1	2	2	3	3	4	2	3	2	2	3
26947	男	0	0	0	0	0	0	0	0	0	0	0	0	0	0	1	0	0	1	1	0	1	1	0	1	1	0	3	4	3	3	3	3	4	3	3	3	3	3	4	2	2	3	3	2	2	1	1	3
26939	男	0	0	0	1	0	0	0	0	0	0	0	0	0	0	1	1	1	1	1	0	1	0	1	0	1	0	3	1	2	3	3	1	3	1	1	1	1	1	1	1	1	3	3	1	1	1	1	1
25848	男	0	0	0	0	1	0	0	0	1	0	0	0	0	0	1	1	0	0	1	0	1	0	1	0	0	1	1	3	2	2	2	2	2	2	2	2	5	2	4	3	2	3	4	2	1	1	1	2
4231	女	0	0	0	0	0	0	0	0	0	0	1	1	0	0	1	1	1	1	1	1	1	1	1	1	1	0	3	4	3	4	3	5	1	3	4	3	1	2	3	1	2	4	4	1	1	1	1	3
26835	女	1	0	0	0	0	0	0	0	0	0	0	0	0	0	1	1	0	0	1	1	0	0	1	1	1	1	3	1	3	2	1	1	1	1	3	2	1	3	4	3	3	2	2	1	4	1	1	3
27183	女	1	0	0	0	0	0	0	0	0	0	0	0	0	0	1	1	1	0	1	0	0	0	1	0	1	0	2	1	2	3	2	2	1	1	2	1	1	2	2	2	2	1	1	1	2	1	1	1
27165	女	0	0	0	0	0	0	0	0	0	0	0	0	0	0	1	1	1	1	1	1	1	1	1	1	1	1	3	2	3	3	1	1	3	1	1	1	1	1	1	4	4	1	1	1	1	1	1	4
3301	女	0	0	0	0	1	0	0	0	0	0	0	0	1	0	1	1	1	1	1	1	0	1	1	1	1	1	3	3	3	3	3	3	3	3	3	3	3	3	3	3	3	3	3	3	3	3	3	3
26969	女	1	0	0	0	0	0	0	0	0	0	0	0	0	0	1	0	0	0	0	1	0	0	0	0	0	0	1	1	1	1	1	1	1	1	1	1	1	1	1	1	1	1	1	1	1	1	1	1
25681	女	0	0	0	0	0	0	0	0	0	0	0	0	0	0	1	1	1	1	0	1	0	0	1	1	1	0	3	3	3	3	1	1	2	2	3	1	1	1	1	3	1	2	1	1	1	1	1	2
26080	女	1	0	0	0	0	0	0	0	0	0	0	0	0	0	0	0	0	1	1	0	0	0	0	0	0	0	2	2	2	2	2	1	2	2	1	2	1	1	1	1	2	1	1	1	1	1	1	1
26269	女	1	0	0	0	0	0	0	0	0	0	0	0	0	0	1	0	0	0	0	1	0	0	1	0	0	0	1	1	2	2	1	1	2	2	2	1	1	1	1	1	2	1	1	1	2	1	1	2
26793	女	1	0	0	0	0	0	0	0	0	0	0	0	0	0	1	0	1	1	0	0	0	0	1	0	0	0	2	1	2	2	2	1	2	1	1	1	1	1	1	2	2	1	1	2	1	1	1	2
26240	女	0	0	0	0	1	0	0	0	0	0	0	0	0	0	1	0	0	0	0	0	1	0	1	0	0	0	2	2	2	1	1	1	1	1	1	1	1	4	4	1	1	1	3	1	1	1	1	3
24286	女	0	0	1	0	1	0	0	0	0	0	0	0	0	0	1	0	0	0	0	0	0	0	0	0	0	0	3	3	4	3	3	3	3	3	3	2	3	3	4	3	3	3	3	3	3	2	3	3
25843	女	0	0	0	0	0	0	0	0	0	0	0	0	0	0	0	0	0	0	0	0	0	0	1	0	0	1	1	1	2	1	1	1	1	2	2	1	1	3	3	1	2	2	3	2	2	1	1	1
26234	女	0	0	0	0	1	0	0	0	0	0	0	0	0	0	1	0	0	0	1	0	1	0	1	0	1	0	2	2	1	2	1	2	1	2	1	1	1	1	1	1	1	1	1	1	2	1	1	2
24430	女	0	0	0	0	0	0	0	0	0	0	0	0	0	0	1	1	0	0	1	0	0	0	0	0	1	1	2	3	2	1	1	1	1	1	1	1	1	1	1	1	1	2	2	2	1	1	1	2
26451	女	0	0	0	0	0	0	0	0	0	0	0	0	0	0	1	0	0	0	0	1	1	1	0	0	1	0	1	1	2	1	1	1	1	1	2	1	1	1	1	1	1	1	1	1	2	1	1	2
14662	女	0	0	0	0	1	0	0	0	0	0	0	0	0	0	1	1	1	1	1	1	1	0	1	1	1	0	4	4	3	3	2	3	3	3	4	3	4	4	4	3	3	3	4	2	3	3	3	3
26967	女	0	0	0	0	0	0	0	0	0	0	0	0	0	0	1	1	0	0	1	0	0	0	1	0	1	0	2	1	3	1	2	2	1	1	3	1	1	1	1	2	3	2	2	1	3	1	1	3
8409	女	0	1	0	0	0	0	0	0	0	0	0	0	0	0	1	1	1	1	1	1	1	1	1	1	1	1	2	2	3	3	3	2	3	3	3	2	5	4	4	3	4	4	4	3	3	3	3	4
26841	女	0	0	0	0	0	0	0	0	0	0	0	0	0	0	1	1	0	0	1	0	1	1	1	0	1	1	3	1	2	2	1	2	2	2	2	1	1	1	1	2	2	1	2	2	2	1	1	2
26797	女	0	0	0	0	0	0	0	0	0	0	0	0	0	0	0	0	1	0	0	1	1	0	0	0	0	0	1	1	1	1	1	1	1	1	1	1	1	1	1	1	1	1	1	1	1	1	1	1
26846	女	0	0	0	0	1	0	0	0	0	0	0	0	0	0	1	0	1	1	0	1	1	0	1	0	0	0	2	2	2	3	1	1	1	2	2	2	1	1	1	2	2	2	1	1	2	2	2	2
26909	女	0	0	0	0	0	0	0	0	0	0	0	0	0	0	1	0	0	0	0	0	0	0	0	0	0	0	2	3	2	3	1	1	1	2	1	1	1	1	2	2	2	2	1	1	2	1	2	2
26548	女	0	1	0	0	1	0	0	0	0	0	0	0	0	0	0	1	0	0	0	0	0	0	1	0	0	0	2	1	2	1	1	1	1	1	1	1	1	1	1	1	2	1	1	1	1	1	1	2
26828	女	0	0	0	0	0	0	0	0	0	0	0	0	0	0	1	1	1	1	1	1	1	0	0	1	1	0	3	2	3	2	1	1	2	2	3	1	1	3	5	5	3	1	3	3	3	1	2	4
26612	女	0	0	0	0	0	0	0	0	0	0	0	0	0	0	1	0	0	0	0	0	0	0	0	0	0	0	1	1	2	1	1	1	1	1	1	1	1	1	2	1	1	1	1	1	1	1	1	2
26115	女	0	0	0	0	0	0	0	0	0	0	0	0	0	1	1	1	1	1	0	1	1	0	0	0	1	0	2	1	1	2	1	2	1	1	1	1	1	1	1	1	1	1	1	1	1	1	1	1
25870	女	1	1	0	0	0	0	0	0	0	0	0	0	0	0	1	1	1	1	0	0	1	1	1	0	1	0	2	2	2	2	2	1	3	2	4	2	1	1	1	2	2	2	2	2	3	4	3	4
25973	女	0	0	0	0	0	0	0	0	0	0	0	0	0	0	0	0	1	0	0	0	0	0	1	0	0	0	3	3	3	3	2	1	1	3	3	2	2	3	1	3	3	3	1	2	1	1	1	3
26290	女	0	0	0	0	1	0	0	0	0	0	0	0	0	0	1	1	1	1	0	0	0	0	0	0	1	0	1	1	2	1	1	1	2	1	2	1	1	1	1	1	1	3	1	1	1	1	1	1
26219	女	0	0	0	0	1	0	0	0	0	0	0	0	0	0	1	0	0	1	0	0	0	0	0	0	1	0	1	1	1	2	1	1	1	1	1	1	1	1	1	1	1	3	1	1	1	1	1	1
26225	女	1	0	0	0	0	0	0	1	0	0	0	0	0	0	1	1	1	0	1	0	1	0	1	1	1	1	2	2	2	2	2	2	1	1	2	2	1	1	1	1	2	2	3	2	3	1	2	3
14955	女	0	0	0	0	0	0	0	0	0	0	0	0	0	0	1	1	1	1	0	1	1	0	1	1	1	1	2	2	3	3	3	2	2	2	3	3	3	3	4	4	4	4	4	2	1	2	4	4
3349	女	0	0	1	0	0	0	0	0	0	0	0	0	0	0	1	1	1	1	1	1	0	1	1	1	1	1	2	2	2	2	2	2	2	2	2	2	2	2	2	2	2	2	2	2	2	2	2	2
26585	男	1	0	0	0	0	0	0	0	0	0	0	0	0	0	1	1	0	0	0	1	0	0	0	0	1	1	1	1	3	1	2	2	1	4	1	1	1	1	1	1	1	1	1	1	1	1	1	2
25940	男	1	0	0	0	0	0	0	0	0	0	0	0	0	0	1	0	0	1	0	0	1	0	1	0	0	1	1	1	2	3	1	2	2	2	2	2	3	3	4	2	3	2	3	2	3	4	3	3
25497	男	1	0	0	0	1	0	0	0	0	0	0	0	0	0	1	1	0	1	0	0	0	0	0	0	0	0	2	1	3	3	2	1	5	4	3	1	1	1	4	3	3	3	4	2	3	2	2	3
26052	男	0	1	0	1	1	0	0	0	0	0	0	0	0	0	1	0	0	1	0	0	1	0	0	0	0	0	2	1	3	2	1	1	2	4	3	1	1	4	2	2	1	4	2	1	3	1	1	2
24434	男	1	0	0	0	0	0	0	0	1	0	0	0	0	0	1	1	1	1	1	0	1	1	0	1	1	1	3	2	4	2	2	3	2	3	4	2	1	1	1	2	1	2	2	2	2	1	1	4
26999	女	0	0	0	0	0	0	0	0	0	0	0	0	0	0	1	0	1	0	1	0	0	0	1	0	1	0	2	2	2	2	1	1	1	1	3	3	1	1	1	3	1	1	1	1	2	1	1	2
26454	女	0	0	0	0	0	0	0	0	0	0	0	0	0	0	1	1	0	1	0	0	0	1	0	0	1	1	2	2	2	2	1	1	1	1	2	1	1	1	2	1	1	2	1	1	1	1	1	2
26639	女	1	0	0	0	0	0	0	0	0	0	0	0	0	0	1	1	1	1	1	0	1	0	1	1	1	0	2	2	3	3	2	3	1	2	3	2	1	2	3	2	3	3	3	2	3	4	3	3
25892	女	1	0	0	0	0	0	0	0	0	0	0	0	0	0	1	0	1	0	0	1	1	0	1	1	1	0	2	2	2	2	1	1	1	1	1	2	1	1	1	1	2	1	1	1	2	1	1	3
25295	女	0	0	0	0	0	0	0	0	0	0	0	0	0	0	1	1	1	1	1	0	0	0	0	0	0	0	2	1	2	2	2	1	1	2	2	2	3	3	4	2	2	2	3	1	1	2	2	2
26787	女	1	0	0	0	0	0	0	0	0	0	0	0	0	0	0	0	0	0	0	0	0	0	1	0	0	1	2	2	2	2	3	1	2	1	1	1	1	1	1	1	2	1	1	2	3	3	2	2
26519	女	0	0	0	0	0	0	0	0	0	0	0	0	0	0	0	0	0	0	0	0	0	0	1	0	0	0	3	1	3	3	2	2	1	2	3	1	1	1	1	3	4	1	2	3	4	1	1	3
26395	女	1	0	0	0	0	0	0	0	0	0	0	0	0	0	0	0	0	0	0	0	0	0	0	0	0	0	1	1	1	1	1	1	1	2	1	1	1	1	2	1	1	1	1	1	1	1	1	1
26993	女	1	0	0	0	0	0	0	0	0	0	0	0	0	0	0	0	0	0	0	0	0	0	0	0	0	0	1	1	2	1	1	1	1	1	1	1	1	1	1	1	1	1	1	1	1	1	1	1
25974	女	0	0	0	0	0	0	0	0	0	0	0	0	0	0	0	1	1	1	0	0	0	1	1	0	1	0	2	1	2	3	1	1	2	1	1	1	1	1	1	1	1	1	1	1	1	1	1	1
25926	女	1	0	0	0	0	0	0	0	0	0	0	0	0	0	1	0	1	1	1	1	1	0	1	1	1	1	4	4	3	4	3	2	2	3	3	4	1	1	1	2	3	1	3	1	3	1	1	3
25905	女	1	0	0	0	0	0	0	0	0	0	0	0	0	0	0	0	1	0	0	0	0	0	1	0	0	0	2	2	3	2	2	2	1	1	3	2	1	1	2	3	2	1	3	1	2	1	1	2
26595	女	0	0	0	0	0	0	0	0	0	0	0	0	0	0	0	0	0	0	0	1	0	0	1	0	0	0	1	1	3	1	1	1	1	1	1	1	1	1	2	1	1	1	1	1	1	1	1	3
25466	女	0	0	0	0	0	0	0	0	0	0	0	0	0	0	0	0	0	0	0	0	0	0	0	0	0	0	2	1	3	3	3	2	3	4	3	3	3	3	3	2	3	3	3	3	3	3	2	4
26647	女	1	0	0	0	0	0	0	0	0	0	0	0	0	0	0	0	0	0	0	0	1	1	1	0	0	0	2	1	2	1	1	1	1	3	2	2	3	2	2	2	2	1	1	1	2	2	1	2
26992	女	0	0	0	0	0	0	0	0	0	0	0	0	0	0	0	0	0	0	0	0	0	0	1	0	0	0	2	1	1	1	2	2	1	1	2	1	1	1	1	1	1	1	1	1	1	1	1	1
26110	女	0	0	0	0	0	0	0	0	0	0	0	0	0	0	0	0	0	0	0	0	0	0	0	0	0	0	3	2	2	3	2	3	1	2	2	2	2	2	2	1	3	3	1	2	1	1	1	2
26767	女	0	0	0	0	0	0	0	0	0	0	0	0	0	0	1	0	0	0	0	0	0	0	0	0	0	0	2	1	2	2	1	1	1	1	1	1	1	1	1	1	2	1	1	1	1	1	1	2
26708	女	0	0	0	0	0	0	0	0	0	0	0	0	0	0	0	0	0	0	0	0	0	0	1	0	0	0	2	1	2	1	1	1	1	1	1	1	1	1	1	1	1	1	1	1	1	1	1	1
26641	女	1	0	0	0	0	0	0	0	0	0	0	0	0	0	1	0	0	0	0	0	0	0	0	0	0	0	2	1	3	2	1	1	1	2	2	1	1	2	3	3	3	2	2	2	2	1	1	2
26032	女	0	0	0	0	0	0	0	0	0	0	0	0	0	0	1	1	0	0	0	0	1	0	1	1	1	1	2	2	2	2	3	2	2	3	3	2	1	2	1	1	2	3	2	2	1	1	1	2
25397	女	0	0	0	0	1	0	0	0	0	0	0	0	0	0	1	0	0	1	0	0	0	0	0	0	0	0	1	1	2	2	1	2	1	2	2	1	1	1	1	2	2	2	1	1	2	1	1	2
26667	女	0	0	0	0	0	0	0	0	0	0	0	0	0	0	0	0	0	0	0	0	0	0	0	0	0	0	2	2	2	1	2	1	1	2	1	1	2	3	3	3	2	1	2	2	1	2	1	2
25967	女	0	0	0	0	0	0	0	0	0	0	0	0	0	0	1	0	0	0	1	0	0	0	0	0	0	0	1	1	1	1	1	1	1	1	1	1	1	1	1	1	1	1	1	1	1	1	1	1
26990	女	1	0	0	0	0	0	0	0	0	0	0	0	0	0	0	0	0	0	0	0	0	0	0	0	0	0	1	2	2	1	1	1	1	1	1	1	1	1	2	1	2	1	1	1	1	1	1	2
25477	女	0	0	0	0	0	0	0	0	0	0	0	0	0	0	1	1	0	1	1	0	1	1	1	0	1	1	2	3	1	2	1	2	3	2	2	2	1	4	4	2	2	2	4	1	2	2	2	3
25654	女	1	0	0	0	0	0	0	0	0	0	0	0	0	0	1	1	0	1	1	1	0	0	1	0	1	0	3	3	3	3	3	3	3	1	3	1	1	3	3	3	3	3	1	1	3	3	3	4
26336	女	0	0	0	0	0	0	0	0	0	0	0	0	0	0	1	0	0	0	0	0	0	0	0	0	0	0	2	2	3	3	1	2	1	1	2	1	1	1	1	1	1	1	1	1	1	1	1	3
25480	女	1	0	0	0	0	0	0	0	0	0	0	0	0	0	1	0	0	0	0	0	0	0	0	0	0	0	1	2	2	2	2	1	1	1	2	1	1	1	1	1	2	2	1	1	2	1	2	3
26588	女	0	0	0	0	1	0	0	0	0	0	0	0	0	0	0	0	0	1	0	0	0	0	0	0	0	0	2	1	1	2	1	1	1	2	1	1	1	1	1	1	1	3	1	1	1	1	1	1
26498	女	0	0	0	0	1	0	0	0	0	0	0	0	0	0	1	1	1	0	0	0	0	0	1	0	0	0	2	1	2	1	1	1	1	1	2	1	1	1	1	1	1	2	1	1	1	1	1	2
26977	女	0	0	0	0	0	0	0	0	0	0	0	0	0	0	1	1	1	1	0	0	0	0	1	1	0	0	2	4	2	2	1	3	1	1	2	1	1	1	2	2	2	1	1	1	2	2	1	3
26243	女	1	1	0	0	1	0	0	0	0	0	0	0	0	0	0	0	0	1	0	0	0	0	1	0	0	0	2	1	1	1	1	1	1	1	1	1	1	2	2	1	1	1	1	1	1	1	1	2
26499	女	0	0	0	0	1	0	0	0	0	0	0	0	0	0	1	0	1	1	1	1	1	1	1	0	0	1	4	2	2	3	3	2	3	1	4	3	1	3	3	4	5	4	4	3	4	4	3	4
26972	女	1	0	0	0	0	0	0	0	0	0	0	0	0	0	1	1	0	0	0	1	0	1	1	0	0	0	2	1	3	2	1	1	1	1	2	1	1	2	2	1	2	1	1	1	1	1	1	2
26458	女	0	0	0	0	0	0	0	0	0	0	0	0	0	0	1	0	0	1	1	0	0	1	0	0	0	0	3	3	3	4	1	1	1	2	1	1	1	1	2	1	2	1	1	1	1	1	1	1
5560	女	1	0	0	0	0	0	0	0	0	0	0	0	0	0	1	0	0	1	0	1	1	1	1	1	0	0	3	4	3	3	3	2	3	4	3	3	4	4	3	2	3	2	3	1	3	3	3	3
25410	女	0	0	0	0	0	0	0	0	0	0	0	0	0	0	0	0	0	1	1	0	0	1	1	0	0	1	2	2	3	3	2	2	3	3	3	3	3	2	3	2	2	2	2	3	3	3	3	3
26654	女	0	0	0	1	0	1	0	0	0	0	0	0	0	0	1	1	1	1	1	1	1	1	1	1	0	0	2	3	2	2	2	2	1	3	3	1	1	1	1	1	2	2	3	1	1	1	1	2
26954	男	1	0	0	0	0	0	0	0	0	0	0	0	0	0	0	0	0	0	0	0	0	0	0	0	0	0	2	2	2	2	1	2	1	2	2	1	1	2	4	2	2	2	2	2	2	2	2	2
26717	男	1	0	0	0	0	0	0	0	0	0	0	0	0	0	1	1	1	0	1	1	1	1	1	1	1	1	3	2	3	3	2	3	1	1	3	1	1	1	1	1	2	1	1	2	2	2	2	4
26501	男	0	0	0	0	0	0	0	0	0	0	0	0	0	0	0	0	0	0	0	0	0	0	0	1	0	0	2	1	1	1	1	1	1	1	2	1	1	1	1	1	1	1	1	1	1	1	1	1
26586	男	0	0	0	0	0	0	0	0	0	0	0	0	0	0	1	0	0	0	0	0	0	0	1	0	0	0	1	1	3	1	2	1	1	3	3	1	1	1	2	1	2	2	1	2	2	1	1	2
5567	男	0	0	0	0	1	1	0	0	0	1	0	0	0	0	1	1	1	1	0	0	0	0	0	0	0	0	2	2	4	2	2	3	4	4	4	3	3	4	4	4	3	4	4	3	3	3	4	4
26160	男	1	1	0	1	0	0	0	0	1	1	0	0	0	0	0	0	0	0	0	0	0	0	0	0	0	0	2	1	3	2	1	1	1	1	2	1	1	2	3	2	2	2	2	1	2	1	1	1
26063	女	1	0	0	0	0	0	0	0	0	0	0	0	0	0	1	0	0	1	1	0	0	0	0	0	0	0	2	2	3	4	1	1	2	1	2	1	1	1	1	1	2	2	4	2	3	5	5	3
27053	女	1	0	0	0	1	0	0	0	0	0	0	0	0	0	0	0	0	0	0	0	0	0	0	0	0	0	1	1	1	1	1	1	1	1	1	1	1	1	1	1	1	1	1	1	1	1	1	1
26416	女	0	0	0	0	0	0	0	0	0	0	0	0	0	0	1	0	0	1	0	0	0	0	0	0	0	0	2	2	1	1	1	1	1	2	2	2	1	1	1	1	2	1	2	1	1	1	1	1
26272	女	1	0	0	0	0	0	0	0	0	0	0	0	0	0	1	1	1	1	0	0	1	1	1	1	1	1	3	3	4	2	2	2	2	2	4	3	1	1	1	1	2	1	1	2	2	1	1	3
15019	女	0	1	0	1	1	0	0	0	0	0	0	0	0	0	1	1	0	1	1	0	1	0	0	0	0	0	2	2	3	2	1	2	2	2	2	2	1	2	3	2	2	2	2	2	2	2	2	2
26630	男	1	0	0	0	0	0	0	0	0	0	0	0	0	0	1	1	0	1	1	1	1	1	1	1	1	1	2	2	2	2	3	1	1	2	2	2	1	1	1	2	2	2	1	1	2	1	1	1
26486	女	0	0	0	0	0	0	0	0	0	0	0	0	0	0	0	0	0	0	0	0	1	0	1	0	0	1	1	1	2	2	1	1	1	1	1	1	1	1	1	2	2	1	1	1	2	1	1	1
26516	女	0	0	0	0	0	0	0	0	0	0	0	0	0	0	0	0	0	0	0	0	0	0	1	0	0	0	1	1	1	1	1	1	1	1	1	1	1	1	1	1	1	1	1	1	1	1	1	1
26631	女	1	0	0	0	0	0	0	0	0	0	0	0	0	0	1	0	1	1	1	0	0	1	1	0	1	0	2	2	2	3	2	3	1	1	3	1	1	1	1	1	3	2	1	2	1	1	1	3
26523	女	0	0	0	0	0	0	0	0	0	0	0	0	0	0	1	0	0	0	0	0	0	0	0	0	0	0	2	1	1	1	1	1	1	1	2	1	1	1	1	1	2	1	1	1	1	1	1	2
26982	女	0	0	0	0	0	0	0	0	0	0	0	0	0	0	0	0	1	1	0	0	0	0	0	0	1	0	1	1	1	1	1	1	3	1	2	1	1	1	1	1	1	2	1	1	1	1	1	1
27240	女	0	0	1	0	1	0	0	0	0	0	0	0	0	0	0	1	0	1	0	1	1	0	1	0	0	0	3	3	3	3	2	2	1	2	4	1	1	1	4	2	2	4	1	1	1	1	1	4
26624	女	0	0	0	0	1	0	0	0	0	0	0	0	0	0	1	1	1	0	1	1	1	0	1	1	1	1	3	3	3	3	2	2	1	1	2	1	1	1	1	2	4	4	2	2	4	4	4	3
26760	女	0	0	0	0	1	0	0	0	0	0	0	0	0	0	1	1	1	1	0	0	0	0	0	0	0	0	3	2	4	1	2	2	1	1	4	2	1	2	5	1	1	1	3	2	3	2	3	4
26971	女	0	0	0	0	0	0	0	0	0	0	0	0	0	0	1	1	0	1	1	0	1	1	0	0	1	0	1	1	2	2	1	1	1	1	1	1	1	1	1	1	1	1	1	2	2	3	1	2
26453	女	0	0	0	0	0	0	0	0	0	0	0	0	0	0	0	0	0	0	0	0	0	0	1	0	0	0	4	1	1	2	2	1	1	1	2	1	1	1	1	1	1	1	1	1	1	1	1	1
26282	女	0	0	0	0	1	0	0	0	0	0	0	0	1	0	1	1	1	0	1	1	1	0	1	1	1	0	2	2	2	2	2	2	1	1	2	2	1	2	2	1	2	2	2	2	2	1	2	2
26427	女	0	0	0	0	0	0	0	0	0	0	0	0	0	0	0	0	0	0	1	0	0	0	0	0	0	0	2	1	1	1	1	1	1	1	2	1	1	1	1	1	1	1	1	1	1	1	1	1
26764	女	0	1	0	0	0	0	0	0	0	0	0	0	0	0	1	1	0	1	1	1	1	1	1	1	0	0	2	2	2	2	2	1	1	2	2	2	1	1	2	2	2	2	2	2	2	2	2	2
26660	女	0	0	0	0	0	0	0	0	0	0	1	0	0	0	0	0	0	0	0	1	1	0	0	0	0	0	1	1	2	1	2	1	1	2	2	1	1	1	1	1	1	1	1	2	2	2	2	2
26137	女	0	0	0	0	1	0	0	0	0	0	0	0	0	0	0	0	0	0	0	0	0	0	0	0	0	0	1	1	1	1	1	1	1	1	1	1	2	1	2	1	1	1	1	1	1	1	1	1
26769	女	1	0	0	0	0	0	0	0	0	0	0	0	0	0	0	0	0	0	0	0	0	0	0	0	0	0	2	1	2	1	2	2	2	3	3	1	1	1	1	2	1	1	1	2	1	1	1	1
26743	女	0	0	0	0	0	0	0	0	0	0	0	0	0	0	1	1	0	1	0	1	0	0	0	0	0	0	2	1	1	2	2	1	1	1	2	2	1	1	3	2	3	2	2	1	1	1	1	2
26949	女	0	0	0	0	0	0	0	0	0	0	0	0	0	0	1	0	0	1	0	1	0	0	1	0	1	0	2	2	3	2	2	2	1	2	2	1	1	1	1	2	2	1	1	2	1	1	1	2
26522	女	0	1	0	0	0	0	0	0	0	0	0	0	0	0	1	0	0	0	0	1	1	0	1	0	1	1	2	1	2	2	1	1	1	1	2	1	1	1	1	2	2	1	1	1	2	2	2	2
26566	女	0	0	0	0	0	0	0	0	0	0	1	0	1	0	1	0	0	0	0	0	0	0	0	0	1	0	2	2	3	2	1	1	1	1	2	2	3	3	3	2	2	3	3	2	3	3	3	3
26040	女	0	0	0	0	0	0	0	0	0	0	0	0	0	0	1	0	1	0	0	0	0	0	1	0	0	0	2	2	3	2	1	1	1	1	3	1	1	1	1	1	1	1	1	1	1	1	1	3
26766	女	0	0	0	0	0	0	0	0	0	0	0	0	0	0	1	0	0	0	0	0	0	0	1	0	0	1	2	1	2	1	1	1	1	1	1	1	1	1	1	1	1	1	1	1	1	1	1	2
26671	女	0	0	0	0	0	0	0	0	0	0	0	0	0	0	1	0	0	0	0	0	0	0	1	0	0	0	2	1	3	1	1	1	1	1	3	1	1	1	1	1	2	1	1	1	1	1	1	3
27010	女	0	0	0	0	1	0	0	0	0	0	0	0	0	0	0	0	0	0	0	0	0	0	0	0	0	0	1	1	3	1	1	1	1	1	1	1	1	1	1	1	1	2	1	2	1	1	1	1
26428	女	0	0	0	0	0	0	0	0	0	0	0	0	0	0	0	0	1	1	0	0	1	1	1	0	0	0	1	1	3	3	2	1	1	1	3	1	1	1	4	2	2	2	3	2	2	1	1	3
26563	女	0	0	0	0	0	0	0	0	0	0	0	0	0	0	0	0	0	1	0	0	1	0	1	0	1	1	2	2	2	2	1	1	1	2	2	1	1	1	1	1	2	1	1	1	1	1	1	2
26755	女	0	0	0	0	0	0	0	0	0	0	0	0	0	0	1	0	0	1	1	0	0	0	0	0	1	1	2	2	2	2	2	1	1	1	2	2	1	2	3	2	2	1	1	1	2	2	1	3
26625	女	0	0	0	0	1	0	0	0	0	0	0	0	0	0	1	0	0	0	0	0	0	0	0	0	0	0	1	1	2	2	2	1	1	1	2	1	1	1	2	1	1	2	2	1	1	1	1	2
4631	女	0	0	0	0	1	1	0	0	0	0	0	0	0	1	1	1	0	0	0	0	1	1	1	1	1	0	1	1	1	1	1	1	1	1	2	1	1	1	1	1	1	2	2	1	1	1	1	1
3281	男	1	0	0	0	0	0	0	0	1	1	0	1	0	0	1	1	1	1	1	1	1	1	1	1	1	1	1	1	1	1	1	3	4	1	2	1	1	1	1	1	1	1	1	1	1	1	1	1
26918	男	1	0	0	0	0	0	0	0	0	0	0	0	0	0	1	0	0	1	0	0	0	0	0	0	1	0	3	3	2	2	2	1	1	1	2	2	1	1	2	2	2	1	1	1	2	2	1	2
8116	男	1	0	0	0	0	0	0	0	0	0	0	0	0	0	1	1	1	1	1	1	1	1	1	1	1	1	2	3	3	3	3	3	4	4	4	3	1	1	1	1	1	3	3	1	5	2	2	3
26559	男	0	0	0	0	0	0	0	0	0	0	0	0	0	0	1	0	1	1	0	0	0	0	1	0	0	0	2	1	2	2	1	2	1	2	2	1	1	1	1	1	2	1	1	1	1	1	1	2
25702	女	0	0	0	0	0	0	0	0	0	0	0	0	0	0	1	0	1	1	0	0	0	1	0	0	1	1	2	3	3	2	2	1	1	2	3	2	1	3	3	3	3	3	3	2	2	2	2	4
27319	女	0	0	0	0	1	0	0	0	0	0	0	0	0	0	1	1	0	1	0	1	0	0	0	0	0	0	1	1	2	2	1	2	1	1	2	1	1	1	1	1	1	2	1	1	1	1	1	2
27111	女	0	0	0	0	0	0	0	0	0	0	0	0	0	0	1	0	0	0	0	0	0	0	1	0	0	0	2	1	2	2	1	1	1	1	2	1	1	1	1	1	1	1	1	2	2	3	2	2
27143	女	0	0	0	0	0	0	0	0	0	0	0	0	0	0	1	1	1	1	1	1	1	1	1	1	1	1	2	3	3	3	2	2	1	1	1	1	1	1	1	2	2	3	3	3	3	3	2	3
26388	女	1	0	0	0	0	0	0	0	0	0	0	0	0	0	0	0	1	1	1	1	1	0	0	1	1	0	2	4	2	2	2	2	2	2	2	2	2	2	2	2	3	2	2	2	2	2	2	2
27360	女	1	0	0	0	0	0	0	0	0	0	0	0	0	1	1	0	1	1	0	0	1	1	0	0	1	0	2	2	2	3	2	1	1	1	2	1	1	1	3	1	2	1	2	3	3	1	1	4
27130	女	1	0	0	0	0	0	0	0	0	0	0	0	0	0	1	1	0	0	1	0	1	0	1	1	1	0	1	1	1	1	1	1	1	1	1	1	1	1	1	1	1	1	1	1	1	1	1	1
27086	女	1	0	0	0	0	0	0	0	0	0	1	0	0	0	1	1	0	1	0	1	0	0	0	0	0	0	3	3	3	3	1	1	2	1	3	2	1	1	1	1	2	1	1	1	2	1	1	2
27066	女	1	0	0	0	0	0	0	0	0	0	0	0	0	0	1	1	1	1	1	0	1	1	1	1	1	1	2	2	2	2	3	2	1	1	2	1	1	2	1	2	3	2	2	2	2	1	1	2
27340	女	0	0	0	0	0	0	0	0	0	0	0	0	0	0	0	0	0	0	0	0	0	0	0	0	0	0	1	1	2	2	1	1	2	1	1	1	1	1	1	2	1	1	1	1	1	1	1	1
9663	女	0	0	0	0	1	0	0	0	0	0	1	0	0	0	0	0	0	0	1	0	0	0	1	0	1	1	3	3	2	3	1	3	1	2	4	2	1	1	2	1	2	2	1	2	4	4	2	3
5259	女	0	0	0	0	0	0	0	0	0	0	0	0	0	0	1	0	1	1	1	1	1	1	1	1	1	1	2	2	2	3	3	2	2	2	3	2	1	2	2	2	3	2	2	2	3	3	2	3
29292	女	0	0	0	0	0	0	0	0	0	0	0	0	0	0	1	0	0	0	0	0	0	0	1	0	0	0	2	1	3	1	1	1	1	1	2	1	1	1	1	2	3	1	2	2	1	1	1	4
27024	女	0	0	0	0	0	0	0	0	0	0	0	0	0	0	1	1	0	0	0	0	0	0	1	0	0	1	1	2	3	3	1	3	1	4	4	2	1	3	1	3	3	1	1	1	3	1	1	3
26827	女	0	0	0	0	1	0	0	0	0	0	0	0	0	0	1	1	0	0	0	1	0	0	0	0	0	0	2	1	2	1	2	1	1	1	2	2	1	2	2	2	2	2	2	1	2	1	1	2
5581	女	0	0	0	0	0	0	0	1	0	0	0	1	0	1	1	0	0	1	0	0	1	0	1	1	0	0	2	1	2	2	1	1	3	1	3	1	3	1	1	1	1	1	4	2	1	1	1	2
14723	女	1	0	0	0	0	0	0	0	0	0	0	0	0	0	1	1	0	0	0	0	0	0	0	0	0	0	1	1	1	1	1	1	1	1	1	1	1	1	1	1	1	1	1	1	1	1	1	1
27391	女	1	0	0	0	0	0	0	0	0	0	1	0	0	0	0	0	0	1	0	0	0	0	1	0	0	0	1	1	1	1	1	1	1	1	1	1	1	1	1	1	1	1	1	1	1	1	1	1
27374	女	1	0	0	0	0	0	0	0	0	0	0	0	0	0	1	0	0	0	0	0	0	0	0	0	0	1	2	1	2	2	1	1	1	1	2	1	1	1	1	1	1	1	1	1	1	1	1	1
26986	女	1	0	0	0	1	0	0	0	0	0	0	0	0	0	1	1	1	1	0	1	0	0	0	0	1	1	2	3	3	2	2	2	2	2	3	2	4	3	3	3	3	2	4	3	4	3	3	3
26479	女	0	0	0	0	0	0	0	0	0	0	0	0	0	0	0	0	1	1	0	0	0	0	0	0	0	0	2	3	2	2	2	1	1	1	1	1	1	1	2	2	2	2	1	1	1	1	1	2
26413	女	0	0	0	0	0	0	0	0	0	0	0	0	0	0	0	0	0	0	0	0	0	0	0	0	0	0	1	1	2	2	1	1	2	1	2	1	1	1	2	1	1	1	1	1	1	1	1	2
27175	女	0	1	0	1	1	0	0	0	0	0	0	0	0	0	1	1	0	1	1	1	0	0	1	1	0	0	2	2	2	2	2	2	1	1	2	2	1	2	1	2	2	2	2	1	2	2	2	2
27355	女	0	0	0	0	0	0	0	0	0	0	0	0	0	0	1	0	0	1	1	1	0	0	1	0	1	0	2	1	2	1	1	2	2	2	2	1	1	1	1	1	1	1	1	1	1	1	1	1
27160	女	0	0	0	0	0	0	0	0	0	0	0	0	0	0	1	0	0	0	1	0	1	0	1	0	1	1	3	1	3	2	1	1	1	1	2	1	1	1	3	2	2	1	1	1	1	1	1	1
27100	女	0	0	0	0	0	0	0	0	0	0	0	0	0	0	0	0	0	0	0	0	1	0	1	0	0	0	2	1	2	2	2	2	2	2	2	2	2	2	1	2	2	2	2	1	1	2	2	2
26659	女	0	0	0	0	0	0	0	0	0	0	0	0	0	0	1	0	1	0	0	0	1	0	0	0	0	0	2	1	3	3	1	1	1	1	2	1	1	2	3	2	2	1	2	1	2	1	1	1
27345	女	0	0	1	0	0	0	0	0	0	0	0	0	0	0	1	0	0	1	0	0	0	0	0	0	0	0	2	1	3	2	1	1	1	1	1	1	1	1	2	2	2	1	2	1	3	1	1	2
26621	女	0	0	0	0	0	0	0	0	0	0	0	0	0	0	1	1	0	1	1	1	1	1	1	1	1	1	3	4	2	3	2	4	3	3	4	3	4	4	5	4	4	3	4	2	3	2	4	3
26567	女	0	0	0	0	0	0	0	0	0	0	0	0	0	0	1	0	0	0	0	1	1	1	1	0	0	0	3	3	3	3	2	2	2	2	2	2	2	3	5	2	2	2	2	2	2	2	2	2
27023	女	0	0	0	0	0	0	0	0	0	0	1	0	0	0	1	0	1	1	0	0	0	0	0	0	0	0	2	2	2	2	2	2	1	2	2	1	1	1	1	3	1	2	3	1	3	2	3	3
27365	女	1	0	0	0	0	0	0	0	0	0	0	0	0	0	1	0	0	1	0	1	0	0	1	0	0	0	1	1	1	1	1	1	1	1	2	1	1	1	1	1	2	2	1	1	1	1	1	1
27359	女	0	0	0	0	1	0	0	0	0	0	0	0	0	0	0	0	1	0	1	0	0	0	1	1	0	0	1	1	2	1	3	1	1	1	1	1	1	1	1	1	1	3	1	1	1	1	1	2
26390	女	0	0	0	0	1	0	0	0	0	0	0	0	0	0	1	1	0	0	0	0	0	0	1	0	0	0	1	1	2	2	1	1	1	1	2	1	1	1	1	2	1	3	1	1	1	1	1	3
26698	女	0	0	0	0	1	0	0	0	0	0	0	0	0	0	0	0	0	0	0	0	0	0	0	0	0	0	1	1	1	1	1	1	1	1	1	1	1	1	1	1	1	1	1	1	1	1	1	1
27093	女	0	0	0	0	0	0	0	0	0	0	0	0	0	0	1	0	0	1	0	0	0	0	0	0	1	0	3	3	3	3	3	1	1	3	3	2	1	2	1	2	1	2	1	4	4	4	4	4
5929	女	0	1	0	0	0	0	0	1	0	0	0	0	0	0	1	1	1	1	1	1	1	1	1	1	1	1	3	1	2	3	2	2	2	2	2	2	1	3	3	2	2	2	3	1	3	2	3	3
26927	女	0	0	0	0	0	0	0	0	0	0	0	0	0	0	1	0	0	0	0	0	0	0	1	0	0	0	1	1	2	1	1	1	1	1	1	1	1	1	1	1	1	1	1	1	1	1	1	1
27335	女	0	0	0	0	0	0	0	0	0	0	0	0	0	0	1	1	0	1	0	0	0	0	1	0	0	0	2	1	2	1	1	1	1	1	2	1	1	1	1	1	1	1	2	1	1	1	1	2
26715	女	0	1	1	0	0	0	0	0	0	0	0	0	0	0	0	0	0	0	0	0	1	0	1	0	0	0	3	4	2	3	2	1	2	2	2	1	1	1	1	2	3	3	2	2	3	1	1	3
14961	女	0	0	0	0	1	0	0	0	0	0	0	0	1	0	1	1	1	1	1	1	1	1	0	1	1	1	2	2	2	2	2	2	2	2	2	2	2	2	1	2	3	2	5	3	2	2	2	2
26869	女	0	0	0	0	0	0	0	0	0	0	0	0	0	0	0	0	0	0	0	0	0	0	0	0	0	0	2	1	3	2	2	1	1	2	2	1	1	1	1	2	2	1	1	2	1	1	1	3
27350	男	1	0	0	0	0	0	0	0	0	0	0	0	0	0	0	0	0	0	0	0	0	0	0	0	0	0	1	1	2	2	1	1	1	1	2	1	1	1	1	1	2	1	1	1	1	1	1	1
27389	男	0	0	0	0	0	0	0	0	0	0	0	0	0	0	1	0	1	0	0	0	0	0	0	0	0	0	2	2	2	2	2	2	2	2	2	2	1	1	1	2	2	2	2	1	2	2	2	2
4694	男	1	0	0	0	0	0	0	0	0	0	0	0	0	1	0	1	0	0	1	1	0	0	0	0	1	0	2	1	2	5	1	2	2	1	3	2	1	3	1	1	1	2	2	1	1	1	1	2
26104	男	1	0	0	0	0	0	0	0	0	0	0	0	0	0	0	0	0	0	0	0	0	0	1	0	0	0	2	1	2	1	1	1	1	2	1	1	1	1	1	2	2	1	1	1	1	1	1	1
26504	女	0	0	0	0	0	0	0	0	0	0	0	0	0	0	1	0	1	0	0	0	0	0	0	0	0	0	2	1	2	1	2	1	1	1	2	1	1	1	1	1	1	2	2	1	1	1	1	1
26727	女	0	0	0	0	0	0	0	0	0	0	0	0	0	0	0	0	0	0	0	0	0	1	0	0	0	0	1	1	3	2	2	1	1	1	1	1	1	1	1	1	1	1	1	2	3	1	3	4
25422	女	1	0	0	0	0	0	0	0	0	0	0	0	0	0	1	0	0	1	0	0	1	0	1	0	1	0	2	1	2	2	1	1	1	1	2	1	1	1	1	1	1	1	1	1	2	1	1	2
6057	女	0	0	0	0	0	0	0	0	0	0	0	0	0	1	1	1	1	1	1	1	1	0	1	1	0	0	3	3	4	4	3	3	4	4	4	3	1	3	4	3	4	4	1	3	5	1	2	4
26676	女	1	1	1	0	0	0	0	0	0	0	0	0	0	0	1	1	1	1	0	0	0	0	0	0	1	0	2	2	4	3	1	1	2	2	3	1	1	1	1	2	1	2	3	1	1	1	1	3
26442	女	0	0	0	0	0	0	0	0	0	0	0	0	0	0	0	0	0	0	0	0	0	0	0	0	0	0	3	2	2	2	2	2	1	3	3	1	1	2	1	1	2	1	1	1	1	1	1	1
28694	女	0	0	0	0	0	0	0	0	0	0	0	0	0	0	1	0	0	1	0	0	0	0	0	0	1	0	1	1	1	1	1	1	1	1	2	1	1	1	1	1	1	1	1	1	1	1	1	2
26010	女	1	0	0	0	1	0	0	0	0	0	0	0	0	0	1	0	0	1	1	0	0	1	1	0	1	0	3	3	3	3	2	2	3	3	2	1	1	1	1	1	2	2	1	2	1	1	1	1
26965	女	1	0	0	0	0	0	0	0	0	0	0	0	0	0	0	0	0	0	0	0	0	0	0	0	0	0	1	1	1	1	1	1	1	1	1	1	1	1	1	1	1	1	1	1	1	1	1	1
6323	女	0	0	0	0	1	0	0	0	0	0	0	0	0	0	1	1	1	1	1	1	1	1	1	1	1	0	3	3	3	3	2	2	3	3	2	1	1	1	1	2	3	3	2	2	3	4	2	2
26375	女	0	1	0	0	0	0	0	0	0	0	0	0	0	0	0	0	0	0	0	0	0	0	1	1	0	0	1	1	2	1	1	1	1	1	1	1	1	1	1	2	1	1	1	1	1	1	1	1
25812	女	0	0	0	0	0	0	0	0	0	0	0	0	0	0	1	0	0	1	0	1	0	0	0	0	0	0	2	3	3	2	3	1	1	4	3	1	1	1	1	1	3	2	3	3	1	1	1	1
26996	女	0	0	0	0	0	0	0	0	0	0	0	0	0	0	0	0	1	1	1	1	1	1	1	0	0	0	2	2	2	2	2	1	3	2	1	1	1	1	2	1	2	1	1	1	1	1	2	2
26155	女	0	0	0	0	0	0	0	0	0	0	0	0	0	1	1	1	1	1	1	1	1	0	1	0	1	0	2	1	3	3	2	2	1	1	3	1	1	1	3	1	2	1	1	1	1	1	1	3
26441	女	0	0	0	0	0	0	0	0	0	0	0	0	0	0	1	0	0	1	0	0	0	0	0	0	0	0	2	2	3	2	2	2	1	2	2	2	1	2	2	2	3	2	1	2	2	2	2	2
26114	女	1	1	0	0	0	1	0	0	0	0	0	0	0	0	1	1	1	1	1	1	0	0	1	1	1	0	2	2	2	2	2	2	1	2	2	1	1	1	1	1	2	2	1	3	2	1	1	1
26167	女	0	0	0	0	0	0	0	0	0	0	0	0	0	0	0	1	0	1	0	0	0	0	1	0	0	1	2	1	2	2	2	1	1	1	2	1	1	1	1	1	2	2	2	2	2	1	1	2
26174	女	0	0	0	0	0	1	0	0	0	0	0	0	0	0	0	1	0	0	0	0	0	0	0	0	0	0	4	3	2	2	2	2	1	1	1	1	1	1	1	1	1	1	1	1	1	1	1	3
26031	女	0	0	0	0	0	0	0	0	0	0	0	0	0	0	0	0	0	0	0	0	0	0	0	0	0	0	2	1	3	3	1	1	1	1	1	1	1	1	1	2	2	2	2	1	3	1	1	2
26180	女	0	0	0	0	0	0	0	0	0	0	0	0	0	0	1	0	0	0	0	0	0	0	1	0	0	0	1	1	2	2	1	1	2	1	3	1	1	1	1	1	3	3	3	3	1	1	1	2
26041	女	0	0	0	0	1	0	0	0	0	0	0	0	0	0	0	1	0	1	0	0	0	0	1	0	0	0	1	1	2	2	1	1	2	1	1	1	1	1	1	1	1	2	1	1	1	1	1	1
26108	女	0	0	0	0	0	0	0	0	0	0	0	0	0	0	0	0	0	0	0	1	0	0	1	0	0	0	1	1	2	1	2	1	1	1	2	1	1	1	1	2	1	1	2	1	1	1	1	2
26978	女	1	0	0	0	0	0	0	0	0	0	0	0	0	0	1	0	1	0	0	0	0	0	1	1	0	0	2	1	2	1	1	1	1	1	1	1	1	1	1	1	2	1	1	1	1	1	1	1
26465	女	1	0	1	0	1	0	0	1	0	0	0	0	0	0	1	0	0	1	0	1	0	0	1	0	0	0	1	1	2	2	1	2	1	1	2	1	1	1	1	2	3	2	1	2	2	1	1	3
26673	女	0	0	0	0	0	0	0	0	0	0	0	0	0	0	0	0	0	0	0	0	0	0	1	0	0	0	2	1	2	2	1	1	1	1	2	1	1	1	2	1	2	2	1	2	2	1	1	2
26352	女	0	0	0	0	0	0	0	0	0	0	0	0	0	0	1	0	0	1	0	0	0	0	0	0	0	0	3	3	3	3	2	2	2	3	3	3	2	3	3	2	3	3	3	2	3	2	3	3
26550	女	0	0	0	0	1	0	0	0	0	0	0	0	0	0	1	1	1	1	0	1	1	0	1	0	1	1	2	3	3	3	1	2	4	3	4	4	3	3	4	3	3	4	3	3	4	3	3	4
3970	女	0	0	0	0	0	0	0	0	0	0	0	0	1	0	1	1	1	1	1	1	1	1	1	1	1	1	3	3	3	3	3	2	1	2	2	2	2	2	3	4	4	4	5	2	3	3	3	3
26436	女	0	0	0	0	0	0	0	0	0	0	0	0	0	0	1	0	0	0	0	0	0	0	1	0	0	0	1	1	1	1	2	1	1	1	2	1	1	1	1	1	1	2	1	1	1	1	1	1
23666	女	0	0	0	0	1	0	0	0	0	0	0	0	0	0	1	1	0	1	1	1	1	0	1	1	1	1	3	2	4	3	3	3	4	3	2	2	3	3	3	4	4	3	3	3	4	5	5	5
25851	女	0	0	0	0	0	0	0	0	0	0	0	0	0	0	1	1	1	1	1	0	1	0	1	1	0	0	4	4	3	4	2	2	2	3	2	2	4	4	4	4	4	4	4	4	4	4	4	4
26083	女	0	0	0	0	1	0	0	0	0	0	0	0	0	0	1	0	0	0	0	0	0	0	1	0	0	0	1	1	2	1	2	1	1	1	2	1	1	1	1	1	1	2	1	1	1	1	1	1
25469	女	0	0	0	0	1	0	0	0	0	0	0	0	0	0	1	0	0	1	0	0	0	0	0	0	0	0	3	1	4	3	3	1	1	2	2	2	1	4	4	3	4	5	3	3	4	3	3	3
26776	女	0	0	0	0	0	0	0	0	0	0	0	0	0	0	0	0	0	0	0	0	0	0	1	0	0	0	1	1	2	2	1	1	1	1	1	1	1	1	1	1	1	1	1	1	1	1	1	1
14709	女	0	0	0	0	0	1	1	1	0	0	1	1	0	0	1	1	0	1	1	0	1	1	1	1	1	0	4	3	2	2	2	1	2	1	2	1	1	1	5	1	1	1	2	2	1	1	1	2
26445	女	0	0	0	0	1	0	0	0	0	0	0	0	0	0	1	1	1	1	0	0	0	0	1	0	0	0	1	2	1	1	1	1	1	2	2	1	1	1	1	1	2	3	1	1	1	2	2	2
25676	女	0	0	0	0	1	0	0	0	0	0	0	0	0	0	1	1	1	0	1	1	0	0	0	0	1	0	3	2	3	2	1	3	1	3	2	2	1	4	1	1	1	3	3	1	3	1	1	3
24607	女	0	1	0	0	1	0	0	0	0	0	0	0	0	0	1	0	1	1	1	1	1	0	0	0	0	0	1	1	3	1	1	1	1	3	1	1	1	1	1	1	1	1	1	1	1	1	1	2
25909	女	1	0	0	0	0	0	0	0	0	0	0	0	0	0	0	0	0	0	0	0	0	0	0	0	0	0	2	2	3	4	2	1	2	1	2	2	1	2	2	2	2	1	1	2	3	2	2	2
6503	女	0	1	1	0	1	0	0	1	0	0	0	0	0	0	1	0	0	1	1	1	1	0	1	0	1	1	3	3	3	2	2	3	3	3	3	1	2	3	3	2	2	3	2	2	1	2	3	3
4939	女	0	0	0	0	1	0	0	0	0	0	0	0	0	0	1	1	1	1	1	1	1	0	0	0	1	0	3	3	3	3	2	2	3	2	3	3	3	2	3	2	3	3	3	2	3	3	3	3
15589	女	1	0	0	0	0	0	0	0	0	0	0	0	0	1	1	1	0	1	0	1	1	1	1	0	1	1	3	3	3	3	2	3	3	2	3	3	1	2	1	1	3	3	1	2	1	1	1	2
25719	女	1	0	0	0	0	0	0	0	0	0	0	0	0	0	0	0	0	0	0	0	0	0	0	0	1	0	2	2	2	2	1	2	1	1	1	1	1	1	4	2	2	1	1	1	2	2	2	3
26057	女	0	0	0	0	1	0	0	0	0	0	0	0	0	0	0	0	0	0	0	0	0	0	1	0	0	0	1	1	1	1	1	1	1	1	1	1	1	1	1	1	1	1	1	1	1	1	1	1
26471	女	0	0	0	0	0	0	0	0	0	0	0	0	1	0	1	1	0	0	0	0	1	1	1	0	1	0	2	1	2	2	1	1	1	1	2	1	1	2	1	2	2	2	3	2	1	1	1	2
26721	女	0	0	0	0	0	0	0	0	0	0	0	0	0	0	1	0	0	0	0	0	1	0	1	0	0	0	1	1	2	2	2	2	1	2	2	1	1	1	2	1	2	2	2	1	1	1	2	2
26212	女	0	0	0	0	0	0	0	0	0	0	0	0	0	0	1	0	0	1	0	0	0	0	0	0	0	0	1	1	3	2	1	1	3	3	3	4	3	3	4	2	2	2	2	2	1	1	1	3
26658	女	0	0	0	0	0	0	0	0	0	1	0	0	0	0	0	0	0	0	0	0	0	0	0	0	0	0	1	1	2	1	1	1	1	1	1	1	1	1	1	1	1	1	1	1	1	1	1	2
25519	女	0	0	0	0	0	0	0	0	0	0	0	0	0	0	0	0	0	1	0	0	0	0	1	0	0	1	1	1	1	2	2	1	2	1	2	2	1	1	1	1	1	1	1	1	2	2	1	2
26462	女	0	0	0	0	0	0	0	0	0	0	0	0	0	0	1	0	0	0	0	0	0	0	0	0	0	0	2	2	1	3	2	2	1	2	2	2	3	3	4	2	3	3	4	2	3	3	3	3
26450	女	1	1	0	0	0	0	0	0	0	0	0	0	0	0	1	1	0	1	0	0	0	0	1	1	0	0	2	2	3	3	1	1	1	1	2	2	1	1	3	2	3	3	3	2	3	1	2	3
26418	女	0	0	0	0	1	0	0	0	0	0	0	0	0	0	1	0	0	0	1	0	0	1	1	1	0	0	2	2	2	3	3	1	1	2	3	2	1	1	1	2	3	3	1	2	1	1	1	3
10883	女	0	0	0	0	1	0	0	0	0	0	0	0	0	0	1	1	1	1	1	1	1	1	1	1	0	0	2	4	2	3	1	2	1	2	4	2	1	4	4	3	4	3	3	2	4	4	4	4
15259	女	1	0	0	0	0	0	0	0	0	0	0	0	0	0	1	1	1	1	1	1	1	1	0	0	0	0	2	2	2	2	2	2	2	2	2	1	2	1	4	3	3	3	3	1	4	4	3	4
26703	女	0	0	0	0	0	0	0	0	0	0	0	0	0	0	1	0	0	0	0	1	1	1	0	0	0	0	2	2	2	1	1	1	1	1	3	1	1	1	2	2	1	2	1	2	3	3	3	4
26373	女	0	0	0	0	1	0	0	0	0	0	0	0	0	0	1	1	1	1	0	0	0	0	0	0	0	0	2	2	3	2	2	1	1	2	4	2	1	2	3	2	2	3	2	3	3	5	4	4
26469	女	0	0	0	0	0	0	0	0	0	0	0	0	0	0	0	0	0	0	0	0	0	0	0	0	0	0	1	1	1	1	1	1	1	1	1	1	1	1	1	1	1	1	1	1	1	1	1	1
27173	女	0	0	0	0	0	0	0	0	0	0	0	0	0	0	0	0	0	0	0	0	0	0	0	0	0	0	1	1	2	1	1	1	1	1	2	1	1	1	1	1	1	1	1	1	1	1	1	2
26638	女	0	0	0	0	0	0	0	0	0	0	0	0	0	0	1	1	1	1	1	0	0	0	1	0	1	0	2	1	3	1	2	1	1	1	3	1	1	1	1	2	3	1	1	1	3	4	2	2
6760	女	0	0	0	0	0	0	0	0	0	0	0	0	0	0	1	1	0	1	0	1	1	0	1	0	1	0	4	4	4	4	3	3	3	3	3	3	3	3	3	3	4	3	3	3	3	1	3	4
27167	女	0	0	0	0	1	0	0	0	0	0	0	0	0	0	1	1	1	1	1	1	1	1	1	1	0	0	3	3	3	4	1	2	3	1	3	1	1	3	4	2	3	2	2	2	1	1	1	2
10245	女	0	0	0	0	0	0	0	0	0	0	0	0	0	0	1	1	0	1	1	1	1	1	1	1	1	1	2	1	2	3	3	2	1	2	3	1	1	1	1	3	2	3	3	2	1	1	2	3
10866	女	0	0	0	0	0	0	0	0	0	0	0	0	0	0	1	0	0	1	0	1	1	0	1	1	0	1	2	3	3	3	2	1	1	2	3	1	1	1	3	1	3	3	1	3	1	1	1	3
26707	女	0	0	0	0	0	0	0	0	0	0	0	0	0	0	1	0	0	1	0	0	0	0	0	0	0	0	2	1	4	2	2	1	1	1	2	1	1	1	1	3	2	2	2	2	1	1	1	2
6965	女	0	0	0	0	1	0	0	0	0	0	0	0	0	0	1	1	1	1	1	0	1	0	1	0	1	1	3	2	3	3	3	3	3	3	3	2	3	3	4	3	3	4	4	3	4	3	3	4
15252	女	0	0	0	0	1	0	0	0	0	0	0	0	0	0	1	1	1	1	1	0	1	0	1	1	1	1	4	4	4	4	3	2	2	2	3	3	1	4	5	2	2	2	3	2	2	3	1	2
26369	女	0	0	0	1	0	1	0	0	0	0	0	0	0	0	1	1	0	1	1	1	1	0	0	0	1	0	2	2	3	1	1	2	1	3	3	2	3	4	3	2	2	3	2	2	1	1	1	2
26742	女	0	0	0	0	0	0	0	0	0	0	0	0	0	0	1	1	1	1	1	1	1	1	1	1	1	1	3	3	3	3	2	3	2	2	3	3	1	4	5	4	2	1	1	4	1	1	1	4
26421	女	0	0	0	0	0	0	0	0	0	0	0	0	0	0	1	1	1	1	1	0	0	0	1	1	1	0	2	2	2	2	1	1	2	2	3	1	2	1	1	1	1	1	1	1	2	1	1	2
27151	女	0	0	1	0	0	0	0	0	0	0	0	0	0	0	1	0	0	0	0	1	0	0	1	1	0	0	2	1	2	3	1	1	1	1	2	3	1	1	3	3	3	3	4	2	3	1	1	3
26922	女	0	0	0	0	0	0	0	0	0	0	0	0	0	0	0	0	0	0	0	0	0	0	0	0	0	0	1	1	2	1	1	1	1	2	2	1	1	1	1	1	1	1	1	1	1	1	1	1
26984	女	0	0	0	0	0	0	0	0	0	0	0	0	0	0	1	1	1	1	1	1	1	0	1	0	0	0	2	3	3	3	2	2	1	2	3	2	1	1	3	2	2	2	1	2	3	4	4	4
27158	女	0	0	0	0	0	0	0	0	0	0	0	0	0	0	1	0	0	0	0	0	0	0	0	0	0	0	2	2	3	3	2	1	3	3	3	2	1	2	4	3	2	1	2	3	4	3	2	2
26609	女	0	0	0	0	0	0	0	0	0	0	0	1	0	1	1	1	1	1	1	1	1	1	1	1	1	1	2	2	2	2	1	1	1	1	2	1	1	1	1	1	2	1	1	3	2	1	1	3
27101	女	0	0	0	0	0	0	0	0	0	0	0	0	0	0	1	0	0	1	0	0	1	0	1	0	0	0	1	1	2	1	1	1	1	1	2	1	1	1	1	1	1	1	1	1	1	1	1	2
27099	女	0	0	0	0	0	0	0	0	0	0	0	0	0	0	1	0	1	1	0	0	1	0	1	0	0	0	1	1	2	2	1	1	2	2	2	2	1	1	1	1	1	1	2	1	1	1	1	1
5445	女	0	0	0	0	1	0	0	0	0	0	0	0	0	0	1	1	1	1	1	1	1	1	1	1	1	1	2	2	2	2	2	2	2	2	2	3	1	2	5	4	3	3	3	3	3	3	3	3
15154	女	0	0	0	0	0	0	0	1	0	0	0	1	0	0	1	1	1	1	1	1	1	0	1	1	1	1	5	3	5	5	3	2	1	1	3	3	1	1	1	1	3	2	5	1	1	1	1	1
27084	女	1	0	0	0	0	0	0	0	0	0	0	0	0	0	0	0	0	0	0	0	0	0	0	0	0	0	1	1	2	1	1	1	1	1	3	1	1	1	1	1	1	1	1	1	1	1	1	1
5462	女	0	1	0	0	0	0	0	0	0	0	0	0	0	0	1	1	1	0	1	0	1	1	1	0	0	0	2	3	3	3	3	2	1	3	3	2	1	3	4	1	4	2	3	3	3	1	1	3
26862	女	0	0	0	0	0	0	0	0	0	0	0	0	0	0	1	0	0	1	0	0	0	0	0	0	0	0	2	2	2	2	1	2	2	1	2	2	2	2	3	2	2	1	2	1	1	1	1	2
26744	女	0	0	0	0	0	0	0	0	0	0	0	0	0	0	0	0	0	0	0	0	0	0	0	0	0	0	1	1	2	1	1	1	1	1	2	1	1	1	1	1	1	1	1	1	1	1	1	2
26900	女	0	0	0	0	0	0	0	0	0	0	0	0	0	0	1	0	0	0	0	0	0	0	1	0	0	0	2	3	2	2	2	1	1	1	2	1	1	1	1	1	1	1	1	1	1	1	1	1
26604	女	1	0	0	0	0	0	0	0	0	0	0	0	0	0	0	0	0	0	0	1	0	0	0	0	0	0	1	1	1	1	1	1	1	1	1	1	1	1	1	1	1	1	1	1	1	1	1	1
27397	女	0	0	0	0	0	0	0	0	0	0	0	0	0	0	1	0	0	1	1	0	0	0	1	1	1	0	2	1	2	2	1	1	1	1	1	1	1	1	3	1	1	1	2	1	1	1	1	1
27070	女	1	0	0	0	0	0	0	0	0	0	0	0	0	0	1	0	1	1	0	1	0	0	1	0	1	0	2	1	2	2	2	1	1	1	3	2	1	2	1	1	2	2	2	1	1	1	1	2
26087	女	0	0	0	0	0	0	0	0	0	0	0	0	0	0	1	1	1	1	1	0	1	1	1	1	0	0	3	2	2	1	2	1	1	1	1	1	1	1	1	1	1	1	1	1	1	1	1	1
15135	女	0	0	0	0	0	0	0	0	0	0	0	0	0	0	1	1	1	1	1	0	1	1	1	1	1	1	2	2	2	2	1	2	3	4	3	2	3	4	5	2	2	2	3	2	2	2	2	2
27197	女	0	1	1	0	1	0	0	1	0	0	0	0	0	0	1	1	0	0	1	0	0	0	0	1	0	1	2	2	2	2	1	1	1	1	2	1	1	3	2	2	2	2	2	1	1	1	1	1
15014	女	0	0	0	0	0	0	0	0	0	0	0	0	0	1	0	1	0	0	0	0	1	0	1	0	0	0	2	2	4	4	2	2	1	2	4	2	1	3	2	2	3	3	2	2	3	1	2	3
27198	女	1	0	0	0	0	0	0	0	0	0	0	0	0	0	1	1	0	1	0	0	1	1	1	0	0	0	2	1	1	2	2	3	3	1	4	1	1	1	1	3	2	1	1	1	1	1	1	2
26853	女	1	0	0	0	0	0	0	0	0	0	0	0	0	0	1	0	0	1	0	0	0	1	0	0	0	0	2	1	2	1	2	1	1	1	1	1	1	2	2	2	2	1	1	1	2	1	2	2
26919	女	0	0	0	0	0	0	0	0	0	0	0	0	0	0	1	1	0	0	0	0	0	0	0	0	0	1	2	3	3	3	2	1	1	1	3	2	1	1	1	3	3	2	3	3	4	3	3	3
15361	女	0	1	0	0	0	0	0	0	0	0	0	0	0	0	1	1	1	1	1	0	0	0	0	0	0	0	2	2	2	2	2	3	3	3	3	3	2	2	2	2	2	2	3	2	2	4	3	2
26888	女	0	0	0	0	0	0	0	0	0	0	0	0	1	0	1	1	0	0	0	0	0	0	0	0	0	0	1	1	2	2	1	1	1	1	1	1	1	2	4	2	1	3	3	2	5	3	2	3
26740	女	0	0	0	0	0	0	0	0	0	1	0	0	0	0	1	1	0	1	1	0	0	1	1	1	1	0	2	2	2	3	2	2	1	2	2	2	1	3	4	2	2	2	3	3	3	3	2	3
26957	女	0	0	0	0	0	0	0	0	0	0	0	0	0	0	1	1	0	0	1	0	0	0	1	0	1	0	2	2	2	2	3	2	1	2	2	2	1	2	2	2	2	2	2	2	3	2	2	2
26809	女	0	0	0	0	0	0	0	0	0	0	0	0	0	0	1	1	0	0	1	0	0	0	1	1	0	1	3	3	3	3	2	1	1	2	3	1	1	1	1	2	2	1	2	1	2	1	1	3
26492	女	0	0	0	0	0	0	0	0	0	0	0	0	0	0	1	1	0	0	0	0	0	1	1	0	1	1	3	2	4	4	3	1	1	2	4	2	1	1	1	1	2	1	2	3	4	5	1	4
27177	女	1	0	0	0	0	0	0	0	0	0	0	0	0	0	1	1	0	0	1	0	0	0	0	0	1	0	2	1	1	2	1	2	1	2	2	2	1	1	1	2	1	1	2	1	1	1	2	2
27120	女	0	0	0	0	0	0	0	0	0	0	0	0	0	0	1	0	0	1	0	0	0	0	1	1	0	0	2	2	3	3	2	2	2	2	3	2	1	2	2	2	3	2	2	3	3	3	3	3
26487	女	0	0	0	0	0	0	0	0	0	0	0	0	0	0	0	0	0	0	0	0	0	0	1	0	0	1	1	2	2	2	1	1	1	1	1	1	1	1	1	1	2	1	1	2	2	1	1	2
10857	女	1	0	0	0	0	0	0	0	0	0	0	0	1	0	1	1	1	1	0	1	1	1	1	1	1	0	2	4	3	3	1	2	3	3	3	2	1	3	4	2	3	2	3	3	1	2	1	3
27106	女	1	0	0	0	0	0	0	0	0	0	0	0	0	0	1	1	0	0	0	0	0	0	0	0	0	1	2	2	2	2	2	2	3	2	2	2	4	2	3	2	3	2	2	2	3	4	4	4
25462	女	1	0	1	0	0	0	0	0	0	0	0	0	0	0	0	0	0	0	0	0	0	0	0	0	0	0	1	1	1	1	1	1	1	1	1	1	1	3	3	2	1	1	1	1	1	3	1	2
26251	女	1	1	0	0	0	1	0	0	0	0	0	0	0	0	1	1	1	1	1	0	1	0	1	1	0	1	3	2	4	2	2	1	1	1	1	1	1	1	4	1	1	1	1	1	1	1	2	2
23335	女	0	0	0	0	0	0	0	0	0	0	0	0	0	0	1	1	0	0	0	1	0	0	1	0	0	0	2	1	3	2	1	2	1	1	2	1	1	3	1	2	2	1	2	2	1	1	1	1
15764	女	0	0	0	0	0	0	0	0	0	0	0	0	0	0	1	0	1	1	0	1	1	0	0	0	0	0	2	3	3	3	1	2	1	1	2	2	1	1	1	1	3	1	1	3	4	1	1	3
25825	女	0	1	0	0	0	0	0	0	0	0	0	0	0	0	0	0	0	1	0	0	0	0	0	0	0	0	2	1	1	2	1	1	1	1	2	1	1	1	3	1	2	1	2	1	3	1	1	3
26794	女	1	0	0	0	0	0	0	0	0	0	0	0	0	0	1	0	0	0	0	0	0	0	1	0	0	0	2	2	2	2	1	1	2	3	2	1	1	1	1	1	2	1	1	1	1	2	1	3
26473	女	1	1	0	0	0	0	1	0	0	0	0	0	0	0	1	1	0	1	0	0	0	0	0	0	1	0	3	1	3	2	1	1	1	2	2	1	1	2	2	2	3	3	3	3	3	1	1	3
26218	女	1	0	0	0	0	0	0	0	0	0	0	0	0	0	0	0	0	0	0	0	0	0	0	0	0	0	2	1	2	1	2	1	1	1	1	1	1	1	2	1	1	1	1	2	1	1	1	1
5665	女	0	0	0	0	0	0	0	0	0	0	0	0	0	0	1	1	1	1	1	1	1	1	1	1	1	1	3	2	3	2	1	2	1	2	2	2	3	3	4	2	3	1	1	1	1	1	2	3
23914	女	0	0	0	0	0	0	0	0	0	0	0	0	0	0	1	1	0	1	1	0	1	0	0	1	0	0	1	1	2	1	2	2	2	1	2	1	1	1	3	1	2	1	1	1	1	1	1	2
26610	女	0	0	0	0	0	0	0	0	0	0	0	0	0	1	1	1	1	1	1	0	1	1	1	1	1	1	2	3	3	3	2	2	3	2	3	2	1	2	2	3	3	3	3	3	3	1	3	3
26468	女	1	0	0	0	0	0	0	0	0	0	0	0	0	0	0	0	0	0	0	0	0	0	0	0	0	0	1	1	2	1	1	1	1	1	1	1	1	1	1	1	1	1	1	1	1	1	1	1
26552	女	0	0	0	0	0	0	0	0	0	0	0	0	0	0	0	0	0	0	0	1	0	0	0	0	0	0	1	1	2	1	1	1	1	1	1	1	1	1	1	2	2	2	1	1	1	1	1	1
26689	女	0	0	0	0	0	0	0	0	0	0	0	0	0	0	0	0	1	0	0	0	0	0	1	0	0	0	1	1	1	1	1	1	1	1	1	1	1	1	1	1	1	1	1	2	2	1	1	2
26937	女	0	0	0	0	0	0	0	0	0	0	1	0	0	1	1	1	1	0	1	1	1	1	1	1	1	1	2	2	2	2	2	2	1	2	2	2	2	2	4	3	4	3	3	1	2	2	2	2
26088	女	0	0	0	0	0	0	0	0	0	0	0	0	0	0	0	0	0	0	0	0	0	0	0	0	0	0	2	1	3	2	2	2	2	2	3	1	1	1	1	2	2	2	1	3	3	3	2	4
26883	女	0	0	0	1	0	1	0	0	0	0	0	0	0	0	1	0	0	1	0	1	0	0	0	0	0	0	1	1	2	2	3	2	1	2	3	1	1	1	1	1	1	1	2	1	1	1	1	2
26576	女	1	0	0	0	0	0	0	0	0	0	0	0	0	0	1	1	0	0	0	1	0	0	0	0	0	0	1	1	2	1	1	1	1	1	5	1	1	1	1	1	1	1	1	1	1	1	1	1
26761	女	1	1	1	0	0	0	0	0	0	0	0	0	0	0	1	1	0	0	0	0	0	0	0	0	0	0	2	2	2	2	2	1	1	1	1	1	1	1	2	1	2	2	3	2	2	4	3	2
26044	女	0	1	0	0	0	0	0	0	0	0	0	0	0	0	1	0	1	0	0	0	0	0	0	0	0	0	2	2	3	2	2	1	2	1	3	2	2	3	4	2	2	2	2	2	2	1	2	2
26938	女	0	0	0	0	0	0	0	0	0	0	0	0	0	0	0	1	0	0	0	1	0	0	1	0	0	0	2	2	1	2	2	2	1	1	1	1	1	1	1	1	2	2	2	1	2	1	1	4
26300	女	0	0	0	0	0	0	0	0	0	0	0	0	0	0	1	1	0	1	1	0	0	0	0	0	1	0	3	1	2	2	2	2	3	2	3	2	1	1	2	2	3	2	2	2	3	1	1	2
23428	女	1	0	0	0	0	0	0	0	0	0	0	0	0	0	1	0	1	1	0	0	0	0	0	1	0	0	1	1	1	2	2	1	1	1	2	2	1	3	4	2	2	1	1	1	1	1	1	1
26542	女	0	0	0	0	0	0	0	0	0	0	0	0	0	0	1	0	0	0	0	0	0	0	1	0	0	1	2	2	3	3	2	2	1	1	3	1	1	1	1	2	2	2	2	3	3	3	1	2
27061	女	0	0	0	0	0	0	0	0	0	0	0	0	0	0	1	0	0	1	0	0	0	0	0	0	1	0	1	1	2	2	1	1	1	1	3	1	1	3	4	2	2	1	1	2	1	1	1	3
27396	女	0	0	0	0	0	0	0	0	0	0	0	0	0	0	1	1	0	0	1	0	0	0	0	1	1	0	1	1	1	1	1	1	1	1	1	1	1	1	1	3	2	1	1	4	1	1	1	5
14991	女	1	0	0	0	0	0	0	0	0	0	0	0	0	0	1	0	1	0	0	0	0	1	0	0	0	0	2	2	2	2	2	2	2	2	2	1	1	1	1	1	1	1	1	1	1	1	1	1
27188	女	0	0	0	0	0	0	0	0	0	0	0	0	0	0	0	0	0	0	0	0	0	0	0	0	0	0	1	1	1	1	1	1	1	1	1	1	1	1	1	1	1	1	1	1	1	1	1	1
4457	女	0	0	0	0	0	0	0	0	0	0	0	0	0	0	0	0	0	0	0	0	0	1	0	0	0	0	1	1	1	1	1	1	1	1	1	1	1	1	1	1	1	1	1	1	1	1	1	1
26718	男	0	1	0	0	0	0	1	0	0	0	0	0	0	0	1	0	0	0	0	0	0	0	0	0	0	0	1	1	1	1	1	3	1	1	1	1	1	1	1	1	1	2	1	1	1	1	1	1
27362	男	0	0	0	0	0	0	0	0	0	0	0	0	0	0	1	1	0	1	0	1	1	0	1	1	1	1	2	2	2	2	1	1	2	3	2	1	1	3	2	2	3	2	2	1	1	1	1	1
26346	男	0	0	0	0	0	0	0	0	0	0	0	0	0	0	0	0	0	1	0	0	0	0	1	0	0	0	2	2	3	3	2	1	2	1	1	1	1	1	1	1	4	2	1	1	1	1	2	3
26581	男	1	0	0	0	0	0	0	0	0	0	0	0	0	0	0	0	1	1	0	1	0	1	1	0	0	0	2	2	2	2	2	2	1	2	2	1	1	1	1	1	2	2	2	1	1	2	2	2
27091	男	0	0	0	0	0	0	0	0	0	0	0	0	0	0	0	1	0	1	0	1	0	0	1	0	1	0	2	3	3	3	1	1	2	1	1	1	1	1	2	2	3	3	3	1	1	1	1	3
27159	男	0	0	0	0	0	0	0	0	0	0	0	0	0	0	0	0	1	0	0	1	1	0	1	0	0	0	2	2	3	2	1	1	1	2	2	2	3	3	2	2	2	2	2	1	3	2	2	2
27080	男	1	0	0	0	0	0	0	0	0	0	0	0	0	0	1	1	1	0	0	1	0	0	1	0	1	0	2	1	4	3	1	2	2	2	2	2	1	2	4	5	5	3	3	2	2	2	2	2
26798	女	0	0	0	0	0	0	0	0	0	0	0	0	0	0	1	1	1	1	1	1	1	0	1	1	1	1	2	1	2	1	1	2	2	1	1	1	1	2	1	1	1	1	1	1	1	1	1	1
26737	女	1	0	0	0	0	0	0	0	0	0	0	0	0	0	1	0	0	0	0	0	0	0	0	0	0	0	1	1	1	1	1	1	1	1	1	1	1	1	1	1	1	1	1	1	1	1	1	1
27154	女	0	0	0	0	0	0	0	0	0	0	0	0	0	0	1	1	1	0	0	0	1	1	0	0	0	0	2	2	2	2	1	1	2	2	2	1	1	3	1	1	2	1	1	2	1	1	1	1
27034	女	1	0	0	0	0	0	0	0	0	0	0	0	0	0	0	0	0	1	0	0	0	0	1	1	0	0	2	3	2	2	1	1	1	1	1	1	1	1	1	1	3	1	1	1	4	2	1	2
27349	女	1	0	0	0	0	1	0	0	0	0	0	0	0	0	1	1	1	1	1	1	1	1	1	1	0	1	3	3	2	3	1	3	1	1	3	1	1	1	2	2	2	1	2	1	2	1	1	4
27067	女	1	0	0	0	0	0	0	0	0	0	0	0	0	0	0	0	0	0	0	0	0	0	1	0	0	0	2	1	2	2	1	2	2	2	2	1	1	1	2	2	2	1	1	2	2	1	1	1
27331	女	0	0	0	0	1	0	0	0	0	0	0	0	0	0	1	0	0	0	0	0	0	0	0	0	0	0	2	1	2	1	1	1	1	1	1	1	1	2	1	1	1	2	1	1	1	1	1	1
26720	女	0	0	0	0	0	0	0	0	0	0	0	0	0	0	0	0	0	0	0	1	0	0	0	0	0	0	1	1	1	1	1	1	1	1	1	1	1	1	1	1	1	1	1	1	1	1	1	1
26944	女	1	0	0	0	0	0	0	0	0	0	0	0	0	0	0	0	0	1	0	0	0	0	1	0	0	0	3	4	3	3	2	2	1	1	2	1	1	1	1	3	4	3	4	2	3	3	3	3
26664	女	0	0	0	0	0	0	0	0	0	0	0	0	0	0	0	0	1	1	0	0	0	0	1	0	0	0	2	2	2	2	2	1	1	1	1	1	1	1	1	1	2	2	2	2	2	1	2	2
26256	女	1	0	0	0	0	0	0	0	0	0	0	0	0	0	1	0	0	0	0	0	0	0	0	0	0	0	1	1	1	1	1	1	1	1	1	1	1	2	2	1	1	1	1	1	1	1	1	1
26417	女	0	0	0	0	0	0	0	0	0	0	0	0	0	0	0	0	0	0	0	0	0	0	0	0	0	0	1	1	1	1	1	1	1	1	2	1	1	1	1	1	1	1	1	1	1	1	1	1
27361	女	1	0	0	0	0	0	0	0	0	0	0	0	0	0	1	1	0	0	0	0	0	0	0	0	0	0	1	1	1	1	1	2	1	1	2	2	1	1	1	2	2	1	2	1	1	1	1	1
26716	女	0	0	0	0	0	0	0	0	0	0	0	0	0	0	0	0	0	0	1	0	0	0	1	0	1	0	2	3	3	2	2	1	1	1	2	1	1	1	2	2	2	2	2	2	1	2	1	1
26245	女	1	0	0	0	0	0	0	0	0	0	0	0	0	0	0	0	0	1	0	1	1	0	1	0	0	0	2	2	3	3	1	2	3	2	3	2	1	2	3	3	3	2	2	2	3	3	3	3
27127	女	1	0	0	0	0	0	0	0	0	0	0	0	0	0	1	0	0	0	0	0	0	0	0	0	0	0	1	1	2	1	1	1	1	1	1	1	1	1	1	1	1	1	1	1	1	1	1	1
26857	女	0	0	0	0	0	0	0	0	0	0	0	0	0	0	1	1	0	0	1	1	1	1	1	0	0	0	2	1	3	3	1	2	1	1	4	2	1	1	1	2	2	1	1	2	2	1	1	3
27352	女	1	0	0	0	0	0	0	0	0	0	0	0	0	0	1	1	1	1	1	0	1	0	1	1	0	1	2	2	2	3	1	2	1	1	1	1	1	1	1	1	3	1	1	1	1	1	1	2
26665	女	0	0	0	0	0	0	0	0	0	0	0	0	0	0	1	1	1	1	0	1	1	1	1	1	0	1	2	2	3	4	1	2	1	2	2	1	1	1	1	3	1	1	1	1	1	1	1	2
27089	女	0	0	0	0	0	0	0	0	0	0	1	0	0	0	0	0	1	1	1	0	0	0	0	0	0	0	2	1	1	2	2	1	2	2	2	1	1	2	3	2	2	1	2	1	1	1	1	1
26634	女	1	0	0	0	0	0	0	0	0	0	0	0	0	0	1	0	1	0	0	0	0	0	1	0	0	0	1	1	2	3	1	1	1	1	1	1	1	2	3	2	2	2	2	1	1	1	1	2
26783	男	1	0	0	0	0	0	0	1	0	0	0	0	0	0	1	1	1	1	1	1	1	1	1	1	1	0	1	1	1	1	1	1	1	1	1	1	1	1	1	1	1	2	4	1	1	1	1	1
27138	男	0	0	0	0	0	0	0	0	0	0	0	0	0	0	0	0	0	1	0	1	1	0	1	0	0	0	2	1	3	1	1	1	3	1	1	1	1	1	1	1	1	1	1	1	1	1	1	1
26772	男	1	0	0	0	0	0	0	0	0	0	0	0	0	0	1	0	0	0	0	0	1	0	0	0	1	0	1	1	1	1	1	1	1	1	1	1	1	1	1	1	1	1	1	1	1	1	1	1
7528	男	0	0	0	0	1	0	0	0	0	0	0	0	0	0	1	1	1	1	1	1	1	1	1	0	1	0	3	2	3	2	3	3	2	2	3	2	2	4	3	2	2	4	4	3	2	1	2	2
26704	男	1	0	0	0	0	0	0	0	0	0	0	0	0	0	0	0	0	0	1	0	0	0	1	0	1	1	2	1	3	1	1	2	1	1	2	2	1	1	1	1	1	1	2	1	1	1	1	2
20885	女	0	0	0	0	0	0	0	0	0	0	0	1	0	0	1	1	1	1	1	1	1	1	1	1	1	1	3	2	3	3	2	3	3	2	3	2	1	3	3	2	3	2	2	2	3	2	2	3
8117	女	0	0	0	0	0	0	0	0	0	0	0	0	0	0	1	1	1	1	1	1	1	0	1	1	1	1	3	3	3	3	3	3	3	3	3	3	3	3	3	3	3	3	3	3	3	3	3	3
21199	女	1	0	0	0	0	0	0	0	0	0	0	0	0	0	1	1	1	0	1	0	1	0	1	1	1	0	2	1	3	1	1	5	1	1	5	3	1	3	2	3	3	2	1	1	2	1	1	2
4425	女	0	0	0	0	0	0	0	0	0	0	0	0	0	0	1	1	1	1	1	1	0	1	1	1	1	1	2	2	3	1	2	2	2	3	2	1	1	1	1	1	1	2	1	1	1	1	1	1
21190	男	1	0	0	0	0	0	0	0	0	1	0	0	0	0	1	1	1	1	1	1	1	1	1	1	1	1	2	2	2	2	1	2	3	1	2	2	1	1	1	1	2	1	1	1	2	1	1	2
20825	女	0	0	0	0	0	0	0	0	0	0	0	0	0	0	1	1	1	1	1	1	1	1	1	1	1	1	3	3	3	2	2	2	3	2	3	3	1	2	1	3	3	2	3	3	4	1	2	4
4921	女	0	0	0	0	0	1	0	0	0	0	0	0	0	0	1	1	1	1	1	1	1	1	1	1	1	1	3	3	2	3	2	3	3	1	3	2	1	1	3	1	3	2	3	1	1	1	1	1
4907	女	1	0	0	0	0	0	0	0	0	0	0	0	0	0	1	1	1	1	1	1	1	1	1	1	1	1	2	2	2	2	2	2	2	2	2	2	2	2	2	2	2	2	2	2	2	2	2	2
4909	女	1	0	0	0	0	0	0	0	0	0	0	0	0	0	1	1	0	1	0	1	1	1	1	1	1	1	2	2	3	3	2	3	1	2	3	2	4	4	5	2	3	3	3	1	2	3	1	2
20838	女	1	0	0	0	0	0	0	0	0	0	0	0	0	0	1	1	1	0	1	1	1	1	1	1	1	1	4	4	2	2	2	2	2	3	3	1	1	5	5	3	3	3	4	1	2	1	1	2
21189	女	1	0	0	0	0	0	0	0	1	1	0	1	0	1	1	1	1	1	1	1	1	1	1	1	1	1	4	3	4	4	4	3	3	3	3	1	1	1	1	3	3	1	4	1	3	1	1	3
20882	女	1	0	0	0	0	1	0	0	1	0	0	0	0	1	1	1	1	0	1	0	0	0	0	1	1	0	2	1	1	2	2	2	2	2	2	2	1	1	1	2	3	1	2	1	2	1	1	1
20819	女	0	0	0	0	0	1	0	0	0	0	0	0	0	1	1	1	1	1	1	1	1	1	1	1	1	1	2	2	2	4	2	2	3	2	2	2	1	1	1	2	2	2	2	2	1	2	2	2
20873	男	1	0	0	0	0	0	0	0	0	0	0	0	0	0	1	1	1	0	1	1	1	1	1	1	1	1	3	3	3	3	2	3	2	3	3	3	1	2	4	3	3	3	3	2	4	3	3	4
20807	女	0	0	0	0	1	0	0	0	0	0	0	0	0	0	1	1	1	1	1	1	1	1	1	1	1	1	3	5	3	2	2	3	1	3	2	2	1	1	1	5	5	4	3	3	5	5	4	4
4914	女	0	0	0	0	0	0	0	0	0	0	0	0	0	0	1	1	1	1	1	1	1	0	1	1	1	1	3	3	3	3	2	3	2	2	2	2	1	1	3	3	3	4	4	3	3	4	2	3
20861	女	0	0	0	1	0	0	0	0	0	0	0	0	0	0	1	1	0	1	1	1	1	1	1	1	1	1	2	2	4	1	2	1	2	2	4	1	1	2	2	2	2	2	3	1	1	1	1	2
20827	女	0	0	0	0	0	1	0	0	0	0	0	1	0	0	1	1	1	1	1	1	1	1	1	1	1	0	2	3	2	3	3	2	3	2	2	2	1	1	1	2	2	1	2	1	3	2	1	2
3707	女	1	0	0	0	0	0	0	1	0	0	0	0	0	0	1	1	0	1	0	1	1	0	1	1	1	0	2	3	2	3	2	2	3	3	1	2	1	1	1	1	2	2	2	2	3	2	2	2
20839	女	0	0	0	0	0	0	0	0	0	0	0	0	0	0	1	1	1	1	1	1	1	0	1	1	1	1	4	2	2	2	1	1	1	1	3	2	1	2	3	3	4	1	2	2	2	1	2	2
20820	女	1	0	0	0	0	0	0	0	0	0	0	0	0	0	1	1	1	1	1	1	1	0	1	1	1	1	2	2	3	2	1	1	3	3	2	1	1	1	2	1	2	2	1	1	1	1	1	2
3358	女	0	0	0	0	0	0	0	0	0	0	0	0	0	0	1	1	1	1	1	1	1	1	1	1	0	1	3	2	2	2	2	2	2	2	2	2	2	2	2	2	2	3	2	1	3	3	2	2
20803	女	0	0	0	0	0	0	0	0	0	0	0	0	0	0	1	1	1	1	1	1	1	0	1	0	1	0	4	2	3	4	2	3	4	2	2	2	1	2	1	3	4	2	3	2	3	1	1	3
20851	女	0	0	1	0	0	0	0	1	0	0	0	0	0	1	1	1	0	1	0	1	0	0	0	0	1	0	2	1	2	1	1	3	2	3	2	1	1	3	5	2	2	2	3	1	1	1	1	1
4406	女	0	0	0	0	1	0	0	0	0	0	0	0	0	0	1	1	0	1	1	1	1	1	1	1	1	1	2	2	2	2	1	2	1	2	2	2	1	1	2	2	2	2	2	3	1	1	2	3
3997	女	1	0	0	0	0	0	0	0	0	0	0	0	1	1	1	1	0	0	0	0	1	0	1	0	0	0	1	1	2	2	1	2	1	2	2	1	1	2	4	2	2	2	3	2	2	1	2	2
20815	男	0	0	0	0	0	0	0	0	0	0	0	0	1	0	1	1	1	1	1	0	1	0	1	0	1	1	2	3	4	1	2	2	3	3	3	2	1	4	5	2	2	3	4	2	2	1	3	4
24356	女	0	0	0	0	0	0	0	0	0	0	0	0	0	0	1	0	1	1	0	0	0	0	1	0	0	1	2	3	2	3	1	1	1	1	1	1	1	1	1	1	1	1	1	1	1	1	1	2
23752	女	0	0	0	0	0	0	0	0	0	0	0	0	0	0	1	1	0	0	1	1	0	0	0	1	0	0	3	4	2	3	1	2	2	2	2	2	4	4	4	3	4	2	2	4	3	4	3	4
16403	女	0	0	0	0	0	0	0	0	1	1	0	0	0	1	1	1	1	1	1	1	1	1	1	1	1	1	4	4	3	3	2	4	4	3	3	3	1	4	4	4	3	5	5	2	3	4	5	5
25831	女	0	0	0	0	0	0	0	0	0	0	0	0	0	0	0	0	0	0	0	0	0	0	0	0	0	1	2	2	2	2	2	2	1	1	3	1	3	3	2	2	2	2	1	1	1	1	1	2
23772	女	0	0	0	0	0	1	0	0	0	0	0	0	0	0	0	0	1	0	0	0	0	0	0	1	0	0	2	2	2	3	1	1	1	3	3	1	1	1	1	1	2	2	3	2	3	2	2	3
23876	女	0	0	0	0	0	0	0	0	0	0	0	0	0	0	0	0	0	0	0	0	0	0	1	0	0	0	3	1	3	2	1	1	1	1	2	2	1	1	1	2	2	1	2	1	2	1	1	2
22403	女	0	0	0	0	0	0	0	0	0	0	0	0	0	0	1	0	0	0	0	0	0	0	1	0	0	0	2	1	1	2	1	1	1	1	1	1	1	1	1	2	2	1	1	1	2	1	1	1
23870	女	0	0	0	0	0	0	0	0	0	0	0	0	0	0	1	0	1	0	0	0	0	0	1	0	0	1	2	3	2	3	1	1	1	1	2	1	1	1	1	1	2	1	2	1	2	1	1	2
23871	女	0	0	0	0	0	0	0	0	0	0	0	0	0	0	1	0	1	0	1	1	0	0	1	1	0	0	1	1	3	1	1	1	1	1	1	1	1	1	1	1	1	1	1	1	1	1	1	1
24364	女	0	0	0	0	0	0	0	0	0	0	0	0	0	0	1	1	1	1	1	1	1	1	1	1	1	1	3	1	4	4	1	4	2	1	2	2	1	1	1	1	2	2	2	1	1	1	1	4
23634	女	0	0	0	0	1	0	0	1	0	0	0	0	0	0	1	1	0	1	0	0	0	0	1	1	1	1	2	2	2	2	3	1	1	2	2	1	1	3	1	2	3	2	3	1	3	1	3	2
24066	女	0	0	0	0	0	0	0	0	0	0	0	0	0	0	1	0	1	0	0	0	0	1	1	1	0	1	3	2	2	2	1	2	1	1	1	1	1	3	4	2	3	2	2	1	2	1	1	1
23782	女	0	0	0	0	0	0	0	0	0	0	0	0	0	0	0	0	0	1	1	1	0	0	0	0	1	0	2	1	2	1	1	1	1	1	1	1	1	3	4	1	1	1	1	1	1	1	1	1
23761	女	0	0	0	0	0	0	0	0	0	0	0	0	0	0	1	0	0	0	0	0	0	0	1	0	0	0	1	1	2	2	1	1	1	3	3	1	1	2	1	1	1	2	1	1	1	1	1	2
23768	女	0	0	0	0	0	0	0	0	0	0	0	0	0	0	1	0	1	0	1	0	0	0	1	0	0	0	2	3	2	2	1	2	1	1	3	1	1	3	1	2	3	2	3	2	4	3	3	3
24385	女	0	0	0	0	1	0	0	0	0	0	0	0	0	0	0	1	0	0	1	0	0	0	1	0	0	1	1	1	2	1	1	2	1	1	2	1	1	1	2	1	2	1	1	1	2	1	1	3
23755	女	0	0	1	0	1	0	0	1	0	0	0	0	0	0	0	0	0	0	0	0	0	0	0	0	1	0	2	1	2	2	1	1	1	2	2	1	1	1	3	1	2	3	2	2	1	1	1	2
24352	女	0	0	1	0	1	0	0	0	0	0	0	0	1	0	1	0	0	0	0	0	0	0	1	0	0	0	2	1	3	1	1	1	1	1	1	1	1	1	3	1	1	2	1	1	1	1	1	3
23763	女	0	0	0	0	0	0	0	0	0	0	0	0	0	0	0	0	0	1	0	0	0	0	1	0	0	0	2	1	2	1	1	1	2	1	1	1	1	1	1	2	1	1	1	1	1	1	1	1
24144	女	1	0	0	0	0	0	0	0	0	0	0	0	0	0	1	0	1	0	0	0	0	0	1	0	0	0	2	3	3	4	1	2	1	1	2	2	1	4	4	1	2	1	1	1	1	1	1	1
23948	女	0	0	0	0	0	0	0	0	0	0	0	0	1	0	1	0	0	1	0	0	0	0	0	1	0	0	2	3	3	2	2	2	2	2	2	2	1	1	1	2	2	3	2	2	3	4	3	3
23734	女	0	0	0	0	0	0	0	0	0	0	1	0	0	0	1	1	0	1	0	0	0	0	1	0	1	0	2	3	2	2	2	2	1	2	2	1	1	1	1	2	2	2	2	2	1	1	1	3
24383	女	1	0	0	0	0	0	0	0	0	0	0	0	0	0	0	0	0	1	0	0	0	0	0	0	1	0	3	3	2	3	2	1	2	1	3	2	1	1	1	1	3	2	3	3	3	3	3	3
23776	男	0	0	0	0	0	0	0	0	0	0	0	0	0	0	1	0	0	0	0	0	0	0	0	0	0	0	2	2	2	1	1	1	1	2	2	2	1	1	2	2	2	1	1	1	2	2	2	2
3935	男	0	0	0	0	1	0	0	1	0	0	0	0	0	0	1	0	1	0	0	1	0	0	1	0	0	0	2	2	2	2	2	2	1	1	2	2	1	1	2	3	4	1	2	2	2	2	2	1
24397	男	1	0	0	0	0	0	0	0	0	0	0	0	0	0	1	0	1	0	0	0	0	0	1	0	0	0	1	1	2	2	1	1	1	1	2	1	1	1	1	1	1	1	1	1	1	1	1	1
23750	男	0	0	0	0	0	0	0	0	0	0	0	0	0	0	0	0	0	0	0	0	0	0	0	0	0	0	1	1	1	1	1	1	1	1	1	1	1	1	1	1	1	1	1	2	1	1	1	1
28713	男	1	0	0	0	0	0	0	0	0	0	0	1	0	0	1	0	1	1	1	1	1	0	0	0	1	0	2	2	3	1	2	2	2	1	2	2	1	3	3	1	1	1	2	1	2	1	1	3
23924	男	1	0	0	0	0	0	0	0	0	0	0	0	0	0	0	0	0	0	1	0	1	1	0	0	0	0	2	1	1	1	2	2	1	1	1	1	1	1	1	1	1	1	1	1	1	1	1	2
23775	男	0	0	0	0	0	0	0	0	0	0	0	0	0	0	1	1	0	0	0	0	1	0	0	1	1	0	2	1	2	2	2	2	1	3	2	2	1	1	1	2	2	1	1	1	2	1	2	2
24388	男	1	0	0	1	1	1	0	0	0	0	0	0	0	0	1	1	0	1	1	1	1	1	0	1	1	1	3	4	3	4	3	4	3	3	3	2	3	4	3	3	3	3	3	2	3	3	2	3
22404	男	1	0	0	0	0	0	0	0	0	0	0	0	0	0	0	0	0	0	0	0	0	0	0	0	0	0	2	1	1	2	2	1	1	1	1	1	1	1	1	1	1	1	1	1	1	1	1	1
25352	女	0	0	0	0	0	0	0	0	0	0	0	0	0	0	1	0	0	0	1	1	1	0	1	0	0	0	2	1	3	3	2	2	1	3	3	2	1	4	4	3	3	3	4	2	4	2	3	4
6400	女	0	0	0	0	1	0	0	0	0	0	0	0	0	0	1	0	0	1	0	1	0	0	1	0	0	1	5	3	5	1	1	1	2	4	4	4	1	1	1	2	5	4	2	2	1	1	1	4
27862	女	0	0	0	0	1	0	0	0	0	0	0	0	0	0	0	0	0	1	0	0	0	0	0	0	1	0	2	3	2	3	2	2	1	3	2	1	1	3	3	2	3	3	2	3	1	2	1	3
23879	女	0	0	0	0	0	0	0	0	0	0	0	0	0	0	1	1	0	1	1	0	0	1	1	1	0	1	1	1	3	3	2	1	1	1	2	1	1	2	1	1	2	1	1	1	3	3	1	3
27880	女	1	1	0	0	0	0	0	0	0	0	0	0	0	0	0	0	0	0	0	0	0	0	0	0	0	0	1	1	2	2	2	2	1	1	2	1	1	2	1	1	1	2	2	1	2	1	1	2
19197	女	0	0	0	0	0	1	0	1	0	0	0	0	0	1	1	1	0	1	1	0	1	0	1	1	1	0	2	1	2	2	2	1	1	2	2	2	1	1	1	1	2	3	4	2	2	1	1	2
27912	女	0	0	0	0	0	0	0	0	0	0	0	0	0	0	0	0	0	0	0	0	0	0	0	0	0	0	1	1	1	1	2	2	1	1	1	1	1	1	1	1	1	1	1	1	1	1	1	1
23112	女	0	0	0	0	0	0	0	0	0	0	0	0	0	0	1	1	0	1	0	0	0	0	1	0	0	0	3	1	3	1	1	1	1	3	2	2	1	2	3	1	4	2	1	1	1	1	1	2
23893	女	0	0	0	0	0	0	0	0	0	0	0	0	0	0	0	0	1	0	0	0	0	0	0	0	0	0	1	1	2	1	2	1	1	2	2	1	1	1	1	2	2	2	2	1	2	1	1	2
23249	女	0	0	0	0	0	0	0	0	0	0	0	0	0	0	0	0	0	1	0	0	0	0	0	0	0	0	1	1	3	1	3	1	1	2	3	1	1	1	1	1	1	1	1	4	1	1	1	3
28147	女	0	0	0	0	0	0	0	0	0	0	1	0	0	0	1	0	0	1	0	0	1	1	0	0	1	0	2	2	3	3	2	1	2	3	3	1	1	1	1	2	1	2	2	1	3	4	2	4
27861	女	1	0	0	0	0	0	0	0	0	0	0	0	0	0	1	0	0	0	0	0	0	0	1	0	0	0	2	1	3	3	1	2	1	1	2	1	1	1	1	1	1	1	3	3	1	1	1	2
26134	女	0	0	0	0	0	0	0	0	0	0	0	0	0	0	1	1	1	1	1	0	0	0	1	0	0	0	2	2	2	2	1	1	2	2	2	2	1	1	1	1	3	1	2	1	3	1	1	2
28477	女	0	0	0	0	0	0	0	0	0	0	0	0	0	0	0	0	0	0	0	0	0	0	0	0	0	0	1	1	2	2	1	1	1	1	1	1	1	1	1	1	2	2	1	1	2	1	1	1
28463	女	0	0	0	0	0	0	0	0	0	0	0	0	0	0	0	0	0	0	0	0	0	0	0	0	0	0	3	4	3	3	2	2	1	2	3	2	4	4	5	3	3	3	2	2	3	3	3	3
3519	女	0	0	0	0	0	0	0	0	0	0	0	0	0	0	1	1	1	1	1	1	1	1	1	1	1	1	2	3	2	2	2	2	3	3	2	2	1	4	4	2	3	2	2	2	2	2	2	3
24675	女	0	0	0	0	1	0	0	0	0	0	0	0	0	0	0	0	0	0	0	0	0	0	0	0	0	0	2	2	1	1	2	1	1	2	2	1	1	1	3	2	2	2	2	1	1	1	1	1
27639	女	0	0	0	0	0	0	0	0	0	0	0	0	0	0	1	0	1	1	1	1	1	0	1	1	1	1	3	3	3	2	2	1	3	2	2	2	1	1	1	2	3	1	2	1	1	1	1	2
27961	女	0	0	0	0	0	0	0	0	0	0	0	0	0	0	0	0	0	0	0	0	0	0	0	0	0	0	2	1	3	2	1	1	2	3	2	2	1	2	3	2	4	2	1	1	1	1	1	2
27621	女	1	0	0	0	0	0	0	0	0	0	0	0	0	0	0	0	0	0	0	0	0	0	0	0	0	0	1	1	2	1	2	1	1	2	1	1	1	1	1	1	1	1	1	1	1	1	1	1
27860	女	0	1	1	0	1	0	1	0	0	0	0	0	0	0	1	0	0	0	0	0	1	0	0	0	0	0	2	2	2	2	1	1	1	2	2	2	2	2	3	2	2	2	2	1	2	3	2	2
26580	女	0	0	0	0	0	0	0	0	0	0	0	0	0	0	1	0	0	0	1	0	0	0	0	1	1	0	2	1	1	1	1	1	1	1	2	1	2	3	3	2	4	1	1	1	1	1	1	2
23891	女	0	0	1	0	0	0	0	0	0	0	0	0	0	0	1	0	1	0	0	0	0	0	1	0	0	0	1	1	2	2	1	1	1	3	2	2	2	2	3	1	2	1	1	1	2	2	2	2
23106	女	0	0	0	0	1	0	0	0	0	0	0	0	0	0	0	0	0	0	0	0	0	1	0	0	0	0	2	1	2	1	1	1	1	2	2	1	1	1	1	1	1	4	1	1	1	2	1	2
23859	女	1	0	0	0	0	0	0	0	0	0	0	0	0	0	1	0	0	0	0	0	0	0	0	0	0	0	2	2	3	2	2	1	1	2	2	2	1	1	1	1	2	2	2	2	2	1	2	2
27850	女	0	0	0	0	0	0	0	0	0	0	0	0	0	0	1	0	0	0	0	0	0	0	0	0	0	0	2	2	3	3	2	1	2	3	2	3	1	2	3	2	3	2	2	2	4	2	2	2
23804	女	0	0	0	0	1	0	0	0	0	0	0	0	0	0	1	0	0	0	1	1	1	0	1	0	0	0	2	3	3	3	1	3	1	2	2	1	1	3	2	4	2	4	2	2	2	2	4	3
23507	女	0	0	0	0	0	0	0	0	0	0	0	0	0	0	1	1	0	0	1	1	1	0	1	1	1	0	3	3	2	4	3	2	1	2	1	1	1	1	2	2	4	3	5	2	4	3	3	4
27820	女	0	0	0	0	0	0	0	0	0	0	0	0	0	0	0	0	0	1	0	0	0	0	0	0	0	0	2	1	2	1	2	1	1	1	2	1	1	1	1	1	1	1	1	1	1	1	1	1
19099	女	0	0	0	0	0	0	0	0	0	0	0	0	0	0	1	1	1	0	0	1	0	0	1	1	0	0	2	2	3	4	2	1	1	3	3	3	1	3	5	3	3	3	2	3	3	3	2	3
3864	女	1	1	0	0	0	0	0	0	0	0	0	0	0	0	1	0	1	1	1	1	1	1	1	1	1	1	2	3	3	3	3	2	4	3	2	2	1	1	1	1	1	1	1	1	1	1	1	1
26139	女	0	0	0	0	1	0	0	0	0	0	0	0	0	0	1	0	0	1	1	0	0	1	1	0	1	0	2	3	3	3	2	2	3	3	3	2	2	2	2	2	2	3	3	3	2	1	1	3
23713	男	0	0	0	0	0	0	0	0	0	0	0	0	0	0	0	0	0	0	0	0	0	0	0	0	0	0	1	1	1	1	1	1	1	1	1	1	1	1	1	1	1	1	1	1	1	1	1	1
18904	男	0	0	0	0	0	0	0	0	0	0	0	0	0	0	1	1	1	1	1	1	1	1	1	1	1	1	2	3	3	2	2	1	1	2	3	2	1	3	2	2	3	2	1	2	2	4	4	2
23949	男	0	1	0	0	0	0	0	0	0	0	0	0	0	0	1	1	1	1	1	1	1	0	1	0	1	0	2	2	3	1	1	1	1	1	1	1	1	2	2	3	3	2	3	1	1	1	1	1
23138	男	0	0	0	0	1	0	0	0	0	0	0	0	0	0	1	1	1	1	0	1	1	0	0	0	1	0	2	2	2	1	2	2	1	1	1	1	2	2	3	3	3	4	2	3	2	3	3	3
28502	男	0	0	0	0	0	0	0	0	0	0	0	0	0	0	1	1	0	0	0	1	0	0	0	0	0	0	3	3	3	3	3	2	3	3	3	3	1	3	4	3	3	3	3	2	4	4	3	3
25528	男	0	0	0	0	0	0	0	0	0	0	0	0	0	0	0	0	0	0	0	0	0	0	1	0	0	1	1	1	2	2	1	1	1	1	1	1	1	1	1	1	2	1	1	1	1	1	1	2
23779	男	0	0	0	0	0	0	0	0	0	0	0	0	0	0	1	0	1	1	1	0	0	0	1	0	1	0	3	3	2	2	2	1	2	2	2	2	1	2	2	2	2	2	2	2	2	2	2	2
27891	男	1	0	0	0	0	0	0	0	0	0	0	0	0	0	0	0	0	0	0	0	0	0	0	0	0	0	1	1	1	1	1	1	1	1	1	1	1	1	1	1	1	1	2	2	1	1	2	1
23901	男	0	0	0	0	1	0	0	0	0	0	0	0	0	0	1	0	1	0	0	0	0	0	0	0	0	0	3	2	2	3	1	3	1	2	4	3	3	3	4	3	3	4	3	2	2	2	2	2
24204	女	1	0	0	0	0	0	0	0	0	0	0	0	0	0	1	0	1	0	0	1	0	0	0	0	0	0	2	1	2	1	1	1	1	1	2	1	1	1	1	1	1	1	1	1	1	1	1	2
24353	女	0	0	0	0	0	0	0	0	0	0	0	0	0	0	1	0	1	0	0	0	0	0	0	0	0	0	2	1	3	2	3	1	1	1	1	1	1	2	3	3	3	2	2	3	1	1	1	3
24308	女	0	0	0	0	1	0	0	0	0	0	0	0	0	0	0	0	0	0	0	0	0	0	0	0	0	0	2	1	2	1	1	1	1	1	1	1	1	2	2	2	2	1	2	1	1	1	1	2
24134	女	0	0	0	0	1	0	0	0	0	0	0	0	0	0	0	0	0	0	0	0	0	0	1	0	0	0	2	2	3	2	3	1	1	1	3	1	1	4	5	2	2	2	1	2	2	1	1	3
24130	女	1	0	0	0	1	0	0	0	0	0	1	0	1	0	1	1	1	1	1	1	1	1	1	1	1	1	3	2	2	2	3	3	1	2	4	3	1	3	5	3	3	2	3	2	4	5	2	3
16447	女	0	1	0	0	0	0	0	0	0	0	0	0	1	1	1	0	1	1	1	0	0	0	1	1	1	1	2	3	3	3	1	2	1	3	1	2	1	1	3	1	3	2	2	4	1	1	1	4
24344	女	0	0	0	0	0	0	0	0	0	0	0	0	0	0	1	1	0	0	1	1	1	0	0	0	1	0	2	3	2	3	1	1	1	1	1	1	1	1	1	2	2	2	1	1	1	1	1	2
16481	女	1	0	0	0	1	1	0	0	0	0	0	0	0	0	1	1	1	1	1	1	1	1	1	1	1	1	4	4	3	4	2	3	3	3	5	4	2	3	3	2	3	5	1	2	4	1	1	4
24294	女	0	0	0	0	1	0	0	0	0	0	0	0	0	0	1	0	0	1	0	0	0	0	1	0	1	0	2	1	3	3	2	1	1	2	3	2	1	4	5	2	3	2	1	2	1	1	1	3
23635	男	0	0	0	0	1	0	0	0	0	0	0	0	0	0	1	0	0	0	0	0	0	0	0	0	0	0	2	2	2	2	2	2	2	1	2	2	2	2	3	2	2	3	1	2	2	2	2	3
24276	男	0	0	0	0	0	0	0	0	1	0	0	0	0	1	1	0	1	0	1	1	1	0	1	1	1	1	2	1	3	2	2	1	2	1	2	2	2	2	2	3	2	1	2	1	1	1	1	2
16010	男	1	0	0	0	0	0	0	0	0	0	0	0	0	0	1	1	1	1	1	1	1	1	1	1	1	1	3	3	3	3	2	3	3	3	3	3	1	2	1	3	3	3	3	3	3	3	3	3
15951	男	0	1	0	0	0	0	0	0	0	0	1	0	0	0	1	1	1	0	1	0	1	1	1	1	1	1	3	3	3	3	3	2	2	4	3	1	1	3	4	1	4	3	4	2	3	1	1	4
24307	男	0	0	0	0	0	0	0	0	0	0	0	0	0	0	1	1	1	1	1	1	1	1	1	1	1	1	4	3	4	3	2	1	4	1	1	2	1	1	2	1	2	1	3	2	3	1	1	2
28254	男	0	0	1	0	1	0	0	0	0	0	0	0	0	0	0	0	0	0	1	0	0	0	0	0	0	0	1	1	1	2	1	1	1	3	3	1	1	1	3	3	1	1	1	1	1	1	1	3
16563	男	0	0	0	0	0	0	0	1	0	0	0	0	1	0	1	1	1	1	1	1	1	1	1	1	1	1	3	3	4	2	3	1	5	3	2	2	1	1	5	3	4	3	2	5	5	4	3	5
23921	女	0	0	0	0	0	0	0	0	0	0	0	0	0	0	1	0	0	0	0	0	0	0	1	0	0	0	3	2	2	2	1	1	3	1	2	1	1	1	3	2	2	2	3	2	2	1	1	3
27292	女	0	0	0	0	0	0	0	0	0	0	0	0	0	0	0	0	0	0	0	0	0	0	0	0	0	0	2	1	2	2	2	1	1	2	2	1	1	1	2	2	2	2	1	2	1	1	1	2
27648	女	1	0	0	0	0	0	0	0	0	0	0	0	0	0	0	0	0	0	0	0	0	0	0	0	0	0	1	1	2	1	1	1	1	1	1	1	1	1	1	1	1	1	1	1	1	1	1	1
24337	女	1	0	0	0	0	0	0	0	0	0	0	0	0	0	0	0	0	0	0	0	1	0	1	1	0	0	2	1	2	2	1	1	1	1	2	1	1	1	4	2	3	1	2	2	1	1	1	2
27933	女	0	0	0	0	0	0	0	0	0	0	0	0	0	0	0	0	0	0	0	0	0	0	0	0	0	0	2	1	2	2	1	1	1	1	1	1	1	1	1	1	1	1	1	1	1	1	1	2
24219	女	0	0	0	0	0	0	0	0	0	0	0	0	0	0	0	0	0	0	0	0	0	0	0	0	0	0	2	3	3	3	2	2	1	2	2	1	1	1	1	1	1	1	1	2	2	1	1	3
27951	女	1	0	0	0	0	0	0	0	0	0	0	0	0	0	1	0	1	1	1	1	0	1	0	0	1	1	2	2	2	3	2	2	2	2	2	1	1	2	3	2	2	1	2	2	2	2	1	3
24289	女	0	0	0	0	0	0	0	0	0	0	1	0	1	0	1	1	0	1	0	1	0	0	1	1	0	0	2	4	2	2	1	1	3	2	2	1	1	2	2	1	2	2	2	2	1	1	1	2
4548	女	1	0	0	0	0	0	0	0	0	0	0	0	0	0	1	1	1	1	1	1	1	1	1	1	1	0	3	3	4	3	3	3	3	3	4	2	1	1	1	3	3	4	3	3	3	4	2	4
27484	女	0	0	0	0	0	0	0	0	0	0	0	0	0	0	1	0	0	0	0	0	0	0	1	0	0	0	2	1	1	2	1	1	1	1	1	1	1	1	1	1	1	1	1	1	1	1	1	2
23715	女	1	0	0	0	0	0	0	0	0	0	0	0	0	0	1	1	1	1	1	1	0	0	1	1	1	1	2	3	1	2	3	2	3	1	1	1	1	2	1	2	1	1	2	1	1	1	1	1
16268	女	0	0	0	0	0	0	0	0	0	0	0	0	0	0	1	1	1	1	1	1	1	1	0	1	1	0	3	2	2	2	2	2	3	4	2	2	1	1	4	3	3	2	1	2	3	5	3	3
23806	女	0	0	0	0	0	0	0	0	0	0	0	0	0	0	1	0	0	1	0	1	0	0	0	1	0	0	1	2	2	3	3	2	3	4	2	1	1	1	1	1	2	3	3	2	1	1	1	1
23724	女	0	0	0	0	0	0	0	0	0	0	0	0	0	0	1	1	0	1	1	1	1	1	1	1	1	1	2	3	2	2	1	4	5	2	2	3	1	1	1	1	2	2	2	1	1	1	1	2
24372	女	0	0	0	0	1	0	0	0	0	0	0	0	0	0	1	0	0	0	0	0	0	0	0	0	0	0	1	2	2	2	1	1	1	2	2	1	1	1	1	1	1	3	2	1	1	1	1	2
27670	女	0	0	0	0	1	0	0	0	0	0	0	0	0	0	1	1	1	1	1	1	1	1	0	0	1	0	3	3	2	3	3	2	4	3	1	1	1	1	3	2	3	3	3	1	2	1	1	1
24340	女	0	0	0	0	1	0	0	1	0	0	0	0	0	0	1	0	1	1	0	0	0	0	1	0	0	0	1	1	2	3	2	1	1	1	2	3	4	4	4	3	2	1	3	2	3	4	2	3
23094	女	0	0	0	0	0	0	0	0	0	0	0	0	0	0	1	1	1	1	1	1	0	0	0	0	0	0	2	2	3	3	2	2	2	2	2	2	1	3	4	2	3	2	3	2	3	3	3	3
27246	女	0	0	0	0	0	0	0	0	0	0	0	0	0	0	1	0	0	0	0	0	0	0	0	0	0	0	2	2	3	3	2	1	1	1	2	1	1	1	1	2	2	1	1	1	2	1	1	2
19180	女	0	1	0	1	1	0	0	0	0	0	0	0	1	1	0	0	0	1	1	0	1	1	0	0	1	0	3	4	3	3	3	3	4	2	3	4	1	3	4	2	2	3	4	2	3	3	5	3
27572	女	0	0	0	0	1	0	0	0	0	0	0	0	0	0	1	0	0	0	0	0	0	0	0	0	0	0	2	1	3	1	1	1	1	2	3	1	1	1	1	1	1	3	2	2	2	1	1	3
24580	女	1	0	0	0	0	0	0	0	0	0	0	0	0	0	1	0	0	0	0	0	0	0	1	0	0	0	1	1	1	1	1	1	1	1	1	1	1	1	1	1	1	1	1	1	1	1	1	1
23017	女	0	0	0	0	0	0	0	0	0	0	0	0	0	0	1	0	1	1	0	0	0	1	0	0	0	0	1	1	2	3	1	1	1	1	2	1	1	1	1	1	2	1	1	1	2	1	1	2
27641	女	1	0	0	0	0	0	0	0	0	0	0	0	0	0	1	1	0	0	0	0	0	0	1	0	0	0	2	2	2	2	1	1	2	1	1	1	1	2	3	2	2	1	2	2	1	1	1	2
27926	女	0	0	0	0	0	0	0	0	0	0	0	0	0	0	1	1	0	1	1	1	0	0	0	0	0	0	2	2	1	1	2	1	1	1	1	1	1	1	1	1	1	1	1	1	1	1	1	1
28466	女	0	0	0	0	1	0	0	0	0	0	0	0	0	0	0	0	0	0	0	0	0	0	0	0	0	0	1	1	1	1	1	1	1	1	1	1	1	1	1	1	1	2	1	1	1	1	1	1
27692	女	0	0	0	0	0	0	0	0	0	0	0	0	0	0	1	1	0	0	1	1	1	1	1	1	1	0	1	1	1	2	1	1	1	2	1	1	1	1	1	1	1	1	1	1	1	1	1	1
27943	男	0	0	0	0	1	1	0	0	0	0	0	0	0	0	1	0	0	1	0	1	0	0	1	1	1	1	1	2	1	1	1	2	1	2	1	1	1	1	1	1	1	1	1	1	1	1	1	1
23095	男	0	0	0	0	0	0	0	1	0	0	0	0	0	0	1	1	0	0	0	0	0	0	0	0	0	1	2	3	3	3	4	1	1	2	2	1	1	1	1	2	3	1	2	1	2	1	1	1
18567	男	1	1	0	1	0	0	0	0	0	0	0	0	0	0	1	1	0	1	1	1	1	1	1	1	1	1	3	2	3	2	1	1	3	2	3	1	4	2	3	2	3	2	2	3	1	1	1	3
27623	男	0	0	0	0	0	0	0	0	0	0	0	0	0	0	1	0	1	1	1	1	1	0	1	1	0	0	3	2	2	2	2	2	2	2	2	2	1	2	3	2	2	2	2	1	2	1	1	2
28497	男	0	0	0	0	0	0	0	0	0	0	0	0	0	0	1	0	0	1	0	1	1	0	0	0	1	0	2	2	2	1	1	1	1	1	2	1	1	1	1	1	2	3	1	1	1	1	1	1
25578	男	0	0	0	0	0	0	0	1	0	0	0	0	0	0	0	1	0	1	1	1	1	0	1	1	1	1	2	3	4	3	2	1	1	1	2	1	1	1	2	3	2	2	2	3	3	3	3	3
23712	男	0	0	0	0	0	0	0	0	0	0	0	0	0	0	1	0	0	0	0	0	0	0	0	0	0	0	2	2	3	3	2	2	2	2	2	2	2	3	4	3	3	3	3	2	2	2	2	2
26192	男	0	0	0	0	0	0	0	0	0	0	0	0	0	0	1	0	1	1	1	0	1	0	0	0	0	0	2	2	2	2	2	1	2	3	2	2	1	4	1	2	4	3	4	2	4	3	2	5
19143	女	0	0	0	0	0	0	0	0	0	0	0	0	0	0	1	1	1	1	1	1	0	0	1	1	0	1	3	3	3	3	3	3	4	3	3	3	3	3	3	4	4	4	4	4	4	4	4	4
25828	女	0	0	1	0	0	0	0	0	0	0	0	0	0	0	1	0	0	1	0	0	1	0	0	1	1	1	3	2	3	3	2	3	1	3	5	2	1	1	2	2	3	3	2	2	1	3	1	5
23413	女	0	0	0	0	0	0	0	0	0	0	0	0	0	0	0	0	0	0	0	0	0	0	0	0	0	0	3	2	3	2	2	2	1	3	2	3	1	2	3	2	2	2	2	3	3	3	3	1
27657	女	1	0	0	0	0	0	0	0	0	0	0	0	0	0	0	0	0	0	0	0	0	0	0	0	0	0	2	1	1	1	1	1	1	1	1	1	1	1	3	1	1	1	1	1	1	1	1	1
27658	女	1	0	0	0	0	0	0	0	0	0	0	0	0	0	1	0	1	1	0	0	1	0	0	0	1	0	3	2	4	3	2	2	1	1	1	1	1	1	1	2	2	1	1	2	1	1	1	3
28079	女	0	0	0	0	0	0	0	0	0	0	0	0	0	0	0	0	0	1	0	0	0	0	0	0	0	0	2	2	1	2	1	2	3	2	2	2	1	1	1	2	2	2	1	1	1	1	1	2
23540	女	0	0	0	0	0	0	0	0	0	0	0	0	0	0	1	1	1	1	1	0	0	0	0	0	0	1	2	1	2	2	2	2	2	2	2	2	1	2	1	1	1	2	2	2	2	2	1	2
23747	女	0	0	0	0	0	0	0	0	0	0	0	0	0	1	0	1	0	0	1	0	1	0	1	1	1	0	2	1	2	3	3	3	3	3	3	3	2	3	4	2	3	3	3	3	4	4	4	3
18404	女	0	0	0	0	1	0	0	0	0	0	0	0	0	1	1	1	1	1	1	0	0	0	1	1	0	0	3	3	3	3	2	3	1	1	2	1	1	1	1	1	1	2	4	2	1	1	1	2
18812	女	0	0	1	0	1	0	0	0	0	0	1	0	0	0	1	1	0	1	1	0	1	0	1	0	1	1	2	1	2	2	3	2	5	3	3	2	1	3	5	1	2	5	3	1	1	1	1	2
27693	女	0	0	0	0	0	0	0	0	0	0	0	0	0	0	0	0	0	0	0	0	0	0	0	0	0	0	2	1	2	2	1	1	1	2	2	1	1	1	1	1	1	2	1	1	1	1	1	2
18653	女	0	0	0	0	1	0	0	1	0	1	0	0	0	1	1	1	1	1	1	1	1	1	1	1	1	0	3	3	3	3	3	2	4	5	3	3	1	3	1	1	1	2	3	1	1	1	1	3
27722	女	0	0	0	0	1	0	0	0	0	0	0	0	0	0	1	0	0	0	0	0	0	0	1	0	1	1	4	2	3	3	3	2	2	3	3	1	1	4	1	2	4	3	4	3	1	1	1	3
5175	女	0	0	0	0	0	0	0	0	0	0	0	0	0	0	1	1	1	1	1	1	1	1	1	1	0	1	2	3	3	3	2	1	1	2	3	1	1	1	1	1	2	2	1	1	1	1	1	3
27980	女	0	0	0	0	0	0	0	0	0	0	0	0	0	0	1	1	1	1	1	0	1	0	1	0	0	0	2	1	3	2	1	1	3	3	2	2	1	1	1	1	2	2	2	2	2	1	1	1
23748	女	0	0	0	0	0	0	0	0	0	0	0	0	0	0	1	0	1	1	1	1	0	0	1	1	1	1	4	3	3	4	2	2	2	4	3	3	3	4	4	2	3	3	3	2	4	3	3	4
27918	女	0	0	0	0	1	0	0	0	0	0	0	0	0	0	1	1	0	1	1	1	1	1	0	0	1	1	3	4	3	3	2	3	4	3	2	2	1	1	1	2	2	2	3	1	1	1	1	3
27871	女	0	0	0	0	1	0	0	0	0	0	0	0	0	0	0	0	0	0	0	0	0	0	0	0	0	0	3	2	2	2	1	2	2	2	2	1	1	1	2	2	2	2	2	2	3	2	2	2
23814	女	0	0	0	0	0	0	0	0	0	0	0	0	0	0	0	0	0	0	0	0	0	0	0	0	0	0	1	1	1	1	1	1	1	1	1	1	1	1	1	1	1	1	1	1	1	1	1	1
27752	女	0	1	0	0	1	0	0	0	0	0	0	0	0	0	0	0	0	0	0	0	0	0	0	0	0	0	1	1	2	1	1	1	1	1	2	1	1	1	1	1	1	2	1	1	1	1	1	1
23486	女	0	1	0	0	0	0	0	0	0	0	0	0	0	0	0	0	0	0	1	0	0	0	0	0	1	0	2	3	2	3	1	1	2	2	2	1	1	1	3	2	1	2	1	1	1	1	1	2
23534	女	1	0	0	0	0	0	0	0	0	0	0	1	0	0	0	0	0	0	0	0	0	0	1	1	0	0	2	1	2	1	1	1	1	1	1	1	1	1	1	1	1	1	1	1	1	1	1	2
23800	女	1	0	0	0	0	0	0	0	0	0	0	0	0	0	0	1	0	0	0	0	0	0	1	0	0	0	2	3	2	3	2	1	2	2	1	2	2	3	4	2	3	2	2	2	3	3	2	3
27895	女	1	0	0	0	0	0	0	0	0	0	0	0	0	0	1	0	1	0	0	0	0	0	0	0	0	0	2	1	3	3	1	1	1	1	2	1	1	1	1	1	3	2	3	1	1	1	1	1
23481	女	1	0	0	0	0	0	0	0	0	0	0	0	0	0	1	1	0	1	0	1	1	0	1	1	1	0	2	3	3	3	2	2	1	2	2	1	1	1	2	2	2	1	1	2	2	1	1	3
23742	女	0	0	0	0	1	0	0	0	0	0	0	0	0	0	1	1	1	1	1	1	1	1	1	1	1	1	2	2	3	3	2	2	3	3	2	2	3	3	3	2	2	3	2	3	2	1	2	3
23098	女	0	0	0	0	1	0	0	0	0	0	0	0	0	0	1	1	0	1	1	0	1	1	1	0	1	1	2	2	2	3	2	2	3	2	2	2	3	3	4	2	2	2	2	2	2	2	2	2
28499	女	0	0	0	0	0	0	0	0	0	0	0	0	0	0	1	0	0	0	0	0	0	0	1	0	0	0	2	2	2	2	2	2	2	3	3	2	1	1	2	3	3	4	1	2	2	2	2	3
25980	女	0	0	0	0	0	0	0	0	0	0	0	0	0	0	1	0	0	0	0	0	0	0	0	0	0	0	3	3	3	1	1	1	1	1	2	2	1	1	1	1	1	1	1	1	1	1	1	1
18876	女	0	0	0	0	0	0	0	0	0	0	0	0	0	0	1	1	0	1	1	1	1	0	0	1	1	1	2	2	2	2	2	3	2	1	3	3	1	3	1	2	3	3	1	1	1	1	1	4
27760	女	0	0	0	0	0	0	0	0	0	0	0	0	0	0	1	1	0	0	0	0	0	0	0	0	0	0	1	1	1	2	1	1	1	2	2	1	1	1	1	1	1	3	1	1	1	1	1	1
23751	女	0	0	0	0	0	0	0	0	0	0	0	0	0	0	0	0	0	0	0	0	0	0	0	0	0	0	2	2	2	2	1	2	2	2	2	2	2	2	2	2	2	2	2	2	2	3	3	3
18927	男	1	0	0	0	1	0	0	0	0	0	0	0	0	0	1	1	1	1	1	1	1	1	1	1	1	1	3	5	3	3	1	2	5	3	2	1	1	1	1	1	3	4	1	1	1	1	1	2
23741	男	0	0	0	0	1	0	0	0	0	0	0	0	0	0	0	0	0	0	0	0	0	0	1	0	0	0	1	1	1	1	1	1	1	1	1	1	1	1	1	1	1	3	1	1	1	1	1	2
23459	男	0	0	0	0	1	0	0	0	0	0	0	0	0	0	0	0	0	0	0	0	0	0	0	0	0	0	1	3	1	4	1	1	1	1	1	1	1	1	1	1	1	1	1	1	1	1	1	1
23613	男	0	0	0	0	1	0	0	0	0	0	0	0	0	0	0	0	0	0	0	0	0	0	0	0	0	0	2	2	3	2	1	2	2	2	3	2	4	4	4	2	2	3	3	2	3	4	2	2
22402	男	1	0	0	0	0	0	0	0	0	0	0	0	1	0	0	0	1	1	0	0	0	0	1	0	0	0	2	2	1	2	2	1	1	1	1	1	1	1	2	2	2	1	1	1	1	1	1	2
23749	男	0	0	0	0	1	0	0	0	0	0	0	0	1	0	1	1	0	1	0	0	1	0	0	0	0	1	1	2	3	1	1	2	1	2	4	1	1	1	1	1	1	4	2	1	1	1	1	5
28277	男	0	0	0	0	0	0	0	0	0	0	0	0	0	0	1	0	0	0	0	0	0	0	1	0	0	0	2	1	3	2	2	2	3	3	3	1	1	4	4	2	3	2	2	2	3	3	3	4
23754	男	1	0	0	0	0	0	0	0	0	0	0	0	0	0	1	0	0	1	0	1	1	0	1	0	0	0	1	1	4	3	4	3	1	3	4	1	1	1	1	2	3	2	1	1	2	1	1	3
27917	男	0	0	0	0	0	0	0	1	1	0	0	0	0	0	1	1	1	1	0	0	0	0	0	0	0	0	3	2	1	2	1	2	1	1	2	1	1	1	1	1	3	1	1	1	2	1	5	1
27761	男	1	0	0	0	0	0	0	0	0	0	0	0	0	0	0	0	0	1	0	0	0	0	1	0	1	0	2	2	3	3	2	2	2	2	2	3	1	3	4	3	2	1	1	1	3	3	1	2
27581	男	0	0	0	0	0	0	0	0	0	0	0	0	0	0	1	1	1	1	1	0	1	1	1	0	1	1	3	3	4	4	3	1	2	1	4	2	1	1	1	2	4	3	5	3	4	2	2	3
27916	男	0	0	0	0	0	0	0	0	0	0	0	0	0	0	0	0	0	0	0	0	0	0	0	0	0	0	2	2	2	2	2	1	2	1	2	1	1	1	2	2	2	2	1	2	2	1	1	3
23442	男	1	0	0	0	1	0	0	0	0	0	0	0	0	0	0	0	0	0	0	1	1	0	0	0	0	0	2	2	2	2	2	1	1	1	2	2	1	1	1	2	2	2	2	2	2	1	1	2
14810	女	1	0	0	0	0	0	0	1	0	0	0	0	0	0	1	1	1	1	1	1	1	1	1	1	1	1	2	4	2	1	3	1	1	4	3	2	1	1	1	2	2	2	3	1	2	4	2	3
26635	女	0	0	0	0	0	0	0	0	0	0	0	0	0	0	0	0	1	1	0	1	1	0	1	0	1	1	3	1	3	2	1	1	2	1	3	3	1	1	1	3	3	2	1	4	1	1	1	4
27728	女	0	0	0	0	0	0	0	0	0	0	0	0	0	0	1	0	0	1	0	1	0	0	0	0	0	0	2	2	2	2	2	2	3	3	3	3	2	2	3	2	2	3	3	3	3	2	2	2
27972	女	0	1	0	0	1	0	0	0	0	0	0	0	0	0	1	0	0	1	1	0	0	0	1	0	0	0	2	2	3	3	1	1	2	2	2	1	1	1	2	1	1	2	2	2	3	3	1	2
27999	女	1	0	0	0	0	0	0	0	0	0	0	0	0	0	1	0	1	0	0	0	0	0	0	0	0	0	1	1	1	1	1	1	1	1	2	1	1	1	1	1	1	1	1	1	1	1	1	1
27687	女	0	0	0	0	0	0	0	0	0	0	0	0	0	0	1	0	0	0	1	0	0	0	0	0	0	0	2	2	2	2	2	2	2	2	2	2	1	2	3	2	3	2	2	2	2	2	2	3
27701	女	0	0	0	0	0	0	0	0	0	0	1	0	0	0	0	0	1	1	1	0	0	0	1	0	1	0	2	2	2	3	1	1	3	2	3	1	1	2	1	2	2	3	4	2	2	1	1	2
27982	女	0	0	0	0	0	0	0	0	0	0	0	0	0	0	1	0	1	0	1	1	0	0	1	0	0	0	1	1	2	2	1	2	2	1	2	1	1	1	1	1	1	1	1	1	1	1	1	1
28295	女	0	0	0	0	0	0	0	0	0	0	0	0	0	0	1	0	0	0	0	0	0	0	0	0	0	0	2	2	1	1	1	1	1	1	1	1	1	1	1	1	1	1	1	1	1	1	1	1
27963	女	0	0	0	0	0	0	0	0	0	0	0	0	0	0	1	0	0	0	0	0	1	0	0	0	0	0	2	2	2	2	1	1	1	1	2	2	1	1	1	1	2	2	1	1	2	2	1	1
28267	女	0	0	0	0	0	0	0	0	0	0	0	0	0	0	0	1	0	0	0	0	0	0	0	0	0	1	2	2	1	2	2	2	1	1	1	1	1	2	2	2	2	1	1	1	1	1	1	2
28256	女	1	0	1	0	1	0	0	0	0	0	0	0	0	0	0	0	0	0	0	0	0	0	0	0	0	0	2	2	2	2	1	1	1	1	2	1	1	3	3	1	1	1	1	1	1	1	1	2
27427	女	0	0	0	0	0	0	0	0	0	0	0	0	0	0	1	0	1	0	0	0	1	1	1	0	0	1	2	1	3	2	1	1	1	1	2	1	1	3	4	3	4	2	2	3	1	1	1	3
27700	女	0	0	0	0	0	0	0	0	0	0	0	0	0	0	0	0	1	1	1	1	0	0	0	0	0	0	2	1	2	1	1	1	1	1	2	1	1	1	1	1	1	1	1	1	1	1	1	2
27624	女	0	0	0	0	0	0	0	0	0	0	0	0	0	0	0	0	0	0	0	0	0	0	0	0	0	0	2	2	2	2	2	2	2	2	2	2	2	2	2	2	2	2	2	2	1	1	1	1
27464	女	0	0	0	0	0	0	0	0	0	0	0	0	0	0	0	0	0	1	0	0	0	0	1	1	0	0	2	1	2	2	2	2	1	2	2	2	1	1	1	1	1	2	1	1	1	1	1	2
5343	女	0	0	0	0	0	0	0	0	0	0	0	0	0	0	1	0	1	1	1	1	1	1	1	1	1	1	2	4	3	2	1	1	1	2	4	1	1	2	1	1	2	2	2	2	1	1	1	4
28359	女	0	0	0	0	0	0	0	0	0	0	0	0	0	0	1	0	0	1	1	0	0	0	0	0	1	0	2	1	2	2	2	1	1	1	2	2	1	1	1	1	1	1	2	2	2	2	2	2
27558	女	0	0	0	0	0	0	0	0	0	0	0	0	0	0	1	0	0	1	0	0	0	0	0	0	0	0	2	2	2	2	1	1	1	2	2	2	1	2	5	2	1	2	2	2	2	1	1	2
27884	女	0	0	0	0	1	0	0	0	0	0	0	0	0	0	1	0	0	0	1	1	1	0	1	1	0	1	1	1	2	2	1	1	1	1	2	2	1	1	1	1	1	1	1	1	1	1	1	2
27988	女	0	0	0	0	0	0	0	0	0	0	0	0	0	0	0	0	0	0	0	0	0	0	0	0	0	0	1	1	2	1	1	2	2	1	1	1	1	1	1	1	1	1	1	1	2	1	1	1
28238	女	0	0	0	0	1	0	0	0	0	0	0	0	0	0	1	0	0	1	0	1	0	0	1	1	0	0	1	2	2	1	1	1	2	1	2	1	1	1	1	1	2	2	1	2	1	1	1	1
27996	女	0	0	0	0	0	0	0	0	0	0	0	0	0	0	0	1	1	0	1	0	0	1	1	0	0	0	2	1	3	2	2	3	2	1	3	3	1	1	1	1	2	1	1	1	1	1	2	4
26402	女	0	0	0	0	0	0	0	0	0	0	0	0	0	0	1	1	0	0	1	1	1	0	1	1	0	0	2	2	1	2	1	1	1	1	1	1	1	2	2	2	3	2	2	2	1	1	1	1
19168	女	1	0	0	0	0	1	0	0	0	0	0	0	0	0	1	1	0	1	1	0	1	0	1	0	1	0	3	4	3	3	1	2	1	3	3	1	2	1	4	3	3	3	3	1	3	3	3	3
27242	女	0	0	0	0	0	0	0	0	0	0	0	0	0	0	1	0	1	1	0	0	0	0	0	0	0	0	2	1	2	1	1	1	1	1	1	1	1	1	1	1	1	1	1	1	1	1	1	1
28260	女	1	1	1	0	0	0	0	0	0	0	1	0	0	0	1	0	1	0	0	0	0	0	1	0	0	0	2	1	2	2	1	3	1	1	2	1	1	1	2	1	3	1	1	1	1	1	1	3
27981	女	0	0	0	0	0	0	0	0	0	0	0	0	0	0	1	1	0	1	0	1	1	0	0	0	0	0	2	2	2	2	1	2	1	1	2	1	1	2	3	2	2	2	1	1	1	1	1	2
27483	女	0	0	0	0	1	0	0	0	0	0	0	0	0	0	1	0	0	0	0	0	0	0	1	0	0	0	1	1	3	2	2	2	2	3	2	2	1	1	1	1	1	4	1	2	2	1	1	2
27998	女	1	0	0	0	0	0	0	0	0	0	0	0	0	0	1	0	1	0	1	0	0	0	1	0	1	1	2	2	1	1	1	3	2	3	2	2	1	1	1	2	2	1	1	1	2	1	1	2
27710	女	0	0	0	0	0	0	0	0	0	0	0	0	0	0	1	0	0	0	0	0	0	0	1	0	0	0	2	1	3	1	1	1	2	1	3	1	1	1	1	2	3	1	1	1	2	1	1	3
27416	女	0	0	0	0	0	0	0	0	0	0	0	0	0	0	1	1	1	1	1	0	1	0	0	0	1	0	1	1	2	2	1	1	3	3	3	1	1	4	1	2	3	1	1	3	3	2	2	2
27552	女	0	0	0	0	0	0	0	0	0	0	0	0	0	0	1	1	0	1	1	0	1	0	1	1	1	0	2	3	4	4	2	2	1	5	3	1	1	1	1	1	2	2	5	3	4	4	2	5
27628	男	0	0	0	0	0	0	0	0	0	0	0	0	0	0	1	0	1	0	1	1	0	0	1	0	0	0	2	2	2	2	1	1	2	1	1	1	1	1	1	1	1	2	1	1	1	1	1	2
28661	男	0	0	0	0	0	0	0	0	0	0	0	0	0	0	0	0	0	0	0	0	0	0	0	0	1	0	2	3	1	2	2	1	1	1	1	1	3	4	5	1	2	2	2	1	2	2	2	1
27541	男	1	0	0	0	0	0	0	0	0	0	0	0	0	0	1	1	0	0	1	1	1	0	0	0	0	0	2	2	4	3	2	2	2	2	3	2	2	2	2	2	3	3	3	2	4	4	3	3
27706	男	1	0	0	0	0	0	0	0	0	0	0	0	0	0	1	1	1	0	0	0	1	0	1	0	0	0	2	2	2	2	1	1	1	1	2	1	1	1	1	1	1	1	1	1	1	1	1	2
27723	男	0	0	0	0	0	0	0	0	0	0	0	0	0	0	0	0	0	0	0	0	0	0	1	0	0	0	1	3	3	2	1	1	2	1	3	1	1	1	2	2	2	1	2	1	2	1	1	1
27633	男	0	0	0	0	0	0	0	0	0	0	0	0	0	0	0	0	1	1	0	0	0	1	0	1	0	0	2	2	2	2	2	2	3	2	3	1	1	1	1	2	3	3	4	2	2	1	1	3
27645	男	0	1	0	0	0	0	0	1	0	0	0	0	0	0	1	1	1	1	1	1	1	1	1	1	1	1	1	1	2	1	1	1	1	3	3	1	1	3	5	2	1	1	2	1	1	1	1	4
27575	男	0	1	0	0	0	0	0	0	0	0	0	0	0	0	0	0	0	0	0	0	0	0	1	0	0	0	2	1	2	1	1	1	2	1	2	1	1	2	2	1	1	2	1	1	1	2	1	1
15826	男	1	0	0	0	1	0	0	0	0	0	0	1	0	0	1	1	1	1	1	0	1	1	1	0	1	1	2	2	3	2	2	3	3	3	3	3	1	1	1	2	1	3	1	2	3	3	1	4
27627	男	1	0	0	0	0	0	0	0	0	0	0	0	0	0	1	0	0	0	1	0	0	0	1	0	0	0	2	2	2	1	1	1	1	1	2	1	1	2	1	1	1	2	1	1	1	1	1	2
27987	男	0	0	0	0	1	0	0	0	0	0	0	0	0	0	1	1	1	1	1	1	1	1	1	1	1	1	3	3	4	3	4	3	5	3	3	1	2	4	4	2	3	4	4	3	4	4	4	4
27481	男	1	0	0	0	0	0	0	0	0	0	0	0	0	0	1	1	0	0	0	0	0	0	0	0	0	0	2	2	2	2	1	1	1	1	1	1	1	1	1	1	1	1	1	1	1	1	1	1
27969	男	0	0	0	0	0	0	0	0	0	0	0	0	0	0	1	1	1	1	1	1	1	1	0	1	0	0	2	3	2	3	1	2	1	2	3	1	1	1	1	2	3	2	1	1	3	3	2	3
24055	女	0	0	0	0	0	0	0	0	0	0	0	0	0	0	1	0	0	1	0	0	0	0	0	0	0	0	2	1	2	2	2	2	3	1	1	1	1	1	1	1	2	1	1	1	1	1	1	1
24072	女	0	0	0	0	0	0	0	0	0	0	0	0	0	0	0	0	0	0	0	0	0	0	0	0	0	0	1	1	1	1	1	1	2	1	1	1	1	1	1	1	1	1	1	1	1	1	1	1
27936	女	0	0	0	0	0	0	0	0	0	0	0	0	0	0	0	0	1	0	0	1	0	0	1	0	1	0	1	1	2	1	1	1	1	1	1	1	1	1	1	1	1	1	1	1	1	1	1	1
28485	女	0	0	0	0	0	0	0	0	0	0	0	0	0	0	1	1	1	1	0	1	1	0	1	0	0	0	2	1	2	3	1	2	3	1	2	2	1	1	1	1	3	2	3	1	1	1	1	1
28774	女	0	0	0	0	0	0	0	0	0	0	0	0	0	0	1	1	0	0	1	0	0	0	1	0	0	0	1	2	2	2	2	1	2	1	1	1	1	1	1	1	2	1	1	1	1	1	1	1
24104	女	0	0	0	0	0	0	0	0	0	0	0	0	0	0	0	0	1	0	0	1	1	0	1	0	0	0	2	1	2	2	1	1	1	1	1	1	1	1	2	1	2	1	1	1	2	3	2	2
28349	女	1	0	0	0	0	0	0	0	0	0	0	0	0	0	0	0	0	0	0	0	0	0	1	0	0	0	2	1	1	1	1	1	1	1	1	1	1	1	1	1	1	1	1	1	1	1	1	1
24067	女	0	1	0	1	0	0	0	0	0	0	0	0	0	0	1	1	1	1	1	0	0	0	1	0	1	0	3	4	2	4	2	2	3	3	4	2	1	5	5	2	3	4	4	2	3	4	4	5
24079	女	1	0	0	0	0	0	0	0	0	0	0	0	0	0	1	0	1	1	1	0	0	0	1	0	0	0	2	1	2	1	1	2	1	1	1	1	1	2	1	1	1	1	1	1	1	1	1	1
24193	女	0	0	0	0	1	0	0	0	0	0	0	0	0	0	1	1	1	1	1	1	1	1	1	1	1	1	2	2	3	2	2	3	3	2	2	1	1	4	4	2	3	4	2	2	3	2	2	3
24097	女	0	0	0	0	0	0	0	0	0	0	0	0	0	0	1	0	0	0	0	0	0	1	1	0	0	0	2	1	3	2	2	2	2	2	2	1	3	4	5	2	3	3	3	1	2	1	2	1
27853	女	0	0	0	0	1	0	0	0	0	0	0	0	0	0	1	1	0	0	1	1	1	1	1	0	0	0	2	1	2	1	3	2	1	1	2	1	1	1	1	1	1	2	2	1	1	1	1	2
24063	女	0	1	0	1	0	0	0	0	0	0	1	0	1	1	1	0	0	0	1	0	0	0	1	0	1	0	3	1	2	1	1	1	1	1	2	1	1	1	3	1	1	2	1	1	1	1	1	1
27899	女	0	0	0	0	0	0	0	0	0	0	0	0	0	0	0	0	0	1	0	0	0	0	0	0	0	0	3	2	2	3	1	1	3	1	1	1	1	1	1	1	1	1	1	1	1	1	1	1
27620	女	0	0	0	0	0	0	0	0	0	0	0	0	0	0	1	1	0	0	0	0	0	0	0	0	1	1	2	1	1	1	1	1	1	1	1	1	1	1	1	1	2	1	1	2	1	1	1	2
23010	女	0	0	0	0	1	0	0	0	0	0	0	0	0	0	1	0	0	1	0	1	0	1	0	0	0	0	2	2	3	3	1	1	1	1	2	1	2	2	3	2	1	4	2	2	1	1	1	2
24108	女	0	0	0	0	0	0	0	0	0	0	0	0	0	0	1	1	0	1	0	1	1	0	1	0	1	0	2	2	2	1	1	2	2	1	2	1	1	1	1	1	2	1	1	2	1	1	1	1
4055	女	1	0	0	0	0	0	0	0	0	0	1	0	0	0	1	1	1	1	1	1	1	1	1	0	1	1	1	1	4	2	1	1	1	1	4	1	1	1	1	1	3	1	1	1	1	1	1	5
18957	女	1	0	0	0	0	0	0	0	0	0	0	0	0	0	0	0	1	1	0	0	0	0	1	0	0	0	2	2	2	2	1	1	1	1	2	1	1	1	1	1	2	1	2	2	1	1	1	2
28459	女	0	0	0	0	0	0	0	0	0	0	0	0	0	0	1	0	1	0	0	0	0	0	0	0	0	0	1	1	2	1	1	1	1	1	1	1	1	1	1	2	1	1	1	1	1	1	1	2
23120	女	0	0	0	0	1	0	0	0	0	0	0	0	0	0	1	0	1	1	0	1	1	1	1	1	0	1	2	2	2	2	3	2	2	1	2	2	2	2	3	2	2	2	3	2	2	3	2	2
27857	女	0	0	0	0	1	0	0	0	0	0	0	0	0	0	1	0	1	0	0	0	0	0	1	0	0	0	2	2	3	2	1	1	1	2	2	1	1	1	1	2	2	2	1	2	2	1	1	1
27733	女	0	0	0	0	0	0	0	0	0	0	0	0	0	0	0	0	0	0	0	0	0	0	0	0	0	0	3	3	2	2	2	2	2	2	2	1	3	3	5	2	2	2	3	3	3	3	2	2
4370	女	0	0	0	0	0	0	0	0	0	0	0	0	0	0	1	1	0	1	1	0	1	0	0	1	1	0	2	2	3	2	2	2	2	3	2	2	2	2	4	2	2	3	3	2	2	3	2	3
27868	女	0	0	0	0	0	0	0	0	0	0	0	0	0	0	0	1	0	1	0	0	1	0	1	0	0	0	2	2	2	2	1	1	1	2	2	1	2	1	2	1	2	1	1	1	1	1	1	2
27976	女	0	0	0	0	0	0	0	0	0	0	0	0	0	0	1	0	0	1	0	0	1	0	1	1	0	0	1	1	2	2	1	1	2	2	2	1	1	3	4	1	2	1	1	1	1	1	1	2
27892	女	0	0	0	0	0	0	0	0	0	0	0	0	0	0	1	0	0	0	0	0	1	0	1	0	0	0	3	3	3	3	2	2	1	3	3	1	1	3	1	2	2	2	2	2	1	1	1	2
23012	女	0	0	0	0	0	0	0	0	0	0	0	0	0	0	0	0	0	0	0	0	0	0	0	0	1	0	1	2	2	2	1	2	3	3	3	1	1	4	4	3	2	1	1	1	2	2	2	3
19032	男	1	0	0	0	0	0	0	0	0	0	0	0	0	0	1	0	1	0	1	0	0	0	0	0	0	0	2	2	2	2	1	2	2	2	2	2	2	1	2	2	2	2	2	2	2	2	2	2
23024	男	1	0	0	0	0	0	0	1	0	0	1	0	0	0	0	0	0	0	0	0	0	0	0	0	0	0	2	2	2	2	1	1	1	1	1	1	1	1	1	1	1	1	1	1	1	1	1	1
27864	男	0	0	0	0	0	0	0	0	0	0	0	0	0	0	1	0	0	0	0	0	1	0	0	0	0	0	2	3	3	2	2	1	1	1	1	1	1	1	1	1	2	1	1	1	1	1	1	3
28478	男	1	0	0	0	0	0	0	0	0	0	0	0	0	0	0	0	0	0	0	0	0	0	0	0	0	0	1	1	1	1	1	1	1	1	1	1	1	1	1	1	1	1	1	1	1	1	1	1
24656	男	1	1	0	0	0	0	0	0	0	0	0	0	0	0	0	0	0	0	0	0	0	0	0	0	0	0	1	2	2	2	1	1	1	1	2	2	1	2	3	3	3	2	3	2	2	2	2	2
27875	男	1	0	0	0	0	0	0	0	0	0	1	1	0	0	1	1	1	1	1	1	1	1	1	1	1	1	4	2	2	2	3	5	1	2	2	1	3	5	5	1	2	3	1	1	1	2	1	4
23081	男	1	0	0	0	1	0	0	0	0	0	0	0	0	0	0	0	0	0	1	1	1	0	1	1	1	0	1	1	2	1	1	1	1	1	1	1	1	1	1	1	1	1	1	1	1	1	1	1
24069	男	1	0	0	0	0	0	0	0	0	0	0	0	0	0	0	1	0	0	1	1	0	1	1	0	0	1	2	1	3	2	1	1	2	3	3	2	3	3	3	3	3	3	4	3	2	3	2	2
23904	男	0	0	0	0	0	0	0	0	1	0	0	0	0	0	0	0	1	1	0	0	0	0	1	0	1	0	2	2	3	3	1	2	2	1	1	1	1	5	5	1	2	2	2	1	1	1	1	1
28303	男	0	0	0	0	0	0	0	0	0	0	0	0	0	0	1	1	0	0	0	0	0	0	1	0	0	0	1	1	2	2	1	1	2	1	1	1	1	3	3	2	2	1	2	1	2	1	2	1
28102	男	0	1	1	0	0	0	0	0	0	0	0	0	0	0	1	0	0	0	0	0	0	0	0	0	1	0	1	2	2	1	1	2	1	1	1	1	1	1	1	1	2	2	2	1	1	1	1	1
27929	女	0	0	0	0	0	0	0	0	0	0	0	0	0	0	1	1	1	0	1	0	1	1	1	0	0	1	3	2	3	2	3	2	2	3	2	2	1	1	2	2	2	1	2	2	2	3	2	4
27422	女	0	0	0	0	1	0	0	0	0	0	0	0	0	0	0	0	0	0	0	1	0	0	1	0	0	0	1	1	3	1	1	1	1	1	1	1	1	1	1	1	3	3	4	3	1	1	1	2
28586	女	0	0	0	0	0	0	0	0	0	0	0	0	0	0	1	0	1	1	0	0	1	1	1	1	0	0	4	1	1	2	1	1	3	1	1	1	1	1	1	2	2	2	1	1	1	1	1	1
27625	女	0	0	0	0	0	0	0	0	0	0	0	0	0	0	1	0	1	0	1	0	0	0	1	0	0	0	3	2	3	3	2	3	2	2	2	2	2	2	3	3	3	2	3	2	3	2	2	2
27559	女	0	0	0	0	0	0	0	0	0	0	0	0	0	0	1	0	0	1	1	0	0	1	1	0	0	0	2	3	2	2	1	1	2	2	2	2	1	1	1	2	2	2	1	2	2	1	1	1
24189	女	1	0	0	0	0	0	0	0	0	0	0	0	0	0	1	0	0	0	1	0	0	0	0	0	0	0	2	2	2	2	1	2	1	1	2	1	1	1	1	1	2	2	1	1	1	1	1	1
28580	女	0	0	0	0	1	1	1	0	0	0	0	1	0	0	1	1	1	1	1	1	1	1	1	1	1	1	3	2	2	2	1	2	2	3	2	1	1	2	2	2	2	3	2	2	3	3	2	2
27893	女	1	0	0	0	0	0	0	0	0	0	0	0	0	0	0	0	0	0	0	0	0	0	1	0	0	0	1	1	2	2	1	1	1	1	1	1	1	1	1	1	1	1	1	2	1	1	1	2
27392	女	0	0	0	0	0	0	0	0	0	0	0	0	0	0	1	0	1	1	0	0	0	0	0	0	0	0	1	1	1	1	1	1	1	1	1	1	1	1	1	1	1	1	1	1	2	1	1	2
27858	女	0	0	0	0	0	0	0	0	0	0	0	0	0	0	0	0	1	1	0	0	0	0	1	0	0	0	2	3	3	2	1	1	1	1	3	1	1	1	1	1	2	1	1	2	1	1	1	1
25315	女	0	0	0	0	0	0	0	1	0	0	0	0	0	0	0	0	0	0	0	0	0	0	1	0	0	0	1	1	1	1	1	1	1	1	1	1	1	1	1	1	1	1	1	1	1	1	1	1
18439	女	0	0	0	0	0	0	0	0	0	0	0	0	0	1	1	1	0	1	0	0	1	1	1	1	0	0	4	3	5	4	3	3	4	2	5	1	1	1	1	1	3	2	2	3	5	4	4	3
27942	女	0	0	0	0	1	0	0	0	0	0	0	0	0	0	1	0	1	0	0	0	0	0	1	0	0	0	2	1	3	2	1	1	1	1	2	1	1	4	1	3	1	3	2	1	1	1	1	4
26903	女	0	0	0	0	1	0	0	0	0	0	0	0	0	0	0	0	0	0	0	0	1	0	0	0	0	0	2	2	2	2	1	1	1	1	2	1	1	1	1	1	2	2	2	2	3	3	2	2
28236	女	0	0	0	0	1	0	0	0	0	0	0	0	0	0	1	0	0	1	0	1	0	1	1	0	0	0	2	1	2	2	1	2	2	1	2	1	1	1	1	1	2	2	1	2	1	2	2	3
27321	女	0	0	0	0	1	0	0	0	0	0	0	0	0	0	0	0	0	0	0	0	0	0	0	0	0	0	1	1	2	1	1	1	1	1	2	1	1	2	2	2	1	2	1	1	2	1	1	2
27935	女	0	0	0	0	1	0	1	0	0	0	1	0	0	0	0	0	0	1	0	0	0	0	0	0	0	0	2	1	2	3	3	1	3	1	2	1	1	2	3	2	2	2	2	2	2	1	1	3
27617	女	0	0	0	0	1	0	0	0	0	0	0	0	0	0	1	1	0	0	0	0	0	0	1	0	0	0	2	2	3	1	1	1	1	1	1	1	1	1	1	1	1	2	1	2	1	1	1	1
4051	女	0	0	0	0	0	0	0	0	0	0	0	0	0	0	1	1	0	0	1	0	1	0	1	1	1	1	3	3	3	2	1	3	1	1	2	1	1	1	1	1	3	2	1	1	1	1	1	1
23691	女	1	0	0	0	1	0	0	0	0	0	0	0	0	0	0	0	1	0	0	0	0	0	0	0	0	0	1	1	1	1	1	1	1	1	1	1	1	1	1	1	1	1	1	1	1	1	1	1
28561	女	0	0	0	0	0	0	0	0	0	0	0	0	0	0	0	0	0	1	0	0	0	0	0	0	0	0	2	1	2	2	2	1	1	1	2	1	1	1	1	2	2	2	2	2	2	1	1	1
23688	女	0	0	0	0	1	0	0	0	0	0	0	0	0	0	1	0	0	1	0	0	0	0	0	1	0	0	3	3	3	3	2	2	2	2	2	2	1	2	3	3	3	2	2	2	3	3	3	3
27642	女	0	0	0	0	0	0	0	0	0	0	0	0	0	0	1	0	0	0	1	1	0	0	0	0	1	1	1	1	1	2	2	1	1	1	1	1	1	1	1	1	1	1	1	1	1	1	1	1
27993	女	0	0	0	0	0	0	0	0	0	0	0	0	0	0	0	1	0	1	0	0	0	0	1	0	0	0	2	1	2	2	1	1	2	1	1	1	1	1	1	2	2	1	1	2	2	1	1	1
24185	女	1	0	0	0	0	0	0	0	0	0	0	0	0	0	0	0	0	1	0	0	0	0	0	0	0	0	1	1	2	1	2	1	1	1	1	1	1	1	1	1	1	1	1	1	1	1	1	1
23417	女	0	0	0	0	1	0	0	0	0	0	0	0	0	0	1	0	0	0	0	0	0	0	0	0	0	0	1	1	1	2	1	1	1	2	2	1	1	1	3	1	1	2	1	1	1	1	1	3
27859	女	0	0	0	0	0	0	0	0	0	0	0	0	0	0	1	1	0	0	0	0	0	0	0	0	0	0	2	1	1	1	1	1	1	2	2	2	1	1	1	1	2	2	1	1	1	1	1	2
23264	女	0	0	1	0	0	0	0	0	0	0	0	0	0	0	1	0	0	0	0	0	0	0	0	0	0	0	2	2	1	1	1	1	1	1	1	1	1	1	2	1	1	1	1	1	1	1	1	1
27920	女	0	0	0	0	0	0	0	0	0	0	0	0	0	0	1	0	1	0	0	0	1	0	0	0	1	0	1	1	3	2	1	1	1	1	1	1	1	1	1	1	1	1	1	1	1	1	1	1
23270	女	1	0	0	0	0	0	0	0	0	0	0	0	0	0	1	0	1	0	0	0	0	0	0	0	0	0	2	1	1	1	2	1	4	1	1	1	1	1	1	1	1	1	1	1	1	1	1	1
23597	男	0	0	0	0	0	0	0	0	0	0	0	0	0	0	1	1	1	1	1	1	1	1	0	1	1	0	2	2	3	2	1	1	1	2	1	1	1	1	1	1	2	1	1	1	1	1	1	1
23217	男	0	0	0	0	0	0	0	0	0	0	0	0	0	0	0	0	0	0	0	0	0	0	0	0	0	0	2	2	2	2	2	1	1	2	2	2	1	1	1	2	2	1	1	2	2	1	1	2
26467	男	0	0	0	0	1	0	0	0	0	0	0	0	0	1	1	1	1	1	1	1	1	0	1	1	0	1	2	2	2	3	1	1	1	1	2	1	1	1	1	3	3	4	3	1	3	1	2	1
27221	男	0	0	0	0	0	0	0	0	0	0	0	0	0	0	1	0	0	1	0	1	1	0	1	1	1	1	3	3	3	3	3	3	4	3	3	3	3	4	5	3	3	3	4	2	4	3	3	5
28533	男	1	0	0	0	0	0	0	0	0	0	0	0	0	0	0	0	0	0	0	0	0	0	0	0	0	0	1	1	1	1	1	1	1	1	1	1	1	1	1	1	1	1	1	1	1	1	1	1
28212	男	0	0	0	0	0	0	0	0	0	0	0	0	0	0	0	0	0	0	0	0	0	0	0	0	0	0	2	2	2	2	1	1	1	1	1	1	1	1	1	1	1	2	1	1	1	1	1	1
28455	男	1	0	0	0	0	0	0	0	0	0	0	0	0	0	1	1	1	1	0	0	0	0	1	0	0	0	3	3	3	2	2	3	3	3	3	3	4	4	4	3	3	3	4	3	3	3	3	3
23699	男	0	0	0	0	0	1	1	0	0	1	0	0	0	0	1	1	0	1	0	1	1	0	0	0	0	0	1	1	1	1	1	1	1	1	1	1	1	1	1	1	1	1	1	1	1	1	1	1
27210	男	1	0	0	0	0	0	0	0	0	0	0	0	0	0	0	0	0	0	0	0	0	0	1	0	0	0	2	1	2	2	1	1	1	1	1	1	1	1	1	2	2	1	1	1	1	1	1	1
23711	男	1	0	0	0	0	0	0	0	0	0	0	0	0	0	0	0	0	0	0	0	0	0	0	0	0	0	1	1	2	1	1	1	1	1	2	1	1	1	1	1	1	1	1	1	1	1	1	2
26289	男	0	0	0	0	0	0	0	0	0	0	0	0	0	0	1	0	0	0	0	0	0	0	0	0	0	0	3	1	2	2	1	2	1	1	2	1	1	2	4	2	2	2	1	2	2	1	1	3
27769	女	0	0	0	0	0	0	0	0	0	0	0	0	0	0	1	1	1	0	0	0	0	0	1	0	0	0	2	1	2	2	1	2	2	2	2	2	1	2	4	3	2	3	2	3	3	2	1	3
4418	女	0	0	0	0	0	0	0	0	0	0	0	0	0	1	1	1	0	1	1	0	1	1	1	1	1	1	1	3	2	3	2	2	3	1	3	1	1	1	1	1	2	1	1	1	1	1	1	4
3705	女	0	0	0	0	0	0	0	0	0	0	0	0	0	1	1	0	1	0	0	0	0	1	1	1	1	0	2	2	3	2	3	1	1	2	2	2	1	1	1	2	2	3	2	2	2	1	1	2
24233	女	0	0	0	0	0	0	0	0	0	0	0	0	0	0	0	0	1	0	1	1	1	0	1	0	0	0	2	1	2	2	2	1	2	1	2	1	1	1	2	2	3	1	1	2	3	3	3	3
27748	女	0	0	0	0	0	0	0	0	0	0	0	0	0	0	1	1	1	1	0	0	0	0	1	0	0	1	2	1	3	2	1	1	2	2	2	1	1	1	1	2	2	2	1	1	2	3	4	4
4421	女	0	0	0	0	0	0	0	0	0	0	0	0	0	0	1	0	0	0	0	0	0	0	0	0	1	0	2	1	2	1	2	2	1	1	1	1	1	1	1	1	2	1	1	1	2	1	1	2
24083	女	0	0	0	0	0	0	0	0	0	0	0	0	0	0	1	1	0	1	0	1	0	0	0	0	1	1	1	1	3	1	1	1	1	1	2	1	1	1	1	2	1	3	1	1	1	1	1	3
27757	女	0	0	0	0	0	0	0	0	0	0	0	0	0	0	1	0	0	1	0	0	0	0	1	0	0	0	1	1	2	2	1	1	2	1	2	1	1	1	1	1	1	1	1	1	1	1	1	2
23697	女	0	0	0	0	0	0	0	0	0	0	0	0	0	0	1	0	1	0	0	0	0	0	0	0	0	0	2	1	2	1	2	2	1	1	2	2	3	4	4	2	2	2	1	1	1	2	2	2
27470	女	0	0	0	0	0	0	0	0	0	0	0	0	0	0	1	0	1	1	1	0	1	0	1	0	0	0	2	1	3	3	2	2	1	3	2	1	1	1	1	1	2	1	1	2	2	1	1	1
18918	女	0	0	1	0	1	1	0	0	0	0	0	0	0	0	1	0	0	1	0	1	0	0	1	0	1	0	2	2	3	4	2	3	2	3	3	5	1	4	5	4	3	3	2	4	5	5	2	4
23718	女	0	1	0	1	1	0	1	0	0	0	0	0	1	0	1	1	1	0	0	1	0	0	1	0	1	0	1	1	5	2	1	1	1	1	1	1	1	1	1	1	1	5	2	1	1	1	1	3
4436	女	1	0	0	0	0	0	0	0	0	0	0	0	0	0	1	1	0	0	1	0	1	0	1	1	1	1	2	3	4	3	3	3	2	2	3	2	1	1	3	2	3	2	2	2	2	1	2	2
24251	女	0	0	0	0	0	0	0	0	0	0	0	1	0	0	1	1	1	0	1	1	0	1	0	1	0	0	2	3	1	3	3	2	1	1	1	1	1	1	1	2	3	3	3	1	2	1	1	2
24231	女	0	0	0	0	0	0	0	0	0	0	0	0	0	0	0	0	0	0	0	0	0	0	0	0	0	0	1	1	1	1	1	1	1	1	1	1	1	1	1	1	1	1	1	1	1	1	1	1
27780	女	0	0	0	0	0	0	0	0	0	0	0	0	0	0	0	1	0	0	1	0	0	0	1	1	0	0	2	1	3	1	3	2	1	2	3	1	1	3	2	2	2	3	1	2	1	1	1	3
27423	女	0	1	0	0	0	0	0	1	0	0	0	0	0	0	1	1	1	1	0	1	1	0	1	1	1	1	3	4	2	2	2	1	1	1	1	1	1	1	2	1	2	1	4	1	2	1	1	2
18613	女	1	0	0	0	0	0	0	0	0	0	0	0	0	0	1	1	1	0	1	0	1	0	1	0	0	0	2	2	2	2	4	2	1	2	2	2	2	5	5	2	2	3	2	2	3	1	2	3
28776	女	1	0	0	0	0	0	0	0	0	0	0	0	0	0	1	0	0	0	0	0	0	0	0	1	1	0	2	1	2	1	1	1	2	1	1	1	1	1	1	1	1	1	1	1	1	1	1	1
23716	女	0	0	0	0	0	0	0	0	0	0	0	0	0	0	0	0	0	1	0	0	0	0	0	0	0	0	1	1	2	1	1	1	1	2	2	1	1	1	1	1	1	1	1	2	1	1	1	2
25057	女	0	1	0	0	1	0	0	0	0	0	0	0	0	0	0	0	0	1	0	0	1	1	1	1	1	1	2	2	3	2	1	2	3	1	1	1	1	1	1	1	2	3	3	1	1	1	1	1
24829	女	0	1	0	0	0	0	0	0	0	0	0	0	0	0	1	0	1	1	0	0	1	1	1	0	0	1	2	1	2	3	1	1	1	1	1	1	1	1	4	1	2	3	2	2	3	1	1	3
28795	女	0	0	0	0	1	0	0	0	0	0	0	0	0	0	1	1	1	1	1	0	1	0	1	1	1	1	2	2	1	3	2	1	4	1	1	2	1	2	2	1	2	3	2	1	1	1	1	2
23679	女	0	0	0	0	0	0	0	0	0	0	0	0	0	0	0	0	0	0	0	0	0	0	0	0	0	0	1	1	1	1	1	1	1	1	1	1	1	1	1	2	1	1	1	1	1	1	1	1
28310	女	0	0	0	0	0	0	0	0	0	0	0	0	0	0	0	0	1	0	0	0	0	0	0	0	0	0	1	1	2	2	2	1	1	1	1	1	1	1	1	2	1	1	1	1	1	1	1	1
23903	女	0	0	0	0	0	0	0	0	0	0	0	0	0	0	1	0	0	0	0	1	0	0	1	0	0	0	2	2	2	2	1	1	1	1	1	1	1	1	1	2	2	1	1	1	2	1	1	2
23431	女	0	0	0	0	0	0	0	0	0	0	0	0	0	0	0	0	0	0	0	0	0	0	0	0	0	0	2	1	1	1	1	1	1	1	1	1	1	1	1	1	1	1	1	1	1	1	1	1
27849	女	1	0	0	0	0	0	0	0	0	0	0	0	0	0	0	0	1	1	0	0	0	0	0	0	0	0	2	1	2	1	2	1	1	1	1	1	1	1	2	2	2	1	1	1	1	1	1	1
3907	女	1	0	0	0	1	0	0	0	0	0	0	0	0	0	1	1	1	1	1	1	1	1	1	1	1	1	4	4	3	3	3	4	3	3	4	4	1	1	1	2	2	4	3	3	4	4	2	5
27759	女	0	0	0	0	0	0	0	0	0	0	0	0	0	0	1	1	1	1	0	0	0	0	1	0	0	0	2	1	2	2	1	1	2	2	2	1	2	3	3	2	2	2	1	1	2	2	1	2
27773	女	0	0	0	0	0	0	0	0	0	0	0	0	0	0	1	0	0	0	0	1	0	1	1	0	0	0	2	2	3	3	1	1	1	1	3	3	1	1	3	1	3	1	1	3	1	1	1	3
25188	女	0	0	0	0	0	0	0	0	0	0	0	0	0	0	1	0	1	1	0	0	1	1	0	1	0	0	2	3	3	2	4	1	2	1	2	1	1	1	3	2	2	1	2	2	3	1	2	3
28227	男	0	0	0	0	0	0	0	0	0	0	0	0	0	0	1	1	1	1	1	1	1	0	1	1	0	0	1	1	3	2	3	2	2	1	3	1	1	1	1	1	2	1	1	1	2	1	1	1
25559	男	0	0	0	0	0	0	0	0	0	0	0	0	0	0	0	0	0	1	0	0	0	0	0	0	0	1	2	1	3	1	1	1	3	1	3	1	1	1	1	2	2	2	1	2	2	1	1	3
27794	男	1	0	0	0	0	0	0	0	0	0	0	0	0	0	0	0	0	0	0	0	0	0	0	0	0	0	2	1	2	2	1	1	1	1	2	1	1	1	1	2	2	1	1	1	2	1	1	1
25603	男	1	0	0	0	0	0	0	0	0	0	0	0	0	0	0	0	0	0	0	1	0	0	0	0	1	0	2	1	1	1	1	1	1	1	1	1	1	1	1	1	1	1	1	1	1	1	1	1
23626	男	0	0	0	0	0	0	0	0	0	0	0	0	0	0	0	1	0	0	1	0	0	0	1	0	0	0	2	1	2	2	1	2	2	2	2	1	1	3	3	2	2	1	1	1	2	3	1	2
27974	男	1	0	0	0	0	0	0	0	0	0	0	0	0	0	1	0	1	1	1	0	1	0	0	0	0	0	3	3	1	2	2	3	3	4	4	1	1	3	3	2	3	1	2	3	4	3	1	2
26070	男	0	0	0	0	1	0	0	0	0	0	0	0	0	0	1	1	1	1	1	1	1	0	0	0	1	0	2	4	3	3	2	2	2	4	2	1	2	2	4	4	4	3	1	2	4	4	3	4
15402	女	0	0	0	0	0	0	0	0	0	0	0	0	0	1	1	1	0	1	1	1	0	0	1	1	0	1	2	2	2	3	3	3	2	2	3	2	1	1	2	2	3	2	3	3	3	1	1	3
15892	女	0	0	0	0	0	0	0	0	0	0	0	0	0	0	1	1	1	1	1	1	1	1	1	1	1	1	2	3	3	3	3	2	3	2	3	2	1	1	1	2	3	2	3	2	3	3	3	3
15919	女	0	0	0	0	0	0	0	0	0	0	0	0	0	0	1	0	0	0	0	1	1	0	1	0	0	0	3	3	2	2	2	3	2	2	2	3	1	3	3	2	3	3	4	1	2	2	2	2
24894	女	0	0	0	0	1	0	0	0	0	0	0	0	1	0	1	0	0	0	0	0	0	0	1	0	0	0	2	1	2	2	2	1	2	2	2	1	1	1	1	1	1	2	1	1	1	1	1	1
25032	女	0	0	0	0	1	0	0	0	0	0	0	0	0	0	0	1	0	1	0	1	1	0	0	0	1	0	2	1	3	1	1	1	1	1	1	1	1	1	1	1	2	1	1	1	1	1	1	1
25131	女	0	0	0	0	0	0	0	0	0	0	0	0	0	0	0	0	0	1	0	0	0	0	1	0	0	0	2	1	3	2	3	2	1	3	2	1	1	1	2	1	2	1	2	2	2	3	2	3
25106	女	1	0	0	0	0	0	0	0	0	0	0	0	0	0	0	0	0	0	0	0	0	0	1	0	0	0	2	1	2	2	1	1	1	1	2	1	1	1	1	2	2	1	1	2	1	1	1	2
27851	女	0	0	0	0	0	0	0	0	0	0	0	1	0	0	0	0	1	0	0	1	1	0	1	0	0	0	2	1	2	2	2	2	2	1	1	2	1	1	2	1	1	1	2	1	1	1	1	1
25173	女	1	0	0	0	0	0	0	0	0	0	0	0	0	0	0	0	0	1	0	0	0	0	0	0	0	0	2	2	1	1	1	1	1	1	1	1	1	1	1	2	1	1	1	1	1	1	1	1
25121	女	1	0	0	0	0	0	0	0	0	0	0	0	0	0	1	0	0	1	0	0	0	0	0	0	0	0	2	2	2	2	1	1	1	1	2	1	1	1	1	1	1	1	1	1	1	1	1	2
24895	女	1	0	0	0	0	0	0	0	0	0	0	0	0	0	0	0	1	0	0	1	0	0	1	0	1	1	3	3	3	3	2	2	2	2	3	1	1	1	3	3	3	1	3	1	3	1	1	4
24740	女	0	0	0	0	1	0	0	0	0	0	1	0	0	0	1	1	0	1	0	0	0	0	1	0	0	0	2	2	3	2	1	2	1	2	3	2	1	1	1	1	2	3	2	2	3	3	2	3
18922	女	0	0	0	0	1	0	0	0	0	0	0	0	0	0	1	1	1	1	1	1	1	0	1	1	1	1	3	3	3	3	3	2	2	4	3	3	1	3	1	3	3	3	3	3	3	3	4	4
25132	女	0	0	0	0	0	0	0	0	0	0	0	0	0	0	1	0	1	1	1	1	1	0	0	1	0	1	5	2	2	3	1	1	1	1	1	1	1	2	3	5	5	3	3	3	3	1	1	1
24752	女	0	0	0	0	0	0	0	0	0	0	0	0	0	0	0	0	0	0	0	1	0	0	1	0	1	1	1	1	2	1	1	2	1	2	1	1	1	2	3	1	1	3	1	1	1	2	1	2
25199	女	0	0	0	0	0	0	0	0	0	0	0	0	0	0	0	0	1	1	0	0	0	0	0	0	1	1	2	2	2	3	1	1	1	4	1	1	1	1	3	2	2	1	4	1	1	1	1	2
24909	女	0	0	0	0	0	0	0	0	0	0	1	0	0	0	0	0	0	0	0	0	0	0	0	0	0	0	2	3	2	1	1	1	1	3	3	3	2	2	3	1	3	1	2	1	2	1	1	3
25056	女	0	0	0	0	0	0	0	0	0	0	0	0	0	0	1	1	0	1	1	0	0	0	1	0	0	1	2	2	2	2	2	2	2	3	2	2	1	1	1	1	2	1	2	2	3	3	2	3
25118	女	0	0	0	0	1	0	0	0	0	0	1	1	0	0	0	0	0	1	0	0	0	0	0	0	0	0	2	1	3	3	2	1	2	2	2	1	1	2	3	4	3	3	1	2	1	2	1	3
25028	女	0	0	0	0	1	0	0	0	0	0	0	0	0	0	1	0	0	0	1	0	0	0	0	0	0	0	3	1	3	1	3	1	1	2	3	1	1	1	1	1	1	1	3	1	1	1	1	1
25126	女	0	0	0	0	0	0	0	0	0	0	1	0	0	0	1	0	1	1	1	0	0	1	0	0	1	0	2	2	3	3	2	2	1	2	2	2	2	2	3	2	3	3	2	2	3	2	2	3
25158	女	0	0	0	0	0	0	0	0	0	0	0	0	0	0	1	0	0	1	0	1	0	1	0	1	0	1	1	1	1	2	2	1	1	1	3	1	1	1	1	1	1	1	1	1	1	1	1	1
24869	男	0	0	0	0	1	0	0	0	0	0	0	0	0	0	1	1	0	1	0	0	1	0	1	0	1	0	2	2	2	2	2	2	2	2	2	2	2	2	2	2	2	2	2	2	2	2	2	2
25077	男	0	0	0	0	0	0	0	0	0	1	0	0	0	0	1	0	0	0	1	0	0	0	1	0	0	0	2	2	2	1	1	1	1	1	1	1	1	1	1	1	1	1	1	1	1	1	1	1
24745	男	0	0	0	0	0	0	0	0	0	0	1	0	0	0	0	0	0	0	0	1	0	0	0	0	0	0	2	2	1	1	1	1	1	1	2	1	2	1	1	1	2	1	1	1	2	2	3	2
25128	男	0	0	0	0	0	0	0	0	0	0	0	0	0	0	0	0	0	0	0	0	0	0	1	0	1	0	2	3	2	2	1	1	1	1	1	1	1	1	1	1	1	1	2	1	2	2	1	2
23851	男	1	0	0	0	0	0	0	0	0	0	0	0	0	0	1	1	1	1	1	1	1	0	1	0	0	0	3	3	4	2	1	1	1	1	1	1	1	1	1	1	4	1	2	1	1	1	1	1
24168	男	0	0	0	0	0	0	0	0	0	0	0	0	0	0	1	0	0	0	0	1	0	0	0	0	0	0	2	2	2	2	2	3	1	2	2	1	1	1	1	1	1	2	2	1	1	1	1	2
24019	男	0	0	0	0	0	0	0	0	1	0	0	0	0	0	0	0	0	1	0	0	0	0	0	0	0	0	2	1	2	2	1	1	1	2	2	2	3	3	3	1	3	2	3	1	2	3	1	2
25035	男	1	0	0	0	0	0	0	0	0	0	0	0	0	0	1	1	0	0	0	0	0	0	0	0	0	0	1	1	1	1	1	1	1	1	1	1	1	1	1	1	1	1	1	1	1	1	1	1
24748	男	0	0	0	0	0	0	0	0	0	0	0	0	0	0	1	0	0	1	1	0	1	1	0	0	1	0	2	2	2	2	1	1	1	3	2	2	1	3	5	3	2	3	1	1	2	2	4	3
23730	男	0	0	0	0	0	0	0	0	0	0	1	0	0	0	1	1	0	1	1	0	0	0	0	0	0	0	2	2	1	3	1	2	1	1	1	1	1	1	1	1	2	1	1	1	2	3	1	2
24417	女	0	0	0	0	0	0	0	0	0	0	0	0	0	0	1	0	0	1	1	1	0	0	0	0	0	0	1	1	1	1	1	2	1	2	2	1	1	2	1	2	2	1	2	2	2	2	2	2
28454	女	1	0	0	0	0	0	0	0	0	0	0	0	0	0	0	0	0	0	0	0	0	0	0	0	0	0	2	1	2	2	1	2	1	1	2	1	1	1	1	2	2	1	2	2	2	1	1	2
24407	女	1	0	0	0	0	0	0	0	0	0	0	0	0	0	0	0	0	0	0	0	0	0	1	0	0	0	2	1	2	1	1	2	1	1	1	1	1	1	1	1	1	1	1	1	1	1	1	1
24787	女	0	0	0	0	0	0	0	0	0	0	0	0	0	0	0	1	0	0	0	0	1	0	1	0	1	0	2	2	2	2	1	1	2	1	2	1	1	1	1	1	2	1	1	1	1	1	1	2
27836	女	0	1	0	0	0	0	0	0	0	0	0	0	0	0	0	0	1	0	0	0	0	0	0	0	0	0	2	3	3	3	2	1	1	1	1	1	1	1	1	2	2	3	3	2	1	2	1	2
28507	女	0	1	0	0	0	0	0	0	0	0	0	0	0	0	1	1	1	1	1	1	1	1	1	1	1	1	2	1	3	2	2	1	3	2	2	1	1	4	5	3	2	3	3	2	2	2	2	3
18258	女	1	0	0	0	1	0	0	0	0	1	0	0	1	0	1	1	1	0	1	0	0	0	0	0	1	0	2	2	2	2	1	2	2	1	1	1	1	3	4	2	1	1	3	1	2	1	1	1
28559	女	0	0	0	0	0	0	0	0	0	0	0	0	0	0	1	0	0	1	0	1	0	0	0	0	0	0	2	2	2	3	1	1	3	2	3	1	1	2	4	2	3	2	3	2	4	3	2	3
28763	女	0	0	0	0	0	0	0	0	0	0	0	0	0	0	0	0	0	0	0	0	0	0	0	0	0	0	1	2	2	2	2	2	1	1	2	1	1	2	2	2	2	1	1	1	2	1	1	2
18639	女	0	0	0	0	0	0	0	0	0	0	0	0	0	0	1	1	0	0	0	0	0	0	0	0	0	1	3	4	3	3	3	2	3	3	2	3	1	3	4	3	3	2	2	2	3	3	3	4
28043	女	0	0	0	0	0	0	0	0	0	0	0	0	0	0	1	1	1	1	0	1	0	0	0	0	0	1	2	2	3	2	1	2	1	3	2	3	1	1	1	1	1	2	1	2	1	1	1	3
28467	女	0	0	0	0	0	0	0	0	0	0	0	0	0	0	1	0	1	0	0	1	0	0	0	0	0	0	2	1	1	1	1	1	2	1	1	1	1	1	1	1	2	1	1	2	3	1	1	2
24410	女	0	0	0	0	0	0	0	0	0	0	1	0	0	0	0	0	1	1	0	0	0	0	1	1	0	1	2	1	2	1	3	1	1	3	3	1	1	1	1	1	2	2	2	1	1	1	1	1
28783	女	0	0	0	0	0	0	0	0	0	0	0	0	0	0	1	0	0	1	0	0	0	0	0	0	0	1	1	1	2	2	1	1	1	1	2	1	1	1	1	1	1	1	1	1	1	1	1	1
27927	女	0	0	0	0	1	0	0	0	0	0	0	0	0	0	0	1	0	1	1	1	1	0	0	0	1	0	2	2	2	2	1	1	1	1	1	1	1	2	1	2	2	2	2	2	2	1	1	1
18657	女	1	0	0	0	0	0	0	0	0	0	0	0	0	0	1	1	1	1	1	1	0	1	1	1	1	1	2	2	2	2	1	2	2	2	2	2	1	1	1	2	2	2	1	2	3	3	2	2
28284	女	0	0	0	0	0	0	0	0	0	0	0	0	0	0	1	0	0	0	0	0	0	0	0	0	0	0	2	2	2	2	2	1	1	1	2	1	1	2	3	2	3	2	2	2	2	1	1	2
4158	女	1	0	1	0	1	0	0	0	0	0	0	0	0	0	1	1	1	1	1	0	1	0	1	1	1	1	2	2	2	2	2	2	2	2	2	2	1	1	2	1	1	3	2	2	1	1	1	2
28782	女	0	0	0	0	0	0	0	0	0	0	0	0	0	0	0	0	0	1	0	0	1	0	0	0	0	0	3	2	4	3	3	1	1	4	3	2	1	1	1	2	2	2	3	3	3	1	1	3
28549	男	0	0	0	0	0	0	0	0	0	0	0	0	0	0	1	1	1	0	1	1	1	0	1	1	0	1	2	2	2	2	2	1	2	3	2	3	1	2	2	3	3	2	3	3	3	3	2	3
28164	男	0	0	0	0	0	0	0	1	0	0	0	0	0	0	1	1	1	1	1	0	1	1	1	0	0	0	3	4	3	2	2	2	3	3	3	2	1	3	1	2	2	1	4	2	2	2	2	2
28247	男	0	0	0	0	0	0	0	0	0	0	0	1	0	0	1	0	1	0	0	0	0	0	1	0	0	0	2	4	4	3	2	2	4	4	4	3	1	1	1	4	4	3	3	2	4	4	2	4
28750	男	0	0	0	0	0	0	0	0	0	0	0	0	0	0	0	0	0	0	0	0	0	0	0	0	0	0	1	2	1	1	1	2	2	2	1	1	1	1	2	2	1	1	1	1	1	1	1	2
28450	男	0	1	0	0	0	0	0	0	0	0	0	0	0	0	1	1	0	0	1	0	0	0	0	0	0	1	3	2	1	1	2	2	1	3	2	1	1	3	3	2	2	2	4	1	2	1	1	2
28288	男	1	0	0	0	0	0	0	0	0	0	0	0	0	0	1	0	0	0	1	0	0	0	0	0	0	0	2	2	2	2	2	2	2	2	2	2	3	2	2	3	3	3	2	2	2	2	3	3
28304	男	0	0	0	0	0	0	0	0	0	0	0	0	0	0	1	1	1	1	0	0	0	1	0	0	1	1	3	4	3	2	1	1	3	4	4	1	1	1	1	1	1	1	1	3	1	1	1	4
24716	女	0	0	0	0	0	0	0	0	0	0	0	0	0	0	1	1	1	0	1	1	1	0	1	1	1	0	2	2	2	2	1	2	1	2	2	1	1	1	1	1	3	1	2	1	1	1	1	1
23458	女	1	0	0	0	0	0	0	0	0	0	0	0	0	0	1	0	1	1	1	1	1	0	1	1	1	1	3	3	3	3	3	2	2	3	2	2	2	2	2	2	3	2	2	1	1	1	1	1
25692	女	1	0	0	0	0	0	0	0	0	0	0	0	0	0	1	1	1	1	0	0	0	0	1	0	1	1	2	2	2	2	1	1	1	1	2	1	1	1	1	1	1	1	1	1	1	1	1	1
27809	女	0	0	0	0	0	0	0	0	0	0	0	0	0	0	0	1	1	1	0	1	0	0	1	0	0	0	2	2	2	1	2	2	1	2	3	1	1	1	4	2	3	3	1	2	2	2	1	2
28441	女	0	1	0	0	0	0	0	0	0	0	0	0	0	0	1	1	1	1	0	1	1	0	1	0	1	1	2	1	1	2	1	2	1	1	1	1	1	1	1	1	2	1	1	1	1	1	1	1
25852	女	1	0	0	0	0	0	0	0	0	0	0	0	0	0	1	1	1	1	1	1	1	0	1	0	1	0	2	2	4	2	3	3	1	1	3	2	1	1	1	1	1	2	3	1	2	1	1	2
27968	女	0	0	0	0	0	0	0	0	0	0	0	0	0	0	1	0	0	1	0	0	1	0	0	0	1	0	2	2	2	2	2	1	1	1	2	1	1	1	1	2	3	1	1	2	2	2	2	2
28793	女	0	0	0	0	0	0	0	0	0	0	0	0	0	0	1	0	1	0	0	0	1	1	1	1	0	0	2	1	1	2	1	1	1	1	2	1	1	1	1	2	2	2	2	1	1	1	1	1
16445	女	0	0	0	0	0	0	0	0	0	0	0	0	0	0	1	0	1	0	1	0	0	0	0	0	1	0	2	2	2	2	2	4	1	1	3	1	1	1	1	1	2	2	2	1	1	1	1	2
28072	女	1	0	0	0	1	0	0	0	0	0	0	0	0	0	0	0	0	0	0	0	0	0	0	0	0	0	1	1	2	1	1	1	1	1	1	1	1	1	1	2	1	2	2	1	1	1	1	1
28026	女	0	0	0	0	0	0	0	0	0	0	0	0	0	0	1	0	1	1	0	0	0	0	1	0	0	0	2	2	2	2	1	1	2	2	2	2	1	1	1	2	2	1	1	2	2	2	2	2
24732	女	0	0	0	0	0	0	0	0	0	0	0	0	0	0	1	0	0	0	0	0	0	0	1	0	0	0	2	1	2	2	1	2	1	1	1	1	1	1	3	2	2	1	1	1	1	1	1	2
23845	女	1	1	1	0	0	0	0	0	0	0	0	0	0	0	0	0	0	0	0	0	0	0	0	0	0	0	1	1	2	1	1	1	1	1	1	1	1	1	1	1	1	1	1	2	2	1	2	1
23435	女	0	0	0	0	0	0	0	0	0	0	0	0	0	0	1	0	0	0	0	0	0	0	1	0	0	0	2	2	2	2	1	1	1	2	2	2	2	2	4	2	2	1	1	1	1	1	1	2
26851	女	0	0	0	0	1	0	0	0	0	0	0	0	0	0	1	1	0	0	1	1	1	0	1	1	1	0	2	1	3	2	1	1	1	1	1	1	1	1	1	1	1	3	1	2	4	2	3	4
18424	女	0	0	0	0	0	0	0	0	0	0	0	0	0	0	1	0	1	1	0	0	0	0	1	0	1	0	1	1	1	1	1	1	1	1	1	1	1	1	1	1	1	1	1	1	1	1	1	2
24267	女	1	0	0	0	0	0	0	0	0	0	0	0	0	0	0	0	0	0	0	0	0	0	1	0	0	0	2	2	2	2	2	1	1	2	2	1	2	2	4	2	2	2	2	2	2	2	1	2
23498	女	1	0	0	0	0	0	0	0	0	0	1	0	0	1	1	1	1	1	1	0	1	1	1	1	1	0	2	1	1	2	2	1	3	1	1	1	1	1	1	2	1	1	1	1	1	1	1	1
28514	女	0	0	0	0	0	0	0	0	0	0	0	0	0	0	1	1	0	1	0	0	1	0	1	0	0	0	2	1	2	2	1	1	2	1	1	1	1	1	1	1	1	2	1	1	1	1	1	1
28209	女	0	0	0	0	0	0	0	0	0	0	0	0	0	0	1	1	0	0	1	0	1	0	0	1	1	1	2	2	2	2	1	1	1	1	2	1	1	1	2	1	2	2	2	1	1	1	1	2
28339	女	1	0	0	0	0	0	0	0	0	0	0	0	0	0	0	0	0	0	0	0	0	0	1	1	0	0	2	1	1	1	1	1	1	1	1	1	1	1	1	1	1	1	1	1	1	1	1	1
28567	女	1	0	0	0	0	0	0	0	0	0	0	0	0	0	1	0	0	0	0	1	0	0	1	0	0	0	1	1	1	1	1	1	1	1	1	1	1	1	1	1	1	1	1	1	1	1	1	1
27354	女	0	0	0	0	0	0	0	0	0	0	0	0	0	0	0	0	0	1	0	1	0	0	1	1	0	0	1	2	1	2	2	1	1	1	1	1	1	1	2	2	2	2	2	2	2	1	1	1
25550	女	0	0	0	0	1	0	0	0	0	0	0	0	0	0	1	1	1	1	1	0	0	0	1	1	1	1	2	2	2	1	2	2	1	1	2	1	1	1	1	1	2	2	2	2	3	2	3	3
23551	女	0	0	0	0	0	0	0	0	0	0	0	0	0	0	1	0	1	1	1	0	0	0	1	0	0	0	3	3	3	3	2	1	1	2	3	1	1	1	1	1	4	1	3	1	3	1	1	4
23124	女	0	0	0	0	1	0	0	0	0	0	0	0	0	0	1	0	0	0	0	0	0	0	0	0	0	0	2	2	2	1	1	1	1	1	2	1	1	1	1	1	2	3	3	1	1	1	1	2
25027	女	1	0	0	0	0	0	0	0	0	0	0	0	0	0	1	0	0	1	0	0	0	0	1	1	0	0	2	1	2	2	2	1	1	1	2	1	1	1	1	1	1	1	1	1	1	1	1	1
25050	女	1	0	0	0	0	0	0	0	0	0	0	0	0	0	1	0	1	1	0	0	0	1	1	0	0	0	2	3	2	2	2	1	3	3	3	1	1	1	1	2	2	1	2	2	2	2	2	2
25136	女	0	0	0	0	0	0	0	0	0	0	0	0	0	0	1	1	1	1	0	0	1	0	0	0	0	0	2	1	3	1	1	1	1	2	1	1	1	1	2	2	2	1	1	1	3	1	1	2
24423	男	1	1	1	0	0	0	0	0	0	0	0	0	0	0	0	0	1	0	1	0	0	0	1	0	0	0	1	2	2	2	2	2	2	2	2	2	1	3	4	3	3	2	2	1	1	1	1	1
28531	男	0	1	0	1	0	1	0	0	0	0	0	0	0	0	0	0	0	1	0	0	0	0	1	0	1	0	2	1	2	1	1	1	1	3	2	2	2	2	1	1	1	1	3	1	1	3	1	2
28145	男	0	0	0	0	1	0	0	0	0	0	0	1	0	0	1	0	0	1	1	0	0	1	0	0	0	0	2	2	2	2	3	2	3	2	3	2	1	2	2	1	2	2	2	1	1	1	2	2
24427	男	1	0	0	0	0	0	0	0	0	0	0	0	0	0	0	0	0	0	0	0	0	0	1	0	0	0	1	1	2	1	1	1	2	1	2	1	1	1	1	1	1	1	1	1	1	1	1	2
28156	男	0	0	0	0	0	0	0	0	0	0	0	0	0	0	1	0	0	0	0	0	0	0	1	0	0	0	1	1	2	1	2	1	1	1	2	1	1	2	1	1	3	2	1	1	2	2	2	3
23391	男	0	0	0	0	0	0	0	0	0	0	0	0	0	0	1	0	0	1	1	0	0	0	0	0	0	0	2	1	2	2	2	1	1	1	1	1	1	1	1	1	3	1	1	1	1	1	1	1
28237	男	1	0	0	0	0	0	0	0	0	0	0	0	0	0	1	1	0	1	0	0	1	0	0	0	0	0	2	2	2	1	1	1	2	1	2	1	1	3	4	3	2	1	1	2	3	1	2	2
23123	男	1	0	0	0	0	0	0	0	0	0	0	0	0	0	0	0	0	1	0	0	1	1	0	0	0	0	2	3	4	1	1	1	2	2	3	1	1	1	1	1	2	2	1	3	1	1	1	2
27959	男	0	0	0	0	0	0	0	0	0	0	0	0	0	0	1	0	0	0	0	1	1	0	1	0	0	0	2	3	2	2	1	2	1	1	2	1	1	3	4	2	2	2	2	2	2	2	2	3
25168	男	1	0	0	0	0	0	0	0	0	1	0	0	0	0	1	0	0	0	0	0	0	0	0	0	0	0	1	1	1	1	2	1	3	1	1	1	1	1	2	1	1	2	1	1	1	2	1	1
24255	男	0	0	0	0	1	0	0	0	1	1	0	0	0	0	0	0	0	0	0	0	0	0	0	0	0	0	2	2	2	2	3	1	1	1	3	1	1	1	1	1	2	3	1	2	2	2	1	4
23510	男	1	0	0	0	0	0	0	0	0	0	0	0	0	0	1	1	0	0	0	0	0	0	0	0	0	0	2	2	2	2	2	2	2	2	2	2	2	2	2	2	2	2	2	2	2	2	2	2
28775	女	0	0	0	0	0	0	0	0	0	0	0	0	0	0	0	0	0	0	0	0	0	0	1	0	0	0	3	2	2	2	4	2	1	1	2	1	1	1	1	2	2	1	1	2	2	2	1	2
28190	女	0	0	0	0	0	0	0	0	0	0	0	0	0	0	0	0	0	0	0	1	0	0	1	0	1	0	3	4	3	5	1	1	1	1	2	1	1	3	4	1	2	1	1	1	2	1	1	2
27640	女	0	0	0	0	0	0	0	0	0	0	0	0	0	0	0	0	0	1	0	1	0	0	1	1	1	1	2	1	2	2	2	1	1	1	2	1	1	1	1	1	2	2	3	2	3	1	1	2
28167	女	1	0	0	0	0	0	0	0	0	0	0	0	0	1	1	1	0	1	1	0	1	0	0	0	0	0	2	2	3	2	1	2	2	1	2	2	3	3	4	3	2	3	3	3	3	3	3	4
25871	男	1	0	0	0	0	0	0	0	0	0	0	0	0	0	0	0	0	1	0	0	0	0	0	0	0	0	1	1	1	1	1	1	1	1	1	1	1	3	1	1	1	1	1	1	1	1	1	1
27636	女	0	0	0	0	0	0	0	0	0	0	0	0	0	0	0	0	0	0	0	0	0	0	1	0	0	0	2	1	3	2	1	1	1	1	2	2	1	1	1	2	2	1	1	1	3	1	1	2
27634	女	0	0	0	0	0	0	0	0	0	0	0	0	0	0	0	0	0	0	0	0	0	0	0	0	0	0	2	2	2	2	2	2	1	2	1	1	1	1	1	2	1	2	1	2	1	1	1	2
27915	女	0	0	0	0	0	0	0	0	0	0	0	0	0	0	1	1	1	1	1	1	1	1	1	1	1	0	2	2	3	2	2	2	1	2	3	1	1	2	2	2	3	2	3	2	1	1	1	2
26126	女	0	0	0	0	0	0	0	0	0	0	0	0	0	0	0	0	0	0	0	0	0	0	0	0	0	0	1	1	2	1	1	1	1	1	1	1	1	1	1	1	1	1	1	1	1	1	1	1
16160	男	0	0	0	0	0	0	0	0	0	0	0	1	0	0	1	0	0	1	0	1	1	1	1	1	1	1	4	4	3	3	2	3	4	2	2	3	2	4	4	2	3	4	4	2	3	3	2	3
23011	女	0	0	0	0	0	0	0	0	0	0	0	0	0	0	0	0	0	0	0	0	0	0	0	0	1	0	2	2	2	2	1	1	1	1	2	1	1	1	2	2	2	1	1	1	2	1	1	2
23809	女	1	0	0	0	0	0	0	0	0	0	0	0	0	0	1	1	0	1	1	0	1	0	1	1	1	1	1	2	2	2	2	1	1	3	3	3	3	3	3	2	2	1	1	2	3	3	2	3
28329	男	1	1	1	0	1	0	1	0	0	0	0	0	0	0	0	0	0	1	1	1	1	0	1	0	1	0	1	1	1	1	1	1	1	1	1	1	1	1	5	1	2	3	1	1	1	1	1	2
16071	男	0	0	0	0	1	0	0	0	0	0	0	0	0	0	1	1	1	1	1	1	1	1	1	1	1	1	2	2	3	3	3	3	2	2	3	3	2	4	5	2	2	3	4	2	2	2	2	3
23951	女	0	0	0	0	1	0	0	0	0	0	0	0	0	0	1	1	0	1	0	1	1	1	1	1	1	0	1	2	2	2	1	1	1	1	1	1	1	1	1	1	3	2	1	2	1	1	1	1
27490	男	1	0	0	0	0	0	0	0	0	0	0	0	0	0	0	0	0	0	0	0	0	0	0	0	0	0	3	3	3	3	3	3	3	3	3	3	3	3	3	3	3	3	3	3	3	3	3	3
25664	男	0	0	0	0	1	0	0	0	0	0	0	0	0	0	1	1	1	1	1	0	1	0	1	0	1	0	3	1	5	1	3	1	3	1	1	1	1	5	4	3	3	4	4	3	3	2	2	4
23015	女	1	0	0	0	0	0	0	0	0	0	0	0	0	0	0	0	1	1	0	0	0	0	1	0	1	0	2	2	2	2	2	2	2	2	2	2	2	2	2	2	2	2	2	3	2	4	3	2
27992	男	0	0	1	0	1	0	0	0	0	0	0	0	0	0	1	1	0	1	0	0	0	0	1	0	0	0	2	2	2	2	2	2	2	2	2	2	2	3	4	2	2	3	3	2	2	2	2	2
25880	女	0	0	0	0	0	0	0	0	0	0	0	0	0	0	0	0	0	0	0	0	0	0	0	0	0	0	2	1	2	2	2	2	2	2	2	2	1	1	2	1	2	1	2	1	1	1	1	1
28333	男	1	0	0	0	0	0	0	0	0	0	0	0	0	0	1	0	0	0	0	0	0	0	1	0	0	0	2	2	2	3	1	1	3	1	2	2	1	1	1	3	2	1	1	1	1	1	1	1
24057	男	1	0	0	0	0	0	0	0	0	0	0	0	0	0	1	0	0	1	0	0	0	0	0	0	1	0	2	2	2	2	1	2	1	1	2	1	2	3	4	3	2	1	2	1	3	2	2	3
24033	女	0	1	1	0	0	0	0	0	0	0	0	0	0	0	1	0	0	0	0	0	0	0	0	0	0	0	1	1	1	1	1	1	1	1	1	1	1	1	1	1	1	1	1	1	1	1	1	1
24333	男	0	0	0	0	0	0	0	0	0	0	0	0	0	0	1	0	0	0	0	0	0	0	1	0	0	0	2	2	2	2	3	2	1	2	2	2	1	1	1	2	2	1	1	1	1	2	2	2
23558	女	1	0	0	0	0	0	0	0	0	0	0	0	0	0	1	1	1	1	1	0	0	0	0	0	1	0	2	3	3	3	2	1	2	2	3	2	1	1	4	1	2	1	3	1	2	4	1	2
23556	男	1	0	0	0	0	0	0	0	0	0	0	0	0	0	1	0	0	0	0	0	1	0	0	0	0	0	2	1	2	2	1	1	2	1	1	1	1	1	1	1	1	1	1	1	1	1	1	1
23554	女	1	0	0	0	0	0	0	0	0	0	0	0	0	0	1	0	1	1	0	1	0	0	1	0	0	0	2	1	2	2	1	1	1	1	1	1	1	1	1	1	2	1	2	1	1	1	1	1
24345	女	0	0	0	0	0	0	0	0	0	0	0	0	0	0	0	0	0	0	0	0	0	0	0	0	0	0	1	1	1	1	1	1	1	1	1	1	1	1	2	2	1	1	1	1	1	2	1	1
23545	男	1	0	0	0	0	0	0	0	0	0	0	0	0	0	0	0	0	0	0	0	0	0	0	0	0	0	3	3	3	3	2	1	1	1	2	2	1	1	1	1	1	2	1	1	1	1	1	2
23920	男	0	0	0	0	0	0	0	0	0	0	0	0	0	0	1	0	0	1	1	0	0	0	0	0	0	0	1	1	1	1	3	1	1	1	1	1	1	1	1	1	1	1	3	1	1	1	1	1
23047	女	1	0	0	0	0	0	0	0	0	0	0	0	0	0	0	0	0	0	0	0	0	0	0	0	0	0	1	1	1	1	1	1	1	1	1	1	1	1	1	1	1	1	1	1	1	1	1	1
24314	女	1	0	0	0	0	0	0	0	0	0	0	0	0	0	0	0	0	1	0	0	0	0	0	0	0	0	2	1	3	2	1	1	2	2	2	1	1	1	1	1	2	1	1	2	2	1	1	1
24081	女	0	0	0	0	0	0	0	0	0	0	0	0	0	0	1	1	0	0	0	0	1	0	1	0	0	0	2	2	2	2	1	1	2	1	1	1	3	2	2	2	2	1	2	2	2	2	2	3
24386	女	1	0	0	0	0	0	0	0	0	0	0	0	0	0	1	1	1	0	0	1	0	1	1	1	1	0	2	2	2	2	2	2	2	1	2	2	1	2	2	2	2	1	1	2	2	1	1	2
23531	男	1	0	0	0	0	0	0	0	0	0	0	0	0	0	1	0	0	0	0	0	0	0	1	0	0	0	2	2	2	2	1	2	2	1	1	1	1	1	1	1	2	1	1	2	2	2	1	2
27666	男	0	0	0	0	1	0	0	0	0	0	0	0	0	0	0	0	0	0	0	0	0	0	0	1	0	0	2	1	2	1	1	1	1	1	1	1	1	1	1	1	1	3	2	2	1	1	1	1
29481	女	0	0	0	0	0	0	0	0	0	0	0	0	0	0	1	0	1	1	0	0	0	0	0	0	0	0	3	1	3	2	1	2	3	1	2	1	1	1	1	2	3	2	1	2	3	1	1	2
28090	女	0	0	0	0	0	0	0	0	0	0	0	0	0	0	0	0	0	1	0	0	1	1	1	0	0	0	2	2	3	2	1	1	2	2	2	1	1	2	4	2	2	1	1	1	2	1	1	1
28161	女	0	0	0	0	0	0	0	0	0	0	0	0	0	0	1	1	0	1	1	0	0	0	1	0	0	0	2	2	2	2	2	2	1	1	3	2	1	1	1	1	2	2	1	3	3	1	1	2
28077	女	1	0	0	0	0	0	0	0	0	0	0	0	0	0	1	0	0	0	0	0	0	0	0	0	0	0	1	2	2	2	2	2	1	1	2	2	1	1	1	1	1	1	1	1	1	1	1	1
28461	女	0	1	1	0	0	0	0	1	0	0	0	0	0	0	1	0	0	1	0	1	1	1	1	1	0	1	2	2	2	2	2	2	1	1	3	2	1	2	2	2	2	2	2	2	1	1	1	2
28569	女	0	0	0	0	0	0	0	0	0	0	0	0	1	0	1	1	0	1	1	1	1	0	1	0	1	0	2	2	2	2	2	3	3	4	4	3	1	1	1	1	3	3	4	3	3	4	3	5
23717	女	0	0	0	0	0	0	0	0	0	0	0	0	0	0	0	0	1	1	0	0	0	0	1	0	1	0	2	2	1	2	1	1	2	1	1	1	2	4	4	2	1	2	2	2	2	1	1	1
28452	女	0	0	0	0	1	0	0	0	0	0	0	0	0	0	1	1	0	1	1	1	1	1	0	1	0	1	2	1	3	3	1	1	4	1	2	1	1	1	1	2	3	2	3	2	1	1	1	2
25588	女	0	0	0	0	1	0	0	0	0	0	1	0	0	0	1	1	0	0	0	0	1	0	1	0	1	1	2	1	1	1	1	1	1	2	1	1	1	1	1	1	1	2	1	1	1	1	1	1
4302	女	0	0	0	0	0	0	0	0	0	0	0	0	0	0	1	1	1	1	1	1	1	1	1	1	1	1	3	4	4	3	3	2	3	4	4	3	3	3	5	3	3	4	2	1	3	1	1	3
25595	男	0	0	0	0	1	0	0	0	0	0	0	0	0	0	1	0	1	0	0	0	0	0	1	1	1	0	2	3	4	3	2	2	2	3	3	3	4	3	3	4	4	2	3	2	3	3	3	4
23614	女	0	1	1	0	0	0	0	0	0	0	0	0	0	0	1	0	0	1	1	0	0	0	1	0	0	0	2	3	2	2	3	2	3	4	3	2	1	3	4	2	2	3	4	2	3	3	1	3
23440	女	0	0	0	0	0	0	0	0	0	0	0	0	0	0	0	1	0	1	0	1	1	0	1	0	0	0	1	1	2	1	1	1	1	1	2	1	1	1	3	1	2	1	1	1	1	1	1	2
28208	女	0	0	0	0	1	0	0	0	0	0	1	1	0	0	0	0	0	0	0	0	0	0	0	0	0	0	2	1	2	2	2	2	1	3	2	3	2	3	3	2	2	1	2	1	2	1	1	2
28440	男	0	0	0	0	0	0	0	0	0	1	0	0	0	0	1	0	1	0	0	1	1	1	1	0	0	1	2	3	3	2	1	2	2	2	2	3	1	1	1	1	2	2	1	1	1	1	1	2
[truncated: 2,569 more rows]
[truncated: 44 more columns]

## Sheet: External Validation Cohort
GE12	GE14	EPQN2	ASLEC6	SSRS8	BDI2	BDI7	BDI9	age_years	gender_std	BMI	SLT	SYT	SRT	Treatment3	source
2	2	2	4	3	1	2	2	15.4387	1	15.4959	21	21	20	1	Dataset2
1	1	2	4	3	2	2	2	15.7262	1	17.1124	24	19	20	1	Dataset2
2	2	2	4	4	2	2	2	15.2361	0	23.4962	17	13	6	1	Dataset2
2	2	1	6	2	3	2	2	15.7618	1	16.6168	33	21	21	1	Dataset2
2	2	1	5	2	3	3	3	16.23	0	16.2401	25	14	19	1	Dataset2
2	2	2	2	3	1	1	1	15.499	0	21.7135	0	0	0	0	Dataset2
1	2	1	5	2	1	2	4	16.1752	0	20.4144	25	19	16	1	Dataset2
2	2	1	3	2	2	3	2	15.6085	0	30.1162	43	32	30	1	Dataset2
2	1	2	3	2	3	3	3	15.332	0	16.2278	50	10	10	1	Dataset2
2	1	1	6	2	4	3	2	15.1896	0	19.9219	18	11	16	1	Dataset2
2	2	1	4	2	3	4	2	15.8877	0	23.2458	32	0	0	0	Dataset2
2	2	2	2	3	1	1	1	15.2909	0	19.7896	0	0	0	0	Dataset2
1	1	1	4	2	4	4	2	15.5702	0	17.3604	30	20	15	1	Dataset2
2	2	1	4	3	3	3	2	15.6359	0	30.4878	23	15	17	1	Dataset2
1	1	1	3	2	4	2	2	15.7399	0	21.8105	42	23	21	1	Dataset2
2	2	2	5	2	2	2	2	15.77	1	19.6592	17	18	18	1	Dataset2
2	2	2	4	2	1	1	1	16.1095	0	28.0404	0	0	0	0	Dataset2
2	2	2	3	2	1	1	2	15.8823	0	19.0419	23	16	21	1	Dataset2
2	1	1	5	1	2	4	3	15.9754	0	15.3894	47	40	42	1	Dataset2
1	1	1	6	2	3	3	2	15.8248	0	23.8173	19	14	9	1	Dataset2
2	2	1	4	3	2	1	2	15.6742	0	16.011	0	0	0	0	Dataset2
2	2	1	3	3	1	4	3	15.9097	0	18.6901	18	15	19	1	Dataset2
2	2	1	5	3	3	2	2	18.2505	0	18.5178	19	16	16	1	Dataset2
1	1	2	3	2	1	2	2	18.6612	0	21.6713	14	13	17	1	Dataset2
1	2	1	5	2	1	1	1	19.2252	1	16.8627	11	4	10	1	Dataset2
2	1	1	4	2	3	3	2	19.0609	0	19.9101	34	12	13	1	Dataset2
2	2	2	4	4	1	2	1	18.6448	0	25.6679	0	0	0	0	Dataset2
1	2	1	5	3	3	3	2	18.4038	0	22.0317	21	15	6	1	Dataset2
2	2	2	4	3	3	2	2	19.9452	0	22.2317	26	19	21	1	Dataset2
2	2	2	4	4	3	1	1	18.5654	0	22.4813	29	0	0	0	Dataset2
2	2	2	3	3	3	2	2	18.6064	0	35.9556	22	13	13	1	Dataset2
1	1	1	6	1	4	4	3	19.3347	0	22.3874	44	15	26	1	Dataset2
1	2	1	3	2	2	3	2	18.8884	1	32.0374	19	20	21	1	Dataset2
2	1	2	1	1	4	3	2	18.6667	0	20	56	39	12	1	Dataset2
2	2	1	4	2	2	2	1	19.9452	0	18.4808	24	19	19	1	Dataset2
2	2	2	4	2	4	2	2	18.6146	1	25.7117	20	14	15	1	Dataset2
1	2	2	5	1	2	2	2	20.3943	1	21.6716	22	17	15	1	Dataset2
1	1	2	3	4	3	2	2	20.8624	1	27.0842	56	19	18	1	Dataset2
2	1	1	4	2	3	3	2	19.2663	1	22.3183	70	15	15	1	Dataset2
1	1	1	6	2	4	4	3	20.4271	1	21.4697	36	23	9	1	Dataset2
2	2	2	3	4	1	1	2	19.3593	0	21.875	17	16	17	1	Dataset2
1	1	2	4	3	3	2	2	19.6578	0	24.4898	46	14	13	1	Dataset2
2	2	1	5	2	3	3	2	20.3012	1	19.1512	18	21	21	1	Dataset2
2	2	1	6	4	2	2	2	18.7899	0	30.1757	15	12	17	1	Dataset2
2	2	1	3	3	3	2	2	19.4798	0	17.6681	18	12	13	1	Dataset2
2	2	1	3	2	3	2	2	21.6016	0	16.5289	25	17	19	1	Dataset2
2	2	2	3	1	3	2	2	20.0958	1	24.2215	21	14	14	1	Dataset2
2	2	2	2	2	1	1	2	20.7201	1	20.5151	53	18	18	1	Dataset2
2	2	1	5	3	2	2	2	20.4244	0	22.1104	19	15	15	1	Dataset2
2	2	1	5	2	2	2	2	20.3532	0	18.902	22	16	20	1	Dataset2
1	2	1	2	4	1	1	1	20.063	0	24.7426	15	18	10	1	Dataset2
2	2	1	4	3	3	3	2	21.7385	0	31.6032	20	16	16	1	Dataset2
1	2	2	3	2	1	1	2	20.679	0	20.8325	18	19	19	1	Dataset2
2	1	2	2	2	3	2	2	19.4442	1	20.2577	41	17	21	1	Dataset2
2	2	2	3	2	1	1	2	20.898	1	21.2585	28	16	16	1	Dataset2
2	2	2	4	2	2	2	2	19.6605	1	27.0092	28	16	19	1	Dataset2
2	2	2	4	3	1	1	1	19.9671	1	28.1197	31	20	20	1	Dataset2
2	2	1	4	3	4	2	2	20.3806	0	30.1103	15	15	15	1	Dataset2
2	2	2	3	3	3	1	1	20.3751	0	22.1828	0	0	0	0	Dataset2
2	2	1	4	2	3	2	2	20.6023	0	22.0581	23	17	17	1	Dataset2
1	2	2	4	2	3	4	2	19.8029	0	16.0231	23	17	15	1	Dataset2
2	2	1	2	2	3	1	2	20.0219	1	21.2585	28	15	16	1	Dataset2
1	2	1	3	2	3	3	2	20.5284	0	20.109	17	6	9	1	Dataset2
2	2	2	4	2	1	2	2	19.666	1	27.6602	37	0	0	0	Dataset2
2	2	2	3	3	1	1	1	19.2553	0	23.7253	0	0	0	0	Dataset2
2	2	1	4	2	3	3	2	19.1841	0	17.1791	13	14	15	1	Dataset2
2	2	2	4	3	1	1	1	20.909	1	29.4118	0	0	0	0	Dataset2
2	2	1	6	2	3	3	2	19.8576	1	22.5451	27	19	19	1	Dataset2
1	2	2	3	2	1	1	1	21.9849	0	25.3589	0	0	0	0	Dataset2
2	2	2	3	3	1	1	2	20.8898	0	17.9463	18	12	12	1	Dataset2
2	2	1	4	3	3	2	1	20.7337	0	19.4034	26	18	19	1	Dataset2
2	2	2	3	2	1	1	1	20.2327	1	35.1415	0	0	0	0	Dataset2
1	1	2	4	3	1	1	1	21.9302	0	23.9984	39	0	0	0	Dataset2
2	2	2	4	4	1	1	1	20.6324	1	23.4568	0	0	0	0	Dataset2
2	2	2	3	3	2	2	1	21.4976	0	17.0392	27	0	0	0	Dataset2
2	2	2	1	3	1	1	1	21.6181	0	17.9413	0	0	0	0	Dataset2
2	2	2	2	4	1	1	1	21.3908	0	19.6052	0	0	0	0	Dataset2
2	2	2	3	3	1	1	1	19.9069	1	19.9496	0	0	0	0	Dataset2
2	2	2	4	3	1	1	1	20.7502	0	24.1217	33	0	0	0	Dataset2
2	2	2	4	3	1	1	1	20.5394	0	16.5912	0	0	0	0	Dataset2
2	2	2	4	3	1	1	1	20.5941	0	22.6777	0	0	0	0	Dataset2
2	2	2	2	2	1	1	1	20.0055	1	24.4193	0	0	0	0	Dataset2
2	2	1	4	2	1	3	2	19.5975	0	29.0318	30	33	34	1	Dataset2
2	2	1	4	4	1	1	1	19.5619	0	17.3611	0	0	0	0	Dataset2
1	2	1	4	2	3	3	2	19.0883	1	19.79	38	12	12	1	Dataset2
2	2	2	5	3	1	2	1	20.2902	0	32.1893	28	0	0	0	Dataset2
2	2	2	1	3	1	1	1	21.1581	1	21.6716	0	0	0	0	Dataset2
2	2	2	4	1	3	2	2	20.3614	1	27.4717	19	0	0	0	Dataset2
2	2	2	4	1	3	1	1	18.7543	1	19.7133	0	0	0	0	Dataset2
2	2	2	2	3	1	1	1	20.8706	0	22.8624	0	0	0	0	Dataset2
2	2	2	3	1	1	1	1	20.6023	1	23.0954	0	0	0	0	Dataset2
2	2	2	3	2	4	4	2	19.2827	1	21.6413	0	0	0	0	Dataset2
2	2	2	2	2	1	1	1	21.0979	1	31.0204	0	0	0	0	Dataset2
2	2	2	5	4	1	1	1	19.8467	0	22.0522	22	0	0	0	Dataset2
2	2	2	2	3	1	1	1	18.9925	1	23.8884	0	0	0	0	Dataset2
2	2	1	3	3	1	1	1	16.2683	0	24.0454	0	0	0	0	Dataset2
1	1	1	6	1	3	4	3	16.345	0	27.5427	37	16	16	1	Dataset2
1	1	1	5	2	1	2	2	15.8467	0	17.5781	89	27	29	1	Dataset2
1	2	2	4	1	3	4	2	15.1896	0	20.202	55	46	36	1	Dataset2
2	2	1	3	2	1	2	2	16.512	0	19.3642	76	44	12	1	Dataset2
2	2	1	4	3	2	2	2	16.7201	1	17.7409	29	0	0	0	Dataset2
1	1	1	2	1	4	4	3	15.3511	0	17.6254	19	8	8	1	Dataset2
2	1	2	4	3	3	3	2	16.3614	0	17.3282	36	2	12	1	Dataset2
2	1	2	4	3	3	3	2	16.3614	0	17.3282	36	2	12	1	Dataset2
1	1	1	4	2	1	2	2	16.3477	0	35.2344	64	49	0	0	Dataset2
2	2	1	4	2	4	3	3	16.0821	0	22.8332	67	28	28	1	Dataset2
2	2	1	4	2	4	3	3	16.0821	0	22.8332	67	28	28	1	Dataset2
1	2	1	4	2	1	3	2	16.1068	1	25.7991	37	21	23	1	Dataset2
2	2	2	2	2	1	1	1	16.4244	2	22.2222	0	0	0	0	Dataset2
2	1	2	6	2	3	3	2	15.154	0	22.0684	20	15	15	1	Dataset2
1	2	1	6	4	1	2	2	17.7878	1	19.1309	0	0	0	0	Dataset2
2	2	2	3	3	1	1	2	15.6194	0	20.2377	0	0	0	0	Dataset2
2	2	1	6	2	2	2	2	16.011	1	17.7086	10	10	0	0	Dataset2
1	1	1	4	2	4	2	2	18.1136	1	31.4564	14	17	0	0	Dataset2
2	1	1	4	3	2	3	2	16.2218	0	20.4956	60	44	43	1	Dataset2
2	2	2	3	1	2	2	1	16.8953	1	17.9592	0	0	0	0	Dataset2
1	1	1	6	1	4	4	3	16.6352	1	16.0912	52	33	7	1	Dataset2
2	2	2	4	3	1	1	1	17.5441	1	27.3813	0	0	0	0	Dataset2
1	1	1	4	1	2	2	2	17.0185	1	23.8623	16	19	14	1	Dataset2
2	2	2	3	1	1	1	1	16.1807	1	28.7037	0	0	0	0	Dataset2
1	2	2	5	3	1	1	1	17.2348	1	18.0209	0	0	0	0	Dataset2
2	2	2	3	3	1	1	1	17.2841	1	19.3336	0	0	0	0	Dataset2
2	2	2	2	1	1	1	1	17.6482	1	19.2759	0	0	0	0	Dataset2
2	2	2	3	2	1	1	1	16.3587	1	17.531	0	0	0	0	Dataset2
1	1	2	4	2	3	1	1	18.2396	1	21.5009	40	0	0	0	Dataset2
1	2	2	6	2	1	1	2	16.4764	1	32.2531	0	0	0	0	Dataset2
2	2	2	3	3	1	1	1	16.8679	1	34.7178	0	0	0	0	Dataset2
2	2	2	2	3	1	1	1	17.0486	1	30.3177	0	0	0	0	Dataset2
2	2	2	1	1	1	1	1	17.0732	1	20.7612	0	0	0	0	Dataset2
2	1	1	6	3	3	3	3	15.2854	0	17.9688	43	30	14	1	Dataset2
2	2	2	1	4	1	1	2	12.794	0	16.8887	20	17	19	1	Dataset2
1	1	1	4	1	3	2	4	14.1547	0	15.5444	59	33	13	1	Dataset2
2	2	1	4	3	1	1	1	12.9254	0	33.7774	0	0	0	0	Dataset2
2	2	1	4	3	4	4	2	13.0951	0	15.8169	27	14	21	1	Dataset2
1	2	1	3	2	3	2	2	14.7707	0	17.1029	21	14	14	1	Dataset2
1	1	1	6	1	3	1	3	12.8241	1	17.313	33	21	21	1	Dataset2
2	2	1	4	2	1	1	1	14.6804	0	15.5817	52	0	0	0	Dataset2
1	1	1	4	2	3	3	3	15.6413	0	15.8079	32	11	11	1	Dataset2
2	2	2	1	4	1	1	1	13.3388	0	22.83	0	0	0	0	Dataset2
2	2	1	4	2	2	2	2	15.6057	1	19.257	45	30	17	1	Dataset2
1	2	1	3	2	3	3	2	15.3429	0	21.4031	20	14	17	1	Dataset2
2	2	2	3	2	3	1	1	14.6968	0	16.7657	0	0	0	0	Dataset2
1	2	1	3	2	3	3	2	15.3429	0	21.4031	20	14	17	1	Dataset2
2	2	2	3	3	3	1	1	13.1225	0	17.4818	0	0	0	0	Dataset2
2	2	1	3	2	3	3	2	15.4935	0	20.9961	12	12	12	1	Dataset2
2	2	2	2	3	1	1	1	12.4709	0	23.4591	0	0	0	0	Dataset2
2	2	1	2	2	4	1	2	11.7645	0	17.5781	36	28	30	1	Dataset2
1	2	1	4	2	3	2	2	15.5975	0	21.0938	25	5	6	1	Dataset2
2	2	2	2	3	1	3	2	15.5948	0	18.2563	33	11	12	1	Dataset2
1	2	1	3	2	3	3	2	15.3429	0	21.4031	20	14	17	1	Dataset2
1	1	1	6	3	3	4	3	15.2991	0	17.9418	36	26	30	1	Dataset2
2	2	2	1	3	1	1	1	13.577	1	18.4202	0	0	0	0	Dataset2
2	2	2	1	3	1	1	1	13.3196	0	17.5781	0	0	0	0	Dataset2
2	2	1	3	3	1	1	2	13.7303	0	23.9152	49	36	34	1	Dataset2
1	1	1	6	2	4	4	3	13.1773	0	18.75	19	13	10	1	Dataset2
2	2	2	4	1	1	1	1	13.1691	0	20.6035	0	0	0	0	Dataset2
2	1	1	3	2	2	4	3	14.2779	0	26.4024	59	12	15	1	Dataset2
2	1	1	3	2	2	4	3	14.2779	0	26.4024	59	12	15	1	Dataset2
2	2	2	1	1	1	1	1	13.473	1	15.5489	0	0	0	0	Dataset2
2	2	1	4	2	2	2	2	12.8569	0	15.0122	13	14	14	1	Dataset2
2	1	1	5	1	1	3	2	13.2786	0	17.5556	33	27	18	1	Dataset2
1	1	1	4	3	3	4	3	15.4798	0	17.2635	56	22	20	1	Dataset2
1	1	1	4	3	3	4	3	15.4798	0	17.2635	56	22	20	1	Dataset2
2	1	2	3	2	1	1	2	13.3552	0	17.0088	0	0	0	0	Dataset2
2	2	2	3	1	1	1	1	13.5031	0	17.2737	0	0	0	0	Dataset2
2	2	2	4	1	1	1	2	13.1253	1	22.8624	26	19	18	1	Dataset2
2	2	2	4	1	1	1	2	13.1253	1	22.8624	26	19	18	1	Dataset2
2	1	1	3	4	2	2	2	13.2895	0	16.6797	34	27	26	1	Dataset2
2	2	1	4	2	3	3	2	14.3107	0	17.7999	14	8	8	1	Dataset2
2	2	2	3	3	2	2	2	13.0075	0	17.7154	24	19	0	0	Dataset2
2	2	1	4	2	3	3	2	16.0246	0	20.83	21	13	13	1	Dataset2
2	1	1	3	4	2	2	2	13.2895	0	16.6797	34	27	26	1	Dataset2
2	1	1	4	3	3	2	2	13.7823	0	19.8347	36	26	31	1	Dataset2
2	2	2	3	2	1	1	1	13.2977	0	16.6468	0	0	0	0	Dataset2
2	2	1	6	2	2	3	4	13.5195	0	16.8242	16	14	18	1	Dataset2
2	2	2	3	3	1	1	1	15.551	0	20.4294	0	0	0	0	Dataset2
2	2	1	5	3	4	4	2	14.5927	0	15.7231	34	32	30	1	Dataset2
2	2	1	4	1	3	3	2	15.3402	0	16.8911	29	15	12	1	Dataset2
1	1	1	4	1	1	4	2	14.9788	0	19.8141	23	9	15	1	Dataset2
1	1	1	4	1	1	4	2	14.9788	0	19.8141	23	9	15	1	Dataset2
1	1	1	6	1	4	4	2	14.6557	0	18.7328	32	13	7	1	Dataset2
2	1	2	3	3	3	3	2	13.358	0	16.4466	21	14	15	1	Dataset2
2	2	2	2	4	1	1	1	14.5106	1	16.6493	0	0	0	0	Dataset2
2	1	2	3	3	3	3	2	13.358	0	16.4466	21	14	15	1	Dataset2
1	1	1	6	1	4	4	3	15.0801	0	22.9481	81	52	13	1	Dataset2
1	2	2	5	1	3	2	2	15.0472	1	16.7657	21	14	16	1	Dataset2
2	2	2	1	4	1	2	1	15.2964	0	18.2222	0	0	0	0	Dataset2
1	2	1	5	1	3	2	2	15.0445	0	29.6875	6	6	6	1	Dataset2
1	2	1	3	2	2	3	2	15.707	0	19.2234	22	15	16	1	Dataset2
1	1	1	6	1	3	4	2	14.2998	1	15.6226	29	18	7	1	Dataset2
1	2	1	2	1	3	2	1	13.4319	0	18.3143	0	0	0	0	Dataset2
1	2	1	3	1	3	1	2	14.8309	0	17.0874	13	14	18	1	Dataset2
2	2	1	3	1	3	2	2	13.3032	0	19.8184	26	17	17	1	Dataset2
2	2	1	5	2	1	1	1	15.6824	0	22.4082	0	0	0	0	Dataset2
2	2	2	1	3	1	1	1	13.1691	0	17.5781	0	0	0	0	Dataset2
1	1	1	5	2	4	4	4	15.4278	0	23.4375	25	10	6	1	Dataset2
2	2	2	1	1	1	1	1	14.5982	0	17.898	0	0	0	0	Dataset2
1	1	1	4	1	3	4	3	14.3107	0	16.2331	29	21	16	1	Dataset2
2	2	2	4	2	3	3	2	13.6263	0	16.937	15	10	0	0	Dataset2
2	2	2	1	4	1	1	1	13.1554	0	19.3337	0	0	0	0	Dataset2
2	1	1	4	1	2	4	2	12.8679	1	22.299	11	7	9	1	Dataset2
2	2	2	3	2	1	4	2	12.2136	0	20.83	0	0	0	0	Dataset2
2	1	2	3	3	3	2	1	14.475	0	20.109	10	0	0	0	Dataset2
2	2	1	4	2	3	4	2	15.1294	0	18.7962	13	12	12	1	Dataset2
2	2	2	1	2	1	1	1	12.7529	1	18.1312	0	0	0	0	Dataset2
2	2	1	3	2	3	3	2	15.7043	0	19.563	0	0	0	0	Dataset2
2	1	1	4	1	4	3	2	15.8549	0	17.0529	41	34	34	1	Dataset2
2	2	2	4	3	2	1	1	13.1608	0	16.8962	0	0	0	0	Dataset2
1	1	1	4	2	4	3	2	15.9233	1	23.8087	44	15	7	1	Dataset2
2	2	1	4	2	2	2	2	14.7762	0	19.6283	55	15	16	1	Dataset2
2	2	1	3	3	1	1	1	15.3484	0	15.1111	23	21	18	1	Dataset2
2	2	1	4	3	1	1	2	12.8925	0	16.1227	23	17	16	1	Dataset2
2	2	2	2	3	1	1	1	15.2936	0	16.937	0	0	0	0	Dataset2
2	2	1	6	2	3	3	2	13.7851	0	16.8847	28	20	0	0	Dataset2
2	1	2	1	3	1	1	1	14.5161	0	19.092	26	0	0	0	Dataset2
2	2	2	1	3	4	1	1	15.9124	1	15.6046	0	0	0	0	Dataset2
2	2	2	2	3	1	1	1	13.0815	0	16.6603	0	0	0	0	Dataset2
1	1	1	5	1	4	4	3	15.8741	0	20.3954	19	4	6	1	Dataset2
2	2	1	4	2	2	2	2	14.1547	0	16.2331	15	12	15	1	Dataset2
2	2	2	2	3	1	1	1	12.6489	1	16.225	0	0	0	0	Dataset2
2	2	2	5	1	3	1	2	14.9925	0	18.7962	20	17	16	1	Dataset2
2	2	1	4	2	1	1	1	15.8412	0	17.7096	0	0	0	0	Dataset2
2	2	1	3	3	3	2	2	15.3292	0	17.2447	23	15	14	1	Dataset2
2	2	2	2	3	1	1	1	15.3566	0	19.361	0	0	0	0	Dataset2
2	2	1	5	3	2	3	3	15.6988	0	18.2663	19	24	20	1	Dataset2
2	2	1	5	3	3	4	2	14.7351	0	21.4844	18	15	13	1	Dataset2
2	2	1	3	3	3	2	2	15.3292	0	17.2447	23	15	14	1	Dataset2
2	2	1	5	3	2	3	3	15.6988	0	18.2663	19	24	20	1	Dataset2
1	1	1	3	4	1	1	1	12.7611	1	16.9823	62	44	62	1	Dataset2
2	2	1	3	3	1	1	1	13.7823	0	16.6493	47	35	37	1	Dataset2
2	2	2	1	4	1	1	1	15.332	0	23.4375	0	0	0	0	Dataset2
2	1	1	4	2	2	2	3	12.3504	0	19.6752	48	33	21	1	Dataset2
2	2	2	4	2	1	1	2	15.3238	0	20.8247	0	0	0	0	Dataset2
2	2	2	3	3	1	1	1	15.7837	1	24.4646	0	0	0	0	Dataset2
2	2	2	3	3	1	1	1	12.8871	0	17.6254	0	0	0	0	Dataset2
2	2	2	1	3	1	1	1	12.8734	1	17.6693	0	0	0	0	Dataset2
2	2	1	3	3	3	2	1	15.5373	0	38.5802	0	0	0	0	Dataset2
1	1	1	6	2	3	2	2	15.0363	0	16.0222	42	31	32	1	Dataset2
2	2	2	3	3	3	4	2	15.5373	0	18.9036	23	17	18	1	Dataset2
2	2	2	3	2	3	2	1	14.5927	0	16.8475	0	0	0	0	Dataset2
2	2	1	3	2	2	2	2	14.3682	0	22.4914	28	21	21	1	Dataset2
1	1	2	4	1	2	2	2	13.1636	0	18.8271	32	25	26	1	Dataset2
1	1	1	6	1	4	2	2	15.0116	0	31.1111	48	29	19	1	Dataset2
2	1	1	2	2	3	2	2	14.7023	0	17.8465	24	17	15	1	Dataset2
2	2	2	3	2	3	3	2	15.6222	0	22.2137	41	26	27	1	Dataset2
1	1	1	5	2	3	2	2	15.269	0	18.7305	9	9	9	1	Dataset2
2	1	1	6	3	3	3	3	15.3018	0	17.9688	43	30	14	1	Dataset2
2	1	1	6	3	3	3	3	15.3018	0	17.9688	43	30	14	1	Dataset2
2	2	1	5	3	4	4	2	13.0459	1	20.8611	17	17	16	1	Dataset2
2	2	2	4	2	3	1	1	14.3107	0	18.3594	0	0	0	0	Dataset2
2	2	2	3	4	1	1	1	15.1622	0	17.2737	0	0	0	0	Dataset2
1	1	1	3	1	1	1	1	15.5209	0	16.8887	0	0	0	0	Dataset2
1	1	1	6	1	3	4	2	13.243	1	15.4321	63	22	26	1	Dataset2
1	2	1	6	2	2	3	3	14.9706	1	23.4375	15	4	4	1	Dataset2
2	2	2	3	1	1	1	1	14.3354	0	18.75	0	0	0	0	Dataset2
2	2	2	3	4	1	1	1	15.5209	0	23.1473	0	0	0	0	Dataset2
2	2	2	1	3	1	1	1	13.755	0	21.0938	0	0	0	0	Dataset2
2	2	2	1	1	1	1	1	15.7481	1	19.052	0	0	0	0	Dataset2
2	2	1	3	3	1	1	2	15.3402	0	18.6268	0	0	0	0	Dataset2
2	2	2	3	4	3	2	2	12.2108	0	18.1955	33	21	13	1	Dataset2
2	2	2	4	2	2	2	2	13.3525	1	24.0346	23	15	15	1	Dataset2
2	1	1	1	1	3	3	2	15.1622	0	19.0443	0	0	0	0	Dataset2
2	2	2	2	3	3	3	2	13.3607	1	18.9555	63	11	12	1	Dataset2
2	2	2	2	2	1	1	1	13.2786	1	23.4375	0	0	0	0	Dataset2
2	2	2	2	4	1	1	1	12.7995	1	16.7969	0	0	0	0	Dataset2
2	2	2	2	3	1	1	1	13.7933	1	27.2509	0	0	0	0	Dataset2
1	2	1	6	3	4	4	4	13.5524	0	24.8358	22	19	18	1	Dataset2
2	2	2	4	2	1	1	1	13.5989	0	15.6013	0	0	0	0	Dataset2
2	2	2	1	3	1	1	1	14.9295	1	15.9439	0	0	0	0	Dataset2
2	2	2	3	3	1	1	1	12.9336	1	29.1363	0	0	0	0	Dataset2
2	2	1	4	2	2	2	1	13.6975	1	16.0231	0	0	0	0	Dataset2
2	2	2	1	4	1	1	1	13.0103	1	15.7439	0	0	0	0	Dataset2
1	1	1	6	1	4	2	2	14.9952	0	31.1111	48	29	19	1	Dataset2
2	2	2	1	4	1	1	1	13.0842	1	23.1473	0	0	0	0	Dataset2
1	1	1	4	2	2	1	1	15.9097	0	17.0562	0	0	0	0	Dataset2
2	1	1	5	2	3	2	2	14.6037	0	37.4656	43	8	13	1	Dataset2
2	1	2	3	2	3	2	2	13.1389	0	20.1733	16	13	16	1	Dataset2
2	1	1	3	2	3	3	2	12.9747	0	16.7311	64	46	44	1	Dataset2
2	2	1	5	2	3	1	2	13.8672	1	21.7738	28	18	0	0	Dataset2
2	2	2	4	2	2	2	2	13.6865	0	18.3655	28	0	0	0	Dataset2
2	2	2	2	2	1	1	1	14.8118	0	16.6493	0	0	0	0	Dataset2
2	2	2	3	3	1	1	1	15.384	0	22.6409	0	0	0	0	Dataset2
2	1	1	4	1	2	4	2	12.8734	1	22.299	11	7	9	1	Dataset2
2	2	2	4	2	1	2	2	13.6427	0	18.4425	21	17	19	1	Dataset2
2	2	2	1	3	1	1	1	13.1472	1	15.2038	0	0	0	0	Dataset2
2	2	1	5	2	3	4	2	14.4887	0	18.369	38	33	20	1	Dataset2
2	2	1	3	2	3	2	1	13.4182	1	16.5889	41	31	29	1	Dataset2
2	2	2	4	2	1	2	2	13.6427	0	18.4425	21	17	19	1	Dataset2
2	2	2	1	4	1	1	1	14.0534	1	16.6493	0	0	0	0	Dataset2
2	2	2	3	3	1	1	1	13.4073	1	18.8189	0	0	0	0	Dataset2
2	1	1	5	2	3	2	2	13.8344	0	17.2066	49	40	11	1	Dataset2
2	2	2	3	3	3	1	1	15.0445	0	19.1075	0	0	0	0	Dataset2
2	2	2	3	3	4	1	1	12.9418	1	19.9315	0	0	0	0	Dataset2
2	1	1	3	2	4	4	2	13.6345	1	31.7418	0	0	0	0	Dataset2
2	2	2	1	1	1	1	1	15.9452	1	19.6052	0	0	0	0	Dataset2
2	2	2	1	2	1	1	1	13.7687	0	18.3655	0	0	0	0	Dataset2
2	2	2	4	4	3	2	3	13.6318	0	19.2578	23	15	19	1	Dataset2
2	1	1	4	2	3	3	3	14.924	0	18.7305	16	10	0	0	Dataset2
2	2	1	4	3	1	1	2	13.9795	0	21.2084	20	14	15	1	Dataset2
2	2	2	3	3	1	1	1	13.9658	0	19.4771	0	0	0	0	Dataset2
2	2	2	3	3	1	1	1	15.1677	0	17.2737	0	0	0	0	Dataset2
2	2	2	2	3	1	1	1	15.6496	0	22.8269	0	0	0	0	Dataset2
2	2	1	4	2	2	2	2	14.0534	0	17.3604	19	12	12	1	Dataset2
2	2	2	4	2	2	3	2	13.1691	1	15.7778	11	8	8	1	Dataset2
2	2	2	5	3	1	1	1	14.3409	0	17.9418	0	0	0	0	Dataset2
2	2	2	1	4	1	1	1	15.8768	0	21.9816	0	0	0	0	Dataset2
2	2	2	2	2	3	2	1	14.2259	0	17.0874	0	0	0	0	Dataset2
1	1	1	6	1	4	4	3	15.0828	0	22.9481	81	52	13	1	Dataset2
2	2	2	5	2	3	2	2	12.4134	0	16.4474	74	46	30	1	Dataset2
1	1	1	6	3	4	4	3	15.8303	1	32.2831	44	13	0	0	Dataset2
2	2	1	3	3	3	2	2	14.5982	0	17.7778	22	15	17	1	Dataset2
2	2	1	4	3	3	2	2	15.1376	0	25.721	0	0	0	0	Dataset2
2	2	2	1	4	1	1	1	12.9117	0	18.342	0	0	0	0	Dataset2
1	2	1	4	1	3	4	2	12.8323	0	21.4903	31	30	31	1	Dataset2
1	2	1	5	2	4	2	2	13.64	0	18.4444	18	15	0	0	Dataset2
2	2	2	1	4	1	1	1	14.1109	1	25.6179	0	0	0	0	Dataset2
2	2	2	2	3	4	3	2	13.0349	1	19.2706	0	0	0	0	Dataset2
2	2	2	3	3	1	1	1	14.6393	0	16.8475	0	0	0	0	Dataset2
2	2	1	4	3	3	3	2	14.5243	0	20.0877	25	16	17	1	Dataset2
2	2	2	1	3	3	1	1	13.2621	1	18.132	0	0	0	0	Dataset2
2	1	2	3	2	2	2	2	14.7707	0	15.625	0	0	0	0	Dataset2
2	2	1	4	1	2	1	2	13.0294	0	20.1951	27	0	0	0	Dataset2
1	2	1	5	3	4	4	2	14.0835	0	20.6279	0	0	0	0	Dataset2
2	1	1	4	2	3	2	2	13.4264	0	17.7458	31	22	23	1	Dataset2
2	2	2	3	3	3	1	1	15.0418	0	19.1075	0	0	0	0	Dataset2
2	2	2	1	4	1	1	1	13.3799	0	17.7541	0	0	0	0	Dataset2
2	2	1	2	2	1	1	1	14.2861	1	17.301	0	0	0	0	Dataset2
2	2	2	3	3	1	1	1	14.1684	0	17.5781	0	0	0	0	Dataset2
2	2	2	2	3	3	1	1	13.8426	0	17.301	0	0	0	0	Dataset2
2	2	2	6	2	1	1	1	15.3402	0	23.1911	0	0	0	0	Dataset2
2	2	1	4	2	1	2	2	14.6092	0	19.9219	0	0	0	0	Dataset2
2	2	2	4	1	4	1	2	13.0294	0	20.1951	26	17	13	1	Dataset2
2	2	2	1	2	1	1	1	13.6838	1	18.6529	0	0	0	0	Dataset2
2	2	1	4	2	3	4	2	15.6057	0	21.6441	35	26	25	1	Dataset2
2	2	2	3	3	1	1	1	13.295	1	22.8928	0	0	0	0	Dataset2
2	1	1	5	3	3	2	2	14.4832	0	20.202	17	12	14	1	Dataset2
2	2	2	2	3	1	1	1	14.4778	0	17.6067	0	0	0	0	Dataset2
2	2	2	1	3	1	1	1	12.627	1	16.2274	0	0	0	0	Dataset2
1	1	1	4	2	4	3	2	13.5661	0	26.7094	46	29	24	1	Dataset2
2	1	1	6	2	4	2	2	13.7331	0	18.6395	35	20	25	1	Dataset2
2	2	1	2	2	2	2	1	14.4613	0	18.4911	0	0	0	0	Dataset2
2	2	1	3	3	1	1	1	14.7461	0	15.2038	0	0	0	0	Dataset2
2	2	1	2	1	1	1	1	15.3648	0	15.6226	19	15	0	0	Dataset2
2	2	2	1	3	1	1	1	13.0212	1	18.4911	0	0	0	0	Dataset2
2	2	1	4	2	2	3	2	13.1335	0	15.4578	23	19	9	1	Dataset2
2	2	2	3	3	1	1	1	14.204	0	22.1893	0	0	0	0	Dataset2
1	1	1	3	3	1	1	1	15.6851	0	20.7031	0	0	0	0	Dataset2
2	2	2	1	3	1	1	1	15.05	1	19.487	0	0	0	0	Dataset2
2	1	1	3	4	1	1	2	14.5024	1	16.7311	20	17	17	1	Dataset2
2	2	1	6	1	4	2	2	14.8665	1	15.2249	11	15	15	1	Dataset2
2	2	2	3	3	1	1	1	14.0096	1	24.5243	0	0	0	0	Dataset2
2	2	2	2	2	1	1	1	15.6085	1	19.005	0	0	0	0	Dataset2
1	1	2	4	1	2	2	2	13.1417	0	20.1951	32	25	26	1	Dataset2
2	2	2	3	3	1	1	1	13.024	1	22.2656	0	0	0	0	Dataset2
2	2	1	4	2	4	3	2	14.5982	0	16.6239	44	32	33	1	Dataset2
2	2	1	4	4	4	2	1	15.5565	0	15.4006	0	0	0	0	Dataset2
2	2	2	3	2	1	1	1	15.707	0	17.7462	0	0	0	0	Dataset2
1	1	1	3	2	3	3	2	15.0281	0	26.3465	71	0	0	0	Dataset2
2	2	2	2	1	1	1	2	12.5722	1	16.6468	0	0	0	0	Dataset2
1	1	1	4	2	4	3	2	13.5661	0	26.7094	46	29	24	1	Dataset2
1	1	1	4	2	4	4	4	15.8522	0	18.1787	11	10	12	1	Dataset2
1	2	2	3	2	3	1	1	13.2786	1	20.6612	0	0	0	0	Dataset2
1	1	1	5	1	4	4	3	13.0075	0	16.3147	23	12	3	1	Dataset2
2	2	2	5	3	2	2	2	13.0404	1	18.7305	11	7	8	1	Dataset2
2	2	1	3	2	2	3	2	14.8474	0	20.7008	0	0	0	0	Dataset2
2	2	2	6	2	1	1	1	13.5359	0	21.4844	0	0	0	0	Dataset2
1	1	1	4	2	4	3	2	13.5661	0	26.7094	46	29	24	1	Dataset2
2	2	2	2	3	1	1	1	15.3539	0	18.902	0	0	0	0	Dataset2
2	2	1	4	2	3	2	1	13.2539	0	17.2879	0	0	0	0	Dataset2
2	1	1	5	1	4	4	4	13.5469	0	27.4077	42	0	0	0	Dataset2
2	2	1	4	3	4	4	3	13.462	0	17.898	31	14	18	1	Dataset2
2	2	2	5	2	2	3	2	14.8419	0	19.2277	21	18	18	1	Dataset2
2	1	1	4	2	1	3	2	15.2717	0	21.3039	19	11	12	1	Dataset2
2	2	2	2	1	1	1	1	13.4976	0	16.4366	0	0	0	0	Dataset2
2	2	1	5	2	3	3	2	15.4114	0	18.0789	0	0	0	0	Dataset2
2	2	2	2	1	1	1	2	13.0869	1	17.0874	33	0	0	0	Dataset2
2	2	2	4	3	1	1	1	12.449	0	17.8506	0	0	0	0	Dataset2
2	2	1	4	2	1	1	1	14.9021	1	20.9572	0	0	0	0	Dataset2
2	2	2	3	4	1	1	1	12.8214	0	18.8271	0	0	0	0	Dataset2
2	2	1	4	3	4	2	2	12.9884	0	19.0677	0	0	0	0	Dataset2
2	2	2	1	3	1	1	1	13.4292	1	16.7969	0	0	0	0	Dataset2
2	2	2	3	3	1	1	1	14.2012	0	16.8475	0	0	0	0	Dataset2
2	2	2	2	2	1	1	1	13.4565	0	16.9747	0	0	0	0	Dataset2
2	2	2	5	2	4	4	1	15.4552	0	15.7943	24	0	0	0	Dataset2
2	2	2	4	4	2	2	1	15.1431	0	20.3954	25	0	0	0	Dataset2
2	2	2	4	1	3	1	1	14.3326	0	19.9792	0	0	0	0	Dataset2
2	2	1	3	3	2	2	1	15.436	1	18.0697	0	0	0	0	Dataset2
2	2	2	1	3	1	1	1	14.1848	1	19.9219	0	0	0	0	Dataset2
2	2	2	2	4	1	1	1	14.9815	0	17.2248	0	0	0	0	Dataset2
2	1	1	5	2	2	4	4	14.3326	0	20	24	12	3	1	Dataset2
2	2	1	3	3	1	2	1	15.1403	0	16.917	0	0	0	0	Dataset2
2	2	1	6	2	3	2	1	15.5893	0	21.2585	29	0	0	0	Dataset2
2	2	2	1	3	1	1	1	12.052	0	17.8465	0	0	0	0	Dataset2
2	2	2	4	2	1	1	1	13.5305	0	16.2331	0	0	0	0	Dataset2

## Sheet: High- and Low-Risk Cohort
number.x	Gender	GE12	GE14	EPQN2	ASLEC6	SSRS8	BDI2	BDI7	BDI9	GE	EPQN	ASLEC	SSRS	BDI	Age	SuLevel	source
23151	男	0	0	0	1	4	0	0	0	1	0	0	25	6	21.9411	2	Dataset1
27207	女	0	0	0	1	2	0	0	0	0	0	0	15	1	22.1793	3	Dataset1
23200	女	0	0	1	2	2	2	1	0	1	11	26	13	36	22.8966	1	Dataset1
23201	男	0	0	0	1	2	0	0	0	1	7	7	13	21	21.1554	1	Dataset1
28203	男	0	0	0	2	2	0	0	0	1	0	25	19	0	22.8611	2	Dataset1
23769	女	0	0	1	2	2	0	2	0	0	9	22	9	22	21.577	1	Dataset1
23122	男	0	1	0	2	1	1	0	0	6	6	26	3	13	21.8508	1	Dataset1
23606	男	0	0	1	1	1	2	1	1	1	7	27	6	14	20.6105	2	Dataset1
25971	女	1	0	1	1	3	1	2	1	3	11	9	16	32	20.9802	2	Dataset1
25108	男	0	0	0	3	3	2	0	1	0	5	60	17	15	21.1499	1	Dataset1
25945	男	0	0	1	2	2	2	1	1	4	10	40	15	24	21.1499	1	Dataset1
25975	女	0	0	1	2	2	2	0	0	1	7	28	7	15	20.5804	2	Dataset1
27370	女	0	0	1	2	1	1	2	1	1	12	22	5	12	21.3443	1	Dataset1
25781	女	0	1	1	3	3	2	1	1	6	5	35	16	13	21.1499	1	Dataset1
22966	女	0	1	0	1	2	1	1	1	6	8	33	13	14	22.1821	2	Dataset1
26379	女	0	0	1	1	3	1	1	0	1	12	25	15	21	21.0568	1	Dataset1
13980	女	0	1	1	3	3	3	2	1	7	10	30	18	30	21.6235	2	Dataset1
25613	女	0	1	1	2	2	0	1	1	7	12	24	11	20	22.089	2	Dataset1
26578	女	0	0	1	2	3	1	0	1	3	12	28	16	16	22.538	2	Dataset1
25287	女	0	0	1	2	2	0	0	1	0	9	34	11	18	20.4326	1	Dataset1
25321	女	0	0	1	2	4	2	1	0	1	12	43	12	17	21.8152	1	Dataset1
25849	女	0	0	1	2	3	0	0	0	1	6	57	19	16	21.1499	1	Dataset1
25312	女	1	0	1	2	3	1	1	1	1	9	45	19	20	20.6954	1	Dataset1
25338	女	0	0	1	3	2	2	1	1	4	9	28	11	22	20.4216	1	Dataset1
25224	男	0	1	0	1	1	0	0	1	6	3	9	11	16	21.3881	1	Dataset1
26711	女	1	0	0	3	4	2	2	1	3	11	30	18	31	20.5503	2	Dataset1
26144	女	0	0	1	3	2	1	1	0	2	12	49	11	25	21.1745	2	Dataset1
26493	女	0	0	1	2	2	2	1	1	0	7	55	18	25	20.9254	2	Dataset1
27990	女	0	0	0	2	2	0	1	1	0	3	21	10	15	21.0623	1	Dataset1
23383	女	0	0	0	1	3	0	1	0	0	6	11	19	20	20.9008	1	Dataset1
26873	女	0	0	1	1	2	2	2	1	2	12	26	13	27	21.3415	2	Dataset1
27284	女	0	0	1	3	3	0	1	0	0	12	30	16	20	21.1006	1	Dataset1
27253	女	0	1	1	2	1	2	0	0	6	11	16	8	19	21.2594	2	Dataset1
25238	女	0	0	1	2	2	0	1	1	3	12	62	12	18	20.9446	2	Dataset1
24712	女	1	0	1	1	2	2	1	1	4	9	41	19	18	21.2649	2	Dataset1
26829	女	1	0	1	3	3	1	1	1	2	12	22	15	27	21.6153	2	Dataset1
23625	女	0	0	1	2	4	2	1	0	0	9	42	22	18	21.3306	1	Dataset1
25034	男	0	0	1	1	3	0	3	0	0	5	45	17	18	21.7029	1	Dataset1
25251	女	0	0	0	2	2	2	1	0	3	6	20	9	18	21.1499	1	Dataset1
25454	女	0	1	1	3	2	2	1	1	6	10	41	8	22	20.8104	2	Dataset1
23915	男	0	0	0	2	3	2	1	1	0	6	50	19	21	21.64	1	Dataset1
26823	男	0	0	1	4	2	3	2	0	1	10	46	11	30	21.5441	1	Dataset1
26733	女	0	0	0	2	2	2	2	0	3	7	33	10	25	20.3231	2	Dataset1
24088	女	1	1	1	2	3	0	1	1	8	5	32	18	15	21.7248	3	Dataset1
25257	男	0	0	1	1	3	2	1	1	2	12	35	21	31	20.3532	3	Dataset1
23929	女	0	0	1	2	2	2	1	0	0	12	28	11	18	21.1526	2	Dataset1
27453	女	0	0	0	2	2	2	0	1	0	3	14	10	20	20.1834	1	Dataset1
27579	女	0	0	1	2	3	2	1	1	0	4	26	12	20	21.1499	1	Dataset1
23574	女	0	0	1	2	2	2	2	1	0	10	21	9	21	20.271	1	Dataset1
27697	女	1	0	1	2	3	1	1	1	2	11	38	14	14	21.7221	2	Dataset1
26891	女	0	0	1	2	3	0	1	0	0	11	20	18	20	20.2628	1	Dataset1
23581	男	1	0	1	1	2	2	1	1	5	12	39	9	34	20.4873	2	Dataset1
25142	女	0	0	1	1	2	0	1	1	1	11	29	14	20	21.1499	1	Dataset1
24139	女	0	1	0	2	2	2	1	1	8	7	22	12	33	21.3662	2	Dataset1
25103	男	0	0	1	1	3	2	1	1	3	12	32	15	23	21.7385	1	Dataset1
23519	男	0	0	0	2	3	2	1	0	0	4	48	17	18	21.3388	1	Dataset1
24989	男	0	0	1	2	2	0	2	1	0	11	20	12	16	22.1383	1	Dataset1
24997	女	0	0	1	2	3	2	1	1	1	11	34	18	23	21.7194	2	Dataset1
23705	女	0	0	1	1	3	2	1	0	4	11	28	15	23	20.7337	1	Dataset1
23955	女	0	0	1	1	4	2	0	1	0	11	36	15	26	21.1554	1	Dataset1
23560	男	0	0	1	3	2	2	1	1	1	12	35	14	23	21.1554	1	Dataset1
27785	女	0	0	1	1	4	0	1	1	3	12	17	16	14	21.1499	1	Dataset1
23097	男	0	0	0	4	2	2	1	1	0	11	34	11	34	21.0513	3	Dataset1
23260	女	0	1	0	4	2	2	2	1	6	8	50	9	39	21.1554	2	Dataset1
23542	男	0	0	1	1	3	2	1	1	2	12	33	13	28	21.117	2	Dataset1
23307	男	0	1	1	3	2	2	3	2	7	12	59	6	42	21.1554	3	Dataset1
23286	女	0	0	1	3	4	3	0	0	0	12	35	24	19	21.1554	1	Dataset1
23147	男	0	0	1	3	2	3	0	1	1	4	48	9	38	22.9952	2	Dataset1
28891	男	0	0	1	1	2	0	0	0	0	12	48	12	21	21.2047	1	Dataset1
23872	男	0	0	1	2	2	0	1	0	1	12	59	15	15	20.7502	3	Dataset1
23449	男	0	0	1	3	2	3	1	1	1	12	50	16	27	22.193	2	Dataset1
28841	女	1	1	1	1	2	0	1	1	8	9	17	16	12	21.3142	2	Dataset1
25759	女	0	0	1	2	1	1	1	2	0	12	30	11	29	21.1499	1	Dataset1
23709	男	0	0	1	2	1	0	2	0	1	8	25	4	16	21.4702	2	Dataset1
23861	女	0	0	1	2	2	2	0	1	1	12	35	14	17	21.7714	2	Dataset1
28628	男	0	1	1	2	2	0	1	1	7	12	63	9	20	24.2683	1	Dataset1
28871	女	0	1	1	2	3	2	1	1	6	1	11	19	18	21.0103	1	Dataset1
27560	女	0	0	0	1	2	2	2	1	1	9	49	13	20	21.1499	1	Dataset1
17798	男	1	1	1	1	2	2	1	1	7	8	7	14	18	22.0534	2	Dataset1
24693	男	0	0	0	2	1	2	1	0	2	6	20	9	11	22.5462	1	Dataset1
17368	男	0	0	1	3	2	2	1	1	0	12	49	12	21	25.7577	1	Dataset1
27441	男	0	0	1	1	3	0	1	0	0	9	41	15	24	21.5469	2	Dataset1
27580	女	0	0	1	3	4	2	2	1	3	12	47	15	37	20.9966	1	Dataset1
27956	男	0	1	0	1	4	2	2	1	8	3	11	18	17	21.6865	1	Dataset1
27872	男	0	0	1	1	3	0	0	0	0	6	51	16	17	19.6824	1	Dataset1
25227	女	0	0	1	3	2	0	0	0	1	9	37	9	17	21.1882	1	Dataset1
24702	女	0	0	1	4	3	1	1	0	0	5	37	16	20	21.024	1	Dataset1
27382	女	0	0	1	2	3	0	0	0	0	11	20	21	3	20.449	1	Dataset1
29130	男	0	0	1	3	2	0	0	0	1	4	23	11	19	21.848	1	Dataset1
28393	男	0	0	1	1	3	2	1	0	1	9	6	11	17	21.3662	1	Dataset1
24678	女	0	1	1	1	2	0	2	1	6	7	19	12	13	20.7529	1	Dataset1
25494	女	0	0	1	2	3	0	2	1	2	10	39	15	27	20.397	1	Dataset1
15773	男	1	1	1	2	1	2	1	1	8	9	11	10	24	22.3518	2	Dataset1
23322	女	0	0	1	1	2	0	0	0	0	9	10	12	15	21.1554	1	Dataset1
29113	女	1	0	1	3	2	0	1	1	1	11	32	12	15	22.2396	1	Dataset1
28423	女	0	0	1	1	3	2	1	0	0	9	48	14	21	20.6735	1	Dataset1
28341	男	0	1	0	1	3	2	1	0	6	6	20	14	14	21.5934	1	Dataset1
28210	女	0	0	1	2	2	2	1	1	2	10	50	14	14	21.1499	1	Dataset1
28152	女	1	0	1	2	2	2	2	1	1	12	32	9	28	21.0787	2	Dataset1
23899	男	0	0	1	2	2	2	3	0	4	5	49	14	19	21.0568	1	Dataset1
28062	女	1	0	1	3	3	3	2	1	2	12	58	14	38	20.5476	2	Dataset1
28338	女	0	0	1	2	1	0	0	0	1	5	30	9	15	19.1376	3	Dataset1
28350	女	0	0	1	3	3	2	1	1	0	8	40	12	30	20.3313	2	Dataset1
24796	女	0	0	1	2	2	0	1	1	1	11	42	13	19	21.8316	2	Dataset1
28432	女	0	0	1	4	3	2	2	1	0	11	63	17	38	21.1034	2	Dataset1
27524	女	0	1	1	3	2	1	1	1	6	8	20	8	10	21.0568	1	Dataset1
28163	女	0	0	1	2	3	2	1	1	1	10	41	10	17	21.1499	2	Dataset1
28142	女	0	0	1	3	3	0	1	1	1	11	44	14	22	21.8261	1	Dataset1
15407	女	0	0	1	2	2	2	2	0	0	11	35	18	27	20.9884	2	Dataset1
14180	女	0	0	1	3	3	1	1	0	0	5	63	18	19	20.7912	1	Dataset1
14185	女	0	1	1	3	2	0	0	0	7	6	31	10	6	20.6899	1	Dataset1
14145	男	0	0	1	2	1	2	0	0	0	11	28	8	21	23.54	1	Dataset1
15418	女	0	0	0	3	1	0	0	1	0	8	48	16	15	21.8289	3	Dataset1
13659	女	0	0	1	3	2	2	1	1	0	12	42	13	16	21.1636	1	Dataset1
16717	女	0	0	1	2	3	1	1	1	0	6	40	19	16	20.7639	1	Dataset1
25868	女	0	0	1	3	3	2	1	1	0	12	24	20	20	20.7556	1	Dataset1
14478	女	0	1	1	3	3	0	0	0	6	8	41	17	6	20.4271	1	Dataset1
15301	女	0	1	1	1	4	1	1	1	9	11	37	21	24	21.1773	1	Dataset1
27902	女	0	0	1	3	3	2	1	1	1	10	47	14	24	21.1499	1	Dataset1
15215	女	0	0	1	3	3	0	0	0	0	9	49	18	19	22.3025	2	Dataset1
14393	女	0	0	0	2	3	2	1	0	1	6	45	17	23	21.7166	1	Dataset1
26069	女	0	0	0	1	1	1	1	1	0	8	8	9	21	21.0568	1	Dataset1
14081	男	0	0	1	2	3	1	1	1	0	12	23	15	21	21.5168	3	Dataset1
26204	男	0	0	1	1	3	1	0	1	1	10	25	14	18	19.5318	2	Dataset1
15268	女	0	0	0	2	3	0	1	0	1	6	25	10	15	20.6105	1	Dataset1
14548	女	0	0	1	4	3	3	2	1	0	11	51	17	36	21.4401	1	Dataset1
14568	男	0	0	1	1	1	0	1	1	0	5	8	2	25	20.9363	2	Dataset1
14094	女	0	0	1	4	3	2	2	1	0	12	35	16	33	22.3162	1	Dataset1
14877	女	0	0	1	4	4	0	1	1	0	8	40	22	20	20.8706	1	Dataset1
13862	女	0	0	1	3	2	2	1	1	1	12	40	8	24	20.5804	2	Dataset1
15768	女	0	1	1	1	3	2	1	2	8	9	22	14	26	20.95	2	Dataset1
25631	女	0	0	0	2	3	0	2	0	0	2	18	18	17	19.2389	1	Dataset1
15435	女	0	0	1	1	2	2	1	1	1	9	20	12	19	20.5394	1	Dataset1
26117	女	0	0	1	2	1	0	0	0	1	7	20	18	1	19.6194	1	Dataset1
14172	女	0	1	1	4	2	2	1	1	7	12	82	13	30	21.1992	3	Dataset1
14085	女	1	1	1	1	4	0	1	1	7	11	35	22	17	21.7933	2	Dataset1
26147	男	0	0	0	1	3	0	0	0	0	2	4	16	5	21.4428	2	Dataset1
25652	男	0	0	0	2	3	0	0	0	0	0	36	18	0	20.9692	1	Dataset1
14412	女	0	0	1	2	3	2	1	0	0	12	42	17	24	20.8597	2	Dataset1
14536	女	0	0	1	3	3	2	2	1	3	12	30	13	24	21.5359	1	Dataset1
14519	女	0	0	1	2	3	1	0	0	0	12	12	22	16	21.2101	1	Dataset1
14540	女	0	0	1	3	2	1	1	1	0	11	36	13	28	22.3135	3	Dataset1
26253	女	0	0	1	2	1	2	1	1	3	12	28	12	25	19.0363	3	Dataset1
26477	女	0	0	0	1	2	2	1	0	3	0	9	13	17	21.1499	1	Dataset1
13900	女	0	0	1	2	2	2	2	1	1	7	14	12	23	21.3525	3	Dataset1
28194	男	0	0	1	2	2	1	1	1	4	4	18	9	21	19.4935	1	Dataset1
26600	女	1	0	0	2	3	0	0	0	2	2	14	21	1	19.6578	2	Dataset1
28401	女	0	0	1	3	2	0	1	0	0	11	56	13	14	19.5702	2	Dataset1
27403	女	0	0	1	1	3	0	0	1	0	9	5	18	1	19.9535	1	Dataset1
27222	女	0	0	1	2	3	0	0	1	1	7	31	15	21	19.7344	1	Dataset1
14334	女	0	0	1	4	2	2	3	0	2	12	30	12	22	21.1526	1	Dataset1
14385	女	0	0	1	3	3	1	1	1	1	10	45	13	23	21.9877	2	Dataset1
23580	男	0	0	1	1	2	0	1	1	0	5	30	13	18	20.0383	1	Dataset1
27131	男	0	0	0	1	3	2	1	0	0	1	47	20	14	20.0192	1	Dataset1
26819	女	0	0	0	1	3	0	0	0	0	2	22	14	8	19.1485	1	Dataset1
27279	女	0	0	0	2	2	0	0	0	0	5	8	5	0	20.1068	1	Dataset1
14033	女	0	0	1	3	3	2	1	0	0	10	39	17	15	20.7173	1	Dataset1
17774	男	0	0	1	3	1	1	1	0	0	7	37	14	16	22.2998	1	Dataset1
26602	女	0	0	1	2	2	0	0	0	1	5	38	15	14	20.8405	1	Dataset1
25858	女	0	0	0	1	3	0	1	1	0	7	34	15	6	21.1499	1	Dataset1
14400	女	0	0	1	4	2	2	1	1	3	11	24	13	29	20.6735	2	Dataset1
14488	女	0	0	1	4	3	2	2	1	0	11	52	18	35	21.013	2	Dataset1
14487	女	0	0	1	2	3	2	2	2	0	4	43	16	31	20.9856	1	Dataset1
14228	女	0	0	1	3	4	1	2	0	0	6	51	17	24	20.3285	1	Dataset1
13651	女	1	0	1	2	3	1	2	2	2	8	35	13	33	20.7365	2	Dataset1
13990	女	0	0	1	3	3	1	2	2	2	3	49	16	47	22.3162	3	Dataset1
13899	女	0	1	1	2	2	0	1	1	8	10	55	13	17	21.347	1	Dataset1
13879	女	1	1	1	2	3	1	1	1	8	11	34	14	26	22.9897	1	Dataset1
27141	男	0	0	1	2	3	0	0	0	0	5	26	19	0	19.666	1	Dataset1
26881	女	0	0	0	2	2	0	1	0	0	3	9	14	9	19.9425	1	Dataset1
27094	女	0	0	0	1	2	2	2	0	3	3	17	12	12	19.165	1	Dataset1
26557	女	0	0	1	2	2	1	0	0	1	5	13	17	2	18.6064	1	Dataset1
14325	女	0	0	1	2	3	2	2	1	0	11	17	15	31	21.3114	2	Dataset1
26242	女	0	0	0	1	3	0	0	1	0	2	20	19	3	21.8234	1	Dataset1
25983	女	0	0	1	3	2	0	0	0	0	10	50	18	11	20.1396	1	Dataset1
26440	女	0	0	1	2	2	0	1	0	0	7	18	18	5	20.4517	1	Dataset1
26403	女	0	0	1	2	3	0	1	1	0	12	11	14	12	19.6057	1	Dataset1
23043	女	0	0	0	1	3	0	0	0	0	0	1	19	0	21.1554	1	Dataset1
26685	女	0	0	0	3	2	0	0	0	0	3	15	12	2	20.7201	1	Dataset1
26768	女	0	1	1	1	2	0	1	1	7	12	23	13	18	21.0623	1	Dataset1
25837	女	0	0	0	2	2	0	0	0	0	6	19	14	12	19.2827	1	Dataset1
26741	女	0	0	1	2	2	0	1	1	0	2	30	15	24	19.3593	2	Dataset1
26252	女	0	0	1	2	3	0	1	1	0	6	59	14	18	20.1259	1	Dataset1
14120	女	0	0	1	2	4	2	1	1	3	11	33	20	18	21.3662	1	Dataset1
25753	女	0	0	0	1	3	0	0	0	3	7	9	17	1	20	1	Dataset1
27025	女	0	0	1	1	3	0	0	0	0	3	0	18	7	20.1314	1	Dataset1
23218	女	0	0	0	1	3	0	0	0	1	0	5	18	1	20.6461	1	Dataset1
25919	女	0	0	0	2	2	0	1	0	0	4	20	14	12	20.5859	1	Dataset1
25262	女	0	0	0	1	3	0	0	0	0	2	0	22	0	20.063	1	Dataset1
26359	女	0	0	0	1	1	0	0	0	1	3	3	3	0	19.3347	1	Dataset1
26122	女	0	0	1	2	4	0	1	1	0	10	40	18	13	21.1499	1	Dataset1
26231	女	0	0	1	1	4	2	1	1	0	12	16	17	23	19.5975	1	Dataset1
14352	女	0	0	1	1	2	0	1	1	1	10	33	8	19	21.0568	2	Dataset1
26825	女	0	0	1	1	3	0	1	0	1	12	14	10	13	19.8111	1	Dataset1
27087	女	0	0	1	3	1	2	1	1	0	11	10	10	24	20.8953	2	Dataset1
25790	女	0	0	1	3	2	0	1	1	1	6	30	14	12	20.334	1	Dataset1
13957	女	0	1	1	2	1	1	1	1	6	8	37	11	26	22.0151	3	Dataset1
26643	女	0	0	1	2	3	2	1	1	1	7	2	18	23	21.1499	2	Dataset1
13982	女	0	0	1	1	1	1	0	1	3	11	16	5	23	22.3162	2	Dataset1
26097	女	0	1	1	3	2	0	0	0	6	9	40	13	12	20.115	1	Dataset1
26697	女	0	0	1	4	3	2	3	2	1	11	21	10	28	19.9124	3	Dataset1
26323	女	0	0	0	1	1	0	0	0	0	8	4	16	1	20.1177	2	Dataset1
14159	女	0	0	1	2	3	2	1	1	0	11	35	13	20	20.7146	2	Dataset1
27385	女	0	0	0	2	2	2	1	0	0	7	21	12	18	21.1499	1	Dataset1
25950	女	0	1	1	1	3	1	1	1	7	11	35	16	19	20.9692	1	Dataset1
19140	女	0	0	1	2	3	2	1	1	0	12	32	15	27	22.2888	2	Dataset1
18680	女	0	1	1	2	3	2	1	1	7	12	34	12	38	21.5962	1	Dataset1
18596	女	0	0	1	1	2	2	1	0	0	11	55	16	20	21.128	1	Dataset1
18207	男	0	1	1	3	3	2	1	1	8	12	53	14	32	22.2916	2	Dataset1
16988	女	0	1	1	2	2	1	2	1	7	11	28	13	28	21.2238	2	Dataset1
23509	男	1	0	0	2	2	0	0	0	1	8	40	14	0	21.1554	2	Dataset1
23547	男	0	1	1	1	2	0	1	1	6	5	10	8	12	19.154	1	Dataset1
18551	女	0	1	0	1	3	2	1	2	9	11	46	17	25	20.7912	3	Dataset1
18538	女	0	0	1	4	1	2	1	1	0	7	20	9	19	20.8214	2	Dataset1
18671	女	0	0	1	3	3	2	2	1	0	10	57	17	32	21.9986	1	Dataset1
18449	男	0	0	1	3	2	0	1	1	2	11	49	14	28	24.4517	1	Dataset1
18405	女	1	0	0	2	2	0	1	0	1	11	12	15	16	20.2628	1	Dataset1
18506	男	0	1	1	4	3	2	1	1	8	7	39	17	11	21.3717	1	Dataset1
18462	男	0	0	1	4	2	2	1	1	0	11	60	13	25	20.6927	2	Dataset1
23488	女	0	0	1	1	1	0	0	0	0	3	4	13	2	19.9562	1	Dataset1
27707	女	0	0	0	1	1	0	0	0	0	1	1	10	3	20.1232	1	Dataset1
16382	女	0	0	1	4	3	3	1	0	0	11	35	15	16	22.141	1	Dataset1
18495	女	1	1	1	2	3	0	2	3	8	8	13	15	21	21.295	3	Dataset1
18215	女	0	1	1	2	3	2	1	1	7	10	30	20	17	20.9993	1	Dataset1
18624	女	0	0	1	2	3	2	1	1	3	7	54	15	22	21.1335	1	Dataset1
23602	女	0	0	0	1	2	2	0	0	0	3	16	13	5	18.5298	2	Dataset1
19159	女	0	0	0	2	2	2	1	1	0	5	46	15	32	22.2888	1	Dataset1
18768	女	0	0	1	1	4	0	1	1	2	12	28	17	28	19.5729	1	Dataset1
13997	男	0	0	0	1	3	2	1	0	1	4	11	12	16	22.3162	2	Dataset1
18769	女	1	0	0	3	3	1	2	1	2	10	17	11	31	22.1547	2	Dataset1
18755	女	0	0	1	1	3	2	1	1	1	12	47	15	18	20.5832	2	Dataset1
15546	男	0	0	1	1	2	2	2	2	2	3	0	2	32	22.3025	1	Dataset1
18735	男	0	0	1	3	2	2	1	1	3	10	38	14	22	20.2409	2	Dataset1
27404	女	0	0	0	1	3	0	0	0	1	0	2	17	0	19.718	1	Dataset1
18268	女	0	0	1	3	3	2	1	1	1	11	54	13	25	20.8652	1	Dataset1
18208	男	0	1	1	2	2	0	0	0	6	8	19	17	9	22.2916	1	Dataset1
18201	女	1	1	1	3	3	2	1	1	8	12	31	16	24	20.846	3	Dataset1
18581	女	0	0	1	1	3	0	1	1	0	11	20	19	16	20.3066	1	Dataset1
23402	女	0	0	0	3	3	0	0	0	0	3	8	13	0	20.2491	1	Dataset1
23471	男	0	0	1	2	1	1	0	0	1	12	34	12	11	21.1554	1	Dataset1
26902	女	0	0	1	1	3	0	1	1	1	12	22	16	16	19.6851	1	Dataset1
25002	女	0	0	1	3	3	2	1	0	0	11	28	12	15	21.1499	1	Dataset1
18843	女	0	0	1	4	4	1	1	0	1	11	41	19	27	21.1417	2	Dataset1
19083	女	1	1	1	1	3	2	1	2	10	12	23	13	27	20.6653	4	Dataset1
18022	女	0	0	0	2	2	2	1	1	2	8	36	12	20	21.1554	1	Dataset1
18085	女	0	0	1	2	2	1	1	1	4	10	44	15	20	21.4292	1	Dataset1
24771	男	0	0	0	1	2	0	0	0	0	0	19	17	1	21.1061	2	Dataset1
17837	女	1	0	1	3	1	0	1	1	3	10	39	6	19	22.2971	1	Dataset1
24695	女	0	0	1	3	3	0	0	1	0	7	21	16	16	19.5318	1	Dataset1
17174	女	0	0	1	4	2	0	1	1	0	8	35	17	16	21.0431	2	Dataset1
16994	女	0	0	1	1	2	2	2	0	1	12	14	15	15	23.1841	1	Dataset1
16721	女	0	0	1	2	3	0	0	0	4	12	20	21	15	22.7734	1	Dataset1
25000	女	0	0	0	2	3	0	0	0	0	1	16	17	2	21.0541	1	Dataset1
17844	男	1	0	1	4	2	2	1	1	2	12	41	17	18	22.2971	1	Dataset1
17710	女	0	0	0	2	3	2	2	0	1	5	42	22	29	22.2971	1	Dataset1
17855	男	0	0	1	2	3	2	2	1	3	5	42	14	30	20.5777	1	Dataset1
16678	男	0	0	0	2	2	1	2	2	0	3	27	9	27	22.2998	2	Dataset1
23982	男	0	0	0	1	3	0	0	0	0	0	2	19	4	21.1554	1	Dataset1
29175	女	0	0	0	1	3	0	1	0	1	6	11	16	8	20.4408	1	Dataset1
23694	男	0	0	0	2	1	0	0	0	0	2	17	10	6	20.1123	1	Dataset1
27650	男	0	0	0	1	2	0	0	0	1	0	17	11	2	21.1499	1	Dataset1
27878	男	0	0	1	1	2	0	0	0	0	10	42	17	12	19.8741	1	Dataset1
25488	男	0	0	0	3	3	2	1	2	0	0	55	10	25	21.8289	1	Dataset1
28063	女	0	0	0	3	2	1	0	0	0	0	54	8	17	19.3183	1	Dataset1
28780	女	0	0	0	1	3	0	0	0	0	2	14	18	6	19.2909	1	Dataset1
28779	女	0	0	0	2	3	0	1	0	0	2	15	19	7	19.655	1	Dataset1
27556	男	0	0	1	2	2	0	0	1	0	10	48	16	8	21.1499	1	Dataset1
29137	男	0	0	0	2	3	2	2	2	1	0	30	18	40	21.1499	2	Dataset1
13677	女	0	1	0	2	2	2	1	1	7	10	23	8	24	20.4381	2	Dataset1
16212	男	0	0	1	1	2	1	1	1	0	12	46	16	23	22.3025	3	Dataset1
16491	女	0	0	1	1	3	0	1	1	0	9	27	15	22	22.3025	2	Dataset1
25520	女	0	0	1	2	2	3	2	1	1	10	11	10	27	19.8001	2	Dataset1
15929	男	0	0	1	5	4	3	0	0	4	11	40	14	30	21.0021	1	Dataset1
16478	女	0	0	1	4	2	2	1	0	0	12	30	12	20	21.6153	1	Dataset1
16001	男	0	0	1	2	2	0	1	0	0	9	37	18	21	20.8323	1	Dataset1
23002	女	0	0	0	2	3	0	0	0	0	0	27	23	0	19.2854	1	Dataset1
28823	女	1	1	0	3	2	0	1	0	7	3	40	13	12	20.1259	1	Dataset1
16512	男	0	1	0	2	2	1	0	1	8	8	61	15	16	22.3025	1	Dataset1
29144	女	0	0	0	2	3	0	0	0	0	7	33	17	0	20.2574	1	Dataset1
28867	男	0	0	0	2	3	0	0	0	0	1	9	21	0	19.9507	1	Dataset1
24788	女	0	0	1	2	3	0	1	1	1	11	27	16	19	19.5127	2	Dataset1
19036	男	0	0	1	2	2	1	2	1	5	11	20	10	28	19.8658	1	Dataset1
16355	女	0	0	1	2	1	0	0	1	0	8	13	14	18	20.8296	1	Dataset1
14444	女	1	0	1	3	2	1	2	1	4	10	21	10	24	20.9117	2	Dataset1
7665	男	0	0	1	1	2	0	0	0	0	9	39	15	14	22.1465	1	Dataset1
27742	女	0	0	1	1	4	0	0	0	0	5	8	27	0	19.499	1	Dataset1
29174	男	0	0	1	2	1	2	0	3	0	12	60	13	21	20.3121	2	Dataset1
29290	女	0	0	1	2	3	0	1	1	2	10	30	15	29	20.271	2	Dataset1
14884	女	0	0	1	3	2	0	1	0	1	9	52	13	17	21.0541	1	Dataset1
28596	男	0	0	1	2	3	0	1	0	1	3	41	19	9	20.4162	1	Dataset1
28934	女	0	0	1	2	2	0	1	0	0	8	15	16	13	19.258	2	Dataset1
28279	男	0	0	0	2	3	1	1	0	0	1	16	18	7	20.1506	2	Dataset1
25960	男	1	0	1	1	1	2	1	1	1	8	39	7	14	19.6523	1	Dataset1
19041	男	0	1	1	1	3	0	0	1	7	8	12	14	14	21.4839	3	Dataset1
29149	男	0	0	1	1	2	0	0	0	0	5	22	16	1	19.269	1	Dataset1
28945	女	0	0	0	1	3	0	0	0	0	1	2	14	4	19.3429	1	Dataset1
28944	男	0	0	1	1	3	0	0	0	0	7	3	18	0	19.5154	1	Dataset1
16279	男	0	0	1	3	1	0	0	0	1	11	39	10	9	21.0979	1	Dataset1
24413	女	0	0	0	4	2	0	1	0	0	3	43	14	14	19.7563	1	Dataset1
29169	男	0	0	0	1	2	0	0	0	1	2	2	14	0	19.5483	3	Dataset1
16972	男	0	0	1	3	3	2	1	1	4	10	37	14	22	21.5962	1	Dataset1
16915	男	0	1	0	1	3	2	2	3	7	2	29	16	36	21.3881	2	Dataset1
17066	男	0	0	1	1	4	3	1	1	0	12	28	20	39	20.8378	2	Dataset1
17151	女	0	0	1	2	1	0	2	1	1	8	41	15	24	22.2998	1	Dataset1
17097	女	1	1	1	1	3	1	1	0	8	11	19	17	28	21.5934	2	Dataset1
15642	女	0	0	1	2	2	1	1	1	2	10	38	17	20	20.742	3	Dataset1
18376	男	0	0	0	3	3	2	1	0	0	6	44	15	23	21.1417	1	Dataset1
17133	女	1	0	1	3	1	1	1	0	3	12	38	10	14	22.2998	1	Dataset1
16909	女	0	1	1	2	2	2	1	1	7	12	18	12	13	20.6735	1	Dataset1
17172	女	0	0	1	2	1	1	1	1	0	8	29	4	23	21.1225	2	Dataset1
16729	男	1	0	1	1	2	2	1	1	4	11	20	11	14	20.8214	2	Dataset1
17149	男	0	0	1	2	1	2	1	1	2	8	26	11	20	21.0623	1	Dataset1
29386	男	0	0	1	2	2	1	0	0	0	10	36	15	14	19.436	1	Dataset1
29006	男	0	0	0	2	3	0	0	0	0	1	30	21	6	19.8522	1	Dataset1
16942	女	0	0	1	2	2	3	2	2	0	12	14	17	32	20.2738	2	Dataset1
27717	男	0	0	0	1	3	0	0	0	0	9	3	17	0	21.1499	1	Dataset1
16801	女	0	0	1	2	2	0	2	1	0	12	33	12	20	21.1088	1	Dataset1
17092	女	1	0	1	2	2	1	1	1	2	3	42	11	27	20.3806	3	Dataset1
25024	女	0	0	1	4	2	2	1	1	3	10	36	11	22	21.1444	1	Dataset1
28125	男	0	0	0	2	3	0	1	0	0	3	28	17	8	19.8001	1	Dataset1
17095	男	0	0	1	2	2	1	1	1	1	8	29	12	24	20.7502	2	Dataset1
17313	男	0	0	1	3	2	0	1	1	0	11	55	11	12	21.9658	1	Dataset1
17372	男	0	0	0	3	2	2	1	2	2	1	50	12	26	21.1253	2	Dataset1
7017	女	1	0	1	1	3	0	2	1	2	11	24	21	17	21.6564	1	Dataset1
16767	女	0	0	1	2	2	2	1	1	0	11	26	12	23	22.2998	2	Dataset1
28523	女	0	0	1	1	2	2	1	2	2	11	14	7	29	19.4114	2	Dataset1
29497	女	1	0	1	1	2	0	1	0	2	6	2	11	22	21.1499	1	Dataset1
16782	男	1	0	0	2	2	1	1	1	4	5	44	8	23	22.2998	1	Dataset1
15426	男	0	0	1	1	1	2	1	1	3	9	10	7	26	22.5188	2	Dataset1
15973	女	0	0	0	2	2	2	1	1	0	10	23	11	19	21.4784	2	Dataset1
17178	女	0	0	0	2	3	0	1	0	4	5	42	15	18	21.5387	1	Dataset1
16623	女	1	1	0	2	2	2	1	0	9	10	20	15	32	21.2074	2	Dataset1
16982	男	0	0	0	2	2	0	1	1	2	5	26	8	17	21.3251	1	Dataset1
16784	女	0	0	1	1	4	2	2	0	0	11	37	15	25	23.1102	1	Dataset1
25373	男	1	0	1	1	2	0	0	0	1	2	6	14	6	21.1499	1	Dataset1
16986	女	0	0	1	3	4	2	1	0	0	9	49	20	24	20.6297	1	Dataset1
18147	男	0	0	0	1	1	2	2	0	0	5	6	11	14	20.6133	1	Dataset1
27343	女	0	0	1	2	3	2	1	0	1	11	45	15	11	20.4162	2	Dataset1
15792	男	0	0	0	3	3	2	2	0	0	4	54	16	25	22.0397	1	Dataset1
16129	男	0	0	1	2	2	1	2	0	3	12	15	17	25	21.5524	1	Dataset1
27928	女	0	0	0	1	3	2	1	0	0	7	19	13	16	20.1506	1	Dataset1
23407	男	0	0	1	2	1	2	1	0	0	11	59	9	17	20.3614	2	Dataset1
14641	女	0	1	1	1	3	0	0	0	10	10	48	11	7	21.4921	1	Dataset1
15194	女	0	0	1	1	3	1	1	1	0	12	11	16	23	20.1752	2	Dataset1
15878	女	0	0	1	4	2	3	1	1	3	12	19	9	26	20.7639	2	Dataset1
15952	男	0	0	1	3	2	2	3	2	4	12	28	10	28	22.3025	2	Dataset1
15894	男	0	0	1	5	1	0	1	0	0	12	7	10	16	21.7687	1	Dataset1
14475	女	1	0	1	2	2	2	1	0	2	8	13	12	28	22.3107	1	Dataset1
28086	男	0	0	0	1	3	0	0	0	0	4	14	16	4	19.6222	2	Dataset1
28703	女	0	0	0	1	3	0	0	0	0	3	9	17	0	19.3292	1	Dataset1
15663	女	0	0	1	3	3	2	1	0	3	12	33	14	22	20.7064	1	Dataset1
24032	女	0	0	1	2	2	1	1	1	0	8	26	13	17	25.0404	2	Dataset1
24934	女	0	0	0	1	3	0	0	0	0	0	0	22	0	19.1896	1	Dataset1
10167	女	0	0	1	3	3	2	1	0	0	12	24	17	20	20.5147	1	Dataset1
5364	女	0	1	1	3	3	3	1	1	7	9	37	18	33	21.2649	3	Dataset1
27342	女	0	0	1	2	4	0	0	0	0	6	39	26	3	19.1485	1	Dataset1
23529	女	0	0	0	1	3	0	0	0	0	0	3	21	1	20.2656	1	Dataset1
26736	女	0	0	0	2	4	0	0	0	2	4	12	18	3	19.3593	1	Dataset1
26281	女	0	0	0	1	3	0	0	0	1	4	22	14	1	19.6742	1	Dataset1
26723	女	0	0	1	3	1	1	1	0	3	11	51	16	20	20.1533	1	Dataset1
3381	男	0	0	1	2	1	1	2	0	2	8	31	12	23	20.8569	1	Dataset1
26123	男	0	0	1	1	2	0	1	0	0	10	28	19	5	19.1485	1	Dataset1
8950	女	0	0	1	2	3	0	1	1	0	6	37	16	14	20.449	1	Dataset1
26247	女	0	0	0	1	2	0	0	0	1	6	6	13	11	19.0171	1	Dataset1
5360	女	0	0	1	5	1	2	3	1	1	10	29	10	20	21.4401	2	Dataset1
26142	女	0	0	1	2	2	2	1	0	0	6	19	17	17	18.6366	1	Dataset1
14785	女	0	1	1	2	3	2	1	0	7	11	13	18	19	20.3039	1	Dataset1
4497	女	0	0	0	2	3	1	1	1	1	5	36	14	17	21.473	1	Dataset1
14756	女	1	0	1	1	1	1	1	1	3	12	31	11	31	20.3039	1	Dataset1
26889	女	0	0	1	2	1	0	1	0	1	6	12	8	6	19.1485	2	Dataset1
26934	女	0	0	1	1	2	0	1	0	1	4	14	9	8	20.3641	2	Dataset1
25413	女	0	0	1	3	3	0	1	1	4	9	39	18	15	19.2827	1	Dataset1
10124	女	0	0	1	1	4	2	1	0	0	9	40	20	17	21.2594	1	Dataset1
26048	女	0	0	1	1	3	0	1	1	0	5	10	16	14	19.1485	1	Dataset1
26702	男	0	0	0	2	4	0	0	0	0	0	48	27	5	19.1485	1	Dataset1
14754	男	1	0	1	3	3	2	1	1	1	5	38	23	26	20.8789	2	Dataset1
14099	男	0	0	1	1	3	0	1	2	0	12	1	22	30	21.358	3	Dataset1
5088	女	0	1	1	4	3	2	1	0	8	7	15	15	19	20.794	1	Dataset1
26895	女	0	0	1	3	2	2	1	1	2	9	31	13	18	19.1485	1	Dataset1
15147	女	0	0	1	3	3	3	1	1	0	12	33	16	34	21.0486	3	Dataset1
4802	女	0	0	1	2	3	2	1	1	2	11	42	13	26	22.2669	1	Dataset1
26991	女	0	0	1	2	3	2	1	1	0	8	26	19	26	19.1485	2	Dataset1
26435	女	0	0	1	1	2	0	1	0	0	6	10	9	10	19.8905	1	Dataset1
5093	女	0	0	0	2	2	0	1	0	0	8	25	10	14	21.2649	2	Dataset1
5109	男	1	1	0	1	2	1	1	1	9	7	21	5	18	21.2649	2	Dataset1
26096	男	0	0	1	4	2	0	0	0	1	10	37	9	12	18.5599	1	Dataset1
4955	女	0	0	1	3	2	0	1	1	0	10	62	13	15	21.2266	2	Dataset1
26513	女	0	0	0	2	2	0	1	0	0	5	29	16	21	19.3785	2	Dataset1
6277	女	0	0	1	3	3	1	1	0	1	7	55	13	25	24.6078	2	Dataset1
26650	女	0	0	0	2	1	0	2	0	0	11	8	9	15	19.1485	1	Dataset1
26036	女	0	0	1	1	2	0	1	0	1	7	34	11	12	19.1485	1	Dataset1
15081	男	0	0	1	2	3	2	1	1	1	10	37	17	21	20.3149	1	Dataset1
15478	男	0	0	1	2	2	1	1	1	0	6	32	11	16	21.0157	1	Dataset1
5173	男	1	1	1	3	3	0	0	1	9	10	60	16	16	21.7166	2	Dataset1
5105	男	0	0	1	1	2	2	1	1	1	11	47	14	28	21.2649	1	Dataset1
14959	男	0	0	1	4	3	2	1	0	0	10	53	20	17	19.9589	1	Dataset1
25532	男	0	0	1	1	2	0	1	0	0	5	5	16	7	19.1485	1	Dataset1
7795	女	0	0	1	2	4	2	1	1	0	6	49	22	22	20.9528	1	Dataset1
26285	女	0	0	1	1	1	0	0	1	0	5	38	15	9	19.1485	1	Dataset1
25872	女	0	0	1	2	2	2	1	1	1	8	23	17	22	19.0281	1	Dataset1
26026	女	0	0	1	1	2	2	1	1	2	8	26	11	22	19.3539	1	Dataset1
25496	女	0	0	0	2	3	0	1	0	0	5	6	13	14	19.6468	1	Dataset1
10140	男	0	0	1	2	3	2	1	1	1	12	61	17	24	20.4654	2	Dataset1
6231	男	0	0	0	2	2	2	1	0	0	2	51	12	15	22.8693	1	Dataset1
25747	男	0	0	0	1	3	0	0	0	0	0	30	19	0	19.1485	2	Dataset1
4057	男	0	0	1	1	1	1	1	1	5	12	21	5	22	21.4593	1	Dataset1
3310	男	0	0	0	5	2	2	1	1	0	10	19	6	25	21.2676	1	Dataset1
15619	女	0	0	1	3	2	0	1	1	0	7	19	10	16	21.1964	2	Dataset1
26822	女	0	0	0	1	3	0	1	0	0	7	8	20	16	18.757	1	Dataset1
26273	女	0	0	1	4	3	0	1	0	0	11	19	13	17	19.2142	1	Dataset1
27172	女	0	0	0	2	2	0	0	0	1	4	27	16	10	18.987	2	Dataset1
26439	女	0	0	1	1	2	0	1	1	1	8	11	13	7	20.6817	1	Dataset1
26574	女	0	0	0	1	2	0	1	0	0	3	9	16	10	19.3593	1	Dataset1
25970	女	0	0	1	3	2	0	1	0	1	9	26	13	11	19.6003	2	Dataset1
14802	女	0	0	0	1	4	0	0	0	0	2	12	19	0	20.3012	1	Dataset1
6350	男	0	0	1	2	3	2	1	1	0	3	46	17	19	22.1246	2	Dataset1
26920	男	0	0	0	2	2	1	1	0	1	6	20	9	11	19.6632	1	Dataset1
26349	男	0	0	1	2	3	0	1	0	2	7	59	13	4	19.1786	1	Dataset1
26569	男	0	0	1	2	1	0	1	0	0	6	32	13	15	19.1732	1	Dataset1
26355	女	0	0	0	2	2	0	1	1	1	3	27	13	20	20.4134	2	Dataset1
26979	女	0	0	1	1	3	0	0	0	0	7	8	19	1	19.3183	1	Dataset1
15214	女	0	0	0	1	4	0	0	0	0	2	8	23	3	20.4298	3	Dataset1
26611	女	0	0	0	2	3	0	0	0	0	7	13	17	3	19.1485	1	Dataset1
25914	女	0	0	0	1	2	0	0	0	0	0	0	11	0	19.1485	2	Dataset1
4353	女	0	0	1	2	4	0	2	1	0	8	44	21	39	21.1034	2	Dataset1
26722	女	0	0	1	1	2	0	1	0	0	8	26	10	20	19.3676	1	Dataset1
25421	女	0	0	1	1	2	0	0	0	0	3	0	7	0	19.1485	1	Dataset1
25848	男	0	0	1	2	3	0	0	0	2	6	34	24	13	20.3641	1	Dataset1
4231	女	1	0	1	5	2	2	3	2	2	11	44	10	38	22.1054	3	Dataset1
3301	女	0	0	1	3	3	0	1	1	2	11	54	17	19	21.6537	2	Dataset1
14662	女	0	0	1	3	2	2	1	1	1	10	59	9	20	20.3039	2	Dataset1
26828	女	0	0	1	1	3	0	1	0	0	9	39	12	12	19.2553	3	Dataset1
14955	女	0	0	1	2	2	0	0	1	0	10	54	16	16	20.8569	1	Dataset1
3349	女	0	0	1	2	3	2	1	0	1	11	27	18	31	21.3032	2	Dataset1
25974	女	0	0	1	1	3	0	0	0	0	6	5	14	3	19.3703	2	Dataset1
25926	女	0	0	0	2	3	0	1	1	0	10	36	17	18	19.54	1	Dataset1
25905	女	0	0	0	2	3	2	2	1	0	2	24	14	13	18.6612	1	Dataset1
26110	女	0	0	0	3	2	0	1	0	0	0	22	19	5	21.7714	1	Dataset1
26032	女	0	0	1	2	2	2	0	1	0	7	27	13	23	18.9487	2	Dataset1
26717	男	0	0	1	3	3	2	1	1	0	11	24	16	15	18.7351	2	Dataset1
5567	男	0	0	1	3	3	2	1	1	3	4	62	20	21	20.8296	1	Dataset1
15019	女	0	0	1	2	4	0	1	0	3	5	27	21	9	19.781	3	Dataset1
26624	女	0	0	1	2	3	0	0	0	1	10	39	18	9	18.653	1	Dataset1
26760	女	0	0	1	2	2	0	0	1	1	4	37	19	2	19.1485	1	Dataset1
26282	女	0	0	1	2	2	0	0	0	2	9	22	9	10	17.9439	1	Dataset1
26566	女	0	0	0	1	3	0	0	0	2	2	38	18	10	18.8309	1	Dataset1
4631	女	0	1	1	1	3	0	1	2	8	7	3	18	16	21.3689	2	Dataset1
3281	男	1	0	1	3	1	2	0	0	3	12	8	11	15	20.564	2	Dataset1
8116	男	0	0	1	3	4	3	0	1	0	12	35	21	23	21.3662	1	Dataset1
27360	女	0	1	0	1	3	0	0	1	6	6	21	11	13	19.4497	1	Dataset1
27066	女	0	0	1	2	2	0	0	0	0	11	21	10	10	19.4634	1	Dataset1
9663	女	0	0	0	3	3	0	1	1	2	4	35	21	17	22.1136	1	Dataset1
14723	女	0	0	1	1	3	0	0	0	0	2	0	18	0	20.3039	1	Dataset1
27391	女	0	0	0	1	4	0	0	0	1	2	0	24	0	18.5133	1	Dataset1
27359	女	0	0	0	1	3	0	1	0	1	4	6	15	8	17.2211	0	Dataset1
26390	女	0	0	1	1	3	0	0	0	1	3	8	19	3	19.1485	0	Dataset1
26698	女	0	0	0	1	3	0	0	0	1	0	0	21	0	18.6174	0	Dataset1
27093	女	0	0	0	1	3	0	1	1	0	3	40	18	5	20.7584	0	Dataset1
5929	女	0	0	1	2	3	0	1	0	2	12	31	17	15	20.9172	0	Dataset1
26927	女	0	0	0	1	3	0	0	0	0	2	1	18	0	18.6804	0	Dataset1
27335	女	0	0	1	1	3	0	0	0	0	4	6	15	3	19.0992	0	Dataset1
26715	女	0	0	0	1	4	0	0	0	2	2	26	19	3	19.1485	0	Dataset1
14961	女	0	0	1	2	4	0	1	1	2	11	31	25	16	21.232	1	Dataset1
26869	女	0	0	0	1	3	0	1	0	0	0	13	19	8	19.2608	1	Dataset1
27350	男	0	0	0	1	3	0	0	0	0	0	4	19	0	18.6256	0	Dataset1
27389	男	0	0	0	2	3	0	1	0	0	2	23	14	15	18.9569	1	Dataset1
4694	男	0	1	1	2	1	1	2	1	6	4	18	10	25	21.1444	2	Dataset1
26104	男	0	0	0	1	3	0	0	0	0	1	6	14	7	19.1485	0	Dataset1
26504	女	0	0	0	1	4	0	0	0	0	2	6	24	0	19.2334	0	Dataset1
26727	女	0	0	0	1	3	0	0	0	0	1	12	13	0	19.0637	0	Dataset1
25422	女	0	0	0	1	3	0	1	0	0	5	8	17	12	19.1814	0	Dataset1
6057	女	0	1	1	3	3	2	0	0	6	9	54	18	19	21.2621	0	Dataset1
26676	女	0	0	1	1	3	0	1	0	2	5	18	22	7	19.0198	0	Dataset1
26442	女	0	0	0	2	3	0	0	0	0	0	14	18	0	19.1485	0	Dataset1
28694	女	0	0	0	1	2	0	0	0	0	3	2	16	5	18.8337	0	Dataset1
26010	女	0	0	0	2	3	0	0	0	1	6	20	18	6	19.8001	0	Dataset1
26965	女	0	0	0	1	3	0	0	0	0	0	0	25	0	19.0034	0	Dataset1
6323	女	0	0	1	2	4	2	1	1	1	11	37	12	15	20.7255	1	Dataset1
26375	女	0	0	0	1	3	0	0	0	1	2	2	20	1	19.5181	0	Dataset1
25812	女	0	0	0	1	3	0	0	0	0	3	26	16	5	18.9076	0	Dataset1
26996	女	0	0	0	1	3	0	0	0	0	7	12	19	3	19.3265	0	Dataset1
26155	女	0	1	1	2	3	0	1	0	6	9	17	20	3	20.4107	0	Dataset1
26441	女	0	0	0	2	3	0	1	0	0	2	25	19	15	20.6242	0	Dataset1
26114	女	0	0	1	2	3	0	0	0	2	9	18	17	8	18.4997	0	Dataset1
26167	女	0	0	1	1	3	0	0	0	0	4	13	19	10	20.1451	0	Dataset1
26174	女	0	0	1	2	4	0	0	0	1	1	13	19	7	19.7481	0	Dataset1
26031	女	0	0	0	1	3	0	0	0	0	0	14	18	0	20.0438	0	Dataset1
26180	女	0	0	0	1	3	0	1	1	0	2	14	20	9	19.3347	0	Dataset1
26041	女	0	0	1	1	3	0	1	0	1	3	4	20	15	19.4305	0	Dataset1
26108	女	0	0	0	1	2	0	0	0	0	2	7	12	3	19.0007	0	Dataset1
26978	女	0	0	0	1	3	0	0	0	0	4	4	18	5	19.1485	1	Dataset1
26465	女	0	0	0	2	2	0	0	0	3	4	13	23	0	18.0589	0	Dataset1
26673	女	0	0	0	1	3	0	0	0	0	1	10	19	0	19.1485	0	Dataset1
26352	女	0	0	0	2	3	0	1	0	0	2	43	22	2	19.1485	0	Dataset1
26550	女	0	0	1	2	3	0	1	0	1	9	58	16	20	20.5092	1	Dataset1
3970	女	0	0	1	2	1	0	1	0	1	12	54	8	14	23.2471	2	Dataset1
26436	女	0	0	0	1	3	0	0	0	0	2	3	20	0	18.1793	0	Dataset1
23666	女	0	0	1	3	3	0	1	1	1	10	63	14	15	21.5058	2	Dataset1
25851	女	0	0	1	2	2	0	0	0	0	8	68	11	9	19.1485	0	Dataset1
26083	女	0	0	0	1	3	0	0	0	1	2	4	22	0	19.8084	0	Dataset1
25469	女	0	0	0	1	3	0	0	0	1	2	42	17	0	19.5455	0	Dataset1
26776	女	0	0	0	1	4	0	0	0	0	1	2	21	0	18.5051	0	Dataset1
14709	女	1	0	1	1	2	0	1	1	5	9	24	11	18	22.0096	0	Dataset1
26445	女	0	0	1	1	3	2	0	0	1	5	11	19	7	19.3676	0	Dataset1
25676	女	0	0	1	3	3	2	0	0	1	6	23	18	24	20.397	1	Dataset1
24607	女	0	0	0	1	4	0	0	0	2	6	5	21	1	21.4538	0	Dataset1
25909	女	0	0	0	1	2	0	0	0	0	0	25	17	7	19.2471	0	Dataset1
6503	女	0	0	0	3	2	2	1	1	4	8	39	12	21	22.5024	1	Dataset1
4939	女	0	0	1	2	3	2	2	1	1	8	48	19	34	21.2649	1	Dataset1
15589	女	0	1	1	3	3	1	1	1	6	9	28	16	16	20.3012	2	Dataset1
25719	女	0	0	0	2	3	0	0	0	0	1	20	21	3	19.1485	0	Dataset1
26057	女	0	0	0	1	3	0	0	0	1	1	0	19	3	19.1485	0	Dataset1
26471	女	0	0	1	1	2	0	0	0	1	6	13	13	6	18.7324	0	Dataset1
26721	女	0	0	0	2	1	0	0	0	0	3	16	22	8	19.1485	0	Dataset1
26212	女	0	0	0	1	2	0	0	0	0	2	27	18	0	19.1485	0	Dataset1
26658	女	0	0	0	1	3	0	0	0	1	0	2	20	2	19.2307	0	Dataset1
25519	女	0	0	0	1	3	0	0	0	0	3	8	20	3	19.6441	0	Dataset1
26462	女	0	0	0	2	3	0	1	0	0	1	39	22	4	18.8008	0	Dataset1
26450	女	0	0	1	1	3	0	0	0	1	5	28	21	5	20.8433	0	Dataset1
26418	女	0	0	0	1	3	0	1	0	1	5	23	17	5	18.5079	0	Dataset1
10883	女	0	0	1	2	4	2	1	0	1	10	45	20	14	21.3306	1	Dataset1
15259	女	0	0	1	2	3	1	1	1	0	8	38	15	23	20.3012	0	Dataset1
26703	女	0	0	0	1	2	0	0	0	0	4	18	15	4	19.1485	0	Dataset1
26373	女	0	0	1	1	3	0	0	0	1	4	43	22	4	18.9021	0	Dataset1
26469	女	0	0	0	1	3	1	0	0	0	0	0	19	1	19.4031	0	Dataset1
27173	女	0	0	0	1	3	0	0	0	0	0	3	21	0	19.1485	0	Dataset1
26638	女	0	0	1	1	3	0	1	0	0	7	23	18	7	17.9904	0	Dataset1
6760	女	0	0	1	3	2	1	1	0	0	7	58	12	17	20.7201	1	Dataset1
27167	女	0	0	1	2	3	0	1	0	1	10	35	18	10	18.5927	2	Dataset1
10245	女	0	0	1	2	3	2	1	0	0	11	22	17	20	20.5914	1	Dataset1
10866	女	0	0	0	1	2	1	0	0	0	7	26	11	15	20.95	0	Dataset1
26707	女	0	0	0	1	3	0	0	0	0	2	14	20	6	18.5599	0	Dataset1
6965	女	0	0	1	3	2	2	0	0	1	9	56	12	16	21.3443	0	Dataset1
15252	女	0	0	1	2	4	0	1	1	1	10	46	18	25	20.5366	1	Dataset1
26369	女	0	0	1	2	2	0	0	0	2	7	26	12	10	19.1485	0	Dataset1
26742	女	0	0	1	3	1	2	1	1	0	12	39	5	16	19.1485	1	Dataset1
26421	女	0	0	1	1	2	0	0	0	0	8	13	12	11	18.3244	0	Dataset1
27151	女	0	0	0	1	3	0	0	1	1	4	27	17	6	18.0452	1	Dataset1
26922	女	0	0	0	1	3	0	0	0	0	0	3	22	0	19.5565	0	Dataset1
26984	女	0	0	1	2	2	2	1	0	0	8	35	12	11	20.4107	0	Dataset1
27158	女	0	0	0	1	2	0	0	0	0	1	31	16	6	19.1485	0	Dataset1
26609	女	1	1	1	1	2	1	1	0	7	12	13	17	13	19.1567	3	Dataset1
27101	女	0	0	0	1	2	2	1	0	0	4	5	15	14	19.3292	0	Dataset1
27099	女	0	0	0	1	3	0	0	0	0	5	7	19	1	19.1485	0	Dataset1
5445	女	0	0	1	2	3	3	2	2	1	12	45	15	44	22.0808	0	Dataset1
15154	女	1	0	1	2	1	2	2	1	2	11	28	6	24	20.3285	4	Dataset1
27084	女	0	0	0	1	2	0	0	0	0	0	3	17	0	19.4223	0	Dataset1
5462	女	0	0	1	2	3	2	1	0	1	7	36	16	15	21.2649	1	Dataset1
26862	女	0	0	0	2	2	0	0	0	0	2	19	20	7	19.3402	0	Dataset1
26744	女	0	0	0	1	3	0	0	0	0	0	3	21	0	19.1485	0	Dataset1
26900	女	0	0	0	1	3	0	0	0	0	2	7	17	0	18.5791	0	Dataset1
26604	女	0	0	0	1	3	0	0	0	0	1	0	18	0	18.4504	0	Dataset1
27397	女	0	0	0	1	2	0	0	0	0	6	6	17	1	19.1485	0	Dataset1
27070	女	0	0	0	1	3	0	0	0	0	6	12	15	8	20.6735	0	Dataset1
26087	女	0	0	1	1	2	0	0	1	0	9	5	12	11	19.1485	2	Dataset1
15135	女	0	0	1	2	2	1	3	1	0	11	40	16	26	20.5613	2	Dataset1
27197	女	0	0	1	1	3	0	0	0	4	5	12	14	3	18.4832	2	Dataset1
15014	女	0	1	1	2	4	2	1	0	6	3	34	19	21	20.3012	1	Dataset1
27198	女	0	0	1	3	3	0	0	0	0	6	19	18	3	19.1485	0	Dataset1
26853	女	0	0	0	1	3	0	0	0	0	3	10	16	5	20.4107	0	Dataset1
26919	女	0	0	1	1	3	0	0	0	0	3	40	18	0	18.6667	0	Dataset1
15361	女	0	0	1	3	3	2	1	1	1	5	36	17	28	19.8604	2	Dataset1
26888	女	0	0	1	1	3	0	0	0	1	2	25	18	7	19.1485	0	Dataset1
26740	女	0	0	1	2	3	0	0	0	1	8	42	19	6	19.3593	1	Dataset1
26957	女	0	0	1	2	3	2	1	0	0	5	27	16	13	19.0992	1	Dataset1
26809	女	0	0	1	1	3	0	1	0	0	6	19	17	9	20.3149	0	Dataset1
26492	女	0	0	1	1	3	0	0	0	0	6	36	16	15	19.1485	0	Dataset1
27177	女	0	0	1	2	4	0	0	0	0	4	10	21	0	18.3053	0	Dataset1
27120	女	0	0	0	2	3	0	1	0	0	4	40	15	14	19.1485	1	Dataset1
26487	女	0	0	0	1	3	0	0	0	0	2	7	26	8	19.1485	0	Dataset1
10857	女	0	0	1	2	4	2	1	0	1	10	38	19	24	20.9665	1	Dataset1
27106	女	0	0	1	2	3	0	0	0	0	3	42	21	0	19.0582	0	Dataset1
25462	女	0	0	0	1	3	0	0	0	1	0	8	20	0	21.7659	0	Dataset1
26251	女	0	0	1	1	4	0	0	0	2	9	14	22	5	19.3895	0	Dataset1
23335	女	0	0	1	2	3	0	0	0	0	4	14	15	6	18.2012	0	Dataset1
15764	女	0	0	0	2	3	2	1	0	0	5	21	16	13	19.5592	1	Dataset1
25825	女	0	0	0	1	3	0	0	0	1	1	12	22	0	19.1485	0	Dataset1
26794	女	0	0	0	1	3	0	0	0	0	2	13	22	8	19.2526	0	Dataset1
26473	女	0	0	1	1	3	0	0	0	2	4	24	15	7	19.2553	1	Dataset1
26218	女	0	0	0	1	3	0	0	0	0	0	5	23	0	18.3682	0	Dataset1
5665	女	0	0	1	2	2	0	1	0	0	12	24	18	22	22.1164	0	Dataset1
23914	女	0	0	1	2	3	0	0	0	0	6	12	18	4	20.0027	0	Dataset1
26610	女	0	1	1	2	3	0	1	1	6	11	43	17	14	19.1485	1	Dataset1
26468	女	0	0	0	1	3	0	0	0	0	0	1	21	3	19.3457	0	Dataset1
26552	女	0	0	0	1	3	0	0	0	0	1	5	20	2	19.1841	0	Dataset1
26689	女	0	0	0	1	3	0	0	0	0	2	3	19	1	19.5154	0	Dataset1
26937	女	0	1	1	2	1	1	1	1	7	11	35	10	19	18.8063	2	Dataset1
26088	女	0	0	0	2	2	0	0	0	0	0	28	20	1	19.1485	0	Dataset1
26883	女	0	0	0	2	3	0	1	0	2	3	12	15	11	18.4695	0	Dataset1
26576	女	0	0	1	1	3	0	0	0	0	3	5	16	0	18.1629	0	Dataset1
26761	女	0	0	1	1	3	0	0	0	2	2	23	16	0	20.1205	0	Dataset1
26044	女	0	0	0	1	3	0	0	0	1	2	29	17	3	18.2752	0	Dataset1
26938	女	0	0	1	2	2	0	0	0	0	3	16	15	3	18.2505	0	Dataset1
26300	女	0	0	1	2	3	0	0	0	0	5	26	19	1	19.1485	2	Dataset1
23428	女	0	0	0	1	3	0	0	0	0	4	11	16	4	19.3374	0	Dataset1
26542	女	0	0	0	2	3	0	0	0	0	3	22	19	8	19.1485	0	Dataset1
27061	女	0	0	0	1	2	0	0	0	0	3	15	11	8	19.1485	0	Dataset1
27396	女	0	0	1	1	2	0	0	0	0	5	11	15	14	20.178	0	Dataset1
14991	女	0	0	0	2	3	0	0	0	0	3	9	15	3	20.0055	2	Dataset1
27188	女	0	0	0	1	4	0	0	0	0	0	1	25	0	19.1485	0	Dataset1
4457	女	0	0	0	1	2	0	0	0	0	1	0	10	1	21.2649	0	Dataset1
26718	男	0	0	0	3	1	0	0	0	2	1	3	6	1	21.0979	0	Dataset1
27362	男	0	0	1	1	2	0	0	0	0	9	17	15	5	18.8747	0	Dataset1
26346	男	0	0	0	1	3	0	0	0	0	2	17	20	1	19.0089	0	Dataset1
26581	男	0	0	0	2	3	1	1	0	0	5	18	15	12	19.1786	1	Dataset1
27091	男	0	0	1	1	3	2	1	0	0	5	21	18	12	19.4552	0	Dataset1
27159	男	0	0	0	1	3	0	0	0	0	4	23	17	3	19.1485	0	Dataset1
27080	男	0	0	1	2	3	0	1	0	0	6	37	23	8	19.1485	0	Dataset1
26798	女	0	0	1	2	3	0	0	0	0	11	5	15	10	19.1485	1	Dataset1
26737	女	0	0	0	1	4	0	0	0	0	1	0	22	0	18.3901	0	Dataset1
27154	女	0	0	1	1	3	0	0	0	0	5	11	20	1	20.282	0	Dataset1
27034	女	0	0	0	1	2	0	0	0	0	3	12	11	1	19.1485	0	Dataset1
27349	女	0	0	1	3	2	0	2	0	1	11	23	12	16	18.8364	1	Dataset1
27067	女	0	0	0	2	4	0	0	0	0	1	13	24	0	18.3326	0	Dataset1
27331	女	0	0	0	1	3	0	0	0	1	1	4	21	2	19.2772	0	Dataset1
26720	女	0	0	0	1	4	0	0	0	0	1	0	23	0	19.2444	0	Dataset1
26944	女	0	0	0	2	4	0	0	0	0	2	35	22	3	19.2799	0	Dataset1
26664	女	0	0	0	1	3	0	0	0	0	3	13	17	0	20.0274	0	Dataset1
26256	女	0	0	0	1	3	0	0	0	0	1	2	17	2	18.2724	0	Dataset1
26417	女	0	0	0	1	3	0	0	0	0	0	1	20	0	19.8713	0	Dataset1
27361	女	0	0	1	2	2	0	0	0	0	2	8	13	1	19.1485	1	Dataset1
26716	女	0	0	0	1	3	0	0	0	0	3	19	17	9	18.4586	0	Dataset1
26245	女	0	0	0	2	3	0	0	0	0	4	32	19	1	19.1567	0	Dataset1
27127	女	0	0	0	1	3	0	1	0	0	1	1	21	3	18.9897	0	Dataset1
26857	女	0	0	1	2	2	0	0	0	0	7	18	19	12	18.6174	0	Dataset1
27352	女	0	0	1	2	4	1	2	0	0	9	12	16	27	18.9651	0	Dataset1
26665	女	0	0	1	2	3	0	0	0	0	10	13	16	8	19.1485	0	Dataset1
27089	女	0	0	0	1	3	0	0	0	1	3	12	21	2	18.2396	0	Dataset1
26634	女	0	0	0	1	4	0	0	0	0	3	13	22	4	19.3511	0	Dataset1
26783	男	0	0	1	1	3	0	0	0	1	11	4	16	9	18.527	0	Dataset1
27138	男	0	0	0	1	3	0	0	0	0	4	5	18	3	18.2943	0	Dataset1
26772	男	0	0	0	1	2	0	0	0	0	3	1	13	4	19.1485	0	Dataset1
7528	男	0	0	1	3	2	2	2	1	1	10	44	15	23	20.5804	0	Dataset1
26704	男	0	0	0	2	2	0	1	0	0	4	9	12	16	18.7132	0	Dataset1
20885	女	1	0	1	3	3	2	1	1	1	12	40	17	23	19.9452	2	Dataset1
8117	女	0	0	1	3	3	2	1	0	0	11	54	15	15	21.5031	1	Dataset1
21199	女	0	0	1	5	1	3	2	1	0	8	27	7	23	20.0329	2	Dataset1
4425	女	0	0	1	2	4	2	0	0	0	11	13	20	28	21.2238	1	Dataset1
21190	男	0	0	1	2	2	2	1	1	1	12	17	13	26	19.2444	1	Dataset1
20825	女	0	0	1	2	3	3	1	1	0	12	40	20	20	18.9487	2	Dataset1
4921	女	0	0	1	3	3	2	1	1	1	12	30	13	25	22.3792	2	Dataset1
4907	女	0	0	1	2	3	0	0	0	0	12	22	16	17	21.4921	0	Dataset1
4909	女	0	0	1	3	3	0	1	1	0	10	39	15	14	22.1355	1	Dataset1
20838	女	0	0	1	2	2	2	0	0	0	11	38	12	17	19.9316	0	Dataset1
21189	女	1	1	1	3	1	3	2	2	9	12	44	4	45	19.9425	4	Dataset1
20882	女	0	1	1	2	3	0	0	1	8	6	14	14	17	19.9836	2	Dataset1
20819	女	0	1	1	2	4	0	1	1	7	12	26	16	18	20.3943	1	Dataset1
20873	男	0	0	1	3	3	0	0	0	0	11	48	15	15	20.052	1	Dataset1
20807	女	0	0	1	3	3	0	1	0	1	12	46	20	14	19.3703	0	Dataset1
4914	女	0	0	1	3	2	2	1	0	0	11	46	12	15	21.3662	0	Dataset1
20861	女	0	0	1	1	4	0	1	0	1	11	21	16	20	20.9336	1	Dataset1
20827	女	1	0	1	2	2	0	1	1	2	11	25	9	25	20.0164	2	Dataset1
3707	女	0	0	1	2	2	0	1	0	1	8	30	11	17	22.2012	0	Dataset1
20839	女	0	0	1	1	2	2	1	0	0	11	26	18	15	19.718	0	Dataset1
20820	女	0	0	1	1	3	0	1	1	0	11	14	17	24	19.9699	1	Dataset1
3358	女	0	0	1	2	3	1	1	1	0	11	32	11	33	21.5578	1	Dataset1
20803	女	0	0	1	3	4	0	1	1	0	9	40	25	18	18.8282	1	Dataset1
20851	女	0	1	1	3	2	0	0	0	8	5	20	10	6	18.9706	0	Dataset1
4406	女	0	0	1	2	2	0	1	0	1	11	22	18	16	21.6454	0	Dataset1
3997	女	0	1	1	2	3	2	1	1	7	4	21	17	11	21.4894	2	Dataset1
20815	男	0	0	1	2	2	2	0	1	1	9	46	13	29	19.5756	2	Dataset1
24356	女	0	0	0	1	3	2	0	0	0	5	7	14	10	19.2745	0	Dataset1
23752	女	0	0	1	2	2	1	2	0	0	5	49	4	30	19.3018	1	Dataset1
16403	女	0	1	1	4	3	2	1	2	8	12	64	16	31	20.5613	3	Dataset1
25831	女	0	0	0	2	3	0	0	0	0	1	20	19	8	19.8631	0	Dataset1
23772	女	0	0	0	1	3	0	0	0	1	2	25	17	3	22.256	0	Dataset1
23876	女	0	0	0	1	3	0	0	0	0	1	14	23	0	18.9952	0	Dataset1
22403	女	0	0	0	1	3	0	0	0	0	2	6	24	0	18.6749	0	Dataset1
23870	女	0	0	0	1	4	0	1	1	0	4	13	22	14	18.601	0	Dataset1
23871	女	0	0	0	1	3	0	0	1	0	6	2	20	8	19.1513	1	Dataset1
24364	女	0	0	1	4	1	0	1	1	0	12	23	8	26	19.2799	0	Dataset1
23634	女	0	0	1	1	3	0	0	0	2	7	26	20	10	19.154	0	Dataset1
24066	女	0	0	0	2	3	0	0	0	0	6	20	15	3	19.05	0	Dataset1
23782	女	0	0	0	1	3	0	0	0	0	4	10	18	4	20.4079	0	Dataset1
23761	女	0	0	0	1	2	0	1	0	0	2	11	14	18	19.0226	0	Dataset1
23768	女	0	0	0	2	3	0	0	0	0	4	30	17	4	18.1547	0	Dataset1
24385	女	0	0	1	2	3	0	1	0	1	4	8	20	8	18.7762	0	Dataset1
23755	女	0	0	0	1	3	0	0	0	3	1	15	21	2	19.154	0	Dataset1
24352	女	0	0	0	1	3	0	0	0	3	2	8	18	4	19.3621	0	Dataset1
23763	女	0	0	0	1	4	0	1	0	0	2	5	20	3	18.0178	0	Dataset1
24144	女	0	0	0	2	2	0	0	0	0	3	20	13	4	19.6359	0	Dataset1
23948	女	0	0	0	2	3	0	1	0	1	3	34	17	11	19.154	0	Dataset1
23734	女	0	0	1	2	2	2	0	0	1	5	20	14	12	19.937	0	Dataset1
24383	女	0	0	0	1	3	0	1	0	0	2	31	19	10	19.1513	0	Dataset1
23776	男	0	0	0	1	3	0	0	0	0	1	13	24	4	19.1129	0	Dataset1
3935	男	0	0	0	2	1	1	0	1	2	4	21	11	21	23.206	0	Dataset1
24397	男	0	0	0	1	3	0	0	0	0	3	3	21	2	18.6064	1	Dataset1
23750	男	0	0	0	1	3	0	0	0	0	0	1	24	3	18.7953	0	Dataset1
28713	男	1	0	0	2	3	2	1	0	1	7	20	16	18	19.1485	2	Dataset1
23924	男	0	0	0	2	3	0	0	0	0	3	5	21	3	20.2136	0	Dataset1
23775	男	0	0	1	2	3	0	0	0	0	5	14	18	12	19.666	0	Dataset1
24388	男	0	0	1	4	2	3	1	1	3	10	55	13	37	19.8084	2	Dataset1
22404	男	0	0	0	1	3	0	0	0	0	0	3	22	0	19.5291	0	Dataset1
25352	女	0	0	0	2	2	2	1	1	0	5	42	20	12	20.3504	0	Dataset1
6400	女	0	0	0	1	2	0	1	0	1	5	36	14	16	21.2266	0	Dataset1
27862	女	0	0	0	2	3	3	0	0	1	2	29	17	15	19.6961	2	Dataset1
23879	女	0	0	1	1	3	0	0	0	0	8	14	21	8	19.1513	0	Dataset1
27880	女	0	0	0	2	3	0	0	0	1	0	12	22	9	19.154	0	Dataset1
19197	女	0	1	1	1	2	0	1	1	8	8	18	12	7	23.2252	2	Dataset1
27912	女	0	0	0	2	3	0	0	0	0	0	2	15	0	19.9425	0	Dataset1
23112	女	0	0	1	1	3	0	0	0	0	4	18	16	0	20.8241	0	Dataset1
23893	女	0	0	0	1	3	0	0	0	0	1	12	18	10	19.8877	1	Dataset1
23249	女	0	0	0	1	3	0	0	0	0	1	12	19	1	19.154	0	Dataset1
28147	女	0	0	0	1	4	0	0	0	1	5	25	20	0	19.2334	0	Dataset1
27861	女	0	0	0	2	3	0	0	0	0	2	13	21	4	19.1485	0	Dataset1
26134	女	0	0	1	1	3	0	0	0	0	6	16	10	14	17.7522	0	Dataset1
28477	女	0	0	0	1	2	0	0	0	0	0	9	11	10	19.1485	0	Dataset1
28463	女	0	0	0	2	3	0	0	0	0	0	49	17	10	18.2204	0	Dataset1
3519	女	0	0	1	2	3	2	1	1	0	12	35	18	17	20.564	2	Dataset1
24675	女	0	0	0	1	2	0	0	0	1	0	15	19	7	19.1513	0	Dataset1
27639	女	0	0	0	1	2	2	1	0	0	10	18	10	19	18.8939	0	Dataset1
27961	女	0	0	0	1	3	0	0	0	0	0	22	17	7	20.1643	0	Dataset1
27621	女	0	0	0	1	3	2	0	0	0	0	3	20	8	20.8077	1	Dataset1
27860	女	0	0	0	1	2	0	0	0	4	2	22	13	6	19.039	0	Dataset1
26580	女	0	0	0	1	3	0	0	1	0	4	12	21	7	19.3895	1	Dataset1
23891	女	0	0	0	1	3	0	0	0	1	3	19	19	2	20.0219	0	Dataset1
23106	女	0	0	0	1	3	0	0	0	1	1	9	22	0	19.154	0	Dataset1
23859	女	0	0	0	1	3	0	0	0	0	1	18	16	0	19.1513	0	Dataset1
27850	女	0	0	0	1	3	0	0	0	0	1	30	20	4	19.4086	0	Dataset1
23804	女	0	0	0	3	3	0	0	0	1	5	35	16	6	19.1513	0	Dataset1
23507	女	0	0	1	2	2	2	1	1	0	8	38	14	14	19.4552	1	Dataset1
27820	女	0	0	0	1	4	0	0	0	0	1	5	19	8	19.2553	0	Dataset1
19099	女	0	0	1	1	3	0	0	1	0	6	43	20	18	20.2875	0	Dataset1
3864	女	0	0	0	2	2	0	1	0	1	11	17	10	25	21.2649	0	Dataset1
26139	女	0	0	0	2	2	0	0	1	1	6	37	17	13	17.9493	1	Dataset1
23713	男	0	0	0	1	3	0	0	0	0	0	0	17	1	18.423	0	Dataset1
18904	男	0	0	1	1	3	0	1	0	0	12	29	15	15	19.4223	0	Dataset1
23949	男	0	0	1	1	4	0	0	0	1	9	14	16	10	18.0424	2	Dataset1
23138	男	0	0	1	2	3	0	0	0	1	7	35	13	7	20.4381	0	Dataset1
28502	男	0	0	1	2	3	2	1	0	0	3	53	15	11	21.306	0	Dataset1
25528	男	0	0	0	1	2	0	0	0	0	2	4	14	3	18.7981	0	Dataset1
23779	男	0	0	0	1	2	0	0	0	0	6	27	10	13	19.3949	1	Dataset1
27891	男	0	0	0	1	3	0	1	1	0	0	6	22	6	19.7481	1	Dataset1
23901	男	0	0	0	3	2	2	0	0	1	2	40	14	27	19.1513	1	Dataset1
24204	女	0	0	0	1	4	0	0	0	0	3	4	22	0	19.1513	0	Dataset1
24353	女	0	0	0	1	2	0	0	0	0	2	22	14	10	18.6311	0	Dataset1
24308	女	0	0	0	1	3	0	0	0	1	0	12	20	5	19.5428	0	Dataset1
24134	女	0	0	0	1	3	0	0	0	1	1	24	24	0	20.4627	0	Dataset1
24130	女	0	0	1	3	2	2	1	1	3	12	50	9	33	18.4175	3	Dataset1
16447	女	0	1	0	2	3	2	1	0	8	8	25	16	21	21.7303	1	Dataset1
24344	女	0	0	1	1	4	0	0	0	0	6	10	22	0	19.7947	2	Dataset1
16481	女	0	0	1	3	3	2	1	1	2	12	54	14	23	20.8104	2	Dataset1
24294	女	0	0	0	1	2	0	0	0	1	4	25	18	10	18.3819	1	Dataset1
23635	男	0	0	0	2	3	0	0	0	1	1	31	19	0	19.8439	0	Dataset1
24276	男	0	1	0	1	2	0	0	0	7	9	19	14	10	19.8467	0	Dataset1
16010	男	0	0	1	3	3	1	1	2	0	12	48	16	29	20.7584	2	Dataset1
15951	男	0	0	1	2	2	2	1	0	2	10	43	13	22	22.8145	1	Dataset1
24307	男	0	0	1	1	2	0	1	1	0	12	29	13	24	18.7296	1	Dataset1
28254	男	0	0	0	1	1	0	0	0	2	1	14	13	3	19.3566	0	Dataset1
16563	男	0	0	1	1	1	0	1	1	2	12	52	9	30	19.5483	2	Dataset1
23921	女	0	0	0	1	2	0	0	0	0	2	23	17	7	19.2991	0	Dataset1
27292	女	0	0	0	1	3	0	0	0	0	0	15	23	4	19.5373	0	Dataset1
27648	女	0	0	0	1	3	0	0	0	0	0	1	20	1	19.2909	0	Dataset1
24337	女	0	0	0	1	3	0	0	0	0	3	19	18	2	18.872	1	Dataset1
27933	女	0	0	0	1	3	0	0	0	0	0	4	22	0	19.1485	0	Dataset1
24219	女	0	0	0	2	3	0	0	0	0	0	18	21	0	18.8282	0	Dataset1
27951	女	0	0	0	2	3	2	1	0	0	8	23	21	17	18.768	0	Dataset1
24289	女	0	0	1	1	3	2	0	0	2	6	20	18	6	18.7242	1	Dataset1
4548	女	0	0	1	3	3	2	2	1	0	11	47	14	26	20.7693	3	Dataset1
27484	女	0	0	0	1	3	0	0	0	0	2	4	22	2	19.3922	0	Dataset1
23715	女	0	0	1	2	3	0	1	0	0	10	14	18	16	18.3025	2	Dataset1
16268	女	0	0	1	2	1	0	1	1	0	10	43	18	25	19.1431	2	Dataset1
23806	女	0	0	0	2	3	0	0	0	0	4	19	16	0	19.8576	0	Dataset1
23724	女	0	0	1	4	2	2	2	1	0	11	23	14	22	19.7892	2	Dataset1
24372	女	0	0	0	1	3	0	0	0	1	1	11	19	0	19.0007	0	Dataset1
27670	女	0	0	1	2	3	0	0	0	1	9	25	25	9	19.9781	0	Dataset1
24340	女	0	0	0	1	3	0	0	1	2	4	30	16	12	19.1978	0	Dataset1
23094	女	0	0	1	2	3	3	2	0	0	6	39	17	16	19.154	0	Dataset1
27246	女	0	0	0	1	2	0	0	0	0	1	13	20	2	19.0664	0	Dataset1
19180	女	0	1	0	3	2	2	1	1	10	5	52	15	17	20.2875	1	Dataset1
27572	女	0	0	0	1	2	0	0	0	1	1	15	21	10	21.1143	0	Dataset1
24580	女	0	0	0	1	4	0	0	0	0	2	0	17	3	18.2971	0	Dataset1
23017	女	0	0	0	1	3	0	0	0	0	4	12	20	10	19.4141	0	Dataset1
27641	女	0	0	1	1	3	0	1	0	0	3	15	19	10	19.2033	1	Dataset1
27926	女	0	0	1	1	3	0	0	0	0	5	3	17	4	19.0171	0	Dataset1
28466	女	0	0	0	1	3	0	0	0	1	0	1	24	5	18.4914	0	Dataset1
27692	女	0	0	1	1	3	0	0	0	0	9	2	19	7	18.3737	0	Dataset1
27943	男	0	0	0	2	4	0	0	0	2	7	3	18	3	19.8932	0	Dataset1
23095	男	0	0	1	1	3	0	0	0	1	3	19	16	6	19.154	0	Dataset1
18567	男	0	0	1	1	3	0	0	0	2	11	30	12	18	21.7878	0	Dataset1
27623	男	0	0	0	2	2	2	0	0	0	8	24	18	14	19.1485	1	Dataset1
28497	男	0	0	0	1	3	1	0	0	0	5	7	14	7	19.1485	0	Dataset1
25578	男	0	0	1	1	4	0	0	0	1	9	33	21	13	19.3949	2	Dataset1
23712	男	0	0	0	2	4	0	0	0	0	1	36	27	1	19.447	0	Dataset1
26192	男	0	0	0	1	3	0	0	0	0	5	36	23	5	20.2793	0	Dataset1
19143	女	0	0	1	3	4	0	1	1	0	9	66	19	20	21.3498	1	Dataset1
25828	女	0	0	0	3	2	2	1	1	1	6	33	15	16	19.4689	1	Dataset1
23413	女	0	0	0	2	2	1	1	1	0	0	35	13	22	19.154	0	Dataset1
27657	女	0	0	0	1	3	0	0	0	0	0	3	20	0	19.1485	0	Dataset1
27658	女	0	0	0	2	3	0	1	0	0	5	18	16	4	20.3833	1	Dataset1
28079	女	0	0	0	2	3	0	0	0	0	1	15	17	0	19.3977	0	Dataset1
23540	女	0	0	1	2	3	2	1	0	0	6	20	23	17	20.5613	1	Dataset1
23747	女	0	1	1	3	2	0	1	1	6	6	53	13	15	19.154	0	Dataset1
18404	女	0	1	1	3	3	0	1	1	7	7	18	20	8	20.167	2	Dataset1
18812	女	0	0	1	2	1	0	1	1	3	8	35	13	28	22.1711	1	Dataset1
27693	女	0	0	0	1	3	0	0	0	0	0	8	17	0	19.1485	0	Dataset1
18653	女	0	1	1	2	3	0	1	1	9	11	35	12	19	21.3662	1	Dataset1
27722	女	0	0	0	2	2	0	1	0	1	4	40	16	14	19.9726	1	Dataset1
5175	女	0	0	1	1	2	0	1	0	0	11	16	14	21	21.5551	0	Dataset1
27980	女	0	0	1	1	3	0	0	0	0	7	17	19	0	19.4168	1	Dataset1
23748	女	0	0	0	2	2	0	0	0	0	9	58	17	16	19.1869	0	Dataset1
27918	女	0	0	1	3	2	1	1	0	1	9	27	14	16	20.1369	1	Dataset1
27871	女	0	0	0	2	3	0	0	0	1	0	25	18	2	23.0746	0	Dataset1
23814	女	0	0	0	1	3	0	0	0	0	0	0	21	2	19.7728	0	Dataset1
27752	女	0	0	0	1	2	0	0	0	2	0	3	13	8	19.0308	0	Dataset1
23486	女	0	0	0	1	2	0	0	0	1	2	15	16	11	19.154	0	Dataset1
23534	女	1	0	0	1	3	0	0	0	1	2	3	15	4	19.1704	0	Dataset1
23800	女	0	0	1	1	4	0	0	0	0	2	34	17	8	19.154	1	Dataset1
27895	女	0	0	0	1	3	0	0	0	0	2	13	19	6	19.3867	1	Dataset1
23481	女	0	0	1	2	2	0	0	0	0	8	22	16	9	19.3867	0	Dataset1
23742	女	0	0	1	2	3	0	1	1	1	12	33	18	5	18.4559	1	Dataset1
23098	女	0	0	1	2	1	0	0	1	1	9	31	14	23	20.2519	2	Dataset1
28499	女	0	0	0	2	4	0	0	0	0	2	29	22	0	18.9979	0	Dataset1
25980	女	0	0	0	1	2	0	1	0	0	1	8	20	4	18.5024	1	Dataset1
18876	女	0	0	1	3	3	2	1	1	0	9	25	12	24	20.9172	1	Dataset1
27760	女	0	0	1	1	3	0	0	0	0	2	5	24	0	20.4463	0	Dataset1
23751	女	0	0	0	2	3	0	0	0	0	0	29	20	0	19.0938	0	Dataset1
18927	男	0	0	1	2	1	2	3	1	1	12	26	17	22	20.2875	3	Dataset1
23741	男	0	0	0	1	3	0	0	0	1	1	3	17	5	20.3641	0	Dataset1
23459	男	0	0	0	1	4	0	0	0	1	0	5	23	3	19.154	0	Dataset1
23613	男	0	0	0	2	2	0	0	0	1	0	41	25	0	19.154	0	Dataset1
22402	男	0	0	0	1	4	0	0	0	1	3	9	27	0	21.0513	0	Dataset1
23749	男	0	0	1	2	3	0	0	0	2	5	17	16	9	19.154	0	Dataset1
28277	男	0	0	0	2	3	0	0	0	0	2	37	19	8	17.7331	0	Dataset1
23754	男	0	0	0	3	3	0	1	0	0	5	24	18	16	19.3703	0	Dataset1
27917	男	0	0	1	2	1	1	1	0	2	4	16	11	5	19.4442	0	Dataset1
27761	男	0	0	0	2	3	0	0	0	0	3	30	20	7	19.0116	0	Dataset1
27581	男	0	0	1	1	2	0	0	1	0	10	43	16	15	18.694	1	Dataset1
27916	男	0	0	0	1	3	0	0	0	0	0	17	18	0	18.8172	0	Dataset1
23442	男	0	0	0	1	2	0	1	1	1	2	19	15	9	20.104	0	Dataset1
14810	女	0	0	1	1	3	1	0	1	1	12	26	14	17	20.1177	1	Dataset1
26635	女	0	0	0	1	3	0	0	0	0	7	25	21	9	18.9541	0	Dataset1
27728	女	0	0	0	2	4	0	0	0	0	3	36	23	4	19.1485	0	Dataset1
27972	女	0	0	0	1	2	0	0	0	2	4	18	22	1	19.0637	0	Dataset1
27999	女	0	0	0	1	3	0	0	0	0	2	1	19	1	19.1485	0	Dataset1
27687	女	0	0	0	2	3	0	0	0	0	2	30	19	7	19.6742	0	Dataset1
27701	女	0	0	0	1	3	0	0	0	1	5	24	19	5	19.0472	0	Dataset1
27982	女	0	0	0	2	3	2	1	0	0	5	8	13	12	18.7488	0	Dataset1
28295	女	0	0	0	1	3	0	0	0	0	1	2	18	6	18.642	0	Dataset1
27963	女	0	0	0	1	3	0	0	0	0	2	10	21	0	19.1485	0	Dataset1
28267	女	0	0	1	2	4	0	0	0	0	2	10	21	8	18.2149	0	Dataset1
28256	女	0	0	0	1	3	0	0	0	2	0	10	22	0	19.1485	0	Dataset1
27427	女	0	0	0	1	3	0	0	0	0	6	22	21	5	19.3046	0	Dataset1
27700	女	0	0	0	1	2	0	1	0	0	4	4	17	9	18.6119	0	Dataset1
27624	女	0	0	0	2	3	0	0	0	0	0	18	17	0	19.4415	0	Dataset1
27464	女	0	0	0	2	3	0	0	0	0	3	12	18	6	19.1485	0	Dataset1
5343	女	0	0	0	1	3	0	1	0	0	11	20	12	7	21.2649	0	Dataset1
28359	女	0	0	0	1	3	0	0	0	0	4	16	18	7	19.6824	1	Dataset1
27558	女	0	0	0	1	3	0	0	0	0	2	20	15	5	19.1485	0	Dataset1
27884	女	0	0	0	1	2	0	1	0	1	7	5	13	5	19.1485	1	Dataset1
27988	女	0	0	0	2	4	0	0	0	0	0	4	21	0	19.1622	0	Dataset1
28238	女	0	0	0	1	2	0	2	0	1	5	8	19	13	18.2177	0	Dataset1
27996	女	0	0	1	3	3	2	1	0	0	5	19	13	17	19.3566	1	Dataset1
26402	女	0	0	1	1	2	0	0	1	0	7	14	16	4	18.9076	0	Dataset1
19168	女	0	0	1	2	2	3	1	0	1	7	43	7	17	20.2464	1	Dataset1
27242	女	0	0	0	1	3	0	0	0	0	3	2	19	2	18.9295	1	Dataset1
28260	女	0	0	0	3	3	3	1	0	3	3	11	19	8	19.1129	0	Dataset1
27981	女	0	0	1	2	3	0	1	1	0	5	13	16	10	19.1485	1	Dataset1
27483	女	0	0	0	2	3	2	1	0	1	2	18	22	10	17.7851	0	Dataset1
27998	女	0	0	0	3	2	0	0	0	0	6	16	14	2	18.8939	0	Dataset1
27710	女	0	0	0	1	4	0	0	0	0	2	14	22	3	18.768	0	Dataset1
27416	女	0	0	1	1	2	0	0	0	0	7	26	17	5	19.1485	0	Dataset1
27552	女	0	0	1	2	3	0	0	0	0	8	37	17	16	19.1485	1	Dataset1
27628	男	0	0	0	1	2	0	1	1	0	5	10	10	17	19.8905	0	Dataset1
28661	男	0	0	0	1	3	0	0	0	0	1	22	22	0	19.0582	0	Dataset1
27541	男	0	0	1	2	2	2	1	1	0	5	44	17	23	18.4312	0	Dataset1
27706	男	0	0	1	1	2	0	0	0	0	5	6	14	1	19.1485	0	Dataset1
27723	男	0	0	0	1	3	0	0	0	0	1	16	16	7	19.2772	0	Dataset1
27633	男	0	0	0	2	3	0	1	0	0	4	29	16	6	19.1403	0	Dataset1
27645	男	0	0	1	1	2	2	1	0	2	12	18	13	15	19.1485	0	Dataset1
27575	男	0	0	0	1	3	0	0	0	1	1	10	18	1	19.8576	0	Dataset1
15826	男	1	0	1	3	1	1	1	1	2	10	32	9	24	21.0431	2	Dataset1
27627	男	0	0	0	1	3	0	0	0	0	3	7	15	11	19.1485	0	Dataset1
27987	男	0	0	1	3	2	2	1	1	1	12	62	9	16	20.3285	1	Dataset1
27481	男	0	0	1	1	3	0	0	0	0	2	4	15	0	18.423	0	Dataset1
27969	男	0	0	1	2	2	2	1	0	0	9	27	18	22	18.5298	0	Dataset1
24055	女	0	0	0	2	3	0	0	0	0	2	10	16	3	19.1513	0	Dataset1
24072	女	0	0	0	1	3	0	0	0	0	0	1	22	0	19.1513	0	Dataset1
27936	女	0	0	0	1	3	0	0	0	0	4	1	18	0	19.1485	0	Dataset1
28485	女	0	0	1	2	2	0	0	0	0	7	15	13	0	19.1978	0	Dataset1
28774	女	0	0	1	1	3	0	0	1	0	4	6	19	7	18.9158	0	Dataset1
24104	女	0	0	0	1	3	0	0	0	0	4	10	15	4	19.1513	1	Dataset1
28349	女	0	0	0	1	3	0	0	0	0	1	1	20	2	18.9185	0	Dataset1
24067	女	0	0	1	2	3	2	1	1	2	7	60	21	18	19.1513	1	Dataset1
24079	女	0	0	0	2	2	0	0	0	0	5	5	17	7	18.9268	0	Dataset1
24193	女	0	0	1	3	2	2	1	1	1	12	37	12	22	19.0198	3	Dataset1
24097	女	0	0	0	2	3	2	0	0	0	3	30	19	10	18.8227	0	Dataset1
27853	女	0	0	1	2	2	2	0	0	1	7	9	10	2	18.6311	0	Dataset1
24063	女	0	1	0	1	1	0	0	1	10	4	7	15	15	19.102	1	Dataset1
27899	女	0	0	0	1	2	0	0	0	0	1	8	18	0	19.1485	0	Dataset1
27620	女	0	0	1	1	3	0	0	0	0	4	4	19	6	18.9049	0	Dataset1
23010	女	0	0	0	1	3	0	0	0	1	4	18	17	8	19.2471	0	Dataset1
24108	女	0	0	1	2	2	0	1	0	0	7	8	13	11	20.0383	1	Dataset1
4055	女	0	0	1	1	2	2	1	1	1	11	15	9	20	21.0815	2	Dataset1
18957	女	0	0	0	1	3	0	0	0	0	3	11	17	3	19.7782	0	Dataset1
28459	女	0	0	0	1	4	0	0	0	0	2	3	20	2	19.1485	0	Dataset1
23120	女	0	0	0	2	4	0	0	0	1	9	31	20	3	20.5147	1	Dataset1
27857	女	0	0	0	1	3	0	0	0	1	3	12	16	0	18.5626	1	Dataset1
27733	女	0	0	0	2	3	0	0	0	0	0	37	19	2	19.0554	0	Dataset1
4370	女	0	0	1	2	3	0	0	0	0	7	35	20	15	21.2649	0	Dataset1
27868	女	0	0	1	1	3	0	0	0	0	4	11	21	1	18.3655	0	Dataset1
27976	女	0	0	0	1	4	0	0	0	0	5	13	26	0	17.9713	0	Dataset1
27892	女	0	0	0	2	3	2	0	0	0	3	25	18	8	19.2635	0	Dataset1
23012	女	0	0	0	2	3	0	0	0	0	1	32	19	3	19.2005	1	Dataset1
19032	男	0	0	0	2	3	1	0	0	0	3	25	17	3	20.2437	0	Dataset1
23024	男	0	0	0	1	3	0	0	0	2	0	4	17	7	19.154	0	Dataset1
27864	男	0	0	0	1	3	0	0	0	0	2	11	23	3	18.9678	0	Dataset1
28478	男	0	0	0	1	3	0	0	0	0	0	0	14	0	18.5325	0	Dataset1
24656	男	0	0	0	1	3	0	0	0	1	0	25	17	6	21.3634	0	Dataset1
27875	男	1	0	1	5	2	0	2	2	2	12	37	13	18	19.269	4	Dataset1
23081	男	0	0	0	1	1	0	0	0	1	6	1	10	10	19.4579	0	Dataset1
24069	男	0	0	1	1	3	0	0	0	0	6	37	20	3	20.1697	0	Dataset1
23904	男	0	0	0	2	3	0	0	0	1	4	23	19	7	18.601	0	Dataset1
28303	男	0	0	1	1	4	0	0	0	0	3	13	19	0	19.1485	0	Dataset1
28102	男	0	0	0	2	3	0	0	0	2	2	6	16	1	18.4339	0	Dataset1
27929	女	0	0	1	2	3	0	1	0	0	8	31	22	16	19.1485	0	Dataset1
27422	女	0	0	0	1	4	0	0	0	1	2	15	18	1	19.1485	0	Dataset1
28586	女	0	0	0	1	3	0	0	0	0	7	9	20	5	19.3758	0	Dataset1
27625	女	0	0	0	3	3	0	0	0	0	4	37	21	8	19.2608	0	Dataset1
27559	女	0	0	0	1	3	0	1	0	0	5	14	17	13	19.1431	0	Dataset1
24189	女	0	0	0	2	2	0	0	0	0	2	8	15	2	18.5462	0	Dataset1
28580	女	1	0	1	2	1	2	2	0	4	12	29	14	24	18.8474	2	Dataset1
27893	女	0	0	0	1	3	0	0	0	0	1	4	16	0	19.1485	0	Dataset1
27392	女	0	0	0	1	3	0	0	0	0	3	2	21	0	18.4066	0	Dataset1
27858	女	0	0	0	1	2	2	1	0	0	3	11	10	10	19.1485	0	Dataset1
25315	女	0	0	0	1	3	0	0	0	1	1	0	19	0	19.2909	0	Dataset1
18439	女	0	1	1	3	3	0	0	0	6	7	52	18	11	19.8905	0	Dataset1
27942	女	0	0	0	1	2	0	0	0	1	3	16	14	7	19.1485	0	Dataset1
26903	女	0	0	0	1	3	0	0	0	1	1	18	21	2	18.82	0	Dataset1
28236	女	0	0	0	2	3	2	1	0	1	5	17	18	8	19.1923	0	Dataset1
27321	女	0	0	0	1	3	0	0	0	1	0	9	23	0	18.976	0	Dataset1
27935	女	0	0	0	1	3	0	0	0	3	1	22	17	6	19.1485	0	Dataset1
27617	女	0	0	1	1	4	0	0	0	1	3	7	25	0	19.2991	0	Dataset1
4051	女	0	0	1	3	3	2	1	0	0	8	16	12	17	20.8186	1	Dataset1
23691	女	0	0	0	1	3	0	1	0	1	1	0	22	3	19.154	0	Dataset1
28561	女	0	0	0	1	3	0	0	0	0	1	14	18	8	21.0459	0	Dataset1
23688	女	0	0	0	2	3	0	0	0	1	3	40	24	16	19.154	0	Dataset1
27642	女	0	0	0	1	3	0	0	0	0	5	2	22	1	18.3956	0	Dataset1
27993	女	0	0	1	1	3	0	0	0	0	3	8	21	0	19.1485	0	Dataset1
24185	女	0	0	0	1	3	0	0	0	0	1	2	23	5	19.1513	0	Dataset1
23417	女	0	0	0	1	3	0	0	0	1	1	8	22	7	19.154	0	Dataset1
27859	女	0	0	1	1	3	0	0	0	0	2	7	21	1	19.1485	0	Dataset1
23264	女	0	0	0	1	3	0	0	0	1	1	4	22	1	19.332	0	Dataset1
27920	女	0	0	0	1	2	0	1	0	0	4	3	16	2	18.9678	0	Dataset1
23270	女	0	0	0	1	2	0	0	0	0	2	6	14	3	19.154	1	Dataset1
23597	男	0	0	1	1	3	2	1	0	0	10	8	15	11	18.3491	0	Dataset1
23217	男	0	0	0	1	3	0	0	0	0	0	15	24	0	19.154	0	Dataset1
26467	男	0	1	1	1	2	0	1	1	7	10	24	17	10	19.1485	2	Dataset1
27221	男	0	0	0	3	3	2	0	0	0	8	56	16	9	20.8131	0	Dataset1
28533	男	0	0	0	1	3	0	0	0	0	0	0	16	0	20.1369	0	Dataset1
28212	男	0	0	0	1	3	0	0	0	0	0	7	16	0	19.2033	0	Dataset1
28455	男	0	0	1	3	3	1	1	0	0	5	55	20	12	18.9268	0	Dataset1
23699	男	0	0	1	1	4	1	1	1	3	5	1	21	16	20.1561	2	Dataset1
27210	男	0	0	0	1	2	0	0	0	0	1	5	15	0	19.384	0	Dataset1
23711	男	0	0	0	1	3	0	0	0	0	0	4	23	0	18.9049	0	Dataset1
26289	男	0	0	0	2	3	1	1	0	0	1	21	16	10	19.1485	0	Dataset1
27769	女	0	0	1	2	3	0	0	0	0	4	31	19	4	18.2806	0	Dataset1
4418	女	0	1	1	2	2	2	1	1	6	10	16	15	21	21.1608	1	Dataset1
3705	女	0	1	0	1	3	3	0	0	6	6	20	18	15	20.6352	1	Dataset1
24233	女	0	0	0	1	2	0	0	0	0	5	21	14	2	19.0007	0	Dataset1
27748	女	0	0	1	1	4	2	0	0	0	6	21	23	19	18.8337	0	Dataset1
4421	女	0	0	0	2	2	0	0	0	0	2	7	16	6	21.306	0	Dataset1
24083	女	0	0	1	1	4	0	0	0	0	6	9	22	11	19.1431	0	Dataset1
27757	女	0	0	0	1	3	0	0	0	0	3	6	21	8	19.2471	0	Dataset1
23697	女	0	0	0	2	3	0	0	1	0	2	21	18	10	19.9151	0	Dataset1
27470	女	0	0	0	2	3	0	0	0	0	6	14	20	0	19.1485	0	Dataset1
18918	女	0	0	0	3	3	2	1	0	3	5	54	14	12	19.5948	1	Dataset1
23718	女	0	0	1	1	1	0	1	0	5	6	12	15	2	19.154	1	Dataset1
4436	女	0	0	1	3	3	2	1	0	0	8	37	15	15	20.6297	1	Dataset1
24251	女	1	0	1	2	3	2	0	1	1	7	19	15	17	19.1513	0	Dataset1
24231	女	0	0	0	1	4	0	0	0	0	0	0	25	0	19.1513	0	Dataset1
27780	女	0	0	1	2	4	0	1	0	0	4	21	19	14	18.2834	1	Dataset1
27423	女	0	0	1	1	3	0	0	0	2	10	16	15	6	19.6386	0	Dataset1
18613	女	0	0	1	2	3	2	1	0	0	6	37	20	14	20.2875	0	Dataset1
28776	女	0	0	0	1	3	0	0	0	0	3	3	20	4	19.3949	0	Dataset1
23716	女	0	0	0	1	3	0	0	0	0	1	5	22	3	18.423	0	Dataset1
25057	女	0	0	0	2	3	0	1	0	2	7	13	14	3	18.3628	0	Dataset1
24829	女	0	0	0	1	3	0	0	0	1	7	19	21	1	18.7132	0	Dataset1
28795	女	0	0	1	1	3	2	1	2	1	10	16	12	18	19.6003	0	Dataset1
23679	女	0	0	0	1	3	0	0	0	0	0	1	22	0	19.154	0	Dataset1
28310	女	0	0	0	1	3	0	0	0	0	1	4	17	1	19.1485	0	Dataset1
23903	女	0	0	0	1	3	0	0	0	0	3	9	17	0	19.2882	0	Dataset1
23431	女	0	0	0	1	3	0	0	0	0	0	1	18	0	19.154	0	Dataset1
27849	女	0	0	0	1	4	0	0	0	0	2	6	24	1	19.1485	1	Dataset1
3907	女	0	0	1	4	3	0	0	0	1	12	50	11	13	21.2841	0	Dataset1
27759	女	0	0	1	1	4	2	1	1	0	5	21	22	15	19.8056	0	Dataset1
27773	女	0	0	0	1	3	0	1	0	0	4	22	20	11	20.2546	0	Dataset1
25188	女	0	0	0	1	3	0	0	0	0	6	27	23	12	18.5298	0	Dataset1
28227	男	0	0	1	2	3	0	1	0	0	9	17	22	5	19.5236	0	Dataset1
25559	男	0	0	0	1	3	0	0	0	0	2	14	25	2	18.4148	0	Dataset1
27794	男	0	0	0	1	4	0	0	0	0	0	7	22	3	19.1485	0	Dataset1
25603	男	0	0	0	1	1	0	1	0	0	2	1	5	1	18.3217	0	Dataset1
23626	男	0	0	1	2	2	0	0	0	0	3	18	16	7	19.7481	0	Dataset1
27974	男	0	0	0	3	3	0	0	0	0	5	36	20	7	19.1485	0	Dataset1
26070	男	0	0	1	2	4	0	0	0	1	8	41	22	4	18.6146	0	Dataset1
15402	女	0	1	1	3	2	2	1	1	6	8	32	14	18	20.3012	2	Dataset1
15892	女	0	0	1	2	3	2	1	1	0	12	38	14	20	20.4928	1	Dataset1
15919	女	0	0	0	3	2	0	1	1	0	4	36	12	14	21.076	1	Dataset1
24894	女	0	0	0	1	1	0	0	0	2	2	8	12	0	21.4319	0	Dataset1
25032	女	0	0	1	1	3	0	0	0	1	5	4	21	2	19.1485	0	Dataset1
25131	女	0	0	0	2	3	0	1	1	0	2	24	21	7	20.8597	0	Dataset1
25106	女	0	0	0	1	4	0	0	0	0	1	8	21	4	19.1485	0	Dataset1
27851	女	1	0	0	2	3	0	0	0	1	4	11	14	7	19.2635	0	Dataset1
25173	女	0	0	0	1	3	0	0	1	0	1	3	16	8	19.3018	0	Dataset1
25121	女	0	0	0	1	4	0	0	0	0	2	7	20	3	19.1485	0	Dataset1
24895	女	0	0	0	2	3	0	1	1	0	5	34	19	6	19.1513	3	Dataset1
24740	女	0	0	1	2	3	0	0	0	2	4	24	17	14	18.5572	0	Dataset1
18922	女	0	0	1	2	3	2	2	0	1	11	51	16	25	17.1389	1	Dataset1
25132	女	0	0	0	1	2	0	1	0	0	8	35	10	15	20.9144	0	Dataset1
24752	女	0	0	0	2	3	0	1	1	0	4	11	14	12	20.9281	1	Dataset1
25199	女	0	0	0	1	3	0	0	0	0	4	19	24	0	19.1485	0	Dataset1
24909	女	0	0	0	1	3	0	0	0	1	0	27	19	2	18.59	0	Dataset1
25056	女	0	0	1	2	3	0	0	0	0	6	27	20	5	19.1485	0	Dataset1
25118	女	1	0	0	1	3	0	0	0	3	1	24	18	1	19.8658	0	Dataset1
25028	女	0	0	0	1	3	0	1	0	1	2	16	17	13	18.9952	0	Dataset1
25126	女	0	0	0	2	3	0	0	0	1	6	37	18	8	19.1759	0	Dataset1
25158	女	0	0	0	1	3	0	1	0	0	6	4	19	6	19.4333	0	Dataset1
24869	男	0	0	1	2	2	0	1	0	1	6	24	13	5	20.0137	0	Dataset1
25077	男	0	0	0	1	3	0	0	0	1	3	3	16	2	18.6119	0	Dataset1
24745	男	0	0	0	1	2	0	0	0	1	1	12	8	5	19.5619	0	Dataset1
25128	男	0	0	0	1	3	0	0	0	0	2	12	15	0	19.3457	0	Dataset1
23851	男	0	0	1	1	3	0	0	0	0	8	13	22	5	18.2669	0	Dataset1
24168	男	0	0	0	3	1	0	0	0	0	2	15	10	0	19.1513	0	Dataset1
24019	男	0	0	0	1	3	0	0	0	1	1	26	23	1	20.4189	0	Dataset1
25035	男	0	0	1	1	4	0	0	0	0	2	0	25	0	18.7433	0	Dataset1
24748	男	0	0	0	1	1	0	1	1	0	6	31	14	18	19.4059	1	Dataset1
23730	男	0	0	1	2	4	0	0	0	1	4	15	23	1	19.154	1	Dataset1
24417	女	0	0	0	2	2	0	1	0	0	4	15	17	12	19.1513	0	Dataset1
28454	女	0	0	0	2	3	0	0	0	0	0	14	21	1	18.5462	0	Dataset1
24407	女	0	0	0	2	2	0	0	0	0	1	3	10	1	20.0137	0	Dataset1
24787	女	0	0	1	1	3	0	0	1	0	4	9	16	9	19.0719	0	Dataset1
27836	女	0	0	0	1	2	0	1	0	1	1	20	16	8	18.9733	0	Dataset1
28507	女	0	0	1	1	3	0	1	0	1	12	34	17	16	19.2444	0	Dataset1
18258	女	0	0	1	2	1	2	2	1	3	5	16	12	23	20.2902	3	Dataset1
28559	女	0	0	0	1	3	0	0	0	0	3	34	22	2	18.5079	0	Dataset1
28763	女	0	0	0	2	2	0	0	0	0	0	14	16	0	19.7043	0	Dataset1
18639	女	0	0	1	2	2	2	1	0	0	3	49	12	14	21.8207	0	Dataset1
28043	女	0	0	1	2	2	2	1	0	0	6	17	8	11	19.1485	1	Dataset1
28467	女	0	0	0	1	3	0	0	0	0	3	7	20	14	18.9514	0	Dataset1
24410	女	0	0	0	1	3	0	0	0	1	5	12	15	12	20.6188	0	Dataset1
28783	女	0	0	0	1	3	0	0	0	0	3	5	21	2	18.5298	0	Dataset1
27927	女	0	0	1	1	3	0	1	0	1	6	11	22	7	18.9843	0	Dataset1
18657	女	0	0	1	2	2	2	1	1	0	11	26	14	20	20.9473	1	Dataset1
28284	女	0	0	0	1	3	0	0	0	0	1	19	17	7	19.1485	0	Dataset1
4158	女	0	0	1	2	2	1	0	0	2	10	18	12	16	21.5359	1	Dataset1
28782	女	0	0	0	1	3	0	0	0	0	2	31	17	4	19.1485	0	Dataset1
28549	男	0	0	1	1	3	0	0	0	0	9	37	23	6	19.1485	0	Dataset1
28164	男	0	0	1	2	2	2	0	1	1	8	33	13	18	19.1485	0	Dataset1
28247	男	1	0	0	2	2	0	0	0	1	3	55	15	9	19.1485	0	Dataset1
28750	男	0	0	0	2	1	0	0	0	0	0	7	10	4	19.1485	0	Dataset1
28450	男	0	0	1	2	1	0	1	0	1	4	20	10	18	18.3135	0	Dataset1
28288	男	0	0	0	2	3	2	0	0	0	2	34	18	10	19.1485	0	Dataset1
28304	男	0	0	1	1	2	0	1	0	0	7	25	11	15	20.6297	0	Dataset1
24716	女	0	0	1	2	3	0	0	0	0	9	13	15	1	18.3847	0	Dataset1
23458	女	0	0	0	2	3	0	0	0	0	10	25	16	5	19.2717	1	Dataset1
25692	女	0	0	1	1	3	0	0	1	0	7	5	16	5	17.9959	0	Dataset1
27809	女	0	0	1	2	3	0	0	0	0	5	23	18	4	19.0773	0	Dataset1
28441	女	0	0	1	2	2	0	0	0	1	9	4	10	0	19.3539	0	Dataset1
25852	女	0	0	1	3	2	1	1	0	0	9	22	19	22	19.1485	1	Dataset1
27968	女	0	0	0	1	3	0	0	0	0	4	14	17	1	19.1485	0	Dataset1
28793	女	0	0	0	1	3	0	0	0	0	6	8	19	1	19.1485	0	Dataset1
16445	女	0	0	0	4	2	0	1	1	0	4	18	10	18	20.3012	0	Dataset1
28072	女	0	0	0	1	3	0	0	0	1	0	4	19	2	20.1807	0	Dataset1
28026	女	0	0	0	1	3	0	0	0	0	4	19	21	2	18.7132	0	Dataset1
24732	女	0	0	0	2	2	0	0	0	0	2	9	16	3	19.1513	0	Dataset1
23845	女	0	0	0	1	3	0	0	0	2	0	4	19	0	19.1513	0	Dataset1
23435	女	0	0	0	1	3	0	0	0	0	2	16	23	5	19.5866	0	Dataset1
26851	女	0	0	1	1	2	0	1	0	1	8	16	15	4	19.3484	0	Dataset1
18424	女	0	0	0	1	2	2	1	0	0	5	1	12	18	20.2875	0	Dataset1
24267	女	0	0	0	1	3	0	0	0	0	1	23	22	9	18.5079	0	Dataset1
23498	女	0	1	1	1	3	1	1	1	7	10	6	16	15	19.154	2	Dataset1
28514	女	0	0	1	1	3	0	0	0	0	5	6	17	6	18.4257	0	Dataset1
28209	女	0	0	1	1	2	0	0	0	0	7	12	13	0	18.5325	0	Dataset1
28339	女	0	0	0	1	3	0	0	0	0	2	1	20	0	18.9678	0	Dataset1
28567	女	0	0	0	1	3	0	0	0	0	3	0	21	0	18.7515	1	Dataset1
27354	女	0	0	0	1	4	0	0	0	0	4	10	21	4	19.0007	0	Dataset1
25550	女	0	0	1	2	3	0	1	0	1	9	19	12	16	19.1485	1	Dataset1
23551	女	0	0	0	1	2	0	0	0	0	5	30	19	3	18.4093	0	Dataset1
23124	女	0	0	0	1	4	0	0	0	1	1	10	20	1	19.154	0	Dataset1
25027	女	0	0	0	1	1	2	0	0	0	4	5	13	5	18.5763	1	Dataset1
25050	女	0	0	0	1	3	0	0	0	0	5	21	19	1	19.1485	0	Dataset1
25136	女	0	0	1	1	3	0	0	0	0	5	10	16	13	19.1485	0	Dataset1
24423	男	0	0	0	2	4	0	0	0	2	3	24	25	1	19.1513	0	Dataset1
28531	男	0	0	0	1	3	0	0	0	3	3	13	20	2	19.885	0	Dataset1
28145	男	1	0	0	2	2	0	0	0	2	4	22	12	11	19.5619	0	Dataset1
24427	男	0	0	0	1	3	0	0	0	0	1	4	20	9	18.527	0	Dataset1
28156	男	0	0	0	1	3	0	0	0	0	2	18	21	14	19.1485	0	Dataset1
23391	男	0	0	0	1	1	0	0	0	0	3	10	19	0	18.6393	0	Dataset1
28237	男	0	0	1	1	2	0	0	1	0	4	25	15	9	18.976	0	Dataset1
23123	男	0	0	0	1	3	0	0	0	0	3	17	19	3	19.0746	0	Dataset1
27959	男	0	0	0	2	2	0	1	0	0	4	27	13	13	19.2252	1	Dataset1
25168	男	0	0	0	1	2	0	0	0	1	1	7	20	7	24.8679	0	Dataset1
24255	男	0	0	0	1	1	0	0	0	3	0	21	15	14	18.653	0	Dataset1
23510	男	0	0	1	2	2	0	0	0	0	2	27	17	2	18.9185	1	Dataset1
28775	女	0	0	0	2	2	0	0	0	0	1	18	15	2	18.9596	0	Dataset1
28190	女	0	0	0	1	3	0	0	0	0	3	22	20	9	19.4004	0	Dataset1
27640	女	0	0	0	1	3	0	0	0	0	6	14	21	3	20.3395	0	Dataset1
28167	女	0	1	1	2	3	0	0	1	6	5	40	17	8	18.3409	0	Dataset1
25871	男	0	0	0	1	2	0	0	0	0	1	2	16	5	19.1485	0	Dataset1
27636	女	0	0	0	1	2	0	0	0	0	1	15	17	4	19.1485	0	Dataset1
27634	女	0	0	0	2	3	0	0	0	0	0	11	17	8	19.9316	0	Dataset1
27915	女	0	0	1	2	3	0	0	0	0	11	22	16	13	19.2307	0	Dataset1
26126	女	0	0	0	1	3	0	0	0	0	0	1	20	0	19.885	0	Dataset1
16160	男	1	0	0	3	2	0	1	1	1	9	53	17	14	22.4367	1	Dataset1
23011	女	0	0	0	1	3	0	0	0	0	1	11	19	2	19.154	0	Dataset1
23809	女	0	0	1	1	3	0	0	0	0	9	33	16	13	19.1513	1	Dataset1
28329	男	0	0	0	1	1	0	0	0	4	6	10	9	17	19.3895	0	Dataset1
16071	男	0	0	1	3	3	0	1	1	1	12	42	16	17	20.219	2	Dataset1
23951	女	0	0	1	1	2	0	1	0	1	9	9	10	11	19.154	1	Dataset1
27490	男	0	0	0	3	4	0	0	0	0	0	54	23	0	19.1485	1	Dataset1
25664	男	0	0	1	1	2	0	1	0	1	8	40	15	9	20.1944	0	Dataset1
23015	女	0	0	0	2	3	0	0	0	0	4	33	19	4	18.2669	0	Dataset1
27992	男	0	0	1	2	3	0	0	0	2	4	33	17	0	19.0144	0	Dataset1
25880	女	0	0	0	2	3	0	0	0	0	0	12	17	1	19.1485	1	Dataset1
28333	男	0	0	0	1	3	0	0	0	0	2	13	18	2	18.5161	0	Dataset1
24057	男	0	0	0	2	2	0	1	0	0	3	28	18	24	19.1513	0	Dataset1
24033	女	0	0	0	1	2	0	0	0	2	1	0	19	1	18.141	0	Dataset1
24333	男	0	0	0	2	3	0	0	0	0	2	18	21	2	19.5702	0	Dataset1
23558	女	0	0	1	1	3	2	3	0	0	6	25	15	26	18.5462	0	Dataset1
23556	男	0	0	0	1	3	0	0	0	0	2	4	19	10	19.3402	0	Dataset1
23554	女	0	0	0	1	3	0	0	0	0	5	5	19	0	18.3053	0	Dataset1
24345	女	0	0	0	1	3	0	0	0	0	0	5	16	4	18.1985	0	Dataset1
23545	男	0	0	0	1	2	0	0	0	0	0	14	18	6	20.9884	0	Dataset1
23920	男	0	0	0	1	1	0	0	0	0	3	9	7	5	19.1513	0	Dataset1
23047	女	0	0	0	1	3	0	0	0	0	0	0	24	0	19.6112	0	Dataset1
24314	女	0	0	0	1	2	0	0	0	0	1	10	20	0	20.1068	0	Dataset1
24081	女	0	0	1	1	3	0	0	0	0	4	21	22	0	19.0801	1	Dataset1
24386	女	0	0	1	2	2	0	0	0	0	8	19	12	12	19.0198	0	Dataset1
23531	男	0	0	0	2	3	0	0	0	0	2	11	23	0	19.154	0	Dataset1
27666	男	0	0	0	1	3	0	0	0	1	1	6	26	2	19.1485	0	Dataset1
29481	女	0	0	0	2	3	0	0	0	0	3	18	19	0	19.1485	0	Dataset1
28090	女	0	0	0	1	3	0	0	0	0	4	15	18	0	19.1485	0	Dataset1
28161	女	0	0	1	2	3	0	0	0	0	5	18	18	7	19.1485	0	Dataset1
28077	女	0	0	0	2	3	0	0	0	0	1	7	19	1	19.1485	0	Dataset1
28461	女	0	0	0	2	3	0	0	0	3	8	21	19	11	19.1485	0	Dataset1
28569	女	0	0	1	3	3	1	0	1	1	8	48	17	19	18.5982	1	Dataset1
23717	女	0	0	0	1	3	0	0	1	0	4	18	19	6	19.154	2	Dataset1
28452	女	0	0	1	1	4	0	0	0	1	9	17	20	12	18.4203	1	Dataset1
25588	女	0	0	1	1	3	0	0	0	2	6	3	20	3	18.8172	0	Dataset1
4302	女	0	0	1	2	3	0	1	0	0	12	47	24	19	19.6085	0	Dataset1
25595	男	0	0	0	2	3	0	0	0	1	5	54	19	12	19.8768	0	Dataset1
23614	女	0	0	0	2	3	0	1	0	2	4	41	14	11	20.5038	0	Dataset1
23440	女	0	0	1	1	2	0	0	1	0	5	7	12	8	19.154	1	Dataset1
28208	女	1	0	0	2	3	0	0	0	3	0	23	19	6	20.1287	0	Dataset1
28440	男	0	0	0	2	3	0	1	0	1	7	17	14	10	18.4312	0	Dataset1
28433	女	0	0	0	1	3	0	0	0	1	1	9	21	0	19.2416	1	Dataset1
28537	女	0	0	0	1	2	0	0	0	0	3	0	15	9	18.6393	0	Dataset1
23427	女	0	0	0	2	3	0	1	1	0	1	17	14	9	20.9966	0	Dataset1
28417	女	0	0	0	2	3	0	0	0	1	0	10	15	11	19.1485	0	Dataset1
28419	女	0	0	0	1	4	0	1	0	1	2	11	22	9	18.6311	0	Dataset1
28770	男	0	0	1	1	2	0	0	0	1	5	11	13	7	19.1485	0	Dataset1
23702	男	0	0	0	1	3	0	0	0	0	2	4	24	0	19.154	0	Dataset1
28073	女	0	0	0	1	4	0	0	0	0	0	3	19	0	19.1485	0	Dataset1
28451	女	0	0	0	2	2	0	1	0	1	4	17	16	12	19.3703	0	Dataset1
23220	男	0	0	0	1	4	0	0	0	2	3	26	22	8	19.3676	0	Dataset1
28606	女	0	0	0	1	4	0	0	0	0	0	0	26	0	19.0801	0	Dataset1
28590	女	0	0	0	1	3	0	0	0	0	6	15	23	0	18.3847	0	Dataset1
23737	女	0	0	0	1	3	0	0	1	0	2	3	20	7	18.4832	0	Dataset1
28193	女	0	0	0	1	3	0	0	0	2	6	26	18	4	19.1485	0	Dataset1
28207	男	0	0	0	1	3	0	0	0	2	3	21	19	1	18.9925	0	Dataset1
19196	男	0	0	1	4	1	2	1	1	1	12	66	8	25	20.5448	1	Dataset1
10013	男	0	0	1	2	1	0	1	0	2	7	19	12	18	21.5195	0	Dataset1
23327	男	0	0	1	2	2	0	1	0	0	10	16	16	8	19.5099	0	Dataset1
23089	女	0	0	1	1	2	0	0	0	3	5	31	16	9	18.7406	0	Dataset1
23329	女	0	0	0	2	3	0	1	0	0	2	8	19	4	18.2998	0	Dataset1
23088	男	0	1	1	1	3	0	0	1	7	7	9	14	19	19.154	1	Dataset1
23340	男	0	0	0	2	3	0	1	0	2	6	29	23	20	19.1403	0	Dataset1
24721	女	0	0	0	1	3	0	0	0	0	3	8	21	8	18.7433	0	Dataset1
26876	男	0	0	0	1	3	0	0	0	0	1	2	16	5	19.1485	0	Dataset1
29484	女	0	0	0	1	3	0	0	0	0	2	0	22	0	19.1321	0	Dataset1
19137	女	0	0	1	2	2	1	1	0	0	11	39	8	12	19.9507	0	Dataset1
23760	男	0	0	0	1	4	0	0	0	1	2	2	13	5	19.2416	0	Dataset1
23352	女	0	0	1	1	4	0	1	1	0	6	14	22	17	18.6338	0	Dataset1
28566	男	0	0	0	1	3	0	0	0	0	1	1	20	9	18.7953	0	Dataset1
23465	男	0	0	0	2	3	0	0	0	0	0	8	13	1	19.154	1	Dataset1
23887	男	0	0	0	1	1	0	0	0	1	3	7	19	0	19.1513	0	Dataset1
18710	女	0	0	1	2	3	2	1	1	0	12	23	11	24	20.0027	2	Dataset1
28551	女	0	1	1	1	1	2	1	1	6	9	20	9	26	19.1485	1	Dataset1
18252	女	0	0	1	2	3	0	0	0	0	4	28	16	2	19.833	0	Dataset1
28358	女	0	1	1	5	3	2	1	1	7	12	28	12	26	19.8248	2	Dataset1
18560	女	0	1	0	3	3	0	0	1	6	2	39	17	16	20.3121	3	Dataset1
27662	女	0	0	0	2	3	0	0	0	0	5	11	15	0	18.9843	0	Dataset1
23109	男	1	0	0	1	3	0	0	0	2	5	6	25	10	19.0883	0	Dataset1
10514	女	0	0	1	2	2	0	1	1	4	9	66	15	25	21.2676	2	Dataset1
26627	女	0	0	1	1	3	0	0	0	0	4	29	18	1	18.3381	0	Dataset1
25372	女	0	0	0	1	3	0	0	0	0	0	16	22	0	19.4579	1	Dataset1
25344	女	0	0	0	2	3	0	0	0	0	2	7	21	4	18.5298	0	Dataset1
25123	女	0	0	1	2	2	0	0	0	0	5	13	13	1	19.1951	1	Dataset1
25192	女	0	0	1	1	3	0	0	0	0	8	21	18	8	19.1485	0	Dataset1
25341	女	0	0	0	1	1	0	0	0	0	6	3	14	10	19.1485	0	Dataset1
25110	女	0	0	0	2	3	0	0	0	0	1	24	18	3	19.1485	0	Dataset1
25053	女	0	0	0	1	3	0	0	0	0	0	20	19	5	18.7461	0	Dataset1
25342	女	0	0	1	3	2	0	0	1	1	9	30	17	9	18.9213	0	Dataset1
25370	女	0	0	1	2	3	1	2	1	2	7	31	17	14	19.1485	2	Dataset1
25021	女	0	0	1	2	2	0	1	0	0	3	24	19	15	18.9322	0	Dataset1
25351	女	0	0	0	1	3	0	0	0	0	2	23	22	0	19.8084	0	Dataset1
25357	女	0	0	0	1	4	0	0	0	0	0	3	23	0	19.1485	1	Dataset1
25161	女	0	0	1	1	3	2	1	0	1	9	7	19	16	18.6585	1	Dataset1
25020	女	0	0	0	2	3	0	1	0	0	5	25	16	19	19.6578	0	Dataset1
25017	女	0	0	0	2	2	0	1	0	1	3	23	14	7	20.7009	0	Dataset1
10063	女	1	0	1	3	3	0	1	0	1	12	35	17	15	23.6386	0	Dataset1
25380	女	0	0	1	1	1	0	2	1	2	9	27	12	16	18.601	4	Dataset1
17878	女	0	0	1	3	3	2	1	1	0	8	41	12	20	20.2957	1	Dataset1
25343	女	0	0	0	1	2	0	0	0	0	4	17	18	7	19.1485	0	Dataset1
25377	女	0	0	0	1	4	0	0	1	0	1	28	20	3	19.1485	0	Dataset1
25355	女	0	0	0	1	4	0	0	0	0	3	19	17	5	19.9589	0	Dataset1
25335	女	0	0	1	3	3	0	0	0	0	9	11	13	1	19.269	0	Dataset1
25385	女	0	0	1	1	2	0	1	0	0	5	15	14	11	19.1485	0	Dataset1
25360	女	0	0	0	1	3	0	0	0	0	3	7	21	5	19.3758	0	Dataset1
25353	女	0	0	0	1	3	0	0	0	1	3	40	17	9	19.3347	0	Dataset1
25029	女	0	0	1	2	1	1	1	0	5	4	14	5	10	18.9733	3	Dataset1
25349	女	0	0	0	1	3	0	0	0	1	0	25	22	2	18.5298	0	Dataset1
25026	女	0	0	0	2	3	0	0	1	3	3	31	18	15	19.1348	0	Dataset1
25345	女	0	0	0	1	3	0	0	0	0	0	0	21	1	19.0089	0	Dataset1
25138	女	0	0	0	1	2	0	0	0	0	1	6	18	1	19.4387	0	Dataset1
25361	女	0	0	0	1	3	0	0	0	1	0	9	21	0	19.1485	0	Dataset1
25393	女	0	0	0	1	4	0	0	0	0	4	26	20	14	19.1485	1	Dataset1
25347	女	0	0	0	1	3	0	0	0	0	1	24	18	10	19.1485	1	Dataset1
25186	男	0	0	0	1	3	0	0	0	0	1	16	17	0	19.1513	0	Dataset1
10405	男	0	1	1	3	2	3	2	1	6	12	40	9	26	20.5311	2	Dataset1
17907	男	0	0	1	1	4	1	1	0	1	12	9	25	36	20.2957	0	Dataset1
25381	男	0	0	1	1	3	0	0	0	0	8	32	21	4	19.1485	0	Dataset1
25038	男	0	0	0	1	3	0	0	0	1	0	27	21	2	20.0246	1	Dataset1
25332	男	0	0	0	1	3	0	1	0	3	4	39	20	16	19.4086	0	Dataset1
10664	男	0	0	0	1	2	0	1	0	1	8	37	12	19	22.59	0	Dataset1
25375	男	0	0	0	1	2	0	0	0	2	1	21	16	10	19.1485	1	Dataset1
25311	女	0	0	0	1	3	0	0	0	1	3	19	23	5	19.707	0	Dataset1
24792	女	0	0	1	2	3	0	1	0	0	8	50	20	13	19.1513	0	Dataset1
25310	女	0	0	1	1	3	0	0	1	0	10	12	20	13	18.3025	1	Dataset1
25329	女	0	0	0	1	3	0	0	0	0	1	6	19	0	21.1472	0	Dataset1
25319	女	0	0	0	1	4	0	0	0	2	4	4	19	3	19.1978	0	Dataset1
25187	女	0	0	1	1	3	2	1	0	0	6	6	10	14	18.4531	0	Dataset1
25318	女	0	0	1	1	3	0	1	1	0	11	17	15	13	19.1485	1	Dataset1
25293	女	0	0	0	2	2	0	0	0	0	10	12	16	4	18.7981	0	Dataset1
24939	女	0	0	0	1	2	0	0	0	0	1	4	23	4	19.2854	0	Dataset1
25308	女	0	0	0	1	3	0	0	0	0	0	3	20	0	18.2341	0	Dataset1
25317	女	1	0	0	1	2	0	0	0	2	4	9	18	10	19.1485	0	Dataset1
25383	女	0	0	0	1	3	0	0	0	1	1	11	18	0	19.6687	0	Dataset1
9967	女	0	1	1	1	2	2	0	0	10	7	12	10	7	21.2621	0	Dataset1
24758	女	0	0	0	1	3	0	0	0	0	0	2	23	3	19.7618	0	Dataset1
24610	女	0	0	0	1	3	0	0	0	0	2	7	17	11	20.4134	0	Dataset1
25296	女	0	0	0	2	3	0	0	1	3	3	30	17	8	19.1485	1	Dataset1
9905	女	0	0	0	1	3	0	0	1	1	8	13	12	14	22.6229	0	Dataset1
24753	女	0	0	0	1	3	0	0	0	1	1	4	19	0	19.1513	0	Dataset1
24783	女	0	0	0	1	3	0	1	0	2	5	10	19	15	19.2498	0	Dataset1
25139	女	0	0	0	1	3	0	0	0	0	1	35	22	1	19.3593	0	Dataset1
17669	女	0	0	1	2	4	0	1	1	0	3	37	17	17	20.2957	0	Dataset1
24762	女	0	0	0	2	3	0	0	0	0	1	21	21	0	19.3566	0	Dataset1
25307	女	0	0	0	2	4	0	0	0	3	0	20	24	7	18.7762	0	Dataset1
25334	女	0	0	0	1	3	0	0	0	3	2	3	24	0	21.347	0	Dataset1
25079	女	0	0	0	1	2	0	0	0	0	1	6	10	2	19.3155	1	Dataset1
25325	女	0	0	1	1	4	0	0	0	1	5	36	19	7	19.3238	0	Dataset1
25371	女	0	0	0	3	3	0	0	0	0	5	18	21	1	18.757	0	Dataset1
24766	女	0	0	1	1	3	0	0	0	2	4	10	20	5	20.011	0	Dataset1
25327	女	0	0	1	2	3	0	2	1	0	11	67	18	14	18.5982	1	Dataset1
25336	女	0	0	0	1	3	0	0	0	2	0	8	23	2	19.1485	0	Dataset1
25392	男	0	0	1	1	3	0	0	0	0	5	5	21	4	19.2088	0	Dataset1
25088	男	0	0	0	1	3	0	1	0	0	1	55	19	5	18.2806	0	Dataset1
25384	男	0	0	0	1	3	0	0	0	0	0	13	22	0	19.1485	0	Dataset1
24845	男	0	0	0	2	2	0	0	0	0	4	8	18	3	19.1513	0	Dataset1
24795	男	0	0	0	2	4	0	0	0	1	2	31	26	3	19.5154	1	Dataset1
24863	男	0	0	0	1	3	0	0	0	0	1	18	22	0	19.0171	0	Dataset1
25156	男	0	0	0	1	3	0	0	0	0	0	1	21	2	20.8022	0	Dataset1
24798	男	0	0	1	2	2	0	0	0	0	4	12	12	9	19.1513	0	Dataset1
25324	男	0	0	0	1	4	0	0	0	0	3	8	21	4	19.1485	0	Dataset1
25306	男	0	0	0	1	3	0	0	0	0	1	14	19	3	18.3628	0	Dataset1
25300	男	0	0	0	1	3	0	0	0	1	4	4	20	4	19.1485	0	Dataset1
24116	男	0	0	0	1	2	0	0	0	0	1	10	16	5	20.011	0	Dataset1
17645	男	0	0	1	2	1	0	1	0	1	10	38	8	22	21.9055	1	Dataset1
25369	女	0	0	0	1	4	0	0	0	1	0	6	19	2	19.1485	0	Dataset1
24948	女	0	0	0	1	3	0	0	0	0	1	9	21	1	19.1513	0	Dataset1
24628	女	0	0	1	1	3	0	1	0	0	7	7	17	6	20.2108	0	Dataset1
29416	女	0	0	0	1	4	0	0	0	0	0	39	26	0	19.1458	0	Dataset1
25910	女	0	0	0	1	3	0	0	0	0	0	9	23	1	19.4251	0	Dataset1
24984	女	0	0	0	1	4	0	0	0	0	0	25	25	0	19.1513	0	Dataset1
24982	女	0	0	0	1	4	0	0	0	0	3	18	25	0	19.3238	0	Dataset1
24697	女	0	1	1	1	2	0	0	1	6	7	22	17	6	19.499	0	Dataset1
29407	女	0	0	0	2	4	1	1	0	0	4	44	19	11	18.7214	0	Dataset1
29404	女	0	0	0	1	3	0	0	0	0	0	0	21	0	18.8474	0	Dataset1
29412	女	0	0	0	1	3	0	1	0	1	2	22	18	4	20.8049	0	Dataset1
24622	女	0	0	1	1	1	0	0	0	3	9	23	4	9	18.4257	0	Dataset1
24620	女	0	0	0	1	3	0	0	0	0	0	0	22	0	20.6379	0	Dataset1
24632	女	0	0	1	1	3	0	0	0	0	3	23	18	3	19.1513	0	Dataset1
24900	女	0	0	0	1	4	0	0	0	1	1	32	22	9	17.5715	0	Dataset1
24991	女	0	0	0	1	3	0	0	0	0	1	15	15	4	19.2608	0	Dataset1
24901	女	0	0	0	1	3	0	0	0	0	5	12	20	11	18.9322	0	Dataset1
10911	女	0	0	1	4	2	2	1	0	0	10	43	11	21	21.347	2	Dataset1
29408	女	0	0	0	2	3	0	0	0	0	4	16	21	2	19.0034	0	Dataset1
24704	女	0	0	0	1	3	0	0	0	0	8	26	21	7	19.4141	0	Dataset1
24913	女	0	0	0	1	4	0	0	0	0	2	22	23	7	19.6112	0	Dataset1
23817	女	0	0	0	3	4	0	0	0	0	0	34	25	0	18.6831	0	Dataset1
5914	女	0	1	1	2	3	1	1	1	7	4	47	14	15	21.2621	1	Dataset1
29415	女	0	0	0	1	3	0	1	0	0	4	17	17	10	19.3949	0	Dataset1
24911	女	0	0	0	1	4	0	0	0	0	1	4	24	2	19.1513	1	Dataset1
9971	女	0	0	0	3	3	0	0	0	2	5	50	21	21	21.9055	0	Dataset1
29417	男	0	0	0	1	3	0	0	0	1	3	21	17	9	20.794	0	Dataset1
9982	男	0	0	1	3	2	1	1	1	0	5	17	10	17	21.0513	1	Dataset1
29413	男	0	0	0	1	3	0	0	0	0	1	5	22	0	19.2882	0	Dataset1
29409	男	0	0	0	1	4	0	0	0	0	0	18	25	0	19.1458	0	Dataset1
24907	男	0	0	0	1	3	0	0	0	0	0	17	18	4	20.9391	0	Dataset1
24938	男	0	0	0	1	3	0	0	0	0	0	10	22	0	18.7023	0	Dataset1
9985	男	0	0	1	2	2	0	0	0	1	8	21	8	19	21.2704	1	Dataset1
24990	男	0	0	0	2	2	0	0	0	1	3	26	14	0	20.4545	0	Dataset1
24985	女	0	0	0	1	3	0	0	0	1	4	8	17	4	18.4559	0	Dataset1
24987	男	0	0	0	1	3	0	0	0	0	0	0	19	1	18.7981	0	Dataset1
23078	女	0	0	0	1	2	0	0	0	1	1	7	12	1	19.384	0	Dataset1
23662	女	0	0	1	2	2	0	1	1	0	10	21	13	19	19.165	0	Dataset1
23645	女	0	0	0	2	2	0	1	1	0	6	14	11	13	18.8227	1	Dataset1
23660	女	0	0	1	3	3	0	0	0	0	11	36	16	12	18.9103	0	Dataset1
23725	女	0	0	0	1	3	0	0	0	0	4	27	20	8	19.1075	0	Dataset1
23235	女	0	0	0	1	3	0	0	0	2	1	14	18	7	19.5537	0	Dataset1
23364	女	0	0	0	1	4	0	0	0	0	0	9	18	1	19.54	0	Dataset1
23990	女	0	0	0	1	3	0	0	0	0	4	3	18	3	18.6612	0	Dataset1
23989	女	0	0	0	2	2	0	0	0	0	1	10	15	4	18.7652	1	Dataset1
23236	女	0	0	0	2	3	0	0	0	0	1	20	20	0	19.1622	0	Dataset1
23762	女	0	0	0	1	3	0	0	0	0	3	6	21	14	19.154	0	Dataset1
23640	女	0	0	0	1	3	0	0	0	1	3	39	16	3	19.154	0	Dataset1
23237	女	0	0	0	2	3	0	0	0	0	1	24	18	7	18.0972	0	Dataset1
16667	女	0	0	1	2	3	1	1	1	0	8	43	14	22	20.8734	1	Dataset1
23995	女	0	0	0	1	3	0	0	0	0	0	14	25	4	19.4141	0	Dataset1
23682	女	0	0	1	2	2	0	0	0	0	4	6	14	2	19.154	0	Dataset1
23035	男	0	0	0	1	3	0	0	0	0	0	5	20	0	19.1567	0	Dataset1
4782	男	0	0	1	1	2	2	0	0	1	8	31	11	14	21.2649	0	Dataset1
23665	男	0	0	0	1	3	0	0	0	0	3	4	18	5	19.154	0	Dataset1
23648	男	0	0	0	1	3	0	0	0	1	0	2	16	1	19.154	0	Dataset1
16700	男	0	0	1	3	1	2	2	1	4	7	56	4	37	19.4606	2	Dataset1
23341	男	0	0	1	1	3	0	0	0	0	2	31	15	3	21.076	0	Dataset1
23992	男	0	0	0	1	3	0	0	0	0	5	7	17	9	19.154	0	Dataset1
23708	男	0	0	0	1	3	0	0	0	0	1	8	23	1	19.2827	0	Dataset1
23986	男	0	0	0	1	3	0	0	0	0	1	0	24	0	19.154	0	Dataset1
23103	男	0	0	1	5	2	0	0	0	0	5	36	18	4	19.154	0	Dataset1
23671	男	0	0	0	1	3	0	0	0	0	2	1	20	3	19.154	0	Dataset1
23987	男	0	0	0	2	3	0	0	0	0	0	5	21	2	19.154	1	Dataset1
23299	男	0	0	1	3	3	0	1	0	0	10	56	17	16	20.3094	1	Dataset1
29410	女	0	0	1	3	3	0	1	1	0	4	34	19	9	21.1745	0	Dataset1
26081	女	0	0	1	1	4	3	1	0	1	7	27	24	10	19.1485	0	Dataset1
24885	女	0	0	1	3	3	0	1	0	1	10	33	17	10	17.5496	0	Dataset1
25042	女	0	0	1	2	3	0	0	0	1	3	22	21	5	19.2471	0	Dataset1
26047	女	0	0	1	2	2	0	0	0	0	8	29	17	5	19.3895	0	Dataset1
26360	女	0	0	1	1	1	0	0	0	0	6	9	15	0	19.1485	0	Dataset1
23979	女	0	0	0	1	4	0	0	0	0	5	13	20	0	20.0055	0	Dataset1
29379	女	0	0	0	2	3	0	0	1	2	1	15	21	13	20.2546	0	Dataset1
24846	男	0	0	0	2	2	2	1	0	1	2	24	20	9	20.3532	0	Dataset1
24906	男	0	0	0	1	3	0	0	0	0	3	1	16	0	18.3737	0	Dataset1
24929	男	0	0	0	1	3	0	0	0	1	0	0	17	0	19.6085	0	Dataset1
24616	男	0	0	1	1	2	0	1	0	0	6	12	11	3	19.0664	0	Dataset1
25196	男	0	0	1	2	2	2	1	0	0	10	14	13	10	19.4552	0	Dataset1
25172	男	0	0	0	1	3	0	0	0	1	5	6	21	2	19.1485	1	Dataset1
24924	男	0	0	0	3	1	0	1	0	0	6	9	13	3	19.0116	1	Dataset1
28966	男	0	0	0	1	2	0	0	0	0	2	20	19	4	19.1485	0	Dataset1
24850	男	0	0	1	1	2	0	0	0	0	5	25	11	6	19.9918	0	Dataset1
24928	男	0	0	0	1	2	0	0	1	1	0	2	16	5	19.1513	0	Dataset1
29104	男	0	0	0	1	3	0	0	0	1	5	24	19	7	18.7734	0	Dataset1
25175	男	0	0	1	1	3	0	0	0	0	9	3	17	7	19.0335	1	Dataset1
25203	男	0	0	0	1	2	0	0	0	1	7	33	13	2	19.1485	0	Dataset1
24860	男	0	0	0	2	2	0	0	0	0	0	32	15	0	19.1513	0	Dataset1
17932	男	0	0	1	2	1	1	1	1	0	8	38	11	14	20.616	2	Dataset1
26092	男	0	0	0	1	3	0	0	0	1	1	19	17	0	19.447	1	Dataset1
24821	男	0	0	1	1	2	0	0	0	0	3	8	11	5	19.1485	0	Dataset1
17721	男	0	0	1	4	3	2	1	0	2	10	40	19	22	20.6626	1	Dataset1
24899	男	0	0	1	3	1	2	1	1	1	12	68	9	19	19.1513	1	Dataset1
25198	男	0	0	1	1	4	0	1	0	4	6	34	24	10	19.1485	0	Dataset1
24840	男	0	0	1	2	2	2	1	1	0	10	32	16	17	19.1513	0	Dataset1
28317	男	0	0	1	1	2	2	1	0	0	7	8	20	9	19.0007	1	Dataset1
27668	男	0	0	0	1	3	0	0	0	1	2	9	22	2	19.2115	0	Dataset1
28442	男	0	0	1	1	3	0	1	0	1	8	25	21	8	19.1485	0	Dataset1
25153	男	0	0	0	2	3	1	0	1	0	4	40	18	13	18.9076	0	Dataset1
25367	男	0	0	0	2	2	0	0	0	0	3	26	15	9	19.6769	0	Dataset1
25194	男	0	0	0	1	3	0	0	0	0	6	10	20	7	18.2094	0	Dataset1
25176	男	0	0	0	3	2	0	0	0	0	0	7	13	0	19.1485	0	Dataset1
24944	女	0	0	0	1	3	0	0	0	0	1	8	22	0	18.8747	0	Dataset1
24941	女	0	0	1	2	4	0	0	0	0	2	28	25	2	19.1595	0	Dataset1
24950	女	0	0	0	1	3	0	0	0	1	4	7	18	9	19.5565	0	Dataset1
24949	女	0	0	1	2	4	0	0	0	0	3	18	22	2	18.694	0	Dataset1
24908	女	0	0	0	1	2	0	0	0	1	2	11	18	9	20.3641	0	Dataset1
24931	女	0	0	1	2	3	0	0	0	0	5	24	20	4	19.4278	0	Dataset1
24890	女	0	0	0	2	4	0	0	0	0	8	9	13	9	19.1513	0	Dataset1
24960	女	0	0	0	1	3	0	0	0	0	1	0	23	0	19.447	0	Dataset1
24973	女	0	0	0	2	3	0	0	0	0	1	17	17	1	19.2033	0	Dataset1
24886	女	0	0	1	1	3	0	0	0	1	7	15	16	7	19.1513	0	Dataset1
24892	女	0	0	0	1	3	0	0	0	0	2	1	19	3	18.9569	0	Dataset1
24946	女	0	0	1	3	3	0	0	1	0	6	12	20	2	19.2197	0	Dataset1
18304	女	0	0	1	4	2	1	1	0	0	12	34	12	11	20.2957	2	Dataset1
24896	女	0	0	1	1	2	0	2	1	2	7	4	13	6	18.6612	0	Dataset1
24925	女	0	0	0	2	3	0	0	0	2	6	18	19	6	18.8583	0	Dataset1
24917	女	0	0	0	1	3	0	0	0	0	4	2	16	0	18.7406	0	Dataset1
24923	女	0	0	0	2	2	0	0	0	0	0	11	17	0	19.1513	0	Dataset1
24898	女	0	0	0	1	3	0	0	0	0	0	3	20	0	19.1513	0	Dataset1
10179	女	0	0	1	1	4	0	1	0	2	11	31	18	17	21.5168	0	Dataset1
24884	女	0	0	1	2	3	0	1	0	1	8	43	21	13	19.3922	0	Dataset1
24761	女	0	0	0	1	2	0	0	1	0	1	6	18	11	19.1513	0	Dataset1
10964	女	0	0	1	1	2	0	1	1	0	12	11	17	19	20.3066	0	Dataset1
18357	男	0	0	0	3	3	1	2	1	2	0	53	16	32	20.0082	1	Dataset1
24921	男	0	0	0	2	3	0	0	0	0	6	15	17	5	19.1513	0	Dataset1
24912	男	0	0	1	2	4	0	0	0	0	9	49	25	3	18.6858	0	Dataset1
24945	男	0	0	1	2	3	0	0	0	0	5	33	23	6	19.1513	0	Dataset1
24959	男	0	0	0	1	2	0	0	0	0	1	26	20	8	19.3539	0	Dataset1
24930	女	0	0	1	1	3	2	1	0	0	8	33	14	19	18.935	1	Dataset1
24136	女	0	0	1	3	3	0	1	2	1	11	20	17	25	20.1533	2	Dataset1
24268	男	0	0	0	1	3	0	0	0	0	7	14	14	4	19.269	0	Dataset1
24577	男	0	0	0	1	3	0	0	0	0	0	1	16	0	19.1513	0	Dataset1
24501	女	0	0	1	2	4	0	1	0	0	8	11	20	9	19.8111	0	Dataset1
24370	男	0	0	0	2	3	0	0	0	0	4	31	18	1	19.3101	0	Dataset1
24214	女	0	0	0	2	3	2	0	0	0	1	37	17	6	19.4634	0	Dataset1
24302	男	0	0	1	1	3	0	1	0	0	3	10	23	7	19.3621	0	Dataset1
24468	男	0	0	0	2	3	0	0	0	0	5	37	17	0	20.3723	0	Dataset1
24567	男	0	0	0	1	3	0	0	0	1	1	7	25	3	20.2272	0	Dataset1
3729	男	0	0	1	3	3	3	2	1	1	6	53	15	33	21.2649	3	Dataset1
24492	男	0	0	0	2	4	0	0	0	2	3	5	24	0	18.59	0	Dataset1
24482	女	0	0	0	1	3	0	0	0	0	1	6	17	0	18.5517	0	Dataset1
15332	男	0	0	0	2	1	1	0	1	3	5	24	9	26	20.3012	1	Dataset1
24491	女	0	0	0	1	4	0	0	0	0	0	19	23	0	19.2553	0	Dataset1
24349	女	0	0	0	2	3	0	1	0	0	7	17	19	10	19.5099	0	Dataset1
24117	女	0	0	0	2	4	0	0	0	0	4	42	18	12	18.976	0	Dataset1
24441	女	0	0	0	1	3	0	0	0	0	3	14	16	1	18.6393	0	Dataset1
24463	男	0	0	1	2	3	0	1	0	1	7	23	19	9	19.3457	1	Dataset1
24512	女	0	0	0	2	2	0	0	0	0	1	20	15	4	19.1513	0	Dataset1
24474	女	0	0	0	2	3	0	0	0	0	2	40	18	3	18.4668	0	Dataset1
24486	女	0	0	1	1	1	0	1	0	0	5	21	12	4	19.1513	0	Dataset1
24046	男	0	0	0	1	2	0	1	0	0	2	4	14	3	19.1513	0	Dataset1
24553	女	0	0	0	1	2	0	0	0	2	3	1	10	2	18.4093	0	Dataset1
24483	女	0	0	0	1	2	0	1	1	2	6	11	15	18	18.1739	2	Dataset1
24439	男	0	0	0	1	2	0	0	0	0	1	19	17	5	19.2608	0	Dataset1
24263	女	0	0	0	1	3	0	0	0	0	0	0	22	0	18.5955	0	Dataset1
23283	女	1	0	0	2	4	0	1	1	2	2	27	26	10	20.4791	0	Dataset1
3898	女	0	0	1	5	2	0	1	1	4	12	40	10	27	21.2649	1	Dataset1
24084	女	0	0	1	2	3	1	1	1	1	6	20	17	9	20.3313	0	Dataset1
24529	男	0	0	0	2	3	0	0	0	0	2	27	24	6	20.5175	0	Dataset1
3904	男	0	0	1	1	3	2	0	0	0	9	38	18	18	21.2649	0	Dataset1
24037	男	0	0	0	1	1	0	0	0	0	4	12	9	1	19.1513	1	Dataset1
24493	女	0	0	0	1	4	0	0	0	0	1	28	22	2	18.8392	0	Dataset1
24445	男	0	0	0	1	3	0	0	0	0	0	25	21	0	18.6092	2	Dataset1
24454	男	0	0	0	2	3	0	0	0	0	2	17	13	14	18.9268	0	Dataset1
24023	女	0	0	0	1	3	0	0	0	0	4	1	12	1	19.1513	0	Dataset1
24471	男	0	0	0	2	4	0	0	0	0	0	9	25	6	19.5893	0	Dataset1
16027	女	0	0	1	3	3	0	1	0	0	11	41	18	17	19.9589	0	Dataset1
23434	女	1	0	0	1	3	0	0	0	2	6	8	14	16	20.9008	0	Dataset1
23836	女	0	0	1	1	4	0	1	1	1	8	13	21	8	19.1513	0	Dataset1
24448	女	0	0	1	1	3	0	1	0	3	5	12	15	7	19.1513	0	Dataset1
24031	女	0	0	1	1	2	2	1	1	0	7	8	12	24	19.8248	0	Dataset1
13678	男	0	1	0	2	2	0	2	1	6	7	15	11	12	20.6626	2	Dataset1
24071	女	0	0	1	1	4	0	0	0	0	4	21	22	0	18.6721	0	Dataset1
24527	男	0	0	0	1	3	0	0	0	0	2	8	19	2	19.4114	0	Dataset1
24495	女	0	0	0	1	3	0	0	0	0	4	2	20	0	19.6468	0	Dataset1
24115	男	0	0	0	2	3	0	0	0	0	0	10	14	3	19.1513	2	Dataset1
24125	男	0	0	1	1	3	0	0	0	0	7	8	19	1	19.0089	0	Dataset1
24462	男	0	0	0	1	3	0	0	1	0	0	5	16	1	19.2827	0	Dataset1
3724	男	0	0	1	1	3	0	2	0	0	12	11	18	18	21.2649	0	Dataset1
24224	女	0	0	1	1	3	0	0	0	0	4	15	13	6	19.1513	0	Dataset1
24309	男	0	0	0	1	4	0	0	0	0	4	24	22	7	19.4552	0	Dataset1
19027	男	0	0	0	3	3	2	2	2	2	0	40	21	35	21.3251	3	Dataset1
24230	女	0	0	0	1	3	0	0	0	1	1	10	17	6	19.9918	0	Dataset1
4156	女	0	0	1	3	3	0	1	0	0	4	36	18	16	22.1136	0	Dataset1
24450	女	0	1	1	2	3	2	2	3	6	7	18	16	26	19.4415	0	Dataset1
24507	男	0	0	0	1	1	0	0	0	0	2	8	11	4	19.1513	1	Dataset1
24515	女	0	0	1	2	3	0	0	1	0	5	32	19	10	19.2252	1	Dataset1
24171	男	0	0	0	1	3	0	1	0	1	2	34	18	14	19.1513	0	Dataset1
24500	女	0	0	1	2	3	0	0	0	0	2	12	22	2	19.1513	0	Dataset1
24107	女	0	0	0	1	3	0	0	0	0	4	3	19	1	17.4648	0	Dataset1
24070	女	0	0	0	2	3	0	0	0	1	10	23	18	1	19.6851	1	Dataset1
16158	女	1	0	1	3	3	2	1	0	4	12	23	12	21	19.6797	2	Dataset1
27735	女	0	0	0	2	3	0	1	1	1	4	29	17	11	21.1061	0	Dataset1
24455	男	0	0	0	2	1	0	0	0	1	3	38	12	4	18.7598	1	Dataset1
24127	女	0	0	0	2	3	0	0	0	0	6	34	18	5	19.3046	1	Dataset1
15246	女	0	0	1	3	3	1	1	0	1	9	22	12	15	20.3751	1	Dataset1
23852	男	0	0	0	2	4	0	0	0	0	0	22	24	0	19.2225	0	Dataset1
24460	女	0	0	1	3	3	0	1	0	0	10	54	16	9	19.6222	0	Dataset1
24227	女	0	0	0	1	3	0	0	0	1	4	14	17	0	23.9644	0	Dataset1
24470	女	0	0	1	2	3	0	0	0	0	6	24	21	2	19.6167	0	Dataset1
24552	男	0	0	0	1	3	0	0	0	0	2	5	22	0	19.6851	0	Dataset1
3827	男	0	0	1	2	2	1	1	1	1	11	32	16	21	21.5222	3	Dataset1
16560	女	0	0	0	1	3	0	0	0	1	2	5	25	6	19.9042	0	Dataset1
24325	男	0	0	0	2	2	0	1	0	0	1	15	14	12	18.8583	1	Dataset1
24509	男	0	0	1	2	1	0	0	0	0	5	33	18	0	18.4914	1	Dataset1
23684	男	0	0	0	1	2	0	0	0	2	0	0	15	3	19.3785	0	Dataset1
23672	男	0	0	0	2	3	0	1	0	0	2	8	21	2	18.2971	0	Dataset1
24528	女	0	0	0	2	3	0	1	0	1	6	17	17	12	19.447	1	Dataset1
23145	男	0	0	1	2	2	2	2	1	0	10	32	12	20	17.6674	0	Dataset1
24061	男	1	0	1	4	1	2	1	2	1	11	57	11	32	18.9788	2	Dataset1
19364	女	0	0	1	2	3	0	1	1	0	12	35	16	19	20.2437	1	Dataset1
24496	女	0	0	0	1	3	0	0	0	1	1	0	19	1	18.6338	0	Dataset1
24475	女	0	0	1	2	3	0	1	0	2	9	40	20	14	20.3094	0	Dataset1
25799	女	0	0	1	1	3	0	1	0	1	6	14	20	6	19.1485	0	Dataset1
23714	男	0	0	1	1	3	0	0	0	1	6	21	19	12	20.1369	0	Dataset1
24535	女	0	0	0	1	3	0	0	0	0	1	3	20	0	18.4476	0	Dataset1
24039	女	0	1	1	2	2	0	1	1	9	9	36	10	21	18.4285	4	Dataset1
14838	男	0	0	0	3	3	2	1	1	1	4	41	13	32	21.2485	0	Dataset1
24149	女	0	0	1	1	3	0	0	0	0	4	34	20	1	19.1513	0	Dataset1
3660	男	0	0	1	3	3	0	2	1	1	5	37	15	21	21.2649	1	Dataset1
24395	女	0	0	1	2	3	0	1	1	0	11	17	19	6	18.2834	1	Dataset1
24595	男	0	0	0	1	3	0	0	0	0	4	38	18	1	20.6434	0	Dataset1
24242	女	0	0	0	2	2	0	0	0	0	4	18	13	2	19.1513	0	Dataset1
24382	女	0	0	0	1	3	0	0	0	0	3	5	15	1	18.4476	0	Dataset1
23400	男	0	0	1	1	3	0	0	0	0	5	16	20	1	18.5298	0	Dataset1
24320	女	0	0	1	2	3	0	0	0	0	5	25	18	8	18.1656	0	Dataset1
24156	男	0	0	0	2	3	0	0	0	1	6	7	17	3	19.6769	0	Dataset1
24035	男	1	0	1	2	2	0	3	1	3	12	34	12	33	19.7016	4	Dataset1
23048	女	0	0	0	2	4	0	0	0	2	1	3	23	0	18.2149	0	Dataset1
24228	男	0	0	0	1	3	0	0	0	0	1	2	12	2	19.1513	0	Dataset1
24594	男	0	0	1	3	1	0	1	0	1	7	21	11	19	19.1513	0	Dataset1
23976	女	0	0	0	1	3	0	1	0	0	2	4	17	4	19.154	0	Dataset1
24287	女	0	0	1	4	3	0	1	0	2	12	59	12	21	19.2745	0	Dataset1
24129	女	0	0	0	1	3	0	0	0	1	9	36	20	16	19.1513	0	Dataset1
24272	女	0	0	0	1	3	0	0	0	0	1	15	19	0	19.1513	0	Dataset1
23860	男	0	0	0	1	3	0	0	0	0	0	0	21	0	19.1513	0	Dataset1
24342	男	0	0	1	2	3	0	0	0	0	4	19	20	0	18.3819	0	Dataset1
25437	女	0	0	0	2	3	2	0	0	0	4	30	17	5	18.9213	0	Dataset1
24160	女	0	0	0	2	3	0	0	0	0	5	25	17	5	19.1294	0	Dataset1
24570	女	0	0	0	1	2	0	0	0	0	8	8	17	0	19.1513	0	Dataset1
24390	女	0	0	0	1	2	0	0	0	1	4	6	15	2	18.9432	0	Dataset1
3872	女	0	0	1	1	3	2	1	1	1	11	33	12	28	21.2649	2	Dataset1
23826	女	0	0	0	1	3	2	0	0	1	7	19	16	14	18.4066	0	Dataset1
24579	男	0	0	1	1	2	0	1	0	0	10	14	11	7	18.3546	2	Dataset1
24520	男	0	0	0	1	3	0	1	0	0	4	10	19	8	19.2608	0	Dataset1
24544	男	0	0	0	1	3	0	0	0	0	5	7	14	8	18.6256	0	Dataset1
24275	女	0	0	0	1	3	0	0	0	0	2	17	20	11	18.3272	0	Dataset1
23984	女	0	0	0	2	4	0	0	0	0	2	2	23	9	19.1978	0	Dataset1
24264	女	0	0	1	1	4	0	0	0	0	8	11	22	0	19.9562	0	Dataset1
24366	男	0	0	0	1	3	0	0	0	0	1	16	17	0	19.1513	0	Dataset1
24291	女	0	0	0	1	3	0	0	0	0	1	45	24	0	19.3785	0	Dataset1
23877	女	0	0	0	1	2	0	0	0	2	3	8	16	1	19.1978	2	Dataset1
3665	男	0	0	1	3	2	0	1	0	0	11	18	13	17	21.2649	1	Dataset1
24040	男	0	0	0	2	3	0	0	0	0	2	11	21	9	18.9487	0	Dataset1
24290	女	0	0	0	2	3	0	0	0	0	1	7	16	0	18.6119	0	Dataset1
24559	女	0	0	0	2	3	0	0	1	2	1	15	17	8	19.1513	1	Dataset1
24575	男	0	0	1	2	2	2	1	0	0	9	41	15	21	18.2341	0	Dataset1
24526	女	0	0	1	1	2	0	0	0	2	7	13	12	5	18.9076	0	Dataset1
24586	女	0	0	0	1	1	0	0	0	0	1	6	7	0	18.9541	0	Dataset1
19006	男	0	0	1	1	2	2	1	1	0	6	24	12	18	19.436	0	Dataset1
24369	女	0	0	1	1	3	0	0	0	0	5	32	18	6	19.1513	0	Dataset1
24557	女	0	0	0	2	3	0	0	0	0	7	46	18	3	17.4702	0	Dataset1
24596	男	0	0	0	1	4	0	0	0	0	3	4	20	9	19.1513	0	Dataset1
24563	男	0	0	0	1	3	0	0	0	0	1	2	18	7	19.2005	0	Dataset1
24274	男	0	0	1	1	3	0	0	0	0	7	27	18	5	19.1513	0	Dataset1
24548	男	0	0	0	1	3	2	0	0	3	5	23	21	15	19.2635	2	Dataset1
24202	女	0	0	0	2	2	0	0	0	0	2	25	15	4	19.2444	0	Dataset1
24456	男	0	0	0	2	2	0	0	0	1	3	11	15	4	20.4216	0	Dataset1
24576	女	0	0	0	1	3	0	0	0	0	1	10	16	1	18.2505	0	Dataset1
24592	男	0	0	0	2	3	0	0	0	0	4	12	21	0	19.1513	0	Dataset1
24124	男	0	0	0	2	2	0	0	0	0	1	7	13	0	18.2341	0	Dataset1
24547	男	0	0	1	2	2	1	0	0	1	7	8	11	4	19.1513	2	Dataset1
24318	男	0	0	1	1	2	0	0	0	0	8	27	15	5	19.2553	2	Dataset1
24569	女	0	0	1	1	2	0	0	0	0	9	8	16	4	18.3655	0	Dataset1
24330	女	0	0	0	1	3	0	0	0	0	0	3	21	0	18.4695	0	Dataset1
24298	女	0	0	0	1	3	0	0	0	0	2	23	16	8	17.8316	0	Dataset1
24295	女	0	0	0	2	3	0	0	0	0	1	30	22	1	19.1513	0	Dataset1
24584	男	0	0	0	1	2	0	0	0	0	3	8	16	2	18.5352	0	Dataset1
24572	女	0	0	1	2	4	0	0	0	0	4	24	24	2	19.1923	0	Dataset1
23472	男	0	0	1	2	2	0	0	0	0	5	20	14	9	19.154	0	Dataset1
16226	男	0	0	1	3	2	2	1	1	0	11	30	13	22	19.6222	1	Dataset1
24554	男	0	0	0	1	1	0	0	0	1	2	17	8	5	19.8686	0	Dataset1
29403	男	0	0	0	2	3	0	0	0	0	5	40	16	11	19.1294	0	Dataset1
3516	男	0	0	1	2	2	1	0	0	2	8	25	10	14	21.3662	0	Dataset1
24252	女	0	0	0	1	3	0	0	0	0	1	1	18	5	18.1547	0	Dataset1
24292	男	0	0	0	2	3	0	0	0	0	0	34	16	15	19.2635	0	Dataset1
24539	男	0	0	1	2	2	1	2	0	3	5	17	12	12	19.3566	1	Dataset1
24343	男	0	0	0	2	2	0	0	0	0	2	28	14	0	19.3457	0	Dataset1
11021	女	0	0	0	1	3	0	0	0	0	0	3	24	0	20.345	0	Dataset1
24223	女	0	0	0	1	3	0	0	0	0	1	24	19	0	19.1513	0	Dataset1
24273	女	0	0	1	1	3	0	1	0	0	3	26	22	7	19.5674	0	Dataset1
24582	女	0	0	0	1	3	0	0	0	1	1	2	14	0	18.4613	0	Dataset1
15485	女	1	0	1	2	3	0	1	1	1	6	55	19	17	20.3012	1	Dataset1
24112	女	0	0	0	1	3	0	0	0	0	1	17	18	0	19.2745	0	Dataset1
24332	男	0	0	1	2	3	0	0	0	0	3	6	17	0	19.2553	0	Dataset1
24355	女	0	0	0	1	4	0	0	0	4	2	12	24	4	18.6448	0	Dataset1
14823	女	0	0	1	2	4	0	0	0	1	6	45	22	15	20.0383	0	Dataset1
24226	男	0	0	1	1	3	0	1	0	3	5	21	15	10	18.8172	3	Dataset1
16311	女	0	0	1	3	2	2	2	3	4	11	26	8	36	20.3231	3	Dataset1
24313	男	0	0	1	1	2	0	0	0	1	6	3	16	0	18.7762	0	Dataset1
16569	男	0	0	0	1	1	0	0	1	5	3	6	10	5	20.0986	1	Dataset1
24363	男	0	0	0	2	2	0	0	0	0	2	23	16	8	18.6119	0	Dataset1
24080	男	0	0	1	2	3	0	0	0	1	4	31	17	1	19.1513	0	Dataset1
24339	男	0	0	1	1	3	0	1	0	0	8	3	22	7	19.3238	0	Dataset1
24489	女	1	1	1	1	3	0	0	1	9	11	39	20	17	19.1951	0	Dataset1
24209	女	0	0	1	1	4	0	0	0	0	2	13	20	2	19.3703	1	Dataset1
23028	女	0	0	0	2	3	0	0	0	0	0	22	21	0	18.5079	0	Dataset1
24029	男	0	0	0	2	1	2	0	0	3	3	13	9	24	19.1513	0	Dataset1
24197	女	0	0	0	2	2	0	0	0	1	4	21	15	19	19.1513	2	Dataset1
24095	女	0	0	0	2	3	0	0	0	0	0	27	20	5	19.6386	0	Dataset1
24222	女	0	0	0	1	3	0	0	0	0	1	30	24	1	19.1513	0	Dataset1
24324	女	0	0	0	1	3	0	0	0	0	0	0	24	0	18.8528	0	Dataset1
23970	男	0	0	0	1	1	0	0	0	0	2	7	16	6	20.7392	0	Dataset1
23674	男	0	0	0	1	3	0	0	0	1	0	10	23	0	20.8706	0	Dataset1
24296	男	0	0	0	1	3	0	0	0	0	0	6	21	0	20.4408	0	Dataset1
24075	男	0	0	0	1	2	0	0	0	3	0	0	21	0	20.8378	0	Dataset1
23633	男	0	0	0	1	4	0	0	0	0	4	9	25	5	19.3018	0	Dataset1
24499	女	0	0	1	2	3	0	0	0	0	5	14	21	2	18.8693	0	Dataset1
24523	女	1	0	0	2	3	1	1	0	1	2	6	20	2	18.527	0	Dataset1
24518	男	0	0	0	1	3	0	0	0	2	2	2	18	0	18.7023	0	Dataset1
24111	男	0	0	1	1	3	2	0	0	1	4	12	22	12	19.1513	0	Dataset1
24249	女	0	0	0	2	3	0	0	1	0	6	23	18	4	19.1513	0	Dataset1
24374	女	0	0	0	2	3	0	0	0	0	3	16	20	1	19.1513	0	Dataset1
24074	男	0	0	0	1	3	0	0	0	0	2	2	18	5	19.1513	0	Dataset1
24549	男	0	0	1	1	3	0	0	0	0	6	14	18	1	19.3812	0	Dataset1
24143	男	0	0	1	3	3	0	0	0	0	8	29	22	6	19.1513	0	Dataset1
24461	男	0	0	0	1	3	0	0	0	0	2	8	20	3	18.7543	0	Dataset1
15725	男	0	0	1	1	2	0	1	0	1	9	26	12	14	21.5359	0	Dataset1
16383	男	0	0	0	3	3	2	1	1	0	10	42	18	17	19.885	1	Dataset1
24281	女	0	0	0	2	3	0	0	0	0	3	26	19	7	17.4648	0	Dataset1
24396	男	0	0	0	1	3	0	0	0	0	1	7	23	0	19.9699	0	Dataset1
28607	男	0	0	0	3	2	0	0	0	0	1	16	13	0	18.4586	0	Dataset1
29304	男	0	0	1	1	3	0	0	0	0	11	22	21	6	18.9788	0	Dataset1
16108	女	0	0	0	3	3	2	2	0	0	4	40	14	34	19.6496	1	Dataset1
29434	男	0	0	0	1	2	0	0	0	0	5	5	15	4	18.5544	4	Dataset1
16099	女	0	1	1	2	2	2	0	1	7	8	15	13	12	20.7775	2	Dataset1
28301	女	0	0	0	1	3	0	0	0	1	3	10	21	4	19.217	0	Dataset1
29208	女	0	0	0	1	3	0	0	0	1	4	5	18	0	19.1157	1	Dataset1
28685	女	0	0	1	2	3	0	1	1	0	5	23	13	9	19.4524	0	Dataset1
29422	女	0	0	0	1	3	0	0	0	0	2	1	17	3	19.5866	0	Dataset1
28067	女	0	0	1	1	3	0	1	0	2	5	11	18	6	18.4969	0	Dataset1
29438	女	0	0	0	1	4	0	0	0	0	0	1	13	4	21.6509	0	Dataset1
29464	男	0	0	0	1	3	0	0	0	0	1	0	16	4	18.4339	1	Dataset1
29420	男	0	0	0	2	4	0	0	0	1	3	21	19	5	18.6338	0	Dataset1
28698	男	0	0	0	1	2	0	0	0	0	0	5	19	6	18.7214	0	Dataset1
27538	女	0	0	0	1	3	0	0	0	0	0	2	22	0	19.1485	0	Dataset1
28670	男	0	0	0	1	3	0	0	0	0	1	6	15	9	20.7556	0	Dataset1
28249	男	0	0	0	1	3	0	0	0	0	4	5	25	0	19.1485	0	Dataset1
29056	女	0	0	1	2	3	0	1	0	0	8	27	17	10	19.1485	1	Dataset1
29443	女	0	0	0	1	3	0	0	0	0	0	6	23	3	19.1485	0	Dataset1
26466	女	0	0	0	1	3	0	0	0	0	3	16	22	4	17.6619	0	Dataset1
29486	女	0	0	1	1	2	0	0	0	0	8	22	22	4	18.6256	0	Dataset1
28605	女	0	0	0	1	2	0	0	0	0	1	5	20	0	18.9021	0	Dataset1
29455	女	0	0	1	2	3	0	1	0	1	5	18	18	14	20.9254	0	Dataset1
28620	女	0	0	1	1	3	2	0	0	2	6	12	16	3	18.4778	1	Dataset1
29040	女	0	0	0	1	2	0	0	0	1	5	4	16	3	18.7981	0	Dataset1
29394	女	0	0	1	2	2	0	0	0	0	10	38	15	5	16.5175	0	Dataset1
28126	女	0	0	1	1	3	0	0	0	2	8	14	19	0	18.8008	0	Dataset1
29439	女	0	0	0	1	3	0	0	0	0	2	5	19	8	19.0253	0	Dataset1
29157	女	0	0	0	1	3	0	0	0	0	2	13	15	1	19.0116	0	Dataset1
28484	女	0	0	0	1	2	0	0	0	0	1	1	17	0	19.0281	0	Dataset1
29236	女	0	0	1	2	3	0	0	0	0	6	18	16	12	19.1485	0	Dataset1
29319	女	0	0	1	2	3	2	0	0	0	10	19	17	9	18.8693	1	Dataset1
29474	女	0	0	1	1	3	0	0	0	1	2	0	21	0	19.1485	0	Dataset1
29509	女	0	0	1	2	3	0	0	0	0	3	10	17	1	18.9788	0	Dataset1
8306	女	0	0	1	2	3	0	0	0	0	5	35	20	18	21.2621	0	Dataset1
29010	男	0	0	0	2	3	0	0	0	0	7	12	17	0	19.1485	0	Dataset1
28246	男	0	0	1	1	3	0	0	0	1	6	9	17	13	18.9487	0	Dataset1
29485	女	0	0	0	1	3	0	0	0	0	3	22	22	6	19.1485	0	Dataset1
28672	男	0	0	0	2	3	0	0	0	0	2	15	18	0	18.3409	0	Dataset1
29419	女	0	0	1	3	3	2	1	0	0	12	55	13	28	19.4853	0	Dataset1
29215	男	0	0	0	2	3	0	0	1	2	2	17	20	7	19.3758	0	Dataset1
28887	女	0	0	0	1	4	0	0	0	0	0	2	22	2	18.4175	0	Dataset1
28939	男	0	0	0	1	1	0	0	0	0	1	9	17	0	18.8775	0	Dataset1
29186	女	0	0	1	2	3	0	0	0	1	4	13	12	6	18.7242	1	Dataset1
28821	女	0	0	0	1	3	2	1	0	0	4	15	17	20	19.3812	0	Dataset1
29334	女	0	0	1	1	3	0	0	0	0	7	21	19	2	20.011	1	Dataset1
29167	女	0	0	0	1	3	0	0	0	0	3	13	17	1	19.0938	0	Dataset1
29101	女	0	0	0	2	3	0	0	0	0	4	21	21	4	18.4066	0	Dataset1
29316	男	0	0	0	2	2	0	1	1	2	5	43	12	9	18.3929	1	Dataset1
29317	男	0	0	0	2	3	0	0	0	0	4	20	21	2	19.3265	0	Dataset1
29059	女	0	0	0	1	2	0	0	0	1	0	6	19	2	19.384	0	Dataset1
29306	女	0	0	0	1	3	2	0	0	0	2	42	20	8	18.6475	0	Dataset1
29346	女	0	0	0	2	3	0	1	0	0	5	39	21	7	19.3977	0	Dataset1
29322	女	0	0	0	1	3	0	0	0	0	2	4	21	5	19.0883	0	Dataset1
29331	女	0	0	0	2	3	0	0	0	0	0	12	17	3	19.77	0	Dataset1
29226	女	0	0	1	1	2	0	1	0	0	3	3	9	10	18.2943	0	Dataset1
28688	男	0	0	1	1	2	0	0	0	0	6	11	16	1	19.3155	0	Dataset1
17448	男	0	0	1	3	1	2	1	1	2	11	60	19	23	20.6078	2	Dataset1
28302	女	0	0	0	3	3	0	0	0	1	5	22	21	6	18.3628	0	Dataset1
28898	男	0	0	0	1	4	0	0	0	0	1	14	20	1	21.3443	0	Dataset1
29314	男	0	0	0	2	2	0	1	0	3	3	17	14	9	19.05	0	Dataset1
28404	女	0	0	1	1	3	0	0	0	0	6	4	10	1	19.1485	1	Dataset1
28248	男	0	0	0	1	3	0	1	0	3	2	30	23	17	19.1485	0	Dataset1
28676	女	0	0	0	2	4	0	0	0	0	1	9	21	1	19.1485	0	Dataset1
29329	男	0	0	0	1	2	0	0	0	0	2	4	16	2	18.3053	0	Dataset1
28860	男	0	0	0	2	3	0	0	0	0	0	14	24	0	20.0958	0	Dataset1
27744	女	0	0	0	1	3	0	0	0	1	2	1	17	1	19.6742	0	Dataset1
28406	女	0	0	0	1	3	0	0	0	0	0	4	24	0	20.2519	0	Dataset1
29172	女	0	0	0	1	2	0	0	0	3	4	7	16	1	19.6605	0	Dataset1
10562	女	1	1	1	1	2	2	1	0	7	11	18	12	19	21.7331	1	Dataset1
5980	女	0	0	1	1	2	0	1	0	1	8	36	16	15	20.731	1	Dataset1
29022	女	0	0	0	1	3	0	0	0	0	1	10	19	0	19.1485	0	Dataset1
29332	女	0	1	0	1	3	0	0	0	6	4	19	20	9	19.8604	0	Dataset1
28403	男	0	0	1	1	2	0	0	0	1	4	0	19	0	18.5161	1	Dataset1
8796	男	1	0	1	1	2	2	1	1	2	11	33	16	22	20.7146	1	Dataset1
28829	女	0	0	1	1	3	2	0	0	1	10	29	18	17	19.3073	0	Dataset1
27905	女	0	0	1	1	2	0	0	0	3	8	4	13	6	18.705	1	Dataset1
28616	女	0	0	0	1	2	0	0	0	0	4	0	13	0	18.9185	0	Dataset1
29061	女	0	0	0	2	3	0	0	1	0	8	31	19	14	19.0609	0	Dataset1
28813	男	0	0	0	2	3	0	0	0	0	0	7	23	0	20.1807	0	Dataset1
29348	女	0	0	0	1	3	0	1	0	0	1	19	16	17	19.4689	0	Dataset1
29302	女	0	0	0	1	1	1	1	0	1	6	29	13	7	20.2272	0	Dataset1
17482	女	0	0	1	1	3	0	1	0	2	11	54	17	19	20.2984	1	Dataset1
29181	男	0	0	0	1	3	0	0	0	0	1	2	21	5	19.5318	0	Dataset1
29216	女	0	0	0	1	3	0	0	0	0	2	12	21	0	19.3238	0	Dataset1
29233	男	1	0	0	2	3	0	0	0	2	7	26	21	5	19.1485	0	Dataset1
28105	女	1	0	1	1	3	0	0	0	1	9	5	22	0	19.1485	0	Dataset1
27456	男	0	0	0	2	2	0	0	0	0	3	6	16	0	19.885	1	Dataset1
29240	男	0	0	0	3	3	0	0	0	0	1	53	15	1	19.1485	0	Dataset1
27006	男	0	0	0	1	3	0	0	0	0	0	21	22	0	19.822	0	Dataset1
29120	女	0	0	0	2	3	0	0	0	3	1	33	16	8	20.5394	0	Dataset1
29232	女	0	0	0	1	4	0	0	0	0	2	16	19	1	17.8015	0	Dataset1
27085	男	0	0	1	2	3	0	0	0	1	4	32	14	9	20.2574	0	Dataset1
28367	女	0	0	0	1	3	0	0	0	0	0	0	20	0	18.6694	0	Dataset1
7906	男	0	0	1	1	1	0	1	0	2	11	10	16	18	20.7666	1	Dataset1
29467	女	0	0	1	2	4	0	1	0	0	7	20	23	2	18.6037	1	Dataset1
7656	男	0	0	1	1	2	1	0	0	1	3	4	6	19	23.4004	1	Dataset1
28751	男	0	0	0	2	3	0	1	0	0	2	33	18	6	19.4853	0	Dataset1
29498	女	0	0	0	2	2	0	0	0	0	1	11	9	0	21.0322	0	Dataset1
29345	女	0	0	0	1	1	0	0	0	0	3	11	17	0	19.0965	0	Dataset1
26951	女	0	0	0	1	2	0	0	0	0	3	6	17	2	19.9918	0	Dataset1
29492	女	0	0	0	1	3	0	0	0	0	2	3	20	2	19.1923	0	Dataset1
28856	女	0	0	1	1	3	0	0	0	0	3	4	18	3	18.6338	0	Dataset1
29267	女	0	0	0	2	4	0	0	0	1	6	10	10	10	18.6968	0	Dataset1
29456	女	0	0	1	3	2	2	0	1	2	3	18	13	17	18.7406	0	Dataset1
8818	女	0	0	1	1	3	0	1	0	1	10	40	15	16	20.5311	1	Dataset1
29447	女	0	0	0	1	2	0	0	0	0	0	2	19	0	18.1875	0	Dataset1
29107	女	0	0	0	1	4	0	0	0	0	1	14	22	0	18.2341	0	Dataset1
29220	女	0	0	0	1	2	0	0	0	0	2	18	20	9	18.883	0	Dataset1
29501	女	0	0	1	2	2	0	1	0	1	5	25	24	14	19.1485	0	Dataset1
29487	女	0	0	0	2	3	0	1	0	0	7	34	17	14	18.4887	0	Dataset1
7245	女	0	0	1	2	2	2	1	1	1	9	48	12	17	22.7461	1	Dataset1
29310	男	0	0	0	1	3	0	0	0	1	2	13	22	2	19.1485	0	Dataset1
28668	女	0	0	0	1	1	2	1	1	1	7	19	7	17	20.0903	2	Dataset1
26713	女	0	0	0	3	3	0	1	1	1	3	52	19	12	19.0801	1	Dataset1
6685	男	1	1	1	2	1	0	1	0	15	12	9	1	2	22.6612	1	Dataset1
27033	女	0	0	1	2	3	0	0	1	0	12	42	23	14	19.6934	1	Dataset1
28552	女	0	0	0	1	3	0	1	0	0	4	11	21	6	19.1485	0	Dataset1
7948	女	0	1	1	4	4	2	2	1	7	5	39	20	13	21.2621	2	Dataset1
28642	男	0	0	0	2	3	0	0	0	0	4	1	17	9	19.1485	0	Dataset1
28268	女	0	0	0	1	2	0	1	0	1	7	23	13	10	19.1485	0	Dataset1
27510	男	0	0	1	2	3	0	0	0	0	3	35	18	1	18.5435	0	Dataset1
28032	女	0	0	1	2	3	2	1	0	0	8	19	16	12	19.1403	1	Dataset1
28846	女	0	0	1	2	3	2	1	0	0	7	22	13	11	19.1485	1	Dataset1
29273	男	0	0	0	1	2	0	0	0	0	0	0	13	1	19.1485	2	Dataset1
29049	女	0	1	0	1	2	0	1	1	7	1	29	16	3	21.6728	0	Dataset1
28894	女	0	0	0	2	4	0	0	0	0	4	14	23	1	19.1485	0	Dataset1
28691	女	0	0	0	1	3	0	0	0	0	0	2	24	6	19.1485	0	Dataset1
29373	男	0	0	0	1	3	0	0	0	0	2	7	24	5	18.9377	0	Dataset1
29122	女	0	0	1	2	3	0	0	0	0	5	7	18	8	19.1431	0	Dataset1
29442	女	0	0	0	1	3	0	0	0	0	0	5	21	2	19.1458	0	Dataset1
27592	女	0	0	0	1	3	0	0	0	0	0	2	18	0	18.7242	0	Dataset1
27776	女	0	0	0	1	3	0	0	0	0	1	11	18	0	19.0965	0	Dataset1
26494	女	0	0	0	1	3	0	0	0	1	5	30	21	1	19.1485	0	Dataset1
29423	女	0	0	1	1	3	2	1	0	0	12	17	19	10	18.4969	0	Dataset1
28983	女	0	0	0	1	4	0	0	0	0	0	18	23	0	20.5366	0	Dataset1
29472	女	0	0	0	3	3	0	0	0	0	3	31	22	14	19.1485	0	Dataset1
29134	男	0	0	1	1	2	1	1	0	2	7	18	18	15	19.1458	1	Dataset1
17770	女	0	0	1	1	3	0	0	0	0	10	36	16	16	20.0958	1	Dataset1
29429	女	0	0	0	2	2	0	0	0	0	2	10	18	3	19.6961	0	Dataset1
28850	男	0	0	0	2	3	0	0	0	0	0	31	15	1	19.1622	0	Dataset1
8637	男	0	0	1	3	1	0	1	0	0	7	33	9	14	21.024	1	Dataset1
29421	男	0	0	0	2	3	0	0	0	0	3	43	22	3	19.1485	0	Dataset1
6755	女	0	0	0	2	2	2	1	0	0	3	35	17	23	21.6591	0	Dataset1
28447	女	0	0	0	1	3	0	0	0	0	1	16	19	2	19.1485	0	Dataset1
29028	男	0	0	0	1	4	0	1	0	0	0	1	21	3	18.9185	0	Dataset1
6483	女	0	0	1	2	3	0	1	0	0	11	21	14	19	21.4565	0	Dataset1
28955	男	0	0	0	1	3	0	0	0	0	0	0	22	0	18.1355	0	Dataset1
29453	男	0	0	0	1	3	0	0	0	0	5	6	23	1	19.321	0	Dataset1
28418	男	0	0	0	1	3	0	0	0	0	0	0	19	0	21.8836	0	Dataset1
27294	女	0	0	0	1	3	0	0	0	0	3	18	20	0	19.0965	0	Dataset1
29418	男	0	0	0	1	3	0	0	0	0	0	6	23	2	19.1485	0	Dataset1
29228	女	0	0	0	1	3	0	0	0	0	3	18	20	0	20.2984	0	Dataset1
29279	男	0	0	0	1	1	0	0	0	1	0	6	12	7	19.1485	2	Dataset1
29476	女	0	0	0	1	3	0	0	0	0	0	15	19	0	19.0007	0	Dataset1
26446	女	1	0	0	1	2	0	0	0	2	4	16	5	15	19.2225	1	Dataset1
28663	女	0	0	0	2	3	0	0	0	1	2	27	18	2	19.1485	0	Dataset1
29263	女	0	0	0	1	3	0	1	0	1	5	2	20	3	19.5455	0	Dataset1
29209	女	0	0	0	1	3	0	0	0	1	3	16	15	7	19.1485	0	Dataset1
29480	女	0	0	0	2	3	0	0	0	0	2	13	15	3	20.345	0	Dataset1
28436	女	0	0	0	1	3	0	0	0	1	5	23	16	4	18.5188	0	Dataset1
28180	女	0	0	0	1	3	0	0	0	0	2	10	24	2	19.0773	0	Dataset1
29133	女	0	0	0	2	2	0	0	1	1	4	12	16	7	18.872	0	Dataset1
29207	女	0	0	0	1	3	0	0	0	1	3	3	17	4	19.1348	0	Dataset1
29426	女	0	0	0	1	3	0	0	0	0	1	3	15	7	20.1232	0	Dataset1
29315	女	0	0	1	1	3	0	0	0	0	3	13	24	1	19.8713	0	Dataset1
29475	女	0	0	0	1	3	0	1	0	0	2	1	16	6	18.9021	0	Dataset1
28033	女	0	0	0	1	3	0	0	0	0	3	13	15	5	18.7187	0	Dataset1
28242	女	0	0	0	1	3	0	0	0	0	2	1	22	3	18.3299	0	Dataset1
28742	女	0	0	0	1	3	0	0	0	1	3	10	22	6	21.7467	0	Dataset1
29505	男	0	0	1	1	3	0	0	0	1	10	19	18	3	18.6201	0	Dataset1
29500	女	0	0	0	1	3	0	0	0	0	1	14	24	0	19.1978	0	Dataset1
27957	男	0	0	0	3	2	0	1	0	0	3	40	15	9	18.4257	0	Dataset1
29008	女	0	0	0	1	3	0	0	0	3	1	21	20	0	19.1485	0	Dataset1
29214	女	0	0	0	2	3	0	0	0	1	0	24	17	7	19.3676	0	Dataset1
28544	男	0	0	0	2	3	0	0	0	0	2	28	14	3	20.6571	0	Dataset1
28972	女	1	0	1	3	3	1	1	1	2	11	31	13	22	18.9624	0	Dataset1
17585	女	0	0	1	1	4	2	1	0	0	8	24	18	13	20.8789	1	Dataset1
28140	男	1	0	0	1	1	0	0	0	3	2	2	14	8	19.1485	0	Dataset1
29272	男	0	0	0	1	4	0	0	0	0	1	6	27	0	19.4689	2	Dataset1
8537	女	1	1	1	3	2	1	1	1	9	11	11	12	24	21.3169	1	Dataset1
29280	女	0	0	0	1	3	0	0	0	0	2	2	15	13	19.4278	1	Dataset1
29257	女	0	0	0	1	3	0	0	0	0	0	9	21	4	19.1485	0	Dataset1
29425	男	0	0	0	1	2	0	0	0	1	3	8	15	1	18.9021	0	Dataset1
29435	女	0	0	0	1	2	0	0	0	1	2	4	12	4	19.2526	0	Dataset1
29515	女	0	0	0	1	3	0	0	0	0	0	10	22	0	18.9021	0	Dataset1
29115	女	0	0	0	1	3	0	0	0	0	0	12	18	6	20.2218	0	Dataset1
17558	女	0	0	1	3	3	0	1	1	1	9	45	15	14	21.2895	1	Dataset1
28318	男	0	0	0	2	2	1	0	1	0	4	14	10	20	18.245	2	Dataset1
29042	女	0	0	1	1	3	0	0	0	2	6	23	23	8	19.1485	0	Dataset1
27564	女	0	0	1	2	1	0	0	0	0	6	6	9	3	19.2635	0	Dataset1
28643	男	0	0	0	1	2	0	0	0	0	1	19	10	2	19.1485	1	Dataset1
25226	女	0	0	0	1	3	0	0	0	0	1	23	17	3	21.4538	0	Dataset1
28644	女	0	0	0	1	2	0	0	0	0	3	7	17	1	19.8275	0	Dataset1
23687	男	0	0	0	1	2	0	0	0	0	0	1	21	0	18.2204	0	Dataset1
28609	女	0	0	0	1	3	0	0	0	1	2	4	17	0	18.3929	0	Dataset1
27504	男	0	0	0	2	3	2	0	1	1	2	27	14	7	18.9541	2	Dataset1
28843	男	0	0	0	2	2	0	1	0	0	3	44	15	9	19.1485	0	Dataset1
28392	女	0	0	0	2	3	0	0	0	0	5	31	20	4	20.9555	0	Dataset1
29299	女	0	0	0	2	4	0	0	0	1	2	26	22	1	18.3436	0	Dataset1
29031	男	0	0	0	1	3	2	1	1	1	8	30	20	21	19.4661	0	Dataset1
29135	女	0	0	1	1	3	0	0	0	0	3	12	20	8	19.1485	0	Dataset1
29465	女	0	0	0	1	4	0	0	0	1	0	9	27	0	19.1485	0	Dataset1
28157	女	0	0	0	1	3	0	0	0	0	1	19	19	0	18.8665	0	Dataset1
25907	女	0	0	0	2	3	0	0	0	0	1	20	19	5	19.2936	0	Dataset1
29142	女	0	0	0	1	2	0	0	0	0	4	3	14	3	18.1602	1	Dataset1
6721	男	0	0	1	2	3	2	1	0	0	12	22	19	24	21.2621	1	Dataset1
28399	女	0	0	0	2	3	0	0	0	0	3	6	16	3	19.2471	0	Dataset1
29491	女	0	0	0	1	3	0	0	0	0	0	8	17	0	18.5681	1	Dataset1
29266	女	0	0	0	2	3	0	0	0	0	5	50	15	5	19.1485	0	Dataset1
27654	女	0	0	0	1	3	0	0	1	0	4	7	17	9	19.7645	0	Dataset1
29213	女	0	0	0	1	4	0	0	0	0	0	0	19	0	18.4832	0	Dataset1
29335	女	0	0	1	3	3	2	1	0	0	11	66	16	17	19.4579	0	Dataset1
27898	女	0	0	0	1	3	2	1	0	2	4	14	17	15	19.0472	1	Dataset1
28365	男	0	0	1	2	2	0	1	0	0	6	31	13	17	19.206	2	Dataset1
29395	女	0	0	1	1	3	0	0	0	0	8	24	16	3	18.8638	0	Dataset1
29246	男	0	0	1	2	2	0	0	0	0	5	14	24	9	18.8063	0	Dataset1
29018	女	0	0	0	1	3	0	0	0	0	3	24	20	2	19.1376	0	Dataset1
28906	男	0	0	0	1	4	0	0	0	1	0	5	22	0	19.2252	0	Dataset1
29198	女	0	0	0	1	3	0	0	0	0	0	8	23	1	18.3956	0	Dataset1
29095	女	0	0	0	1	3	0	0	0	0	0	0	20	5	19.8357	0	Dataset1
29489	女	0	0	1	2	3	0	0	0	0	10	14	18	1	18.9897	0	Dataset1
28093	女	0	0	0	1	3	0	0	0	0	0	3	18	0	19.1485	0	Dataset1
29448	女	0	0	0	2	2	0	0	0	1	0	17	15	2	19.3648	0	Dataset1
7013	男	0	1	1	3	3	1	1	1	7	11	35	17	28	21.2621	2	Dataset1
29399	女	0	0	0	1	3	0	0	0	0	1	4	20	2	19.1485	0	Dataset1
29454	男	0	0	1	2	3	0	0	0	1	9	13	18	9	19.1732	0	Dataset1
29011	女	0	0	0	1	3	0	0	0	0	0	0	22	3	18.7351	0	Dataset1
29155	女	0	0	0	2	3	0	0	0	0	1	13	22	0	19.1485	0	Dataset1
29189	男	0	0	0	1	2	0	0	0	0	2	0	10	8	19.1485	0	Dataset1
29261	男	0	0	0	1	3	0	0	0	0	3	30	21	3	19.1485	1	Dataset1
29490	女	0	0	1	2	3	0	0	1	0	2	9	21	1	18.9131	0	Dataset1
27874	男	0	0	0	1	3	0	0	0	0	1	9	17	10	19.0965	0	Dataset1
29253	女	1	0	1	3	3	0	0	0	1	4	9	18	7	19.0472	1	Dataset1
29452	女	0	0	1	1	2	3	1	0	0	10	12	14	23	19.0801	0	Dataset1
29401	男	0	0	1	2	3	0	0	1	0	10	27	16	9	19.154	0	Dataset1
29461	女	0	0	0	1	4	0	0	0	0	2	4	24	0	19.6496	0	Dataset1
28453	女	0	0	0	1	3	0	0	0	0	2	9	24	5	18.8747	0	Dataset1
28803	女	0	0	0	1	3	0	0	0	0	1	16	16	6	18.2752	0	Dataset1
29045	女	0	0	0	1	3	0	0	0	2	3	6	21	2	19.1622	0	Dataset1
17116	男	0	0	0	3	3	1	1	1	1	9	50	18	16	20.2984	0	Dataset1
29138	女	0	0	0	1	3	0	0	0	0	0	3	22	0	18.2341	0	Dataset1
28826	男	0	0	0	1	3	0	0	0	0	0	10	17	6	19.1485	0	Dataset1
28519	女	0	0	0	1	2	0	0	0	0	1	5	15	0	18.6174	0	Dataset1
29450	男	0	0	0	2	3	0	0	0	0	5	14	19	9	19.3101	0	Dataset1
29444	男	0	0	0	2	3	0	0	0	0	1	25	21	3	18.527	0	Dataset1
29370	女	0	0	0	2	3	0	0	0	0	8	16	18	4	19.1485	0	Dataset1
27808	女	0	0	0	1	3	0	0	0	0	1	7	21	3	18.924	0	Dataset1
17451	男	0	0	1	4	2	0	1	0	4	4	49	12	15	19.6797	0	Dataset1
29351	男	0	0	0	1	2	0	0	0	0	2	2	15	0	19.1458	0	Dataset1
28937	女	0	0	0	1	3	0	0	0	0	4	13	22	2	19.1485	0	Dataset1
28010	女	0	0	1	2	3	0	1	0	0	6	24	17	13	19.1485	1	Dataset1
29430	女	0	0	0	1	3	0	0	0	0	1	3	20	2	19.1485	0	Dataset1
29446	女	0	0	0	1	3	0	0	0	0	1	5	23	0	19.1485	0	Dataset1
28655	女	0	0	0	2	4	0	0	0	0	1	9	21	1	19.4716	0	Dataset1
29494	女	0	0	0	1	3	0	0	0	0	1	8	18	6	19.4716	0	Dataset1
17540	女	0	0	1	2	3	0	0	1	0	11	29	20	15	20.4216	2	Dataset1
25418	女	0	0	1	1	4	0	0	0	0	5	6	22	14	19.2471	0	Dataset1
27073	男	0	0	0	1	3	0	0	0	1	6	8	14	7	19.1485	0	Dataset1
29270	女	0	0	0	2	3	0	0	0	0	0	11	24	1	18.3792	0	Dataset1
28293	女	0	0	0	1	3	0	0	0	0	0	4	17	3	19.1348	0	Dataset1
29223	女	0	0	1	1	2	0	0	1	0	7	8	13	11	19.1485	0	Dataset1
29460	女	0	0	0	2	3	0	0	0	0	0	36	22	0	19.1485	0	Dataset1
29469	女	0	0	1	1	3	0	1	0	1	6	18	13	15	18.3792	0	Dataset1
29255	女	0	0	1	1	3	0	0	0	0	7	17	18	11	19.4278	0	Dataset1
28878	男	0	0	0	2	3	0	0	0	0	0	19	24	0	18.5489	0	Dataset1
28667	女	0	0	0	1	3	0	1	0	0	1	1	21	5	18.7543	0	Dataset1
29516	男	0	0	0	1	3	0	0	0	0	1	15	20	4	19.1732	0	Dataset1
29281	女	0	0	0	1	4	0	0	0	0	4	1	21	3	19.1485	0	Dataset1
26029	女	0	0	1	1	4	0	1	1	0	11	14	18	13	18.8474	1	Dataset1
26758	女	0	0	0	1	3	0	0	0	0	0	3	20	0	19.4962	0	Dataset1
28979	男	0	0	0	2	2	0	0	0	1	7	18	16	4	19.5127	0	Dataset1
8698	女	0	0	1	4	3	1	1	1	1	12	31	15	16	20.4764	1	Dataset1
29197	女	0	0	0	1	3	0	0	0	0	1	9	20	0	19.1485	0	Dataset1
29488	男	0	0	0	1	2	0	0	0	1	2	1	13	0	18.4641	0	Dataset1
29221	男	0	0	0	1	3	0	0	0	0	2	1	25	0	19.4524	0	Dataset1
28818	女	0	0	1	2	2	0	0	1	1	11	30	15	18	20.0903	3	Dataset1
29247	女	0	0	0	1	4	0	0	0	0	1	28	21	0	18.653	0	Dataset1
29468	女	0	0	0	1	4	0	0	0	0	3	7	23	0	19.1485	0	Dataset1
29093	女	0	0	1	2	3	0	1	1	0	12	43	17	21	18.7652	0	Dataset1
29378	男	0	1	1	2	1	0	1	1	6	10	28	8	21	18.3518	1	Dataset1
29503	男	0	0	0	1	3	0	0	0	0	1	22	20	0	19.2772	0	Dataset1
29459	女	0	0	0	1	3	0	0	0	0	0	0	18	3	19.1485	0	Dataset1
29496	女	0	0	0	1	2	0	0	0	0	0	13	15	0	19.0007	0	Dataset1
29333	男	0	0	0	1	3	0	0	0	0	2	12	18	0	19.1485	0	Dataset1
29082	女	0	0	0	2	4	0	1	1	1	7	20	17	21	17.7495	1	Dataset1
28911	女	0	0	0	1	3	0	0	1	0	2	1	16	7	19.2334	1	Dataset1
5083	女	0	0	1	3	4	0	1	1	0	11	27	18	21	20.8789	1	Dataset1
28252	男	0	0	0	2	3	0	0	0	0	0	25	17	2	19.1622	0	Dataset1
29305	女	0	0	0	1	3	0	0	0	0	1	11	20	5	18.078	0	Dataset1
29390	男	0	0	1	2	3	0	0	0	0	10	54	22	8	18.6283	0	Dataset1
28807	女	0	0	0	1	3	0	0	0	0	0	6	19	2	19.5893	0	Dataset1
29051	女	0	0	0	3	2	0	0	0	0	5	13	12	2	19.1485	0	Dataset1
29341	女	0	0	0	2	3	0	0	0	0	2	28	20	1	19.2471	0	Dataset1
29078	女	0	0	0	1	1	0	0	0	0	5	9	15	5	18.9952	0	Dataset1
29396	女	0	0	0	2	3	0	0	0	0	3	12	16	2	18.1903	0	Dataset1
29108	男	0	0	0	2	3	0	0	0	2	2	10	18	3	19.5154	0	Dataset1
29139	女	0	0	0	2	2	0	0	0	0	0	10	14	0	18.2012	1	Dataset1
27869	男	0	0	0	1	3	0	0	0	0	0	8	18	2	19.102	1	Dataset1
29360	男	0	0	0	1	2	0	0	0	0	2	1	17	1	19.1485	0	Dataset1
29339	女	0	0	0	2	3	0	0	0	0	2	7	19	2	19.1047	0	Dataset1
28828	女	0	0	0	2	1	0	0	0	1	5	1	14	6	19.1978	0	Dataset1
29375	女	0	0	0	1	2	0	0	1	0	5	29	16	6	19.1485	0	Dataset1
29307	女	0	0	0	2	4	2	0	0	0	3	24	21	15	19.1485	0	Dataset1
29324	女	0	0	0	1	4	0	0	0	0	1	3	22	0	19.1485	0	Dataset1
29344	女	0	0	0	1	3	0	0	0	0	1	10	16	5	18.872	0	Dataset1
29338	女	0	0	0	2	3	0	0	0	0	1	42	15	0	19.1485	0	Dataset1
29325	女	0	0	0	2	3	0	0	0	0	1	11	19	0	18.9569	0	Dataset1
29400	女	0	0	0	1	4	0	0	0	0	0	0	25	1	19.0746	1	Dataset1
17508	女	1	1	1	3	2	1	2	1	7	11	38	13	29	20.2984	1	Dataset1
29126	男	0	0	0	2	3	0	0	0	0	0	13	21	3	19.2936	2	Dataset1
28820	男	1	1	0	1	2	0	1	1	7	7	36	21	14	18.6229	0	Dataset1
17428	女	0	0	1	1	4	0	0	0	0	6	16	26	1	20.2437	0	Dataset1
28348	男	0	0	1	2	3	0	0	0	0	8	22	20	7	19.1485	0	Dataset1
27840	女	0	0	0	1	3	0	0	0	0	1	8	15	6	19.1485	0	Dataset1
29296	女	0	0	0	1	4	0	0	0	2	0	2	24	0	19.1485	0	Dataset1
29382	女	0	0	0	1	2	0	0	0	0	0	0	22	0	18.3628	0	Dataset1
29036	女	0	0	1	1	3	0	0	0	0	7	2	18	6	19.1485	0	Dataset1
23211	男	0	0	0	2	3	0	0	0	0	0	6	22	1	19.0226	0	Dataset1
27739	女	0	0	0	1	3	0	0	0	0	2	41	24	1	18.5517	0	Dataset1
29392	女	0	0	0	1	3	0	0	0	2	2	6	18	3	19.1485	0	Dataset1
27904	女	0	0	0	2	3	0	0	0	0	0	31	20	1	18.976	0	Dataset1
29354	男	0	0	1	2	2	0	1	1	0	10	26	12	20	19.2471	1	Dataset1
29359	女	0	0	0	2	2	0	0	0	4	4	24	16	4	19.1485	0	Dataset1
29019	女	0	0	1	2	3	0	0	0	3	5	16	15	3	19.2361	0	Dataset1
29479	男	0	0	0	1	2	0	0	0	0	3	31	14	1	19.1677	0	Dataset1
28650	女	0	0	0	1	1	0	0	0	2	2	16	9	13	18.5626	1	Dataset1
17355	女	0	1	1	3	3	0	2	1	8	4	28	18	28	21.5031	2	Dataset1
27989	女	0	0	0	1	3	0	1	0	0	1	1	17	8	19.6769	0	Dataset1
8391	女	0	0	0	2	3	2	1	0	0	6	40	16	16	20.7858	1	Dataset1
10346	女	0	0	1	3	3	1	1	1	0	10	53	15	24	22.1875	2	Dataset1
5143	男	0	0	0	1	2	1	1	2	1	6	4	11	29	21.0349	1	Dataset1
28969	女	0	0	0	1	4	0	1	0	1	5	43	18	12	19.1485	0	Dataset1
29391	女	0	0	0	2	4	0	0	0	0	2	9	24	0	19.0773	0	Dataset1
8130	男	0	0	0	3	3	0	1	1	0	9	55	17	17	21.4374	2	Dataset1
23673	女	0	0	1	3	2	0	0	0	0	11	48	19	15	19.154	1	Dataset1
29050	女	0	0	1	1	3	0	0	0	0	4	7	18	0	19.1485	2	Dataset1
29278	女	0	0	1	1	3	0	1	0	0	7	16	19	3	19.6687	0	Dataset1
29158	男	0	0	0	2	3	0	0	0	0	5	16	20	1	19.1485	0	Dataset1
28574	女	0	0	0	2	2	0	0	0	1	4	16	14	2	19.4387	0	Dataset1
29260	女	0	0	0	1	3	0	1	0	0	4	12	21	6	18.9541	0	Dataset1
23703	男	0	0	0	2	4	2	1	1	0	0	23	27	23	19.154	0	Dataset1
28808	女	0	0	1	2	3	0	0	1	3	10	41	13	13	18.8063	0	Dataset1
29493	男	0	0	0	3	1	0	0	0	0	5	32	13	0	19.3347	0	Dataset1
29259	女	0	0	0	1	3	0	0	0	0	3	24	15	11	19.6249	0	Dataset1
27782	男	0	0	0	2	4	0	0	0	0	8	32	19	8	19.5181	0	Dataset1
29251	女	0	0	0	3	3	0	0	0	0	3	37	18	8	20.1314	0	Dataset1
29387	男	0	0	0	1	2	0	0	0	2	0	16	14	3	19.1184	0	Dataset1
28814	女	0	0	1	2	3	0	0	1	0	6	13	18	4	19.3703	0	Dataset1
27948	女	0	0	0	1	3	0	0	0	0	0	0	16	0	18.3737	0	Dataset1
29457	男	0	0	1	2	1	0	2	0	0	10	15	10	17	19.1485	0	Dataset1
29499	男	0	0	0	1	3	0	0	0	0	1	3	17	0	19.3511	0	Dataset1
29146	女	0	0	1	1	2	2	2	0	0	9	19	13	25	19.1129	0	Dataset1
29355	男	0	0	0	1	4	0	0	0	1	2	3	22	3	19.1485	0	Dataset1
26316	女	0	0	0	1	4	0	0	0	0	3	24	22	2	18.538	0	Dataset1
27297	女	0	0	0	2	3	0	0	1	1	2	39	19	4	18.8994	1	Dataset1
29274	女	0	0	1	1	3	0	0	0	0	5	3	25	0	19.1485	1	Dataset1
29449	女	0	0	1	1	3	0	0	0	0	4	0	21	0	19.1485	2	Dataset1
28266	女	0	0	1	1	3	0	1	0	0	11	10	18	14	19.1485	1	Dataset1
16000	男	0	0	1	3	2	2	0	0	1	6	17	10	16	20.3012	0	Dataset1
29511	女	0	0	0	2	3	1	1	0	0	5	23	17	4	18.705	0	Dataset1
29458	女	0	0	1	1	2	0	0	1	0	7	14	14	24	18.5736	1	Dataset1
29225	女	0	0	1	1	2	0	0	0	1	5	12	13	8	18.2177	1	Dataset1
27424	男	0	0	0	1	3	0	0	0	0	0	5	21	3	18.9514	0	Dataset1
16094	男	0	0	0	1	3	2	2	2	1	1	13	16	40	20.3012	1	Dataset1
29046	女	0	0	0	2	3	0	0	0	0	5	26	18	4	18.987	0	Dataset1
5000	男	0	0	1	2	3	1	1	0	0	10	43	20	23	21.796	0	Dataset1
28811	男	0	1	1	2	3	0	0	0	7	11	17	21	6	17.9959	0	Dataset1
29451	女	0	0	1	1	4	0	0	0	0	1	7	20	1	18.8966	0	Dataset1
29237	女	0	0	0	1	3	0	0	0	0	3	8	17	0	18.9405	0	Dataset1
29277	女	0	0	1	3	2	1	1	0	0	7	17	12	16	18.7515	2	Dataset1
29106	男	0	0	0	1	3	0	0	0	1	8	31	16	5	18.7543	0	Dataset1
29268	男	0	0	1	2	2	1	1	0	0	5	23	17	17	19.6468	0	Dataset1
4714	女	0	0	1	1	2	2	1	0	0	8	42	14	21	21.2649	2	Dataset1
17794	女	0	0	1	2	3	1	1	0	3	12	29	16	15	20.2984	2	Dataset1
23406	男	0	0	0	1	3	0	0	0	2	3	18	20	7	19.5565	0	Dataset1
29507	女	0	0	0	1	3	0	0	0	0	2	3	21	5	18.2533	0	Dataset1
26644	女	0	0	0	2	4	0	0	0	1	11	31	14	7	18.8912	1	Dataset1
29072	女	0	0	0	1	3	0	0	0	1	0	2	19	2	19.9069	0	Dataset1
29110	男	0	0	0	5	3	0	0	0	0	3	13	15	0	19.1485	0	Dataset1
29227	女	0	0	1	3	3	0	1	0	0	8	13	18	15	19.1485	1	Dataset1
29466	女	0	0	0	1	2	0	0	0	0	0	8	10	5	18.5407	0	Dataset1
28950	女	0	0	0	1	3	0	0	0	1	8	11	21	0	19.1485	0	Dataset1
29483	女	0	0	0	1	3	0	0	0	0	2	6	20	5	18.9678	0	Dataset1
5491	男	0	0	1	2	4	1	1	1	2	12	42	25	19	21.2649	0	Dataset1
29070	女	0	0	0	1	2	0	0	0	0	3	11	17	7	18.59	0	Dataset1
28804	男	0	0	0	1	2	1	1	1	0	5	40	22	30	19.0856	0	Dataset1
29170	女	0	0	0	1	3	0	0	0	0	0	0	26	0	19.1485	0	Dataset1
29377	男	0	0	0	1	2	0	0	0	3	0	3	23	5	19.2361	0	Dataset1
27476	男	0	0	0	1	3	0	1	0	0	2	26	15	17	19.1485	1	Dataset1
29248	女	0	0	0	1	4	2	1	0	0	5	9	19	14	19.4031	0	Dataset1
29239	男	0	0	0	1	2	0	0	0	0	2	9	16	6	19.1485	0	Dataset1
29112	男	0	0	0	1	2	0	0	0	0	1	2	13	13	19.1485	0	Dataset1
8631	女	0	0	1	3	4	2	1	1	2	12	39	19	29	21.2621	1	Dataset1
25169	男	0	0	0	2	3	0	2	0	1	6	35	15	23	19.1485	0	Dataset1
29471	女	0	0	0	1	3	0	0	0	0	1	1	15	2	18.2396	0	Dataset1
29431	女	0	0	0	2	3	0	0	1	1	1	6	20	2	19.1485	0	Dataset1
6215	女	0	0	0	3	3	0	2	0	1	9	64	18	21	21.2649	0	Dataset1
27709	男	0	0	1	1	3	0	1	0	1	9	1	14	22	19.1485	2	Dataset1
[truncated: 1,715 more rows]

## Sheet: Longitudinal Cohort
number.x	Gender	GE12	GE14	EPQN2	ASLEC6	SSRS8	BDI2	BDI7	BDI9	GE	EPQN	ASLEC	SSRS	BDI	Age	SuLevel	source
25366	男	0	0	0	2	3	0	0	1	1	6	19	12	13	22.1739	0	Dataset1
17900	男	0	0	1	2	1	0	0	1	2	9	26	12	21	23.321	0	Dataset1
10920	男	0	0	1	1	2	0	0	1	1	7	34	11	17	24.2847	0	Dataset1
29117	女	0	0	0	2	3	0	2	1	1	8	25	17	18	19.5428	1	Dataset1
17554	女	0	0	1	1	4	0	1	1	1	8	38	21	14	20.6927	1	Dataset1
7017	女	1	0	1	1	3	0	2	1	2	11	24	21	17	21.6564	1	Dataset1
27108	女	0	0	0	2	3	2	1	0	0	5	30	15	19	18.4038	1	Dataset1
15758	女	0	0	1	3	3	2	1	1	0	11	28	17	31	19.5565	1	Dataset1
10167	女	0	0	1	3	3	2	1	0	0	12	24	17	20	20.5147	1	Dataset1
26899	女	0	0	1	3	2	0	1	1	0	10	35	16	21	19.1485	3	Dataset1
15931	女	0	0	1	3	3	1	3	1	1	11	36	16	35	20.3012	3	Dataset1
5364	女	0	1	1	3	3	3	1	1	7	9	37	18	33	21.2649	3	Dataset1
26675	女	0	0	1	1	4	0	0	0	0	6	25	22	10	19.165	0	Dataset1
15746	女	0	0	1	2	3	0	0	0	1	5	24	20	15	20.3176	0	Dataset1
5743	女	0	1	1	2	3	0	0	0	7	7	22	15	5	21.2786	0	Dataset1
26725	男	0	0	1	3	3	1	3	1	4	9	34	15	23	18.7379	1	Dataset1
14964	男	0	0	1	2	3	3	1	1	1	7	32	17	22	19.8932	1	Dataset1
3381	男	0	0	1	2	1	1	2	0	2	8	31	12	23	20.8569	1	Dataset1
26361	女	0	0	1	2	3	0	1	1	0	3	11	17	11	18.3354	1	Dataset1
15990	女	0	0	1	2	3	0	0	1	0	2	12	17	11	19.488	1	Dataset1
8950	女	0	0	1	2	3	0	1	1	0	6	37	16	14	20.449	1	Dataset1
26539	女	0	1	0	3	2	2	1	1	6	5	17	12	15	19.3238	2	Dataset1
14744	女	0	1	1	2	2	2	1	1	6	11	42	11	24	20.4791	2	Dataset1
5360	女	0	0	1	5	1	2	3	1	1	10	29	10	20	21.4401	2	Dataset1
26054	女	0	0	1	1	2	0	1	1	1	9	13	16	14	19.3566	1	Dataset1
15291	女	0	0	1	2	2	0	1	1	1	6	28	10	10	20.5092	1	Dataset1
4497	女	0	0	0	2	3	1	1	1	1	5	36	14	17	21.473	1	Dataset1
26533	女	0	0	1	1	3	0	1	0	1	10	34	20	21	19.1485	1	Dataset1
14696	女	0	0	1	1	4	0	1	0	0	9	41	19	20	20.3039	1	Dataset1
10124	女	0	0	1	1	4	2	1	0	0	9	40	20	17	21.2594	1	Dataset1
26527	女	0	0	0	4	3	2	1	0	2	8	18	16	17	18.6776	1	Dataset1
15137	女	0	1	1	3	3	2	1	0	8	11	17	16	25	19.8303	1	Dataset1
5088	女	0	1	1	4	3	2	1	0	8	7	15	15	19	20.794	1	Dataset1
25445	女	0	0	1	1	3	0	0	1	0	8	15	16	13	18.4914	0	Dataset1
15462	女	0	0	1	3	3	0	0	0	4	11	30	15	5	19.6441	0	Dataset1
9461	女	0	0	1	3	3	0	0	1	3	12	45	15	15	20.6051	0	Dataset1
26235	女	0	0	0	1	3	0	0	0	1	4	20	12	10	20.1506	1	Dataset1
15578	女	0	0	0	2	3	0	0	0	2	8	42	17	13	21.3032	1	Dataset1
4802	女	0	0	1	2	3	2	1	1	2	11	42	13	26	22.2669	1	Dataset1
26712	女	0	0	1	2	2	0	0	0	0	7	27	13	6	19.1485	2	Dataset1
14904	女	0	0	1	2	3	0	0	0	0	9	37	13	3	20.3039	2	Dataset1
5093	女	0	0	0	2	2	0	1	0	0	8	25	10	14	21.2649	2	Dataset1
26525	女	0	0	0	1	2	0	1	1	0	6	27	21	7	19.1102	2	Dataset1
15203	女	0	0	1	3	2	0	0	0	0	11	54	18	3	20.2628	2	Dataset1
4955	女	0	0	1	3	2	0	1	1	0	10	62	13	15	21.2266	2	Dataset1
25783	女	0	0	1	1	3	2	1	0	1	9	32	18	16	22.4942	2	Dataset1
14824	女	0	0	1	3	3	3	1	0	2	9	59	18	24	23.6468	2	Dataset1
6277	女	0	0	1	3	3	1	1	0	1	7	55	13	25	24.6078	2	Dataset1
26893	男	0	0	0	1	1	0	0	0	0	2	12	15	20	19.3539	0	Dataset1
15080	男	0	0	0	1	2	0	0	0	0	0	19	13	11	20.5065	0	Dataset1
5048	男	0	0	0	2	2	0	1	0	0	3	28	12	25	21.4702	0	Dataset1
25503	男	0	0	1	2	4	0	0	1	1	5	36	22	16	19.6003	2	Dataset1
15095	男	1	1	1	3	3	0	0	1	9	12	49	20	18	20.7529	2	Dataset1
5173	男	1	1	1	3	3	0	0	1	9	10	60	16	16	21.7166	2	Dataset1
25569	男	0	0	0	2	2	0	1	1	0	1	21	13	20	19.1485	1	Dataset1
14907	男	0	0	0	1	4	2	0	1	1	1	0	18	19	20.3039	1	Dataset1
5105	男	0	0	1	1	2	2	1	1	1	11	47	14	28	21.2649	1	Dataset1
26131	女	0	0	1	2	3	0	0	1	0	5	24	22	7	18.8392	1	Dataset1
15171	女	0	0	0	2	4	0	0	0	1	2	41	25	0	19.9918	1	Dataset1
7795	女	0	0	1	2	4	2	1	1	0	6	49	22	22	20.9528	1	Dataset1
26127	男	0	0	0	1	3	0	0	0	0	3	25	17	3	20.7556	1	Dataset1
15013	男	0	0	0	2	3	0	0	0	1	3	49	12	6	21.9083	1	Dataset1
6231	男	0	0	0	2	2	2	1	0	0	2	51	12	15	22.8693	1	Dataset1
26175	男	0	0	0	1	3	0	0	0	0	0	2	22	2	19.3429	1	Dataset1
14500	男	0	0	0	2	3	0	0	0	1	3	26	17	11	20.5065	1	Dataset1
4057	男	0	0	1	1	1	1	1	1	5	12	21	5	22	21.4593	1	Dataset1
26202	男	0	0	1	1	2	0	0	0	0	7	26	15	0	19.1485	1	Dataset1
14532	男	0	0	0	1	1	0	0	0	1	2	14	6	3	20.3121	1	Dataset1
3310	男	0	0	0	5	2	2	1	1	0	10	19	6	25	21.2676	1	Dataset1
26320	女	0	0	1	2	4	0	0	0	3	3	43	25	11	18.3436	0	Dataset1
14658	女	0	0	1	2	3	0	0	0	0	8	35	19	17	19.499	0	Dataset1
8409	女	0	0	1	2	4	0	1	0	1	12	58	23	18	20.4572	0	Dataset1
25866	男	0	0	0	1	3	0	0	0	1	0	28	18	5	18.7132	1	Dataset1
14929	男	0	0	1	1	3	2	1	1	1	4	40	18	23	19.8686	1	Dataset1
5567	男	0	0	1	3	3	2	1	1	3	4	62	20	21	20.8296	1	Dataset1
26958	男	0	0	1	1	3	0	0	0	0	5	37	24	0	18.4449	2	Dataset1
14667	男	0	0	1	1	1	0	1	0	2	8	26	12	15	19.6003	2	Dataset1
3281	男	1	0	1	3	1	2	0	0	3	12	8	11	15	20.564	2	Dataset1
27336	女	0	0	0	3	4	0	0	1	0	2	48	24	8	20	1	Dataset1
14657	女	0	0	0	3	2	0	0	0	0	2	20	25	0	21.1554	1	Dataset1
9663	女	0	0	0	3	3	0	1	1	2	4	35	21	17	22.1136	1	Dataset1
27353	女	0	0	1	2	2	2	1	0	0	12	22	11	11	19.0992	0	Dataset1
15671	女	0	0	1	2	2	0	2	0	1	11	32	16	19	20.2519	0	Dataset1
5259	女	0	0	0	2	3	0	1	0	0	11	32	12	17	21.2156	0	Dataset1
25649	女	0	0	0	1	3	0	0	1	0	6	11	22	10	19.039	0	Dataset1
15992	女	0	0	0	1	2	0	0	0	0	3	7	19	9	20.1916	0	Dataset1
5581	女	1	1	0	1	2	0	0	0	8	5	14	21	11	21.1554	0	Dataset1
23617	女	0	0	0	1	3	0	0	0	0	2	0	19	2	19.154	1	Dataset1
14723	女	0	0	1	1	3	0	0	0	0	2	0	18	0	20.3039	1	Dataset1
4959	女	0	0	1	1	4	0	1	0	1	9	15	24	14	21.2649	1	Dataset1
26830	女	0	0	1	2	2	0	1	1	3	12	60	15	19	18.8036	0	Dataset1
14710	女	1	0	1	3	3	0	1	0	3	12	57	16	18	19.9589	0	Dataset1
5929	女	0	0	1	2	3	0	1	0	2	12	31	17	15	20.9172	0	Dataset1
25966	男	0	0	1	2	2	1	3	1	1	4	34	11	20	19.0281	2	Dataset1
15051	男	0	1	1	1	2	0	1	0	7	6	14	11	13	20.1807	2	Dataset1
4694	男	0	1	1	2	1	1	2	1	6	4	18	10	25	21.1444	2	Dataset1
26113	女	0	0	1	4	3	0	1	1	1	9	69	17	19	19.1485	0	Dataset1
15074	女	0	0	1	1	3	2	0	0	2	6	25	21	15	20.3012	0	Dataset1
6057	女	0	1	1	3	3	2	0	0	6	9	54	18	19	21.2621	0	Dataset1
26573	女	0	0	1	2	2	0	1	0	2	9	11	9	5	18.6119	1	Dataset1
14674	女	0	0	1	2	3	2	2	0	2	9	19	13	11	19.7673	1	Dataset1
6323	女	0	0	1	2	4	2	1	1	1	11	37	12	15	20.7255	1	Dataset1
26099	女	0	0	1	1	3	0	0	0	3	5	21	17	6	21.1307	2	Dataset1
15317	女	0	0	0	1	2	0	0	0	4	1	9	12	6	22.2834	2	Dataset1
3970	女	0	0	1	2	1	0	1	0	1	12	54	8	14	23.2471	2	Dataset1
27132	女	0	0	1	1	3	2	0	0	0	4	17	19	7	19.2197	1	Dataset1
15290	女	0	0	1	2	2	2	1	0	0	4	32	15	9	20.3723	1	Dataset1
10883	女	0	0	1	2	4	2	1	0	1	10	45	20	14	21.3306	1	Dataset1
26753	女	0	0	0	3	3	0	1	1	0	6	55	14	14	18.6064	1	Dataset1
15255	女	0	0	1	3	2	2	1	1	0	5	46	11	25	19.7591	1	Dataset1
6760	女	0	0	1	3	2	1	1	0	0	7	58	12	17	20.7201	1	Dataset1
26661	女	0	0	0	3	4	2	1	1	0	7	18	17	18	18.4805	1	Dataset1
15273	女	0	0	0	3	3	2	1	0	0	9	23	18	17	19.6331	1	Dataset1
10245	女	0	0	1	2	3	2	1	0	0	11	22	17	20	20.5914	1	Dataset1
26997	女	0	0	1	1	3	0	0	0	1	6	49	15	4	18.8392	0	Dataset1
15011	女	0	0	1	2	3	0	1	1	0	10	49	17	8	19.9918	0	Dataset1
10866	女	0	0	0	1	2	1	0	0	0	7	26	11	15	20.95	0	Dataset1
26066	女	0	0	1	3	3	0	0	0	0	8	40	12	11	19.2307	0	Dataset1
15281	女	0	0	1	3	3	2	0	0	1	10	40	13	16	20.3833	0	Dataset1
6965	女	0	0	1	3	2	2	0	0	1	9	56	12	16	21.3443	0	Dataset1
26974	女	0	0	1	2	3	0	0	0	1	11	47	18	6	19.9644	0	Dataset1
15321	女	0	0	1	3	2	2	0	0	0	6	37	14	13	21.117	0	Dataset1
5445	女	0	0	1	2	3	3	2	2	1	12	45	15	44	22.0808	0	Dataset1
26878	女	0	0	0	2	3	0	0	0	1	9	32	17	11	19.1485	1	Dataset1
15387	女	0	0	1	2	3	0	0	0	3	6	37	18	2	20.3012	1	Dataset1
5462	女	0	0	1	2	3	2	1	0	1	7	36	16	15	21.2649	1	Dataset1
26500	女	0	0	1	1	2	0	0	0	0	8	13	18	4	18.8556	1	Dataset1
14966	女	0	0	1	2	3	0	0	0	1	9	13	20	3	20.011	1	Dataset1
10857	女	0	0	1	2	4	2	1	0	1	10	38	19	24	20.9665	1	Dataset1
25930	女	0	0	0	1	3	0	0	0	0	2	0	23	0	19.1485	0	Dataset1
14697	女	0	0	0	1	3	0	0	0	0	2	0	19	0	20.3039	0	Dataset1
4457	女	0	0	0	1	2	0	0	0	0	1	0	10	1	21.2649	0	Dataset1
26683	男	0	0	1	2	2	0	2	0	2	12	44	16	15	18.4668	0	Dataset1
16117	男	0	0	1	1	3	0	0	0	0	11	5	19	9	19.6194	0	Dataset1
7528	男	0	0	1	3	2	2	2	1	1	10	44	15	23	20.5804	0	Dataset1
24391	男	0	0	0	1	1	0	0	0	1	2	0	18	0	21.0924	0	Dataset1
15486	男	0	0	0	1	2	0	1	0	2	6	13	19	8	22.2423	0	Dataset1
3935	男	0	0	0	2	1	1	0	1	2	4	21	11	21	23.206	0	Dataset1
27829	女	0	0	0	1	2	0	0	0	2	0	3	10	1	19.1485	0	Dataset1
19093	女	0	0	0	2	3	0	0	0	2	0	5	13	0	20.2875	0	Dataset1
3864	女	0	0	0	2	2	0	1	0	1	11	17	10	25	21.2649	0	Dataset1
27629	女	0	0	1	2	3	2	1	1	1	10	36	16	22	18.653	3	Dataset1
19117	女	0	0	1	2	3	1	2	1	1	10	22	19	16	19.7919	3	Dataset1
4548	女	0	0	1	3	3	2	2	1	0	11	47	14	26	20.7693	3	Dataset1
24599	女	0	0	0	1	3	0	1	0	0	2	11	16	9	19.4415	0	Dataset1
19110	女	0	0	1	1	2	0	0	0	0	12	5	16	3	20.5777	0	Dataset1
5175	女	0	0	1	1	2	0	1	0	0	11	16	14	21	21.5551	0	Dataset1
27466	女	0	0	1	1	3	0	1	0	1	11	17	16	11	19.1485	0	Dataset1
15189	女	0	0	1	2	1	1	1	1	1	10	29	13	12	20.3012	0	Dataset1
5343	女	0	0	0	1	3	0	1	0	0	11	20	12	7	21.2649	0	Dataset1
24077	女	0	0	0	1	2	2	1	1	1	4	3	15	13	18.9678	2	Dataset1
18641	女	0	0	0	1	2	2	1	1	1	5	3	6	14	20.104	2	Dataset1
4055	女	0	0	1	1	2	2	1	1	1	11	15	9	20	21.0815	2	Dataset1
24174	女	0	0	1	2	3	0	1	0	0	9	22	20	16	19.1513	0	Dataset1
19106	女	0	0	1	2	3	0	0	0	0	9	33	16	16	20.2875	0	Dataset1
4370	女	0	0	1	2	3	0	0	0	0	7	35	20	15	21.2649	0	Dataset1
27573	女	0	0	1	1	1	0	1	0	0	3	3	9	4	18.7023	1	Dataset1
18264	女	0	0	1	2	3	0	0	0	0	5	12	17	9	19.8439	1	Dataset1
4051	女	0	0	1	3	3	2	1	0	0	8	16	12	17	20.8186	1	Dataset1
28486	女	0	0	0	1	2	0	1	1	0	5	15	15	7	19.0445	1	Dataset1
18465	女	0	1	0	2	3	0	1	1	6	7	25	16	6	20.1834	1	Dataset1
4418	女	0	1	1	2	2	2	1	1	6	10	16	15	21	21.1608	1	Dataset1
27753	女	0	0	0	1	2	0	0	0	0	2	25	16	8	18.5188	1	Dataset1
19167	女	0	0	1	2	3	0	1	1	0	7	28	15	19	19.6578	1	Dataset1
3705	女	0	1	0	1	3	3	0	0	6	6	20	18	15	20.6352	1	Dataset1
27768	女	0	0	1	2	3	2	0	0	0	5	27	20	9	18.5133	1	Dataset1
18682	女	0	0	1	2	4	2	1	1	0	6	13	22	10	19.6523	1	Dataset1
4436	女	0	0	1	3	3	2	1	0	0	8	37	15	15	20.6297	1	Dataset1
27795	女	0	0	1	2	2	0	0	0	1	11	32	13	4	19.1677	0	Dataset1
19187	女	0	0	1	2	4	0	0	0	0	4	9	18	4	20.3066	0	Dataset1
3907	女	0	0	1	4	3	0	0	0	1	12	50	11	13	21.2841	0	Dataset1
28482	女	0	0	0	2	3	0	0	1	0	0	19	19	9	19.1567	2	Dataset1
19181	女	1	0	0	1	3	0	0	2	2	2	24	25	7	20.2957	2	Dataset1
10514	女	0	0	1	2	2	0	1	1	4	9	66	15	25	21.2676	2	Dataset1
25075	女	0	0	1	2	3	2	2	1	2	11	25	17	25	21.5277	0	Dataset1
17915	女	0	0	1	2	1	2	0	0	1	12	18	18	7	22.6749	0	Dataset1
10063	女	1	0	1	3	3	0	1	0	1	12	35	17	15	23.6386	0	Dataset1
25041	男	0	0	1	1	3	2	1	0	0	8	7	17	16	18.4203	2	Dataset1
17911	男	0	0	1	1	2	2	2	0	2	10	17	13	19	19.5674	2	Dataset1
10405	男	0	1	1	3	2	3	2	1	6	12	40	9	26	20.5311	2	Dataset1
25078	男	0	0	1	2	3	0	1	0	1	8	32	15	15	20.4791	0	Dataset1
17611	男	0	0	1	2	2	0	1	0	2	9	17	9	12	21.6263	0	Dataset1
10664	男	0	0	0	1	2	0	1	0	1	8	37	12	19	22.59	0	Dataset1
25359	女	0	0	0	1	3	0	0	0	1	3	2	13	4	20.5092	0	Dataset1
17693	女	0	0	0	1	3	0	0	0	1	4	6	15	3	21.6564	0	Dataset1
9905	女	0	0	0	1	3	0	0	1	1	8	13	12	14	22.6229	0	Dataset1
29406	女	0	0	0	4	3	1	0	0	0	8	18	15	3	19.2334	2	Dataset1
17663	女	0	0	1	3	2	1	2	0	1	10	25	10	23	20.3833	2	Dataset1
10911	女	0	0	1	4	2	2	1	0	0	10	43	11	21	21.347	2	Dataset1
27979	女	0	0	0	2	3	0	0	0	0	3	16	15	7	19.1485	1	Dataset1
17231	女	0	1	0	2	2	0	0	1	6	1	51	14	5	20.2984	1	Dataset1
5914	女	0	1	1	2	3	1	1	1	7	4	47	14	15	21.2621	1	Dataset1
24619	女	0	0	0	2	3	0	2	0	2	6	34	21	25	19.7947	0	Dataset1
17673	女	0	0	1	2	3	0	0	0	2	5	31	20	15	20.9391	0	Dataset1
9971	女	0	0	0	3	3	0	0	0	2	5	50	21	21	21.9055	0	Dataset1
24624	男	0	0	0	1	2	0	1	0	0	5	12	14	6	18.9405	1	Dataset1
17891	男	0	0	0	2	1	0	1	1	0	6	5	13	14	20.0849	1	Dataset1
9982	男	0	0	1	3	2	1	1	1	0	5	17	10	17	21.0513	1	Dataset1
24915	男	0	0	0	1	3	0	0	0	1	1	6	18	1	19.1595	1	Dataset1
17882	男	0	0	1	1	4	0	1	0	2	10	28	16	16	20.3039	1	Dataset1
9985	男	0	0	1	2	2	0	0	0	1	8	21	8	19	21.2704	1	Dataset1
23319	男	0	0	1	2	2	2	1	0	1	8	19	10	12	19.154	0	Dataset1
16682	男	0	0	0	2	2	0	0	0	1	2	36	13	11	20.2984	0	Dataset1
4782	男	0	0	1	1	2	2	0	0	1	8	31	11	14	21.2649	0	Dataset1
24940	女	1	0	0	2	4	0	0	0	2	8	21	22	0	19.4086	0	Dataset1
17735	女	0	0	0	1	4	0	0	0	1	8	32	17	18	20.553	0	Dataset1
10179	女	0	0	1	1	4	0	1	0	2	11	31	18	17	21.5168	0	Dataset1
24935	女	0	0	1	1	3	0	1	0	0	6	7	19	10	18.1985	0	Dataset1
18306	女	0	0	1	1	3	0	0	0	0	5	6	18	7	19.3429	0	Dataset1
10964	女	0	0	1	1	2	0	1	1	0	12	11	17	19	20.3066	0	Dataset1
24393	男	0	0	0	2	1	0	0	1	0	4	17	13	22	19.1513	3	Dataset1
15722	男	0	0	1	2	1	3	2	1	0	9	25	12	22	20.3012	3	Dataset1
3729	男	0	0	1	3	3	3	2	1	1	6	53	15	33	21.2649	3	Dataset1
24437	女	0	0	1	3	3	0	1	1	1	12	24	16	19	19.1513	1	Dataset1
19307	女	0	0	1	5	2	2	0	1	3	10	30	13	20	20.2437	1	Dataset1
3898	女	0	0	1	5	2	0	1	1	4	12	40	10	27	21.2649	1	Dataset1
24138	女	0	0	1	3	3	0	1	1	0	5	25	20	17	20	0	Dataset1
16589	女	0	0	1	3	3	0	0	0	1	3	10	16	2	21.1499	0	Dataset1
4156	女	0	0	1	3	3	0	1	0	0	4	36	18	16	22.1136	0	Dataset1
23973	男	0	0	1	2	3	1	1	1	0	11	45	17	23	19.154	1	Dataset1
16248	男	0	0	1	2	3	0	1	1	1	7	27	20	11	20.3012	1	Dataset1
3660	男	0	0	1	3	3	0	2	1	1	5	37	15	21	21.2649	1	Dataset1
24232	男	0	0	0	1	2	0	0	0	1	7	7	16	1	19.1513	1	Dataset1
19003	男	0	0	1	4	2	1	1	0	1	8	29	15	16	20.2437	1	Dataset1
3665	男	0	0	1	3	2	0	1	0	0	11	18	13	17	21.2649	1	Dataset1
29424	女	0	0	0	1	3	0	0	0	0	0	10	19	0	19.1485	0	Dataset1
16135	女	0	0	0	1	2	0	0	0	0	0	6	19	2	20.3012	0	Dataset1
8306	女	0	0	1	2	3	0	0	0	0	5	35	20	18	21.2621	0	Dataset1
29298	女	0	0	0	1	3	0	0	0	0	2	5	16	5	18.6174	1	Dataset1
17431	女	0	0	0	1	2	0	0	0	1	4	17	14	8	19.7673	1	Dataset1
5980	女	0	0	1	1	2	0	1	0	1	8	36	16	15	20.731	1	Dataset1
27911	男	1	0	1	1	2	0	1	1	1	9	22	18	13	18.601	1	Dataset1
17471	男	1	0	1	1	2	2	1	1	2	11	37	16	28	19.7509	1	Dataset1
8796	男	1	0	1	1	2	2	1	1	2	11	33	16	22	20.7146	1	Dataset1
29350	男	0	0	1	1	2	0	1	0	1	4	4	20	7	18.653	1	Dataset1
16618	男	0	0	1	1	2	0	1	0	0	10	11	16	13	19.8029	1	Dataset1
7906	男	0	0	1	1	1	0	1	0	2	11	10	16	18	20.7666	1	Dataset1
28294	女	0	0	0	3	3	1	2	0	2	10	64	18	29	18.4175	1	Dataset1
16641	女	0	0	0	3	3	1	2	1	2	10	51	17	22	19.5674	1	Dataset1
8818	女	0	0	1	1	3	0	1	0	1	10	40	15	16	20.5311	1	Dataset1
29284	女	0	0	1	2	2	0	0	0	2	7	33	17	6	20.6324	1	Dataset1
17169	女	0	0	1	2	2	0	0	1	2	11	47	15	7	21.7823	1	Dataset1
7245	女	0	0	1	2	2	2	1	1	1	9	48	12	17	22.7461	1	Dataset1
26803	男	0	0	0	2	3	0	0	0	1	3	32	17	5	20.5476	1	Dataset1
16966	男	0	0	0	2	3	0	0	0	0	3	29	17	1	21.6975	1	Dataset1
6685	男	1	1	1	2	1	0	1	0	15	12	9	1	2	22.6612	1	Dataset1
28824	女	0	0	1	3	3	1	1	1	0	9	26	17	16	19.1485	2	Dataset1
17570	女	0	0	1	3	3	2	2	1	2	11	28	14	17	20.2984	2	Dataset1
7948	女	0	1	1	4	4	2	2	1	7	5	39	20	13	21.2621	2	Dataset1
29433	男	0	0	0	2	2	0	2	1	0	9	40	16	20	18.9103	1	Dataset1
17446	男	0	0	1	2	1	0	1	0	0	7	12	10	10	20.0602	1	Dataset1
8637	男	0	0	1	3	1	0	1	0	0	7	33	9	14	21.024	1	Dataset1
29428	女	0	0	1	1	2	0	1	1	0	6	10	18	21	19.5455	0	Dataset1
17262	女	0	0	1	1	2	0	1	1	0	6	25	16	15	20.6954	0	Dataset1
6755	女	0	0	0	2	2	2	1	0	0	3	35	17	23	21.6591	0	Dataset1
28754	女	0	0	1	2	3	0	1	0	0	5	21	15	14	19.3429	0	Dataset1
17493	女	0	0	1	2	3	0	1	0	0	6	11	14	17	20.4928	0	Dataset1
6483	女	0	0	1	2	3	0	1	0	0	11	21	14	19	21.4565	0	Dataset1
29440	男	0	0	1	2	3	0	0	0	0	12	31	17	1	19.1485	1	Dataset1
17244	男	0	0	1	2	3	0	0	0	0	8	13	20	5	20.2984	1	Dataset1
6721	男	0	0	1	2	3	2	1	0	0	12	22	19	24	21.2621	1	Dataset1
29312	男	0	0	0	1	3	0	0	0	0	0	7	21	0	19.1485	2	Dataset1
17206	男	0	0	1	2	3	0	0	0	1	2	26	17	7	20.2984	2	Dataset1
7013	男	0	1	1	3	3	1	1	1	7	11	35	17	28	21.2621	2	Dataset1
29311	女	0	0	1	5	4	2	1	1	0	12	45	18	17	18.3628	1	Dataset1
17767	女	0	0	1	3	3	1	1	1	0	12	44	18	22	19.5127	1	Dataset1
8698	女	0	0	1	4	3	1	1	1	1	12	31	15	16	20.4764	1	Dataset1
29349	女	0	0	1	2	4	0	1	0	1	7	35	25	19	18.7625	1	Dataset1
17433	女	0	0	1	2	3	3	1	0	0	8	28	17	22	19.9124	1	Dataset1
5083	女	0	0	1	3	4	0	1	1	0	11	27	18	21	20.8789	1	Dataset1
28810	女	0	0	0	1	3	0	1	0	0	1	8	18	7	18.6721	1	Dataset1
17331	女	0	0	1	1	3	0	0	0	0	5	1	22	8	19.822	1	Dataset1
8391	女	0	0	0	2	3	2	1	0	0	6	40	16	16	20.7858	1	Dataset1
27694	女	0	0	1	2	2	0	1	1	0	12	11	11	18	20.0767	2	Dataset1
17626	女	0	0	1	2	2	2	1	1	0	7	31	13	30	21.2238	2	Dataset1
10346	女	0	0	1	3	3	1	1	1	0	10	53	15	24	22.1875	2	Dataset1
29504	男	0	0	0	1	3	0	0	0	0	7	16	14	3	18.9185	1	Dataset1
17257	男	0	0	0	2	3	1	0	1	0	5	23	14	20	20.0684	1	Dataset1
5143	男	0	0	0	1	2	1	1	2	1	6	4	11	29	21.0349	1	Dataset1
29513	男	0	0	1	3	2	0	1	1	0	12	54	13	15	19.3238	2	Dataset1
17225	男	0	0	0	3	2	1	1	1	0	10	54	14	17	20.4736	2	Dataset1
8130	男	0	0	0	3	3	0	1	1	0	9	55	17	17	21.4374	2	Dataset1
27548	男	0	0	1	1	3	0	1	0	0	10	60	19	13	19.6797	0	Dataset1
17232	男	0	0	1	3	1	1	2	1	0	12	45	17	21	20.8296	0	Dataset1
5000	男	0	0	1	2	3	1	1	0	0	10	43	20	23	21.796	0	Dataset1
29308	女	0	0	0	1	2	2	1	1	0	10	47	12	17	19.1485	2	Dataset1
17401	女	0	0	1	1	2	0	1	1	3	9	24	14	17	20.2984	2	Dataset1
4714	女	0	0	1	1	2	2	1	0	0	8	42	14	21	21.2649	2	Dataset1
29343	女	0	0	1	2	3	2	1	1	1	12	44	14	16	19.1485	1	Dataset1
17404	女	0	0	1	3	4	2	1	1	0	12	52	17	18	20.2984	1	Dataset1
8631	女	0	0	1	3	4	2	1	1	2	12	39	19	29	21.2621	1	Dataset1
27652	女	0	0	0	1	3	0	0	0	0	3	29	16	12	19.1513	0	Dataset1
16755	女	0	0	0	2	2	0	1	0	1	7	51	16	15	20.3012	0	Dataset1
6215	女	0	0	0	3	3	0	2	0	1	9	64	18	21	21.2649	0	Dataset1
28633	男	0	0	1	2	2	1	1	0	0	9	22	9	11	19.1485	3	Dataset1
16604	男	0	0	1	2	2	2	1	1	1	7	46	13	22	20.2984	3	Dataset1
6226	男	0	0	1	2	2	2	2	2	0	8	27	12	26	21.2621	3	Dataset1
29025	男	0	0	1	3	2	0	0	0	0	9	22	9	4	19.1485	2	Dataset1
17596	男	0	0	1	2	1	0	1	1	0	8	38	8	17	20.2984	2	Dataset1
7294	男	0	0	1	4	2	2	0	1	0	10	36	11	20	21.2621	2	Dataset1
24175	男	0	0	1	2	3	0	0	0	3	6	39	16	7	19.7591	0	Dataset1
16162	男	0	0	0	2	4	0	0	0	3	5	27	18	5	20.909	0	Dataset1
3573	男	1	0	1	1	3	0	0	0	4	4	41	15	15	21.8727	0	Dataset1
28296	男	0	0	0	1	3	0	0	0	1	0	1	18	0	19.1622	1	Dataset1
15515	男	0	0	0	3	3	1	1	1	1	0	32	13	25	20.3149	1	Dataset1
9745	男	0	0	1	2	1	2	1	0	4	11	26	13	25	21.2758	1	Dataset1
23865	女	0	0	0	3	2	3	0	1	0	5	10	12	31	19.8056	2	Dataset1
15503	女	1	0	0	3	2	2	1	0	1	4	10	14	23	20.9555	2	Dataset1
3256	女	0	0	1	2	2	2	1	0	1	4	10	11	23	21.922	2	Dataset1
28038	女	0	0	1	1	1	1	2	1	0	10	25	14	40	19.1485	2	Dataset1
16315	女	0	1	1	1	1	2	3	1	7	9	15	13	31	20.3012	2	Dataset1
3769	女	0	0	1	1	1	0	2	1	2	12	14	11	23	21.2649	2	Dataset1
28384	女	0	0	1	3	2	2	2	1	1	11	55	13	28	19.9014	3	Dataset1
16249	女	0	1	1	3	3	2	1	1	7	6	46	16	24	21.0541	3	Dataset1
3751	女	0	0	1	2	3	1	1	1	1	11	61	13	14	22.0178	3	Dataset1
20231	男	0	0	1	1	3	0	0	0	0	2	48	21	5	17.5496	1	Dataset1
18050	男	0	0	1	2	3	0	0	0	0	5	64	17	11	18.0534	1	Dataset1
10534	男	0	0	0	2	3	0	1	0	0	5	60	16	16	19.0171	1	Dataset1
20259	女	0	0	0	2	3	0	1	1	0	1	33	20	14	20.1889	0	Dataset1
17887	女	0	0	1	2	3	2	2	2	0	11	33	17	43	20.6927	0	Dataset1
10440	女	0	0	1	3	3	1	1	1	2	6	55	13	29	21.6564	0	Dataset1
20312	女	0	0	0	1	3	0	0	0	1	3	28	18	14	18.5845	1	Dataset1
18075	女	0	0	0	2	3	0	0	1	0	1	35	20	10	19.0883	1	Dataset1
10617	女	0	0	1	2	3	2	1	0	1	4	43	14	23	20.052	1	Dataset1
20217	男	0	0	0	1	1	0	1	1	3	6	13	15	20	17.8946	1	Dataset1
18141	男	1	0	0	1	2	2	1	1	3	9	23	18	27	18.3984	1	Dataset1
10134	男	0	0	0	1	2	2	1	0	4	6	19	12	20	19.3621	1	Dataset1
20303	女	0	0	0	1	2	0	1	0	0	8	15	17	10	19.6742	2	Dataset1
18134	女	0	0	0	1	2	2	0	0	1	7	15	8	24	20.178	2	Dataset1
10382	女	0	0	1	1	2	1	1	1	0	10	21	8	19	21.1417	2	Dataset1
20215	女	0	0	1	1	3	0	0	1	0	4	13	18	12	19.7864	0	Dataset1
17703	女	0	0	1	3	4	1	2	0	1	8	17	17	28	20.2902	0	Dataset1
10634	女	0	0	1	1	2	2	1	0	1	12	12	17	19	21.2539	0	Dataset1
20598	男	0	0	1	1	3	0	1	1	1	11	19	16	18	17.7139	0	Dataset1
18156	男	0	0	1	3	4	0	0	0	1	10	47	22	4	18.2177	0	Dataset1
8833	男	0	0	0	3	4	1	1	0	0	9	35	19	18	19.1841	0	Dataset1
21755	男	0	0	1	4	3	2	1	1	3	12	59	15	32	19.7974	0	Dataset1
18093	男	0	0	1	4	3	2	1	1	3	11	59	21	22	20.3066	0	Dataset1
10990	男	0	0	1	5	2	1	1	1	2	12	45	17	21	21.2704	0	Dataset1
21694	男	0	0	1	1	1	2	1	0	0	10	43	11	21	18.7817	0	Dataset1
18016	男	0	0	1	3	2	0	1	0	0	10	47	11	19	19.2909	0	Dataset1
10751	男	0	0	1	2	1	0	1	0	0	7	33	12	16	20.2546	0	Dataset1
21767	女	0	0	1	2	3	0	0	1	1	10	8	20	11	18.3929	2	Dataset1
18363	女	0	0	0	2	3	0	0	0	1	7	23	21	4	18.9021	2	Dataset1
10457	女	0	0	1	3	3	2	2	1	0	6	54	18	34	19.8658	2	Dataset1
21766	女	0	1	1	1	4	0	0	0	6	9	20	20	10	18.7734	0	Dataset1
17994	女	0	0	1	2	4	2	0	1	0	7	42	20	12	19.2827	0	Dataset1
10448	女	0	0	1	2	4	2	1	1	0	4	44	20	21	20.2464	0	Dataset1
21719	女	0	0	0	2	2	2	1	1	0	8	54	14	9	18.1766	2	Dataset1
18303	女	0	0	1	3	3	2	1	1	0	11	52	15	19	18.6858	2	Dataset1
9178	女	0	1	1	2	2	2	1	1	6	11	58	13	13	19.6523	2	Dataset1
21735	女	0	0	1	2	3	2	1	1	3	9	46	15	22	18.3381	1	Dataset1
18142	女	1	0	1	3	1	2	1	1	3	11	39	7	29	18.8474	1	Dataset1
8832	女	0	0	1	3	2	2	1	1	3	11	42	9	37	19.8138	1	Dataset1
21771	女	0	0	0	3	3	0	0	0	0	9	44	18	16	20.0082	0	Dataset1
18295	女	0	0	1	2	4	0	0	0	0	5	50	21	13	20.5175	0	Dataset1
8960	女	0	0	1	3	4	0	0	0	0	11	21	20	14	21.4839	0	Dataset1
